# Supplementary material for: X-ray diffraction and theoretical study of the transition 2H-3R polytypes in Nb 1+x Se 2 (0 < x < 0.1)
Source: PeerJ journal article supplement (doi:10.7717/peerj-ichem.2), 2021-03-30
Supplement: DFT_2H-Nb1.1Se2.docx [file DFT_2H-Nb1.1Se2.docx]

2H-Nb1.1Se2-7-UF CASTEP GeomOpt


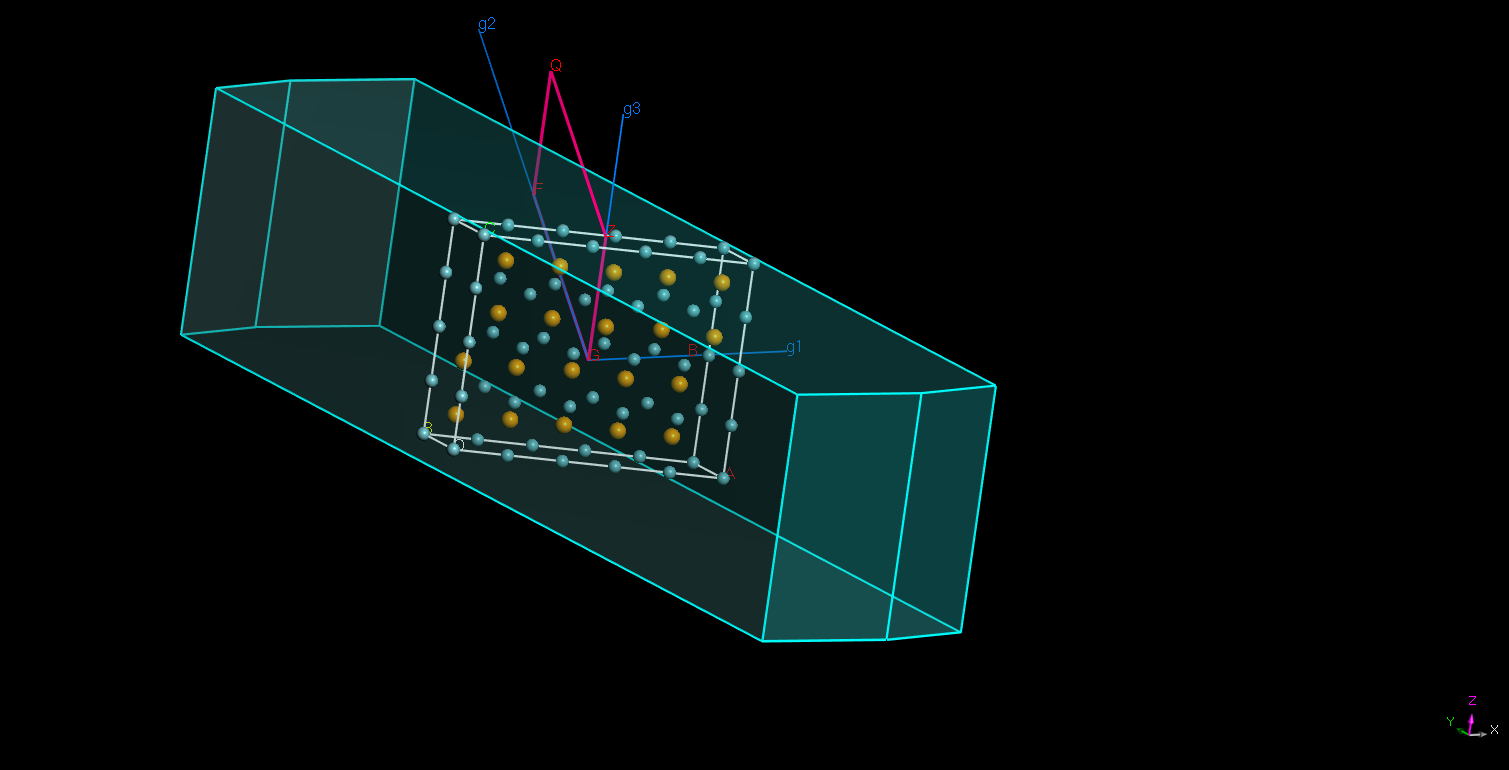


2H-Nb1.1Se2-7-UF Band Structure


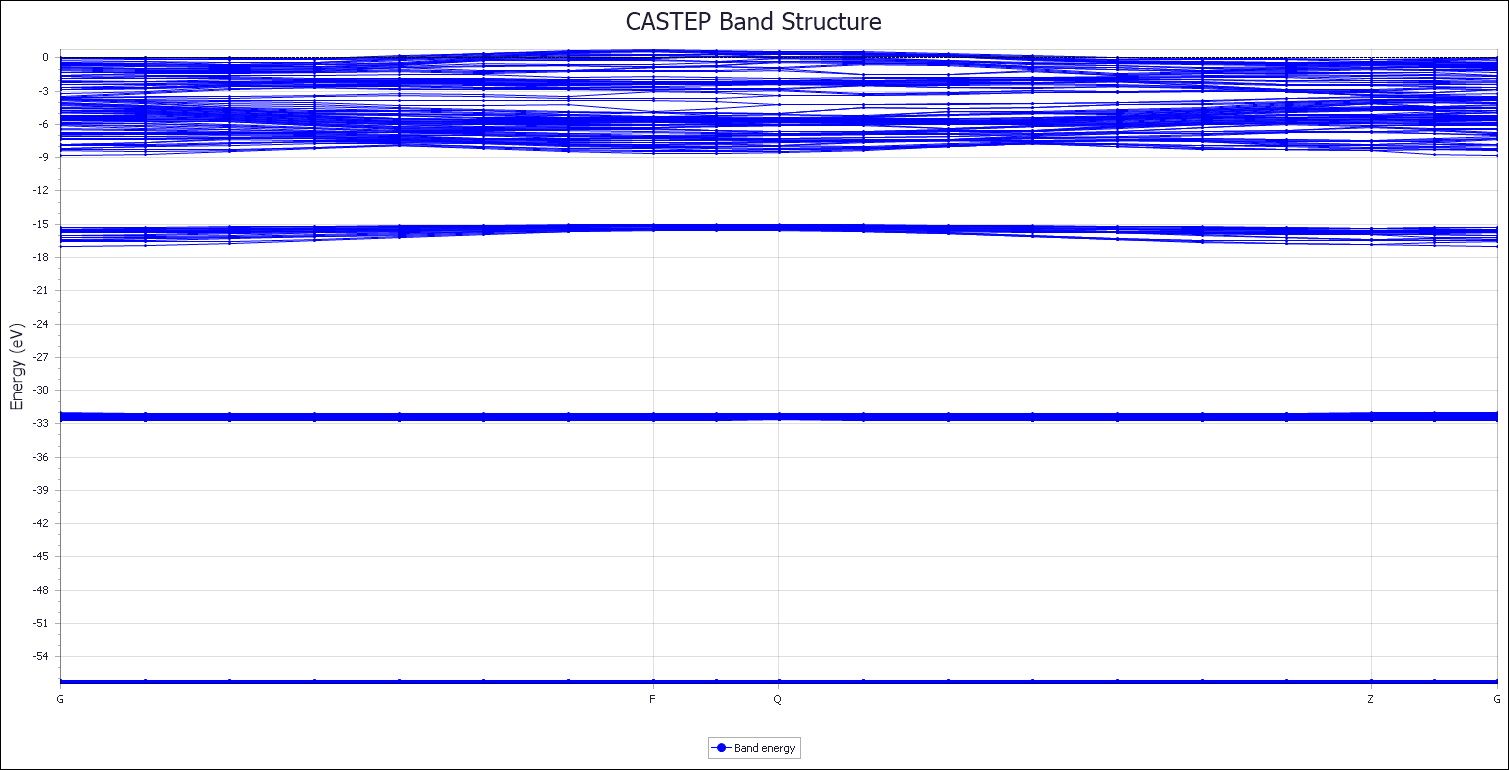


2H-Nb1.1Se2-7-UF PDOS-Total


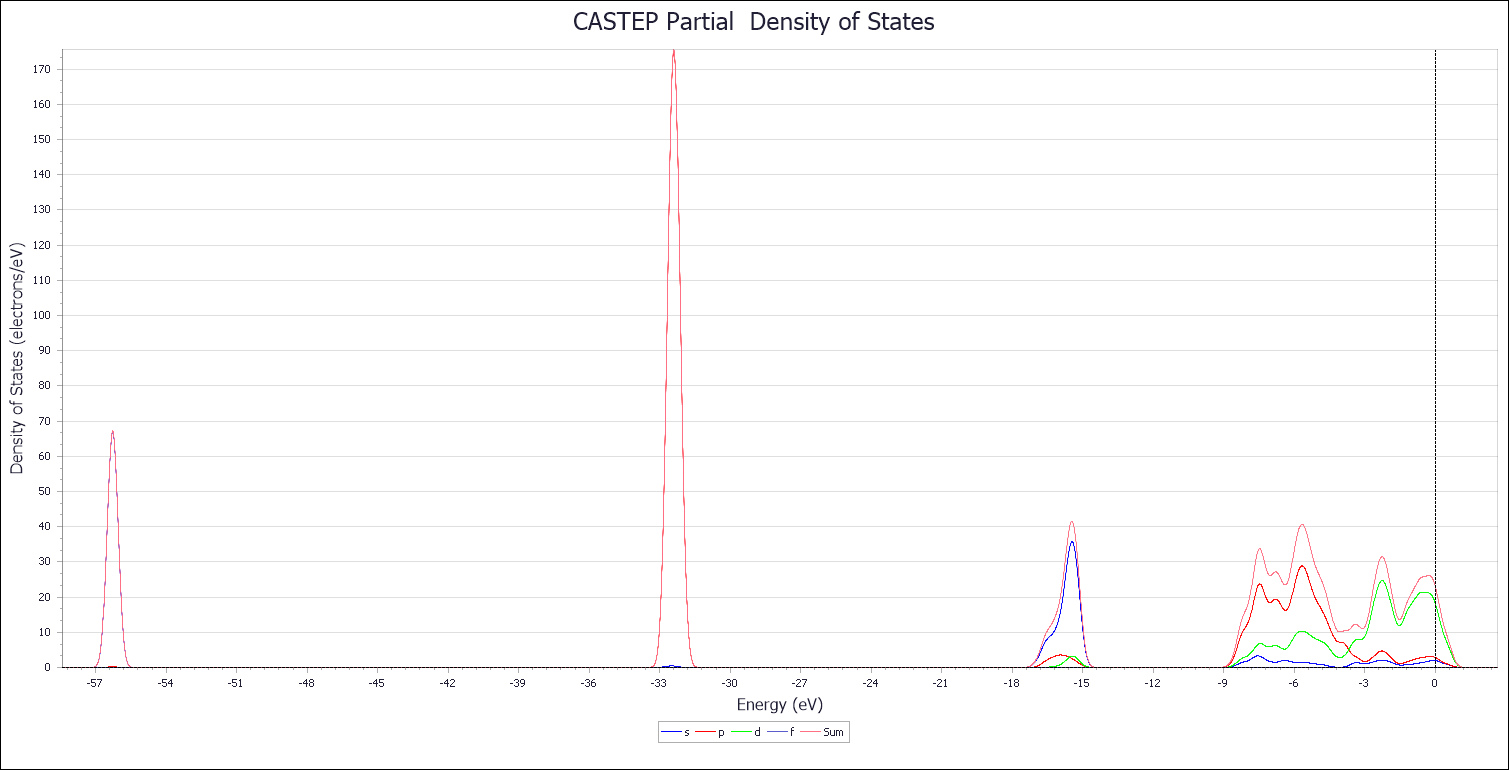


2H-Nb1.1Se2-7-UF PDOS-Nb


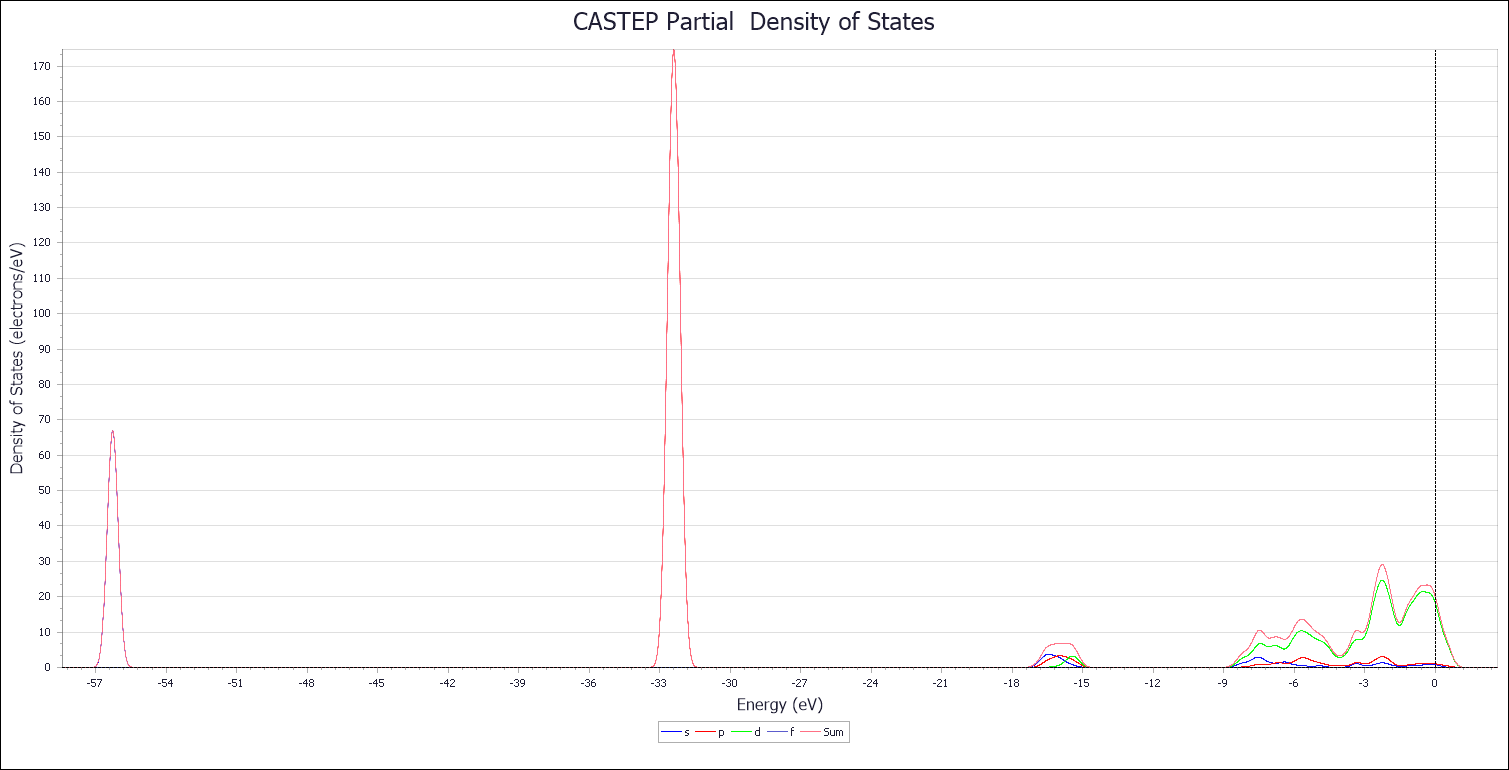


2H-Nb1.1Se2-7-UF PDOS-Se


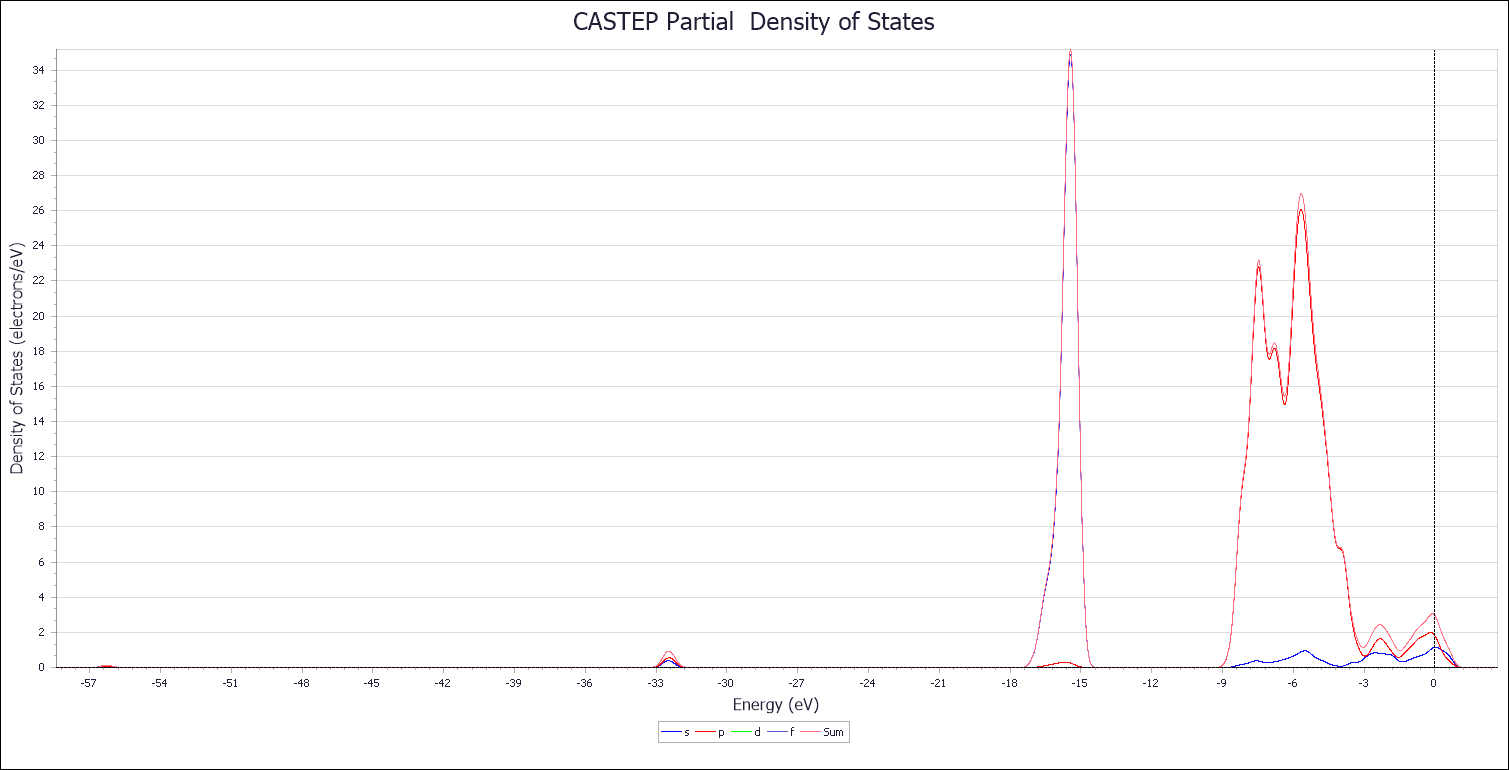


Job started on host DESKTOP-UVBHK2J

at Wed Mar 4 11:35:50 2020

+-------------------------------------------------+

| |

| CCC AA SSS TTTTT EEEEE PPPP |

| C A A S T E P P |

| C AAAA SS T EEE PPPP |

| C A A S T E P |

| CCC A A SSS T EEEEE P |

| |

+-------------------------------------------------+

| |

| Welcome to Materials Studio CASTEP version 8.0 |

| Ab Initio Total Energy Program |

| |

| Authors: |

| M. Segall, M. Probert, C. Pickard, P. Hasnip, |

| S. Clark, K. Refson, J. R. Yates, M. Payne |

| |

| Contributors: |

| P. Lindan, P. Haynes, J. White, V. Milman, |

| N. Govind, M. Gibson, P. Tulip, V. Cocula, |

| B. Montanari, D. Quigley, M. Glover, |

| L. Bernasconi, A. Perlov, M. Plummer, |

| E. McNellis, J. Meyer, J. Gale, D. Jochym |

| J. Aarons, B. Walker, R. Gillen, D. Jones |

| T. Green |

| |

| Copyright (c) 2000 - 2014 |

| |

| Please cite |

| |

| "First principles methods using CASTEP" |

| |

| Zeitschrift fuer Kristallographie |

| 220(5-6) pp. 567-570 (2005) |

| |

| S. J. Clark, M. D. Segall, C. J. Pickard, |

| P. J. Hasnip, M. J. Probert, K. Refson, |

| M. C. Payne |

| |

| in all publications arising from |

| your use of CASTEP |

| |

+-------------------------------------------------+

This version was compiled for x86_64-windows-msvc2008 on Dec 04 2014

Code version: 6546

Intel(R) Math Kernel Library Version 11.1.2

Fundamental constants values: CODATA 2010

License checkout of MS_castep successful

Pseudo atomic calculation performed for Se 4s2 4p4

Converged in 17 iterations to a total energy of -256.4822 eV

Pseudo atomic calculation performed for Nb 4s2 4p6 4d4 5s1

Converged in 18 iterations to a total energy of -1541.3312 eV

Calculation parallelised over 14 processes.

Data is distributed by G-vector(2-way) and k-point(7-way)

************************************ Title ************************************

CASTEP calculation from Materials Studio

***************************** General Parameters ******************************

output verbosity : normal (1)

write checkpoint data to : 2H-Nb1.1Se2-7-UF.check

type of calculation : geometry optimization

stress calculation : on

density difference calculation : off

electron localisation func (ELF) calculation : off

Hirshfeld analysis : on

unlimited duration calculation

timing information : on

memory usage estimate : on

write final potential to formatted file : off

write final density to formatted file : off

write BibTeX reference list : on

checkpoint writing : both castep_bin and check files

output length unit : A

output mass unit : amu

output time unit : ps

output charge unit : e

output spin unit : hbar/2

output energy unit : eV

output force unit : eV/A

output velocity unit : A/ps

output pressure unit : GPa

output inv_length unit : 1/A

output frequency unit : cm-1

output force constant unit : eV/A**2

output volume unit : A**3

output IR intensity unit : (D/A)**2/amu

output dipole unit : D

output efield unit : eV/A/e

output entropy unit : J/mol/K

wavefunctions paging : none

random number generator seed : randomised (113551346)

data distribution : optimal for this architecture

optimization strategy : balance speed and memory

*********************** Exchange-Correlation Parameters ***********************

using functional : Perdew Burke Ernzerhof

Divergence correction : off

relativistic treatment : Koelling-Harmon

DFT+D: Semi-empirical dispersion correction : off

************************* Pseudopotential Parameters **************************

pseudopotential representation : reciprocal space

<beta|phi> representation : reciprocal space

**************************** Basis Set Parameters *****************************

plane wave basis set cut-off : 500.0000 eV

size of standard grid : 1.5000

size of fine gmax : 17.1836 1/A

largest prime factor in FFT : 5

finite basis set correction : automatic

number of sample energies : 3

sample spacing : 5.0000 eV

**************************** Electronic Parameters ****************************

number of electrons : 380.0

net charge of system : 0.000

net spin of system : 0.000

number of up spins : 190.0

number of down spins : 190.0

treating system as non-spin-polarized

number of bands : 190

********************* Electronic Minimization Parameters **********************

Method: Treating system as non-metallic,

and number of SD steps : 1

and number of CG steps : 4

total energy / atom convergence tol. : 0.2000E-05 eV

eigen-energy convergence tolerance : 0.4211E-06 eV

max force / atom convergence tol. : ignored

convergence tolerance window : 3 cycles

max. number of SCF cycles : 100

periodic dipole correction : NONE

************************** Density Mixing Parameters **************************

density-mixing scheme : Pulay

max. length of mixing history : 20

charge density mixing amplitude : 0.5000

cut-off energy for mixing : 500.0 eV

charge density mixing g-vector : 1.500 1/A

*********************** Population Analysis Parameters ************************

Population analysis with cutoff : 3.000 A

********************** Geometry Optimization Parameters ***********************

optimization method : BFGS

variable cell method : fixed basis quality

max. number of steps : 100

estimated bulk modulus : 500.0 GPa

estimated <frequency> : 1668. cm-1

geom line minimiser : on

with line minimiser tolerance : 0.4000

total energy convergence tolerance : 0.5000E-05 eV/atom

max ionic |force| tolerance : 0.1000E-01 eV/A

max ionic |displacement| tolerance : 0.5000E-03 A

max |stress component| tolerance : 0.2000E-01 GPa

convergence tolerance window : 2 steps

backup results every : 5 steps

*******************************************************************************

-------------------------------

Unit Cell

-------------------------------

Real Lattice(A) Reciprocal Lattice(1/A)

14.9281129 -8.6187500 0.0000000 0.4208962 0.0000000 0.0000000

0.0000000 3.4475000 0.0000000 1.0522404 1.8225338 0.0000000

0.0000000 0.0000000 12.5702000 0.0000000 0.0000000 0.4998477

Lattice parameters(A) Cell Angles

a = 17.237500 alpha = 90.000000

b = 3.447500 beta = 90.000000

c = 12.570200 gamma = 120.000000

Current cell volume = 646.921185 A**3

-------------------------------

Cell Contents

-------------------------------

Total number of ions in cell = 40

Total number of species in cell = 2

Max number of any one species = 20

xxxxxxxxxxxxxxxxxxxxxxxxxxxxxxxxxxxxxxxxxxxxxxxxxxxxxxxxxxxx

x Element Atom Fractional coordinates of atoms x

x Number u v w x

x----------------------------------------------------------x

x Se 1 0.066667 0.666667 0.117300 x

x Se 2 0.133333 0.333333 0.617300 x

x Se 3 0.133333 0.333333 0.882700 x

x Se 4 0.066667 0.666667 0.382700 x

x Se 5 0.266667 0.666667 0.117300 x

x Se 6 0.333333 0.333333 0.617300 x

x Se 7 0.333333 0.333333 0.882700 x

x Se 8 0.266667 0.666667 0.382700 x

x Se 9 0.466667 0.666667 0.117300 x

x Se 10 0.533333 0.333333 0.617300 x

x Se 11 0.533333 0.333333 0.882700 x

x Se 12 0.466667 0.666667 0.382700 x

x Se 13 0.666667 0.666667 0.117300 x

x Se 14 0.733333 0.333333 0.617300 x

x Se 15 0.733333 0.333333 0.882700 x

x Se 16 0.666667 0.666667 0.382700 x

x Se 17 0.866667 0.666667 0.117300 x

x Se 18 0.933333 0.333333 0.617300 x

x Se 19 0.933333 0.333333 0.882700 x

x Se 20 0.866667 0.666667 0.382700 x

x Nb 1 0.000000 0.000000 0.250000 x

x Nb 2 0.000000 0.000000 0.750000 x

x Nb 3 0.000000 0.000000 0.000000 x

x Nb 4 0.000000 0.000000 0.500000 x

x Nb 5 0.200000 0.000000 0.250000 x

x Nb 6 0.200000 0.000000 0.750000 x

x Nb 7 0.200000 0.000000 0.000000 x

x Nb 8 0.200000 0.000000 0.500000 x

x Nb 9 0.400000 0.000000 0.250000 x

x Nb 10 0.400000 0.000000 0.750000 x

x Nb 11 0.400000 0.000000 0.000000 x

x Nb 12 0.400000 0.000000 0.500000 x

x Nb 13 0.600000 0.000000 0.250000 x

x Nb 14 0.600000 0.000000 0.750000 x

x Nb 15 0.600000 0.000000 0.000000 x

x Nb 16 0.600000 0.000000 0.500000 x

x Nb 17 0.800000 0.000000 0.250000 x

x Nb 18 0.800000 0.000000 0.750000 x

x Nb 19 0.800000 0.000000 0.000000 x

x Nb 20 0.800000 0.000000 0.500000 x

xxxxxxxxxxxxxxxxxxxxxxxxxxxxxxxxxxxxxxxxxxxxxxxxxxxxxxxxxxxx

No user defined ionic velocities

-------------------------------

Details of Species

-------------------------------

Mass of species in AMU

Se 78.9599991

Nb 92.9059982

Electric Quadrupole Moment (Barn)

Se 1.0000000 No Isotope Defined

Nb -0.3200000 Isotope 93

Files used for pseudopotentials:

Se Se_00.usp

Nb Nb_00PBE.usp

-------------------------------

k-Points For BZ Sampling

-------------------------------

MP grid size for SCF calculation is 1 7 2

with an offset of 0.000 0.000 0.000

Number of kpoints used = 7

-------------------------------

Symmetry and Constraints

-------------------------------

Cell is a supercell containing 5 primitive cells

Maximum deviation from symmetry = 0.00000 ANG

There are no symmetry operations specified or generated for this cell

There are no ionic constraints specified or generated for this cell

Point group of crystal = 1: C1, 1, 1

Space group of crystal = 194: P6_3/mmc, -P 6c 2c

Centre of mass is NOT constrained

Number of cell constraints= 0

Cell constraints are: 1 2 3 4 5 6

External pressure/stress (GPa)

0.00000 0.00000 0.00000

0.00000 0.00000

0.00000

+---------------- MEMORY AND SCRATCH DISK ESTIMATES PER PROCESS --------------+

| Memory Disk |

| Model and support data 156.1 MB 111.0 MB |

| Electronic energy minimisation requirements 80.4 MB 0.0 MB |

| ----------------------------- |

| Approx. total storage required per process 236.5 MB 111.0 MB |

| |

| Requirements will fluctuate during execution and may exceed these estimates |

+-----------------------------------------------------------------------------+

Calculating finite basis set correction with 3 cut-off energies.

Calculating total energy with cut-off of 490.000eV.

------------------------------------------------------------------------ <-- SCF

SCF loop Energy Energy gain Timer <-- SCF

per atom (sec) <-- SCF

------------------------------------------------------------------------ <-- SCF

Initial -2.63678348E+004 5.38 <-- SCF

1 -3.52131684E+004 2.21133340E+002 33.92 <-- SCF

2 -3.62201200E+004 2.51737897E+001 55.92 <-- SCF

3 -3.62583210E+004 9.55022989E-001 77.42 <-- SCF

4 -3.62517267E+004 -1.64856565E-001 102.53 <-- SCF

5 -3.62518734E+004 3.66673397E-003 126.95 <-- SCF

6 -3.62518775E+004 1.04035660E-004 151.77 <-- SCF

7 -3.62519337E+004 1.40366822E-003 176.11 <-- SCF

8 -3.62519645E+004 7.70457788E-004 200.34 <-- SCF

9 -3.62519834E+004 4.73407943E-004 221.84 <-- SCF

10 -3.62519962E+004 3.20245002E-004 239.89 <-- SCF

11 -3.62520050E+004 2.18352504E-004 258.16 <-- SCF

12 -3.62520110E+004 1.51304423E-004 276.64 <-- SCF

13 -3.62520153E+004 1.07785288E-004 293.36 <-- SCF

14 -3.62520184E+004 7.55772050E-005 309.81 <-- SCF

15 -3.62520205E+004 5.33411224E-005 324.92 <-- SCF

16 -3.62520220E+004 3.71542284E-005 340.20 <-- SCF

17 -3.62520229E+004 2.35020778E-005 355.41 <-- SCF

18 -3.62520236E+004 1.67067601E-005 370.72 <-- SCF

19 -3.62520240E+004 1.13048493E-005 385.53 <-- SCF

20 -3.62520243E+004 7.52858921E-006 400.72 <-- SCF

21 -3.62520245E+004 4.55694836E-006 415.78 <-- SCF

22 -3.62520246E+004 2.06818106E-006 431.36 <-- SCF

23 -3.62520246E+004 1.30994241E-006 447.19 <-- SCF

24 -3.62520247E+004 1.85426397E-006 462.27 <-- SCF

25 -3.62520248E+004 9.94963132E-007 477.44 <-- SCF

26 -3.62520248E+004 9.52716635E-007 492.55 <-- SCF

------------------------------------------------------------------------ <-- SCF

Final energy = -36252.02480124 eV

(energy not corrected for finite basis set)

Calculating total energy with cut-off of 495.000eV.

------------------------------------------------------------------------ <-- SCF

SCF loop Energy Energy gain Timer <-- SCF

per atom (sec) <-- SCF

------------------------------------------------------------------------ <-- SCF

Initial -3.62520244E+004 498.89 <-- SCF

1 -3.62520344E+004 2.51613655E-004 526.27 <-- SCF

2 -3.62520347E+004 7.73555550E-006 545.80 <-- SCF

3 -3.62520336E+004 -2.86352909E-005 571.34 <-- SCF

4 -3.62520298E+004 -9.53823668E-005 596.02 <-- SCF

5 -3.62520300E+004 5.70035397E-006 614.83 <-- SCF

6 -3.62520300E+004 -8.18212732E-007 632.56 <-- SCF

7 -3.62520299E+004 -6.60317679E-007 648.98 <-- SCF

------------------------------------------------------------------------ <-- SCF

Final energy = -36252.02994502 eV

(energy not corrected for finite basis set)

Calculating total energy with cut-off of 500.000eV.

------------------------------------------------------------------------ <-- SCF

SCF loop Energy Energy gain Timer <-- SCF

per atom (sec) <-- SCF

------------------------------------------------------------------------ <-- SCF

Initial -3.62520298E+004 655.17 <-- SCF

1 -3.62520401E+004 2.58120005E-004 681.11 <-- SCF

2 -3.62520404E+004 7.99107083E-006 698.84 <-- SCF

3 -3.62520389E+004 -3.78625247E-005 722.52 <-- SCF

4 -3.62520346E+004 -1.06409229E-004 746.91 <-- SCF

5 -3.62520349E+004 6.77515890E-006 766.39 <-- SCF

6 -3.62520349E+004 -1.33452675E-006 782.83 <-- SCF

7 -3.62520348E+004 -5.95016614E-007 800.34 <-- SCF

------------------------------------------------------------------------ <-- SCF

Final energy = -36252.03482872 eV

(energy not corrected for finite basis set)

For future reference: finite basis dEtot/dlog(Ecut) = -0.495824eV

Total energy corrected for finite basis set = -36252.034869 eV

+---------------- MEMORY AND SCRATCH DISK ESTIMATES PER PROCESS --------------+

| Memory Disk |

| Model and support data 156.1 MB 111.0 MB |

| Electronic energy minimisation requirements 80.4 MB 0.0 MB |

| Geometry minimisation requirements 105.7 MB 0.0 MB |

| ----------------------------- |

| Approx. total storage required per process 342.2 MB 111.0 MB |

| |

| Requirements will fluctuate during execution and may exceed these estimates |

+-----------------------------------------------------------------------------+

*********************************** Forces ***********************************

* *

* Cartesian components (eV/A) *

* -------------------------------------------------------------------------- *

* x y z *

* *

* Se 1 -0.14682 -0.12229 2.27022 *

* Se 2 0.03823 0.25214 2.23537 *

* Se 3 0.03802 0.25226 -2.23674 *

* Se 4 -0.14668 -0.12236 -2.26911 *

* Se 5 -0.27952 0.06111 2.04337 *

* Se 6 0.00581 0.20452 2.26846 *

* Se 7 0.00628 0.20452 -2.26888 *

* Se 8 -0.28025 0.06120 -2.04229 *

* Se 9 0.40401 -0.25191 2.16124 *

* Se 10 -0.40631 0.25192 2.15990 *

* Se 11 -0.40624 0.25196 -2.16010 *

* Se 12 0.40399 -0.25204 -2.16117 *

* Se 13 -0.00646 -0.20452 2.26962 *

* Se 14 0.27990 -0.06127 2.04144 *

* Se 15 0.27938 -0.06115 -2.04151 *

* Se 16 -0.00698 -0.20438 -2.26967 *

* Se 17 -0.03700 -0.25204 2.23715 *

* Se 18 0.14879 0.12255 2.26837 *

* Se 19 0.14844 0.12229 -2.26895 *

* Se 20 -0.03638 -0.25210 -2.23661 *

* Nb 1 0.02595 0.00579 0.00240 *

* Nb 2 -0.02055 -0.00544 -0.00250 *

* Nb 3 0.00131 -0.00006 0.00184 *

* Nb 4 0.00382 0.00000 -0.00180 *

* Nb 5 0.03330 0.00697 0.00287 *

* Nb 6 -0.01500 -0.00538 -0.00263 *

* Nb 7 0.00591 0.00158 -0.00068 *

* Nb 8 0.00523 0.00151 0.00050 *

* Nb 9 0.03035 0.00480 0.00149 *

* Nb 10 -0.01982 -0.00735 -0.00139 *

* Nb 11 0.00168 0.00098 0.00252 *

* Nb 12 -0.00106 0.00074 -0.00274 *

* Nb 13 0.01548 0.00729 0.00016 *

* Nb 14 -0.03428 -0.00473 0.00005 *

* Nb 15 -0.00365 -0.00135 0.00075 *

* Nb 16 -0.00449 -0.00099 -0.00092 *

* Nb 17 0.01582 0.00557 0.00007 *

* Nb 18 -0.03201 -0.00708 -0.00048 *

* Nb 19 -0.00486 -0.00149 0.00457 *

* Nb 20 -0.00331 -0.00175 -0.00419 *

* *

******************************************************************************

***************** Stress Tensor *****************

* *

* Cartesian components (GPa) *

* --------------------------------------------- *

* x y z *

* *

* x -15.572091 -0.660980 0.001478 *

* y -0.660980 -14.193678 0.000441 *

* z 0.001478 0.000441 -32.095749 *

* *

* Pressure: 20.6205 *

* *

*************************************************

BFGS: finished iteration 0 with enthalpy= -3.62520349E+004 eV

+-----------+-----------------+-----------------+------------+-----+ <-- BFGS

| Parameter | value | tolerance | units | OK? | <-- BFGS

+-----------+-----------------+-----------------+------------+-----+ <-- BFGS

| dE/ion | 0.000000E+000 | 5.000000E-006 | eV | No | <-- BFGS

| |F|max | 2.278863E+000 | 1.000000E-002 | eV/A | No | <-- BFGS

| |dR|max | 0.000000E+000 | 5.000000E-004 | A | No | <-- BFGS

| Smax | 3.209575E+001 | 2.000000E-002 | GPa | No | <-- BFGS

+-----------+-----------------+-----------------+------------+-----+ <-- BFGS

================================================================================

Starting BFGS iteration 1 ...

================================================================================

+------------+-------------+-------------+-----------------+ <-- min BFGS

| Step | lambda | F.delta | enthalpy | <-- min BFGS

+------------+-------------+-------------+-----------------+ <-- min BFGS

| previous | 0.000000 | 0.150021 | -36252.034869 | <-- min BFGS

+------------+-------------+-------------+-----------------+ <-- min BFGS

--------------------------------------------------------------------------------

BFGS: starting iteration 1 with trial guess (lambda= 0.983723)

--------------------------------------------------------------------------------

+---------------- MEMORY AND SCRATCH DISK ESTIMATES PER PROCESS --------------+

| Memory Disk |

| Model and support data 160.1 MB 111.0 MB |

| Electronic energy minimisation requirements 83.5 MB 0.0 MB |

| Geometry minimisation requirements 109.9 MB 0.0 MB |

| ----------------------------- |

| Approx. total storage required per process 353.6 MB 111.0 MB |

| |

| Requirements will fluctuate during execution and may exceed these estimates |

+-----------------------------------------------------------------------------+

-------------------------------

Unit Cell

-------------------------------

Real Lattice(A) Reciprocal Lattice(1/A)

15.0768289 -8.6925060 -0.0000120 0.4166413 -0.0001789 0.0000004

0.0014944 3.4795908 -0.0000010 1.0408285 1.8052783 0.0000015

-0.0000122 -0.0000036 12.8347886 0.0000005 0.0000001 0.4895433

Lattice parameters(A) Cell Angles

a = 17.403173 alpha = 90.000033

b = 3.479591 beta = 90.000078

c = 12.834789 gamma = 119.940878

Current cell volume = 673.495078 A**3

-------------------------------

Cell Contents

-------------------------------

xxxxxxxxxxxxxxxxxxxxxxxxxxxxxxxxxxxxxxxxxxxxxxxxxxxxxxxxxxxx

x Element Atom Fractional coordinates of atoms x

x Number u v w x

x----------------------------------------------------------x

x Se 1 0.066656 0.666599 0.117502 x

x Se 2 0.133336 0.333422 0.617499 x

x Se 3 0.133336 0.333422 0.882501 x

x Se 4 0.066656 0.666599 0.382498 x

x Se 5 0.266646 0.666634 0.117482 x

x Se 6 0.333334 0.333401 0.617502 x

x Se 7 0.333334 0.333401 0.882498 x

x Se 8 0.266646 0.666634 0.382518 x

x Se 9 0.466697 0.666661 0.117492 x

x Se 10 0.533303 0.333339 0.617492 x

x Se 11 0.533303 0.333339 0.882508 x

x Se 12 0.466697 0.666661 0.382508 x

x Se 13 0.666666 0.666599 0.117502 x

x Se 14 0.733354 0.333366 0.617482 x

x Se 15 0.733354 0.333366 0.882518 x

x Se 16 0.666666 0.666599 0.382498 x

x Se 17 0.866664 0.666578 0.117499 x

x Se 18 0.933344 0.333401 0.617502 x

x Se 19 0.933344 0.333401 0.882498 x

x Se 20 0.866664 0.666578 0.382501 x

x Nb 1 0.000002 0.000007 0.250000 x

x Nb 2 -0.000002 -0.000006 0.750000 x

x Nb 3 0.000000 0.000000 0.000000 x

x Nb 4 0.000000 0.000001 0.500000 x

x Nb 5 0.200002 0.000009 0.250000 x

x Nb 6 0.199999 -0.000005 0.750000 x

x Nb 7 0.200000 0.000002 -0.000000 x

x Nb 8 0.200000 0.000001 0.500000 x

x Nb 9 0.400002 0.000007 0.250000 x

x Nb 10 0.399999 -0.000006 0.750000 x

x Nb 11 0.400000 0.000001 0.000000 x

x Nb 12 0.400000 0.000000 0.500000 x

x Nb 13 0.600001 0.000005 0.250000 x

x Nb 14 0.599997 -0.000008 0.750000 x

x Nb 15 0.600000 -0.000001 0.000000 x

x Nb 16 0.600000 -0.000001 0.500000 x

x Nb 17 0.800001 0.000005 0.250000 x

x Nb 18 0.799998 -0.000008 0.750000 x

x Nb 19 0.800000 -0.000001 0.000000 x

x Nb 20 0.800000 -0.000001 0.500000 x

xxxxxxxxxxxxxxxxxxxxxxxxxxxxxxxxxxxxxxxxxxxxxxxxxxxxxxxxxxxx

------------------------------------------------------------------------ <-- SCF

SCF loop Energy Energy gain Timer <-- SCF

per atom (sec) <-- SCF

------------------------------------------------------------------------ <-- SCF

Initial -3.62463235E+004 892.09 <-- SCF

1 -3.62606565E+004 3.58324137E-001 915.98 <-- SCF

2 -3.62609162E+004 6.49171644E-003 948.22 <-- SCF

3 -3.62556475E+004 -1.31717263E-001 974.83 <-- SCF

4 -3.62552697E+004 -9.44390839E-003 1001.36 <-- SCF

5 -3.62552265E+004 -1.08088207E-003 1028.27 <-- SCF

6 -3.62552280E+004 3.65581928E-005 1057.84 <-- SCF

7 -3.62552271E+004 -2.11502987E-005 1079.81 <-- SCF

8 -3.62552272E+004 2.15157336E-006 1098.14 <-- SCF

9 -3.62552272E+004 -6.50088923E-007 1116.05 <-- SCF

10 -3.62552272E+004 8.84137926E-008 1132.48 <-- SCF

------------------------------------------------------------------------ <-- SCF

Final energy = -36255.22718083 eV

(energy not corrected for finite basis set)

*********************************** Forces ***********************************

* *

* Cartesian components (eV/A) *

* -------------------------------------------------------------------------- *

* x y z *

* *

* Se 1 -0.19331 -0.08186 1.91883 *

* Se 2 0.05459 0.28606 1.94014 *

* Se 3 0.05423 0.28608 -1.94001 *

* Se 4 -0.19315 -0.08186 -1.91927 *

* Se 5 -0.27021 0.10535 1.79503 *

* Se 6 -0.03972 0.23625 1.91814 *

* Se 7 -0.03968 0.23620 -1.91787 *

* Se 8 -0.27053 0.10535 -1.79504 *

* Se 9 0.43558 -0.30623 1.85835 *

* Se 10 -0.43728 0.30611 1.85868 *

* Se 11 -0.43709 0.30610 -1.85832 *

* Se 12 0.43554 -0.30629 -1.85873 *

* Se 13 0.03877 -0.23629 1.91765 *

* Se 14 0.26988 -0.10544 1.79527 *

* Se 15 0.26994 -0.10539 -1.79477 *

* Se 16 0.03866 -0.23625 -1.91805 *

* Se 17 -0.05293 -0.28600 1.93971 *

* Se 18 0.19490 0.08197 1.91941 *

* Se 19 0.19495 0.08189 -1.91870 *

* Se 20 -0.05297 -0.28603 -1.94018 *

* Nb 1 0.01015 0.00231 -0.00043 *

* Nb 2 -0.00834 -0.00226 0.00050 *

* Nb 3 0.00111 -0.00011 -0.00105 *

* Nb 4 0.00104 -0.00016 0.00087 *

* Nb 5 0.02374 0.00276 -0.00039 *

* Nb 6 0.00219 -0.00388 0.00044 *

* Nb 7 0.00867 0.00151 -0.00429 *

* Nb 8 0.00889 0.00151 0.00428 *

* Nb 9 0.02389 -0.00108 -0.00034 *

* Nb 10 -0.00381 -0.00562 0.00018 *

* Nb 11 0.00404 -0.00266 0.00320 *

* Nb 12 0.00419 -0.00273 -0.00305 *

* Nb 13 0.00201 0.00561 -0.00009 *

* Nb 14 -0.02496 0.00132 0.00013 *

* Nb 15 -0.00584 0.00277 -0.00356 *

* Nb 16 -0.00577 0.00292 0.00346 *

* Nb 17 -0.00205 0.00372 -0.00023 *

* Nb 18 -0.02288 -0.00260 0.00027 *

* Nb 19 -0.00809 -0.00148 0.00284 *

* Nb 20 -0.00836 -0.00157 -0.00298 *

* *

******************************************************************************

***************** Stress Tensor *****************

* *

* Cartesian components (GPa) *

* --------------------------------------------- *

* x y z *

* *

* x -7.740805 -0.431154 -0.000213 *

* y -0.431154 -6.450616 0.000046 *

* z -0.000213 0.000046 -19.963661 *

* *

* Pressure: 11.3850 *

* *

*************************************************

+------------+-------------+-------------+-----------------+ <-- min BFGS

| Step | lambda | F.delta | enthalpy | <-- min BFGS

+------------+-------------+-------------+-----------------+ <-- min BFGS

| previous | 0.000000 | 0.150021 | -36252.034869 | <-- min BFGS

| trial step | 0.983723 | 0.089940 | -36255.227097 | <-- min BFGS

+------------+-------------+-------------+-----------------+ <-- min BFGS

--------------------------------------------------------------------------------

BFGS: improving iteration 1 with line minimization (lambda= 1.475584)

--------------------------------------------------------------------------------

+---------------- MEMORY AND SCRATCH DISK ESTIMATES PER PROCESS --------------+

| Memory Disk |

| Model and support data 161.9 MB 111.0 MB |

| Electronic energy minimisation requirements 85.0 MB 0.0 MB |

| Geometry minimisation requirements 111.9 MB 0.0 MB |

| ----------------------------- |

| Approx. total storage required per process 358.8 MB 111.0 MB |

| |

| Requirements will fluctuate during execution and may exceed these estimates |

+-----------------------------------------------------------------------------+

-------------------------------

Unit Cell

-------------------------------

Real Lattice(A) Reciprocal Lattice(1/A)

15.1511869 -8.7293840 -0.0000180 0.4145461 -0.0002658 0.0000006

0.0022416 3.4956362 -0.0000015 1.0352140 1.7967730 0.0000022

-0.0000183 -0.0000055 12.9670829 0.0000007 0.0000002 0.4845489

Lattice parameters(A) Cell Angles

a = 17.486012 alpha = 90.000049

b = 3.495637 beta = 90.000117

c = 12.967083 gamma = 119.911732

Current cell volume = 687.029840 A**3

-------------------------------

Cell Contents

-------------------------------

xxxxxxxxxxxxxxxxxxxxxxxxxxxxxxxxxxxxxxxxxxxxxxxxxxxxxxxxxxxx

x Element Atom Fractional coordinates of atoms x

x Number u v w x

x----------------------------------------------------------x

x Se 1 0.066650 0.666566 0.117603 x

x Se 2 0.133338 0.333467 0.617599 x

x Se 3 0.133338 0.333467 0.882401 x

x Se 4 0.066650 0.666566 0.382397 x

x Se 5 0.266635 0.666618 0.117573 x

x Se 6 0.333334 0.333435 0.617603 x

x Se 7 0.333334 0.333435 0.882397 x

x Se 8 0.266635 0.666618 0.382427 x

x Se 9 0.466712 0.666658 0.117589 x

x Se 10 0.533288 0.333342 0.617588 x

x Se 11 0.533288 0.333342 0.882412 x

x Se 12 0.466712 0.666658 0.382411 x

x Se 13 0.666666 0.666565 0.117603 x

x Se 14 0.733365 0.333382 0.617573 x

x Se 15 0.733365 0.333382 0.882427 x

x Se 16 0.666666 0.666565 0.382397 x

x Se 17 0.866663 0.666534 0.117599 x

x Se 18 0.933350 0.333435 0.617603 x

x Se 19 0.933350 0.333435 0.882397 x

x Se 20 0.866663 0.666534 0.382401 x

x Nb 1 0.000003 0.000010 0.250000 x

x Nb 2 -0.000002 -0.000008 0.750000 x

x Nb 3 0.000000 0.000000 0.000000 x

x Nb 4 0.000000 0.000001 0.500000 x

x Nb 5 0.200004 0.000013 0.250000 x

x Nb 6 0.199998 -0.000007 0.750000 x

x Nb 7 0.200001 0.000002 -0.000000 x

x Nb 8 0.200001 0.000002 0.500000 x

x Nb 9 0.400003 0.000011 0.250000 x

x Nb 10 0.399998 -0.000009 0.750000 x

x Nb 11 0.400000 0.000001 0.000000 x

x Nb 12 0.400000 0.000000 0.500000 x

x Nb 13 0.600002 0.000008 0.250000 x

x Nb 14 0.599996 -0.000012 0.750000 x

x Nb 15 0.600000 -0.000002 0.000000 x

x Nb 16 0.599999 -0.000002 0.500000 x

x Nb 17 0.800002 0.000007 0.250000 x

x Nb 18 0.799996 -0.000012 0.750000 x

x Nb 19 0.799999 -0.000002 0.000001 x

x Nb 20 0.800000 -0.000002 0.499999 x

xxxxxxxxxxxxxxxxxxxxxxxxxxxxxxxxxxxxxxxxxxxxxxxxxxxxxxxxxxxx

------------------------------------------------------------------------ <-- SCF

SCF loop Energy Energy gain Timer <-- SCF

per atom (sec) <-- SCF

------------------------------------------------------------------------ <-- SCF

Initial -3.62540698E+004 1225.66 <-- SCF

1 -3.62575822E+004 8.78096653E-002 1250.67 <-- SCF

2 -3.62576457E+004 1.58909491E-003 1279.38 <-- SCF

3 -3.62563518E+004 -3.23488092E-002 1305.12 <-- SCF

4 -3.62562603E+004 -2.28629717E-003 1330.52 <-- SCF

5 -3.62562504E+004 -2.48500929E-004 1357.98 <-- SCF

6 -3.62562506E+004 5.42674787E-006 1382.72 <-- SCF

7 -3.62562503E+004 -7.52943654E-006 1403.53 <-- SCF

8 -3.62562503E+004 6.79095378E-007 1421.55 <-- SCF

9 -3.62562503E+004 -1.80221548E-007 1438.64 <-- SCF

------------------------------------------------------------------------ <-- SCF

Final energy = -36256.25032761 eV

(energy not corrected for finite basis set)

*********************************** Forces ***********************************

* *

* Cartesian components (eV/A) *

* -------------------------------------------------------------------------- *

* x y z *

* *

* Se 1 -0.22897 -0.07129 1.76268 *

* Se 2 0.08606 0.29618 1.80524 *

* Se 3 0.08593 0.29616 -1.80500 *

* Se 4 -0.22899 -0.07130 -1.76302 *

* Se 5 -0.23588 0.11360 1.71762 *

* Se 6 -0.05927 0.27175 1.77937 *

* Se 7 -0.05952 0.27178 -1.77931 *

* Se 8 -0.23582 0.11360 -1.71782 *

* Se 9 0.41724 -0.31110 1.73080 *

* Se 10 -0.41859 0.31115 1.73078 *

* Se 11 -0.41865 0.31112 -1.73094 *

* Se 12 0.41733 -0.31114 -1.73074 *

* Se 13 0.05898 -0.27184 1.77921 *

* Se 14 0.23539 -0.11354 1.71795 *

* Se 15 0.23547 -0.11351 -1.71809 *

* Se 16 0.05890 -0.27183 -1.77902 *

* Se 17 -0.08480 -0.29623 1.80499 *

* Se 18 0.23018 0.07141 1.76309 *

* Se 19 0.23038 0.07136 -1.76291 *

* Se 20 -0.08498 -0.29629 -1.80497 *

* Nb 1 0.00429 0.00006 -0.00025 *

* Nb 2 -0.00291 0.00013 0.00028 *

* Nb 3 0.00072 0.00005 -0.00030 *

* Nb 4 0.00044 0.00002 0.00026 *

* Nb 5 0.02205 -0.00031 -0.00027 *

* Nb 6 0.01064 -0.00194 0.00033 *

* Nb 7 0.01119 0.00127 -0.00355 *

* Nb 8 0.01148 0.00131 0.00356 *

* Nb 9 0.02217 -0.00523 -0.00010 *

* Nb 10 0.00382 -0.00405 0.00008 *

* Nb 11 0.00692 -0.00426 0.00439 *

* Nb 12 0.00724 -0.00425 -0.00433 *

* Nb 13 -0.00536 0.00389 0.00001 *

* Nb 14 -0.02274 0.00502 -0.00006 *

* Nb 15 -0.00814 0.00416 -0.00452 *

* Nb 16 -0.00810 0.00414 0.00458 *

* Nb 17 -0.01088 0.00209 -0.00010 *

* Nb 18 -0.02107 0.00032 0.00006 *

* Nb 19 -0.01088 -0.00120 0.00314 *

* Nb 20 -0.01128 -0.00125 -0.00314 *

* *

******************************************************************************

***************** Stress Tensor *****************

* *

* Cartesian components (GPa) *

* --------------------------------------------- *

* x y z *

* *

* x -4.397851 -0.332750 -0.000497 *

* y -0.332750 -3.163671 -0.000268 *

* z -0.000497 -0.000268 -14.705019 *

* *

* Pressure: 7.4222 *

* *

*************************************************

+------------+-------------+-------------+-----------------+ <-- min BFGS

| Step | lambda | F.delta | enthalpy | <-- min BFGS

+------------+-------------+-------------+-----------------+ <-- min BFGS

| previous | 0.000000 | 0.150021 | -36252.034869 | <-- min BFGS

| trial step | 0.983723 | 0.089940 | -36255.227097 | <-- min BFGS

| line step | 1.475584 | 0.063267 | -36256.250287 | <-- min BFGS

+------------+-------------+-------------+-----------------+ <-- min BFGS

BFGS: finished iteration 1 with enthalpy= -3.62562503E+004 eV

+-----------+-----------------+-----------------+------------+-----+ <-- BFGS

| Parameter | value | tolerance | units | OK? | <-- BFGS

+-----------+-----------------+-----------------+------------+-----+ <-- BFGS

| dE/ion | 1.053855E-001 | 5.000000E-006 | eV | No | <-- BFGS

| |F|max | 1.831398E+000 | 1.000000E-002 | eV/A | No | <-- BFGS

| |dR|max | 3.945706E-003 | 5.000000E-004 | A | No | <-- BFGS

| Smax | 1.470502E+001 | 2.000000E-002 | GPa | No | <-- BFGS

+-----------+-----------------+-----------------+------------+-----+ <-- BFGS

================================================================================

Starting BFGS iteration 2 ...

================================================================================

+------------+-------------+-------------+-----------------+ <-- min BFGS

| Step | lambda | F.delta | enthalpy | <-- min BFGS

+------------+-------------+-------------+-----------------+ <-- min BFGS

| previous | 0.000000 | 0.074199 | -36256.250287 | <-- min BFGS

+------------+-------------+-------------+-----------------+ <-- min BFGS

--------------------------------------------------------------------------------

BFGS: starting iteration 2 with trial guess (lambda= 0.817549)

--------------------------------------------------------------------------------

+---------------- MEMORY AND SCRATCH DISK ESTIMATES PER PROCESS --------------+

| Memory Disk |

| Model and support data 163.3 MB 118.8 MB |

| Electronic energy minimisation requirements 88.1 MB 0.0 MB |

| Geometry minimisation requirements 115.9 MB 0.0 MB |

| ----------------------------- |

| Approx. total storage required per process 367.2 MB 118.8 MB |

| |

| Requirements will fluctuate during execution and may exceed these estimates |

+-----------------------------------------------------------------------------+

-------------------------------

Unit Cell

-------------------------------

Real Lattice(A) Reciprocal Lattice(1/A)

15.2610049 -8.7751910 -0.0000165 0.4114563 -0.0004500 0.0000005

0.0038459 3.5167397 -0.0000009 1.0266918 1.7855279 0.0000017

-0.0000161 -0.0000033 13.2316715 0.0000006 0.0000001 0.4748595

Lattice parameters(A) Cell Angles

a = 17.604041 alpha = 90.000029

b = 3.516742 beta = 90.000107

c = 13.231672 gamma = 119.836563

Current cell volume = 710.576885 A**3

-------------------------------

Cell Contents

-------------------------------

xxxxxxxxxxxxxxxxxxxxxxxxxxxxxxxxxxxxxxxxxxxxxxxxxxxxxxxxxxxx

x Element Atom Fractional coordinates of atoms x

x Number u v w x

x----------------------------------------------------------x

x Se 1 0.066622 0.666448 0.117901 x

x Se 2 0.133348 0.333659 0.617901 x

x Se 3 0.133348 0.333659 0.882099 x

x Se 4 0.066622 0.666448 0.382099 x

x Se 5 0.266603 0.666597 0.117858 x

x Se 6 0.333328 0.333569 0.617903 x

x Se 7 0.333328 0.333569 0.882097 x

x Se 8 0.266603 0.666596 0.382142 x

x Se 9 0.466767 0.666623 0.117879 x

x Se 10 0.533232 0.333376 0.617879 x

x Se 11 0.533232 0.333376 0.882121 x

x Se 12 0.466767 0.666623 0.382121 x

x Se 13 0.666672 0.666431 0.117903 x

x Se 14 0.733397 0.333403 0.617858 x

x Se 15 0.733397 0.333403 0.882142 x

x Se 16 0.666672 0.666431 0.382097 x

x Se 17 0.866652 0.666342 0.117901 x

x Se 18 0.933379 0.333553 0.617901 x

x Se 19 0.933379 0.333553 0.882099 x

x Se 20 0.866652 0.666342 0.382099 x

x Nb 1 0.000004 0.000013 0.250000 x

x Nb 2 -0.000003 -0.000011 0.750000 x

x Nb 3 0.000000 0.000001 0.000000 x

x Nb 4 0.000001 0.000001 0.500000 x

x Nb 5 0.200007 0.000021 0.250000 x

x Nb 6 0.199999 -0.000006 0.750000 x

x Nb 7 0.200002 0.000007 -0.000001 x

x Nb 8 0.200002 0.000006 0.500001 x

x Nb 9 0.400007 0.000017 0.250000 x

x Nb 10 0.399998 -0.000012 0.750000 x

x Nb 11 0.400001 0.000001 0.000001 x

x Nb 12 0.400001 0.000000 0.499999 x

x Nb 13 0.600002 0.000010 0.250000 x

x Nb 14 0.599993 -0.000018 0.750000 x

x Nb 15 0.599999 -0.000002 -0.000000 x

x Nb 16 0.599999 -0.000002 0.500000 x

x Nb 17 0.800001 0.000007 0.250000 x

x Nb 18 0.799993 -0.000021 0.750000 x

x Nb 19 0.799998 -0.000006 0.000001 x

x Nb 20 0.799998 -0.000006 0.499999 x

xxxxxxxxxxxxxxxxxxxxxxxxxxxxxxxxxxxxxxxxxxxxxxxxxxxxxxxxxxxx

------------------------------------------------------------------------ <-- SCF

SCF loop Energy Energy gain Timer <-- SCF

per atom (sec) <-- SCF

------------------------------------------------------------------------ <-- SCF

Initial -3.62503772E+004 1532.56 <-- SCF

1 -3.62612520E+004 2.71871289E-001 1559.03 <-- SCF

2 -3.62615723E+004 8.00653631E-003 1594.31 <-- SCF

3 -3.62579881E+004 -8.96040387E-002 1623.14 <-- SCF

4 -3.62574207E+004 -1.41860227E-002 1650.64 <-- SCF

5 -3.62572269E+004 -4.84416355E-003 1678.53 <-- SCF

6 -3.62572266E+004 -8.40830425E-006 1707.70 <-- SCF

7 -3.62572257E+004 -2.14593182E-005 1732.25 <-- SCF

8 -3.62572258E+004 2.06299066E-006 1756.16 <-- SCF

9 -3.62572256E+004 -4.45284101E-006 1776.48 <-- SCF

10 -3.62572256E+004 -1.11537812E-007 1794.45 <-- SCF

11 -3.62572256E+004 1.32453945E-007 1811.53 <-- SCF

------------------------------------------------------------------------ <-- SCF

Final energy = -36257.22561082 eV

(energy not corrected for finite basis set)

*********************************** Forces ***********************************

* *

* Cartesian components (eV/A) *

* -------------------------------------------------------------------------- *

* x y z *

* *

* Se 1 0.06059 -0.00205 1.54829 *

* Se 2 -0.06168 0.00270 1.39965 *

* Se 3 -0.06049 0.00187 -1.54915 *

* Se 4 0.06166 -0.00310 -1.39867 *

* Se 5 0.06089 -0.00269 1.55658 *

* Se 6 -0.06131 0.00205 1.39673 *

* Se 7 -0.05994 0.00112 -1.54656 *

* Se 8 0.06251 -0.00446 -1.41128 *

* Se 9 0.05453 -0.00167 1.55313 *

* Se 10 -0.05547 0.00231 1.40674 *

* Se 11 -0.05455 0.00168 -1.55314 *

* Se 12 0.05539 -0.00230 -1.40667 *

* Se 13 0.05997 -0.00113 1.54652 *

* Se 14 -0.06256 0.00445 1.41124 *

* Se 15 -0.06092 0.00268 -1.55652 *

* Se 16 0.06130 -0.00204 -1.39669 *

* Se 17 0.06052 -0.00187 1.54920 *

* Se 18 -0.06158 0.00309 1.39857 *

* Se 19 -0.06056 0.00205 -1.54821 *

* Se 20 0.06177 -0.00272 -1.39971 *

* Nb 1 -0.00635 -0.00591 0.00912 *

* Nb 2 0.00606 0.00595 -0.00911 *

* Nb 3 -0.00011 0.00000 -0.00009 *

* Nb 4 -0.00014 0.00002 0.00008 *

* Nb 5 -0.00664 -0.00020 0.00904 *

* Nb 6 0.00384 0.01024 -0.00908 *

* Nb 7 -0.00490 0.00656 -0.00113 *

* Nb 8 -0.00490 0.00653 0.00108 *

* Nb 9 -0.00100 -0.00848 0.00902 *

* Nb 10 -0.00345 0.00931 -0.00902 *

* Nb 11 -0.00627 -0.00056 0.00622 *

* Nb 12 -0.00621 -0.00060 -0.00615 *

* Nb 13 0.00369 -0.00934 0.00901 *

* Nb 14 0.00123 0.00844 -0.00904 *

* Nb 15 0.00642 0.00055 -0.00624 *

* Nb 16 0.00641 0.00058 0.00617 *

* Nb 17 -0.00398 -0.01022 0.00911 *

* Nb 18 0.00657 0.00020 -0.00907 *

* Nb 19 0.00483 -0.00654 0.00101 *

* Nb 20 0.00482 -0.00651 -0.00097 *

* *

******************************************************************************

***************** Stress Tensor *****************

* *

* Cartesian components (GPa) *

* --------------------------------------------- *

* x y z *

* *

* x 0.633783 -0.195035 -0.000800 *

* y -0.195035 1.701546 0.004026 *

* z -0.000800 0.004026 -6.511310 *

* *

* Pressure: 1.3920 *

* *

*************************************************

+------------+-------------+-------------+-----------------+ <-- min BFGS

| Step | lambda | F.delta | enthalpy | <-- min BFGS

+------------+-------------+-------------+-----------------+ <-- min BFGS

| previous | 0.000000 | 0.074199 | -36256.250287 | <-- min BFGS

| trial step | 0.817549 | 0.028197 | -36257.225607 | <-- min BFGS

+------------+-------------+-------------+-----------------+ <-- min BFGS

--------------------------------------------------------------------------------

BFGS: improving iteration 2 with line minimization (lambda= 1.226323)

--------------------------------------------------------------------------------

+---------------- MEMORY AND SCRATCH DISK ESTIMATES PER PROCESS --------------+

| Memory Disk |

| Model and support data 165.1 MB 118.8 MB |

| Electronic energy minimisation requirements 89.5 MB 0.0 MB |

| Geometry minimisation requirements 117.7 MB 0.0 MB |

| ----------------------------- |

| Approx. total storage required per process 372.2 MB 118.8 MB |

| |

| Requirements will fluctuate during execution and may exceed these estimates |

+-----------------------------------------------------------------------------+

-------------------------------

Unit Cell

-------------------------------

Real Lattice(A) Reciprocal Lattice(1/A)

15.3159140 -8.7980945 -0.0000158 0.4099287 -0.0005402 0.0000005

0.0046480 3.5272914 -0.0000006 1.0224819 1.7799586 0.0000014

-0.0000150 -0.0000023 13.3639658 0.0000005 0.0000001 0.4701587

Lattice parameters(A) Cell Angles

a = 17.663060 alpha = 90.000019

b = 3.527294 beta = 90.000102

c = 13.363966 gamma = 119.799341

Current cell volume = 722.517275 A**3

-------------------------------

Cell Contents

-------------------------------

xxxxxxxxxxxxxxxxxxxxxxxxxxxxxxxxxxxxxxxxxxxxxxxxxxxxxxxxxxxx

x Element Atom Fractional coordinates of atoms x

x Number u v w x

x----------------------------------------------------------x

x Se 1 0.066607 0.666389 0.118050 x

x Se 2 0.133353 0.333755 0.618052 x

x Se 3 0.133353 0.333755 0.881948 x

x Se 4 0.066607 0.666389 0.381950 x

x Se 5 0.266586 0.666586 0.118001 x

x Se 6 0.333325 0.333636 0.618053 x

x Se 7 0.333325 0.333636 0.881947 x

x Se 8 0.266586 0.666586 0.381999 x

x Se 9 0.466795 0.666605 0.118024 x

x Se 10 0.533204 0.333393 0.618024 x

x Se 11 0.533204 0.333393 0.881976 x

x Se 12 0.466795 0.666605 0.381976 x

x Se 13 0.666675 0.666364 0.118053 x

x Se 14 0.733414 0.333414 0.618001 x

x Se 15 0.733413 0.333414 0.881999 x

x Se 16 0.666675 0.666364 0.381947 x

x Se 17 0.866647 0.666246 0.118052 x

x Se 18 0.933393 0.333613 0.618050 x

x Se 19 0.933393 0.333612 0.881950 x

x Se 20 0.866647 0.666246 0.381948 x

x Nb 1 0.000005 0.000015 0.250000 x

x Nb 2 -0.000004 -0.000012 0.750000 x

x Nb 3 0.000000 0.000001 0.000000 x

x Nb 4 0.000001 0.000002 0.500000 x

x Nb 5 0.200009 0.000026 0.250000 x

x Nb 6 0.200000 -0.000006 0.750000 x

x Nb 7 0.200003 0.000009 -0.000001 x

x Nb 8 0.200003 0.000009 0.500001 x

x Nb 9 0.400008 0.000020 0.250000 x

x Nb 10 0.399998 -0.000013 0.750000 x

x Nb 11 0.400001 0.000001 0.000001 x

x Nb 12 0.400001 0.000000 0.499999 x

x Nb 13 0.600001 0.000011 0.250000 x

x Nb 14 0.599991 -0.000022 0.750000 x

x Nb 15 0.599998 -0.000003 -0.000001 x

x Nb 16 0.599998 -0.000003 0.500001 x

x Nb 17 0.800001 0.000006 0.250000 x

x Nb 18 0.799992 -0.000025 0.750000 x

x Nb 19 0.799997 -0.000008 0.000001 x

x Nb 20 0.799998 -0.000008 0.499999 x

xxxxxxxxxxxxxxxxxxxxxxxxxxxxxxxxxxxxxxxxxxxxxxxxxxxxxxxxxxxx

------------------------------------------------------------------------ <-- SCF

SCF loop Energy Energy gain Timer <-- SCF

per atom (sec) <-- SCF

------------------------------------------------------------------------ <-- SCF

Initial -3.62557415E+004 1911.38 <-- SCF

1 -3.62584008E+004 6.64820934E-002 1937.69 <-- SCF

2 -3.62584759E+004 1.87729098E-003 1970.09 <-- SCF

3 -3.62575919E+004 -2.20996303E-002 2000.75 <-- SCF

4 -3.62574684E+004 -3.08696311E-003 2029.22 <-- SCF

5 -3.62574191E+004 -1.23373422E-003 2057.81 <-- SCF

6 -3.62574191E+004 1.59042460E-006 2088.25 <-- SCF

7 -3.62574189E+004 -5.21549590E-006 2110.17 <-- SCF

8 -3.62574190E+004 5.59287199E-007 2132.19 <-- SCF

9 -3.62574189E+004 -8.39037759E-007 2150.33 <-- SCF

------------------------------------------------------------------------ <-- SCF

Final energy = -36257.41892970 eV

(energy not corrected for finite basis set)

*********************************** Forces ***********************************

* *

* Cartesian components (eV/A) *

* -------------------------------------------------------------------------- *

* x y z *

* *

* Se 1 0.05792 -0.00021 1.39907 *

* Se 2 -0.06011 0.00556 1.21976 *

* Se 3 -0.06065 0.00151 -1.39980 *

* Se 4 0.05559 -0.00203 -1.21857 *

* Se 5 0.05840 0.00032 1.40577 *

* Se 6 -0.06238 0.00389 1.21528 *

* Se 7 -0.06152 0.00033 -1.39559 *

* Se 8 0.05564 0.00050 -1.23060 *

* Se 9 0.05618 -0.00178 1.40281 *

* Se 10 -0.06273 0.00513 1.22774 *

* Se 11 -0.05634 0.00179 -1.40281 *

* Se 12 0.06251 -0.00513 -1.22767 *

* Se 13 0.06147 -0.00033 1.39561 *

* Se 14 -0.05571 -0.00051 1.23058 *

* Se 15 -0.05847 -0.00032 -1.40575 *

* Se 16 0.06229 -0.00388 -1.21528 *

* Se 17 0.06079 -0.00151 1.39986 *

* Se 18 -0.05538 0.00203 1.21849 *

* Se 19 -0.05777 0.00021 -1.39902 *

* Se 20 0.06030 -0.00558 -1.21981 *

* Nb 1 -0.01143 -0.00979 0.01451 *

* Nb 2 0.01123 0.00981 -0.01451 *

* Nb 3 -0.00002 0.00001 -0.00007 *

* Nb 4 -0.00005 0.00002 0.00008 *

* Nb 5 -0.01187 -0.00282 0.01451 *

* Nb 6 0.00734 0.01540 -0.01458 *

* Nb 7 -0.00643 0.00805 -0.00090 *

* Nb 8 -0.00633 0.00803 0.00092 *

* Nb 9 -0.00536 -0.01314 0.01466 *

* Nb 10 -0.00016 0.01450 -0.01464 *

* Nb 11 -0.00712 -0.00060 0.00841 *

* Nb 12 -0.00697 -0.00061 -0.00847 *

* Nb 13 0.00032 -0.01453 0.01465 *

* Nb 14 0.00551 0.01313 -0.01471 *

* Nb 15 0.00713 0.00060 -0.00843 *

* Nb 16 0.00704 0.00058 0.00846 *

* Nb 17 -0.00742 -0.01540 0.01463 *

* Nb 18 0.01183 0.00283 -0.01457 *

* Nb 19 0.00642 -0.00804 0.00080 *

* Nb 20 0.00630 -0.00801 -0.00083 *

* *

******************************************************************************

***************** Stress Tensor *****************

* *

* Cartesian components (GPa) *

* --------------------------------------------- *

* x y z *

* *

* x 2.791298 -0.107378 -0.001013 *

* y -0.107378 3.797909 0.004194 *

* z -0.001013 0.004194 -2.764621 *

* *

* Pressure: -1.2749 *

* *

*************************************************

+------------+-------------+-------------+-----------------+ <-- min BFGS

| Step | lambda | F.delta | enthalpy | <-- min BFGS

+------------+-------------+-------------+-----------------+ <-- min BFGS

| previous | 0.000000 | 0.074199 | -36256.250287 | <-- min BFGS

| trial step | 0.817549 | 0.028197 | -36257.225607 | <-- min BFGS

| line step | 1.226323 | 0.006958 | -36257.418929 | <-- min BFGS

+------------+-------------+-------------+-----------------+ <-- min BFGS

BFGS: finished iteration 2 with enthalpy= -3.62574189E+004 eV

+-----------+-----------------+-----------------+------------+-----+ <-- BFGS

| Parameter | value | tolerance | units | OK? | <-- BFGS

+-----------+-----------------+-----------------+------------+-----+ <-- BFGS

| dE/ion | 2.921604E-002 | 5.000000E-006 | eV | No | <-- BFGS

| |F|max | 1.406982E+000 | 1.000000E-002 | eV/A | No | <-- BFGS

| |dR|max | 6.130069E-003 | 5.000000E-004 | A | No | <-- BFGS

| Smax | 3.797909E+000 | 2.000000E-002 | GPa | No | <-- BFGS

+-----------+-----------------+-----------------+------------+-----+ <-- BFGS

================================================================================

Starting BFGS iteration 3 ...

================================================================================

+------------+-------------+-------------+-----------------+ <-- min BFGS

| Step | lambda | F.delta | enthalpy | <-- min BFGS

+------------+-------------+-------------+-----------------+ <-- min BFGS

| previous | 0.000000 | 0.006419 | -36257.418929 | <-- min BFGS

+------------+-------------+-------------+-----------------+ <-- min BFGS

--------------------------------------------------------------------------------

BFGS: starting iteration 3 with trial guess (lambda= 1.000000)

--------------------------------------------------------------------------------

+---------------- MEMORY AND SCRATCH DISK ESTIMATES PER PROCESS --------------+

| Memory Disk |

| Model and support data 165.3 MB 118.8 MB |

| Electronic energy minimisation requirements 89.7 MB 0.0 MB |

| Geometry minimisation requirements 118.0 MB 0.0 MB |

| ----------------------------- |

| Approx. total storage required per process 373.0 MB 118.8 MB |

| |

| Requirements will fluctuate during execution and may exceed these estimates |

+-----------------------------------------------------------------------------+

-------------------------------

Unit Cell

-------------------------------

Real Lattice(A) Reciprocal Lattice(1/A)

15.3030623 -8.7798711 0.0000251 0.4102336 -0.0006099 0.0000002

0.0052350 3.5210235 -0.0000122 1.0229406 1.7829561 0.0000061

-0.0000054 -0.0000429 13.4377577 0.0000002 0.0000016 0.4675769

Lattice parameters(A) Cell Angles

a = 17.642841 alpha = 90.000381

b = 3.521027 beta = 89.999848

c = 13.437758 gamma = 119.759128

Current cell volume = 724.676838 A**3

-------------------------------

Cell Contents

-------------------------------

xxxxxxxxxxxxxxxxxxxxxxxxxxxxxxxxxxxxxxxxxxxxxxxxxxxxxxxxxxxx

x Element Atom Fractional coordinates of atoms x

x Number u v w x

x----------------------------------------------------------x

x Se 1 0.066608 0.666383 0.118247 x

x Se 2 0.133349 0.333774 0.618230 x

x Se 3 0.133349 0.333772 0.881750 x

x Se 4 0.066608 0.666381 0.381772 x

x Se 5 0.266586 0.666594 0.118196 x

x Se 6 0.333318 0.333644 0.618231 x

x Se 7 0.333318 0.333643 0.881750 x

x Se 8 0.266586 0.666594 0.381823 x

x Se 9 0.466809 0.666612 0.118220 x

x Se 10 0.533190 0.333387 0.618201 x

x Se 11 0.533191 0.333387 0.881780 x

x Se 12 0.466809 0.666612 0.381798 x

x Se 13 0.666681 0.666356 0.118250 x

x Se 14 0.733414 0.333406 0.618177 x

x Se 15 0.733414 0.333405 0.881804 x

x Se 16 0.666681 0.666355 0.381769 x

x Se 17 0.866651 0.666229 0.118250 x

x Se 18 0.933393 0.333620 0.618227 x

x Se 19 0.933393 0.333619 0.881753 x

x Se 20 0.866651 0.666227 0.381769 x

x Nb 1 0.000004 0.000010 0.250002 x

x Nb 2 -0.000003 -0.000007 0.749998 x

x Nb 3 0.000000 0.000001 0.000000 x

x Nb 4 0.000001 0.000002 0.500000 x

x Nb 5 0.200008 0.000024 0.250002 x

x Nb 6 0.200000 0.000001 0.749998 x

x Nb 7 0.200002 0.000011 -0.000001 x

x Nb 8 0.200002 0.000011 0.500001 x

x Nb 9 0.400008 0.000015 0.250002 x

x Nb 10 0.399998 -0.000009 0.749998 x

x Nb 11 0.400001 -0.000001 0.000002 x

x Nb 12 0.400001 -0.000002 0.499998 x

x Nb 13 0.600001 0.000006 0.250002 x

x Nb 14 0.599991 -0.000017 0.749998 x

x Nb 15 0.599999 -0.000001 -0.000002 x

x Nb 16 0.599998 -0.000001 0.500002 x

x Nb 17 0.800000 -0.000001 0.250002 x

x Nb 18 0.799992 -0.000023 0.749998 x

x Nb 19 0.799998 -0.000010 0.000002 x

x Nb 20 0.799998 -0.000010 0.499998 x

xxxxxxxxxxxxxxxxxxxxxxxxxxxxxxxxxxxxxxxxxxxxxxxxxxxxxxxxxxxx

------------------------------------------------------------------------ <-- SCF

SCF loop Energy Energy gain Timer <-- SCF

per atom (sec) <-- SCF

------------------------------------------------------------------------ <-- SCF

Initial -3.62572391E+004 2251.62 <-- SCF

1 -3.62577048E+004 1.16420203E-002 2279.30 <-- SCF

2 -3.62577289E+004 6.02769648E-004 2311.52 <-- SCF

3 -3.62576900E+004 -9.71630379E-004 2339.70 <-- SCF

4 -3.62575790E+004 -2.77605661E-003 2367.39 <-- SCF

5 -3.62575787E+004 -7.42156895E-006 2394.97 <-- SCF

6 -3.62575780E+004 -1.66010622E-005 2417.97 <-- SCF

7 -3.62575779E+004 -1.55946579E-006 2439.14 <-- SCF

8 -3.62575780E+004 9.03026220E-007 2456.44 <-- SCF

------------------------------------------------------------------------ <-- SCF

Final energy = -36257.57797012 eV

(energy not corrected for finite basis set)

*********************************** Forces ***********************************

* *

* Cartesian components (eV/A) *

* -------------------------------------------------------------------------- *

* x y z *

* *

* Se 1 0.06392 0.00026 1.35090 *

* Se 2 -0.06542 0.00846 1.14484 *

* Se 3 -0.06647 -0.00006 -1.35197 *

* Se 4 0.05953 -0.00289 -1.14307 *

* Se 5 0.06367 -0.00016 1.35340 *

* Se 6 -0.06878 0.00609 1.14117 *

* Se 7 -0.06678 -0.00112 -1.34827 *

* Se 8 0.05824 0.00185 -1.15266 *

* Se 9 0.05837 -0.00003 1.35256 *

* Se 10 -0.07192 0.00644 1.15341 *

* Se 11 -0.05859 0.00006 -1.35252 *

* Se 12 0.07158 -0.00641 -1.15331 *

* Se 13 0.06668 0.00113 1.34827 *

* Se 14 -0.05831 -0.00187 1.15273 *

* Se 15 -0.06374 0.00015 -1.35338 *

* Se 16 0.06860 -0.00607 -1.14120 *

* Se 17 0.06667 0.00005 1.35200 *

* Se 18 -0.05919 0.00287 1.14302 *

* Se 19 -0.06372 -0.00029 -1.35089 *

* Se 20 0.06569 -0.00849 -1.14496 *

* Nb 1 -0.01478 -0.01276 0.02040 *

* Nb 2 0.01458 0.01280 -0.02038 *

* Nb 3 0.00001 0.00002 -0.00009 *

* Nb 4 0.00000 0.00002 0.00012 *

* Nb 5 -0.01388 -0.00573 0.02043 *

* Nb 6 0.01210 0.01848 -0.02044 *

* Nb 7 -0.00605 0.00794 -0.00040 *

* Nb 8 -0.00620 0.00814 0.00038 *

* Nb 9 -0.00722 -0.01623 0.02038 *

* Nb 10 0.00321 0.01731 -0.02035 *

* Nb 11 -0.00697 -0.00068 0.00808 *

* Nb 12 -0.00710 -0.00068 -0.00823 *

* Nb 13 -0.00307 -0.01733 0.02031 *

* Nb 14 0.00739 0.01617 -0.02042 *

* Nb 15 0.00694 0.00066 -0.00806 *

* Nb 16 0.00708 0.00064 0.00816 *

* Nb 17 -0.01215 -0.01845 0.02050 *

* Nb 18 0.01382 0.00573 -0.02047 *

* Nb 19 0.00604 -0.00794 0.00028 *

* Nb 20 0.00621 -0.00809 -0.00027 *

* *

******************************************************************************

***************** Stress Tensor *****************

* *

* Cartesian components (GPa) *

* --------------------------------------------- *

* x y z *

* *

* x 3.167133 -0.061794 -0.001637 *

* y -0.061794 4.095674 0.003641 *

* z -0.001637 0.003641 -1.476942 *

* *

* Pressure: -1.9286 *

* *

*************************************************

+------------+-------------+-------------+-----------------+ <-- min BFGS

| Step | lambda | F.delta | enthalpy | <-- min BFGS

+------------+-------------+-------------+-----------------+ <-- min BFGS

| previous | 0.000000 | 0.006419 | -36257.418929 | <-- min BFGS

| trial step | 1.000000 | 0.005276 | -36257.578074 | <-- min BFGS

+------------+-------------+-------------+-----------------+ <-- min BFGS

--------------------------------------------------------------------------------

BFGS: improving iteration 3 with line minimization (lambda= 3.585607)

--------------------------------------------------------------------------------

+---------------- MEMORY AND SCRATCH DISK ESTIMATES PER PROCESS --------------+

| Memory Disk |

| Model and support data 166.2 MB 118.8 MB |

| Electronic energy minimisation requirements 90.3 MB 0.0 MB |

| Geometry minimisation requirements 118.8 MB 0.0 MB |

| ----------------------------- |

| Approx. total storage required per process 375.3 MB 118.8 MB |

| |

| Requirements will fluctuate during execution and may exceed these estimates |

+-----------------------------------------------------------------------------+

-------------------------------

Unit Cell

-------------------------------

Real Lattice(A) Reciprocal Lattice(1/A)

15.2698331 -8.7327527 0.0001308 0.4110241 -0.0007919 -0.0000006

0.0067526 3.5048172 -0.0000421 1.0241253 1.7907552 0.0000180

0.0000193 -0.0001480 13.6285544 -0.0000008 0.0000055 0.4610309

Lattice parameters(A) Cell Angles

a = 17.590588 alpha = 90.001310

b = 3.504824 beta = 89.999195

c = 13.628554 gamma = 119.654666

Current cell volume = 730.176279 A**3

-------------------------------

Cell Contents

-------------------------------

xxxxxxxxxxxxxxxxxxxxxxxxxxxxxxxxxxxxxxxxxxxxxxxxxxxxxxxxxxxx

x Element Atom Fractional coordinates of atoms x

x Number u v w x

x----------------------------------------------------------x

x Se 1 0.066610 0.666367 0.118756 x

x Se 2 0.133340 0.333822 0.618692 x

x Se 3 0.133340 0.333816 0.881239 x

x Se 4 0.066609 0.666362 0.381313 x

x Se 5 0.266586 0.666616 0.118700 x

x Se 6 0.333302 0.333667 0.618690 x

x Se 7 0.333303 0.333663 0.881241 x

x Se 8 0.266585 0.666614 0.381366 x

x Se 9 0.466844 0.666629 0.118727 x

x Se 10 0.533154 0.333369 0.618660 x

x Se 11 0.533156 0.333369 0.881273 x

x Se 12 0.466846 0.666629 0.381340 x

x Se 13 0.666697 0.666337 0.118759 x

x Se 14 0.733415 0.333385 0.618633 x

x Se 15 0.733414 0.333384 0.881300 x

x Se 16 0.666697 0.666332 0.381310 x

x Se 17 0.866661 0.666186 0.118761 x

x Se 18 0.933391 0.333640 0.618687 x

x Se 19 0.933391 0.333635 0.881244 x

x Se 20 0.866661 0.666180 0.381308 x

x Nb 1 0.000002 -0.000004 0.250006 x

x Nb 2 -0.000001 0.000007 0.749994 x

x Nb 3 0.000000 0.000001 0.000000 x

x Nb 4 0.000001 0.000002 0.500000 x

x Nb 5 0.200007 0.000018 0.250006 x

x Nb 6 0.200002 0.000020 0.749994 x

x Nb 7 0.200001 0.000017 -0.000001 x

x Nb 8 0.200001 0.000017 0.500001 x

x Nb 9 0.400008 0.000002 0.250006 x

x Nb 10 0.399997 0.000004 0.749994 x

x Nb 11 0.400000 -0.000005 0.000005 x

x Nb 12 0.399999 -0.000006 0.499995 x

x Nb 13 0.600002 -0.000006 0.250006 x

x Nb 14 0.599991 -0.000004 0.749994 x

x Nb 15 0.600000 0.000003 -0.000004 x

x Nb 16 0.600000 0.000003 0.500004 x

x Nb 17 0.799998 -0.000019 0.250006 x

x Nb 18 0.799994 -0.000017 0.749994 x

x Nb 19 0.799999 -0.000016 0.000002 x

x Nb 20 0.799999 -0.000016 0.499998 x

xxxxxxxxxxxxxxxxxxxxxxxxxxxxxxxxxxxxxxxxxxxxxxxxxxxxxxxxxxxx

------------------------------------------------------------------------ <-- SCF

SCF loop Energy Energy gain Timer <-- SCF

per atom (sec) <-- SCF

------------------------------------------------------------------------ <-- SCF

Initial -3.62556086E+004 2557.12 <-- SCF

1 -3.62590078E+004 8.49789922E-002 2585.02 <-- SCF

2 -3.62591757E+004 4.19855378E-003 2617.59 <-- SCF

3 -3.62591003E+004 -1.88669113E-003 2645.80 <-- SCF

4 -3.62578427E+004 -3.14390645E-002 2673.53 <-- SCF

5 -3.62578622E+004 4.86996771E-004 2705.72 <-- SCF

6 -3.62578526E+004 -2.38839898E-004 2734.25 <-- SCF

7 -3.62578528E+004 5.21221067E-006 2761.06 <-- SCF

8 -3.62578534E+004 1.32727092E-005 2781.36 <-- SCF

9 -3.62578539E+004 1.30397382E-005 2799.31 <-- SCF

10 -3.62578545E+004 1.47977010E-005 2817.52 <-- SCF

11 -3.62578554E+004 2.19964698E-005 2834.77 <-- SCF

12 -3.62578567E+004 3.33560613E-005 2852.97 <-- SCF

13 -3.62578588E+004 5.31045290E-005 2870.62 <-- SCF

14 -3.62578622E+004 8.48536870E-005 2887.94 <-- SCF

15 -3.62578672E+004 1.24689436E-004 2905.17 <-- SCF

16 -3.62578740E+004 1.71105024E-004 2922.56 <-- SCF

17 -3.62578820E+004 2.00030789E-004 2939.95 <-- SCF

18 -3.62578901E+004 2.01630962E-004 2957.06 <-- SCF

19 -3.62579032E+004 3.26561807E-004 2974.52 <-- SCF

20 -3.62579091E+004 1.47234905E-004 2991.50 <-- SCF

21 -3.62579122E+004 7.82518261E-005 3008.78 <-- SCF

22 -3.62579144E+004 5.41723175E-005 3025.78 <-- SCF

23 -3.62579160E+004 4.13465171E-005 3042.89 <-- SCF

24 -3.62579171E+004 2.70221030E-005 3059.91 <-- SCF

25 -3.62579178E+004 1.79331902E-005 3077.19 <-- SCF

26 -3.62579182E+004 1.02767311E-005 3093.77 <-- SCF

27 -3.62579185E+004 6.65541492E-006 3110.62 <-- SCF

28 -3.62579187E+004 5.36277039E-006 3126.88 <-- SCF

29 -3.62579188E+004 2.44605197E-006 3143.02 <-- SCF

30 -3.62579189E+004 2.49033466E-006 3160.39 <-- SCF

31 -3.62579189E+004 6.87473092E-007 3177.09 <-- SCF

32 -3.62579189E+004 -3.72931863E-007 3194.39 <-- SCF

------------------------------------------------------------------------ <-- SCF

Final energy = -36257.91890589 eV

(energy not corrected for finite basis set)

*********************************** Forces ***********************************

* *

* Cartesian components (eV/A) *

* -------------------------------------------------------------------------- *

* x y z *

* *

* Se 1 0.08935 0.00287 1.21400 *

* Se 2 -0.08592 0.03009 1.03663 *

* Se 3 -0.09349 -0.01079 -1.21579 *

* Se 4 0.06452 -0.00764 -1.03203 *

* Se 5 0.09013 -0.00581 1.21634 *

* Se 6 -0.09976 0.02365 1.02772 *

* Se 7 -0.09143 -0.01059 -1.20789 *

* Se 8 0.05675 0.01392 -1.02407 *

* Se 9 0.05906 0.01050 1.21162 *

* Se 10 -0.12211 0.02285 1.03387 *

* Se 11 -0.05916 -0.01052 -1.21165 *

* Se 12 0.12122 -0.02287 -1.03348 *

* Se 13 0.09156 0.01057 1.20770 *

* Se 14 -0.05693 -0.01397 1.02405 *

* Se 15 -0.09026 0.00580 -1.21611 *

* Se 16 0.09942 -0.02366 -1.02758 *

* Se 17 0.09379 0.01074 1.21579 *

* Se 18 -0.06377 0.00761 1.03181 *

* Se 19 -0.08926 -0.00289 -1.21384 *

* Se 20 0.08647 -0.03016 -1.03684 *

* Nb 1 -0.03865 -0.00914 0.03166 *

* Nb 2 0.03783 0.00920 -0.03169 *

* Nb 3 -0.00001 -0.00001 -0.00010 *

* Nb 4 -0.00011 0.00005 0.00014 *

* Nb 5 -0.02728 -0.00388 0.03305 *

* Nb 6 0.04652 0.01428 -0.03362 *

* Nb 7 -0.00685 0.00853 0.00013 *

* Nb 8 -0.00609 0.00732 -0.00181 *

* Nb 9 -0.02702 -0.01421 0.03346 *

* Nb 10 0.03768 0.01239 -0.03335 *

* Nb 11 -0.00720 -0.00053 0.00836 *

* Nb 12 -0.00702 -0.00170 -0.00921 *

* Nb 13 -0.03710 -0.01267 0.03320 *

* Nb 14 0.02792 0.01415 -0.03346 *

* Nb 15 0.00723 0.00062 -0.00854 *

* Nb 16 0.00722 0.00181 0.00939 *

* Nb 17 -0.04700 -0.01416 0.03350 *

* Nb 18 0.02698 0.00396 -0.03301 *

* Nb 19 0.00661 -0.00858 -0.00036 *

* Nb 20 0.00615 -0.00712 0.00203 *

* *

******************************************************************************

***************** Stress Tensor *****************

* *

* Cartesian components (GPa) *

* --------------------------------------------- *

* x y z *

* *

* x 4.499310 -0.752241 -0.000298 *

* y -0.752241 5.676715 0.014847 *

* z -0.000298 0.014847 0.451136 *

* *

* Pressure: -3.5424 *

* *

*************************************************

+------------+-------------+-------------+-----------------+ <-- min BFGS

| Step | lambda | F.delta | enthalpy | <-- min BFGS

+------------+-------------+-------------+-----------------+ <-- min BFGS

| previous | 0.000000 | 0.006419 | -36257.418929 | <-- min BFGS

| trial step | 1.000000 | 0.005276 | -36257.578074 | <-- min BFGS

| line step | 3.585607 | 0.004012 | -36257.918839 | <-- min BFGS

+------------+-------------+-------------+-----------------+ <-- min BFGS

BFGS: finished iteration 3 with enthalpy= -3.62579188E+004 eV

+-----------+-----------------+-----------------+------------+-----+ <-- BFGS

| Parameter | value | tolerance | units | OK? | <-- BFGS

+-----------+-----------------+-----------------+------------+-----+ <-- BFGS

| dE/ion | 1.249775E-002 | 5.000000E-006 | eV | No | <-- BFGS

| |F|max | 1.219687E+000 | 1.000000E-002 | eV/A | No | <-- BFGS

| |dR|max | 9.660978E-003 | 5.000000E-004 | A | No | <-- BFGS

| Smax | 5.676715E+000 | 2.000000E-002 | GPa | No | <-- BFGS

+-----------+-----------------+-----------------+------------+-----+ <-- BFGS

================================================================================

Starting BFGS iteration 4 ...

================================================================================

+------------+-------------+-------------+-----------------+ <-- min BFGS

| Step | lambda | F.delta | enthalpy | <-- min BFGS

+------------+-------------+-------------+-----------------+ <-- min BFGS

| previous | 0.000000 | 0.062536 | -36257.918839 | <-- min BFGS

+------------+-------------+-------------+-----------------+ <-- min BFGS

--------------------------------------------------------------------------------

BFGS: starting iteration 4 with trial guess (lambda= 0.396746)

--------------------------------------------------------------------------------

+---------------- MEMORY AND SCRATCH DISK ESTIMATES PER PROCESS --------------+

| Memory Disk |

| Model and support data 166.4 MB 123.1 MB |

| Electronic energy minimisation requirements 90.3 MB 0.0 MB |

| Geometry minimisation requirements 118.9 MB 0.0 MB |

| ----------------------------- |

| Approx. total storage required per process 375.5 MB 123.1 MB |

| |

| Requirements will fluctuate during execution and may exceed these estimates |

+-----------------------------------------------------------------------------+

-------------------------------

Unit Cell

-------------------------------

Real Lattice(A) Reciprocal Lattice(1/A)

15.1527632 -8.6100069 0.0003955 0.4139100 -0.0013130 -0.0000018

0.0109856 3.4630544 -0.0001277 1.0290823 1.8110833 0.0000537

0.0000597 -0.0004455 13.8931428 -0.0000023 0.0000167 0.4522508

Lattice parameters(A) Cell Angles

a = 17.428094 alpha = 90.003950

b = 3.463072 beta = 89.997578

c = 13.893143 gamma = 119.424074

Current cell volume = 730.354597 A**3

-------------------------------

Cell Contents

-------------------------------

xxxxxxxxxxxxxxxxxxxxxxxxxxxxxxxxxxxxxxxxxxxxxxxxxxxxxxxxxxxx

x Element Atom Fractional coordinates of atoms x

x Number u v w x

x----------------------------------------------------------x

x Se 1 0.066622 0.666371 0.119633 x

x Se 2 0.133318 0.333873 0.619477 x

x Se 3 0.133317 0.333844 0.880360 x

x Se 4 0.066619 0.666353 0.380530 x

x Se 5 0.266595 0.666668 0.119572 x

x Se 6 0.333270 0.333679 0.619472 x

x Se 7 0.333271 0.333660 0.880365 x

x Se 8 0.266590 0.666664 0.380588 x

x Se 9 0.466897 0.666673 0.119600 x

x Se 10 0.533092 0.333322 0.619442 x

x Se 11 0.533102 0.333324 0.880400 x

x Se 12 0.466907 0.666675 0.380558 x

x Se 13 0.666728 0.666340 0.119635 x

x Se 14 0.733410 0.333336 0.619412 x

x Se 15 0.733405 0.333332 0.880429 x

x Se 16 0.666729 0.666320 0.380528 x

x Se 17 0.866684 0.666157 0.119640 x

x Se 18 0.933382 0.333649 0.619470 x

x Se 19 0.933379 0.333631 0.880367 x

x Se 20 0.866683 0.666129 0.380522 x

x Nb 1 -0.000004 -0.000037 0.250015 x

x Nb 2 0.000006 0.000040 0.749985 x

x Nb 3 0.000000 0.000001 0.000000 x

x Nb 4 0.000001 0.000002 0.500000 x

x Nb 5 0.200002 0.000002 0.250016 x

x Nb 6 0.200008 0.000063 0.749984 x

x Nb 7 0.199999 0.000027 -0.000002 x

x Nb 8 0.199999 0.000026 0.500002 x

x Nb 9 0.400006 -0.000029 0.250015 x

x Nb 10 0.400000 0.000035 0.749985 x

x Nb 11 0.399997 -0.000014 0.000010 x

x Nb 12 0.399997 -0.000015 0.499990 x

x Nb 13 0.599999 -0.000038 0.250015 x

x Nb 14 0.599993 0.000026 0.749985 x

x Nb 15 0.600002 0.000011 -0.000009 x

x Nb 16 0.600002 0.000012 0.500009 x

x Nb 17 0.799992 -0.000062 0.250015 x

x Nb 18 0.799998 -0.000001 0.749985 x

x Nb 19 0.800001 -0.000026 0.000003 x

x Nb 20 0.800001 -0.000025 0.499998 x

xxxxxxxxxxxxxxxxxxxxxxxxxxxxxxxxxxxxxxxxxxxxxxxxxxxxxxxxxxxx

------------------------------------------------------------------------ <-- SCF

SCF loop Energy Energy gain Timer <-- SCF

per atom (sec) <-- SCF

------------------------------------------------------------------------ <-- SCF

Initial -3.62528775E+004 3295.83 <-- SCF

1 -3.62628195E+004 2.48548209E-001 3324.39 <-- SCF

2 -3.62633032E+004 1.20938366E-002 3355.88 <-- SCF

3 -3.62638258E+004 1.30654702E-002 3383.61 <-- SCF

4 -3.62584412E+004 -1.34615685E-001 3411.25 <-- SCF

5 -3.62586279E+004 4.66801051E-003 3441.84 <-- SCF

6 -3.62585746E+004 -1.33303995E-003 3472.42 <-- SCF

7 -3.62585541E+004 -5.13861018E-004 3501.86 <-- SCF

8 -3.62585539E+004 -3.00796314E-006 3530.47 <-- SCF

9 -3.62585541E+004 4.55797775E-006 3556.23 <-- SCF

10 -3.62585540E+004 -2.95665603E-006 3577.16 <-- SCF

11 -3.62585540E+004 -5.89357225E-008 3598.08 <-- SCF

12 -3.62585540E+004 1.09215618E-006 3619.30 <-- SCF

------------------------------------------------------------------------ <-- SCF

Final energy = -36258.55404822 eV

(energy not corrected for finite basis set)

*********************************** Forces ***********************************

* *

* Cartesian components (eV/A) *

* -------------------------------------------------------------------------- *

* x y z *

* *

* Se 1 -0.03837 -0.12937 1.02258 *

* Se 2 -0.00385 0.25086 1.05733 *

* Se 3 0.00239 0.25348 -1.01605 *

* Se 4 -0.02718 -0.11894 -1.06517 *

* Se 5 -0.20602 0.07730 1.25665 *

* Se 6 -0.12252 0.16190 1.03024 *

* Se 7 -0.12129 0.18396 -0.98220 *

* Se 8 -0.21819 0.09113 -1.27161 *

* Se 9 0.44463 -0.25945 1.10792 *

* Se 10 -0.46354 0.27693 1.13805 *

* Se 11 -0.44426 0.25947 -1.10774 *

* Se 12 0.46389 -0.27692 -1.13823 *

* Se 13 0.12112 -0.18396 0.98194 *

* Se 14 0.21777 -0.09117 1.27147 *

* Se 15 0.20562 -0.07734 -1.25652 *

* Se 16 0.12243 -0.16193 -1.02998 *

* Se 17 -0.00241 -0.25353 1.01630 *

* Se 18 0.02725 0.11904 1.06550 *

* Se 19 0.03847 0.12947 -1.02291 *

* Se 20 0.00376 -0.25093 -1.05756 *

* Nb 1 -0.05914 -0.02058 0.00810 *

* Nb 2 0.05814 0.02066 -0.00810 *

* Nb 3 0.00015 -0.00008 0.00014 *

* Nb 4 0.00013 -0.00009 -0.00014 *

* Nb 5 -0.08462 -0.01080 0.00787 *

* Nb 6 0.05521 0.02859 -0.00751 *

* Nb 7 0.00956 0.00598 0.00787 *

* Nb 8 0.00955 0.00636 -0.00768 *

* Nb 9 -0.00475 -0.02701 0.00781 *

* Nb 10 0.09987 0.01873 -0.00793 *

* Nb 11 -0.01252 0.00675 -0.00806 *

* Nb 12 -0.01218 0.00670 0.00728 *

* Nb 13 -0.10021 -0.01869 0.00795 *

* Nb 14 0.00469 0.02707 -0.00783 *

* Nb 15 0.01264 -0.00678 0.00811 *

* Nb 16 0.01235 -0.00672 -0.00733 *

* Nb 17 -0.05435 -0.02866 0.00757 *

* Nb 18 0.08535 0.01073 -0.00793 *

* Nb 19 -0.00977 -0.00586 -0.00826 *

* Nb 20 -0.00977 -0.00624 0.00805 *

* *

******************************************************************************

***************** Stress Tensor *****************

* *

* Cartesian components (GPa) *

* --------------------------------------------- *

* x y z *

* *

* x 4.267858 -0.062359 0.005254 *

* y -0.062359 4.644625 -0.004999 *

* z 0.005254 -0.004999 4.090738 *

* *

* Pressure: -4.3344 *

* *

*************************************************

+------------+-------------+-------------+-----------------+ <-- min BFGS

| Step | lambda | F.delta | enthalpy | <-- min BFGS

+------------+-------------+-------------+-----------------+ <-- min BFGS

| previous | 0.000000 | 0.062536 | -36257.918839 | <-- min BFGS

| trial step | 0.396746 | 0.027059 | -36258.554041 | <-- min BFGS

+------------+-------------+-------------+-----------------+ <-- min BFGS

BFGS: finished iteration 4 with enthalpy= -3.62585540E+004 eV

+-----------+-----------------+-----------------+------------+-----+ <-- BFGS

| Parameter | value | tolerance | units | OK? | <-- BFGS

+-----------+-----------------+-----------------+------------+-----+ <-- BFGS

| dE/ion | 1.588005E-002 | 5.000000E-006 | eV | No | <-- BFGS

| |F|max | 1.293404E+000 | 1.000000E-002 | eV/A | No | <-- BFGS

| |dR|max | 1.222446E-002 | 5.000000E-004 | A | No | <-- BFGS

| Smax | 4.644625E+000 | 2.000000E-002 | GPa | No | <-- BFGS

+-----------+-----------------+-----------------+------------+-----+ <-- BFGS

================================================================================

Starting BFGS iteration 5 ...

================================================================================

Writing analysis data to 2H-Nb1.1Se2-7-UF.castep_bin

Writing model to 2H-Nb1.1Se2-7-UF.check

+------------+-------------+-------------+-----------------+ <-- min BFGS

| Step | lambda | F.delta | enthalpy | <-- min BFGS

+------------+-------------+-------------+-----------------+ <-- min BFGS

| previous | 0.000000 | 0.023434 | -36258.554041 | <-- min BFGS

+------------+-------------+-------------+-----------------+ <-- min BFGS

--------------------------------------------------------------------------------

BFGS: starting iteration 5 with trial guess (lambda= 1.000000)

--------------------------------------------------------------------------------

-------------------------------

Unit Cell

-------------------------------

Real Lattice(A) Reciprocal Lattice(1/A)

14.9695656 -8.4576534 0.0004071 0.4188334 -0.0015880 -0.0000008

0.0129118 3.4054783 -0.0001508 1.0401910 1.8410790 0.0000678

0.0000259 -0.0005324 14.0670959 -0.0000010 0.0000198 0.4466583

Lattice parameters(A) Cell Angles

a = 17.193598 alpha = 90.004705

b = 3.405503 beta = 89.997485

c = 14.067096 gamma = 119.248775

Current cell volume = 718.656059 A**3

-------------------------------

Cell Contents

-------------------------------

xxxxxxxxxxxxxxxxxxxxxxxxxxxxxxxxxxxxxxxxxxxxxxxxxxxxxxxxxxxx

x Element Atom Fractional coordinates of atoms x

x Number u v w x

x----------------------------------------------------------x

x Se 1 0.066630 0.666296 0.120598 x

x Se 2 0.133297 0.334032 0.620363 x

x Se 3 0.133297 0.334003 0.879395 x

x Se 4 0.066627 0.666284 0.379644 x

x Se 5 0.266577 0.666689 0.120575 x

x Se 6 0.333228 0.333722 0.620351 x

x Se 7 0.333230 0.333714 0.879408 x

x Se 8 0.266571 0.666686 0.379666 x

x Se 9 0.466999 0.666715 0.120579 x

x Se 10 0.532987 0.333284 0.620342 x

x Se 11 0.533000 0.333283 0.879421 x

x Se 12 0.467012 0.666713 0.379658 x

x Se 13 0.666770 0.666285 0.120592 x

x Se 14 0.733429 0.333313 0.620334 x

x Se 15 0.733422 0.333310 0.879425 x

x Se 16 0.666771 0.666277 0.379649 x

x Se 17 0.866704 0.665998 0.120605 x

x Se 18 0.933374 0.333719 0.620356 x

x Se 19 0.933371 0.333707 0.879402 x

x Se 20 0.866704 0.665970 0.379637 x

x Nb 1 -0.000016 -0.000094 0.250023 x

x Nb 2 0.000017 0.000097 0.749977 x

x Nb 3 0.000000 0.000001 0.000000 x

x Nb 4 0.000001 0.000002 0.500000 x

x Nb 5 0.199988 -0.000045 0.250024 x

x Nb 6 0.200018 0.000129 0.749977 x

x Nb 7 0.199999 0.000042 -0.000001 x

x Nb 8 0.199999 0.000042 0.500001 x

x Nb 9 0.400005 -0.000070 0.250023 x

x Nb 10 0.400013 0.000101 0.749977 x

x Nb 11 0.399993 -0.000022 0.000012 x

x Nb 12 0.399992 -0.000023 0.499987 x

x Nb 13 0.599986 -0.000104 0.250023 x

x Nb 14 0.599994 0.000067 0.749977 x

x Nb 15 0.600007 0.000019 -0.000012 x

x Nb 16 0.600006 0.000019 0.500012 x

x Nb 17 0.799982 -0.000129 0.250023 x

x Nb 18 0.800013 0.000047 0.749977 x

x Nb 19 0.800002 -0.000041 0.000002 x

x Nb 20 0.800002 -0.000041 0.499998 x

xxxxxxxxxxxxxxxxxxxxxxxxxxxxxxxxxxxxxxxxxxxxxxxxxxxxxxxxxxxx

------------------------------------------------------------------------ <-- SCF

SCF loop Energy Energy gain Timer <-- SCF

per atom (sec) <-- SCF

------------------------------------------------------------------------ <-- SCF

Initial -3.62525759E+004 3724.36 <-- SCF

1 -3.62643969E+004 2.95525788E-001 3754.17 <-- SCF

2 -3.62649668E+004 1.42468944E-002 3788.78 <-- SCF

3 -3.62634087E+004 -3.89525360E-002 3816.05 <-- SCF

4 -3.62589965E+004 -1.10303915E-001 3842.78 <-- SCF

5 -3.62590249E+004 7.10341588E-004 3872.22 <-- SCF

6 -3.62589941E+004 -7.70928567E-004 3900.78 <-- SCF

7 -3.62589919E+004 -5.42270635E-005 3929.70 <-- SCF

8 -3.62589925E+004 1.28757547E-005 3955.55 <-- SCF

9 -3.62589926E+004 3.60948493E-006 3979.11 <-- SCF

10 -3.62589930E+004 8.80852579E-006 3998.02 <-- SCF

11 -3.62589932E+004 5.71572085E-006 4016.42 <-- SCF

12 -3.62589933E+004 3.84335528E-006 4034.61 <-- SCF

13 -3.62589934E+004 2.68833283E-006 4052.12 <-- SCF

14 -3.62589935E+004 1.82115342E-006 4069.38 <-- SCF

15 -3.62589936E+004 1.39056766E-006 4086.58 <-- SCF

16 -3.62589936E+004 1.09090019E-006 4104.45 <-- SCF

17 -3.62589937E+004 8.26738473E-007 4121.77 <-- SCF

------------------------------------------------------------------------ <-- SCF

Final energy = -36258.99365040 eV

(energy not corrected for finite basis set)

*********************************** Forces ***********************************

* *

* Cartesian components (eV/A) *

* -------------------------------------------------------------------------- *

* x y z *

* *

* Se 1 -0.00792 -0.22774 0.84295 *

* Se 2 -0.02810 0.25541 0.88739 *

* Se 3 -0.03054 0.24151 -0.82727 *

* Se 4 -0.04190 -0.22665 -0.89207 *

* Se 5 -0.08983 -0.02514 1.06772 *

* Se 6 -0.11203 0.24012 0.79529 *

* Se 7 -0.11609 0.23531 -0.71912 *

* Se 8 -0.11950 -0.02409 -1.12125 *

* Se 9 0.29952 -0.17617 0.89789 *

* Se 10 -0.33249 0.18363 0.93857 *

* Se 11 -0.29933 0.17616 -0.89772 *

* Se 12 0.33274 -0.18361 -0.93876 *

* Se 13 0.11603 -0.23522 0.71892 *

* Se 14 0.11928 0.02404 1.12117 *

* Se 15 0.08963 0.02509 -1.06766 *

* Se 16 0.11203 -0.24005 -0.79510 *

* Se 17 0.03050 -0.24168 0.82749 *

* Se 18 0.04197 0.22684 0.89214 *

* Se 19 0.00805 0.22791 -0.84301 *

* Se 20 0.02803 -0.25558 -0.88760 *

* Nb 1 -0.06516 -0.01813 0.01790 *

* Nb 2 0.06437 0.01861 -0.01790 *

* Nb 3 0.00015 -0.00034 0.00017 *

* Nb 4 0.00013 -0.00034 -0.00016 *

* Nb 5 -0.10051 0.00258 0.01797 *

* Nb 6 0.07266 0.04527 -0.01755 *

* Nb 7 0.00393 -0.00172 0.00758 *

* Nb 8 0.00313 -0.00081 -0.00831 *

* Nb 9 -0.02399 -0.04048 0.01792 *

* Nb 10 0.09086 0.00550 -0.01843 *

* Nb 11 -0.02214 0.03000 -0.00309 *

* Nb 12 -0.02134 0.02904 0.00289 *

* Nb 13 -0.09130 -0.00539 0.01847 *

* Nb 14 0.02408 0.04072 -0.01796 *

* Nb 15 0.02223 -0.03021 0.00313 *

* Nb 16 0.02148 -0.02925 -0.00292 *

* Nb 17 -0.07191 -0.04562 0.01761 *

* Nb 18 0.10091 -0.00302 -0.01803 *

* Nb 19 -0.00418 0.00223 -0.00797 *

* Nb 20 -0.00341 0.00131 0.00869 *

* *

******************************************************************************

***************** Stress Tensor *****************

* *

* Cartesian components (GPa) *

* --------------------------------------------- *

* x y z *

* *

* x 2.026669 -0.056777 0.006762 *

* y -0.056777 1.826267 -0.033465 *

* z 0.006762 -0.033465 4.510709 *

* *

* Pressure: -2.7879 *

* *

*************************************************

+------------+-------------+-------------+-----------------+ <-- min BFGS

| Step | lambda | F.delta | enthalpy | <-- min BFGS

+------------+-------------+-------------+-----------------+ <-- min BFGS

| previous | 0.000000 | 0.023434 | -36258.554041 | <-- min BFGS

| trial step | 1.000000 | 0.008738 | -36258.993578 | <-- min BFGS

+------------+-------------+-------------+-----------------+ <-- min BFGS

BFGS: finished iteration 5 with enthalpy= -3.62589936E+004 eV

+-----------+-----------------+-----------------+------------+-----+ <-- BFGS

| Parameter | value | tolerance | units | OK? | <-- BFGS

+-----------+-----------------+-----------------+------------+-----+ <-- BFGS

| dE/ion | 1.098843E-002 | 5.000000E-006 | eV | No | <-- BFGS

| |F|max | 1.127856E+000 | 1.000000E-002 | eV/A | No | <-- BFGS

| |dR|max | 1.412300E-002 | 5.000000E-004 | A | No | <-- BFGS

| Smax | 4.510709E+000 | 2.000000E-002 | GPa | No | <-- BFGS

+-----------+-----------------+-----------------+------------+-----+ <-- BFGS

================================================================================

Starting BFGS iteration 6 ...

================================================================================

+------------+-------------+-------------+-----------------+ <-- min BFGS

| Step | lambda | F.delta | enthalpy | <-- min BFGS

+------------+-------------+-------------+-----------------+ <-- min BFGS

| previous | 0.000000 | 0.010377 | -36258.993578 | <-- min BFGS

+------------+-------------+-------------+-----------------+ <-- min BFGS

--------------------------------------------------------------------------------

BFGS: starting iteration 6 with trial guess (lambda= 1.000000)

--------------------------------------------------------------------------------

-------------------------------

Unit Cell

-------------------------------

Real Lattice(A) Reciprocal Lattice(1/A)

14.8466535 -8.3691723 -0.0000128 0.4222528 -0.0016900 0.0000017

0.0134923 3.3710963 -0.0000275 1.0482960 1.8596447 0.0000227

-0.0000557 -0.0001408 14.0751441 0.0000024 0.0000036 0.4464029

Lattice parameters(A) Cell Angles

a = 17.043068 alpha = 90.001041

b = 3.371123 beta = 89.999959

c = 14.075144 gamma = 119.180972

Current cell volume = 706.043258 A**3

-------------------------------

Cell Contents

-------------------------------

xxxxxxxxxxxxxxxxxxxxxxxxxxxxxxxxxxxxxxxxxxxxxxxxxxxxxxxxxxxx

x Element Atom Fractional coordinates of atoms x

x Number u v w x

x----------------------------------------------------------x

x Se 1 0.066638 0.666181 0.121137 x

x Se 2 0.133282 0.334163 0.620865 x

x Se 3 0.133282 0.334128 0.878860 x

x Se 4 0.066632 0.666161 0.379141 x

x Se 5 0.266571 0.666671 0.121160 x

x Se 6 0.333199 0.333798 0.620836 x

x Se 7 0.333200 0.333789 0.878892 x

x Se 8 0.266560 0.666659 0.379115 x

x Se 9 0.467061 0.666741 0.121130 x

x Se 10 0.532920 0.333252 0.620857 x

x Se 11 0.532938 0.333257 0.878870 x

x Se 12 0.467079 0.666745 0.379143 x

x Se 13 0.666799 0.666210 0.121108 x

x Se 14 0.733439 0.333340 0.620884 x

x Se 15 0.733429 0.333328 0.878841 x

x Se 16 0.666800 0.666201 0.379164 x

x Se 17 0.866719 0.665874 0.121141 x

x Se 18 0.933369 0.333842 0.620858 x

x Se 19 0.933363 0.333822 0.878864 x

x Se 20 0.866719 0.665839 0.379135 x

x Nb 1 -0.000027 -0.000143 0.250030 x

x Nb 2 0.000028 0.000146 0.749970 x

x Nb 3 0.000001 0.000001 0.000000 x

x Nb 4 0.000001 0.000002 0.500000 x

x Nb 5 0.199971 -0.000090 0.250030 x

x Nb 6 0.200029 0.000198 0.749970 x

x Nb 7 0.199998 0.000048 0.000000 x

x Nb 8 0.199998 0.000048 0.500000 x

x Nb 9 0.400001 -0.000115 0.250030 x

x Nb 10 0.400026 0.000152 0.749970 x

x Nb 11 0.399988 -0.000017 0.000014 x

x Nb 12 0.399988 -0.000019 0.499986 x

x Nb 13 0.599973 -0.000155 0.250030 x

x Nb 14 0.599998 0.000112 0.749971 x

x Nb 15 0.600011 0.000015 -0.000013 x

x Nb 16 0.600011 0.000015 0.500013 x

x Nb 17 0.799971 -0.000197 0.250029 x

x Nb 18 0.800030 0.000091 0.749971 x

x Nb 19 0.800002 -0.000047 0.000000 x

x Nb 20 0.800002 -0.000047 0.500000 x

xxxxxxxxxxxxxxxxxxxxxxxxxxxxxxxxxxxxxxxxxxxxxxxxxxxxxxxxxxxx

------------------------------------------------------------------------ <-- SCF

SCF loop Energy Energy gain Timer <-- SCF

per atom (sec) <-- SCF

------------------------------------------------------------------------ <-- SCF

Initial -3.62567189E+004 4225.69 <-- SCF

1 -3.62616900E+004 1.24278298E-001 4253.44 <-- SCF

2 -3.62619374E+004 6.18439374E-003 4283.64 <-- SCF

3 -3.62606104E+004 -3.31751628E-002 4310.86 <-- SCF

4 -3.62591874E+004 -3.55751011E-002 4337.91 <-- SCF

5 -3.62591697E+004 -4.42196643E-004 4364.67 <-- SCF

6 -3.62591669E+004 -7.13520135E-005 4392.95 <-- SCF

7 -3.62591680E+004 2.94694959E-005 4418.94 <-- SCF

8 -3.62591687E+004 1.51929402E-005 4440.41 <-- SCF

9 -3.62591692E+004 1.33479002E-005 4459.78 <-- SCF

10 -3.62591697E+004 1.34068787E-005 4478.11 <-- SCF

11 -3.62591704E+004 1.57990375E-005 4496.89 <-- SCF

12 -3.62591712E+004 2.04710318E-005 4515.38 <-- SCF

13 -3.62591724E+004 3.01179127E-005 4533.61 <-- SCF

14 -3.62591739E+004 3.86977909E-005 4551.88 <-- SCF

15 -3.62591760E+004 5.11251943E-005 4570.44 <-- SCF

16 -3.62591787E+004 6.70180913E-005 4588.31 <-- SCF

17 -3.62591820E+004 8.49093073E-005 4606.66 <-- SCF

18 -3.62591861E+004 1.02197699E-004 4625.03 <-- SCF

19 -3.62591908E+004 1.16772580E-004 4643.80 <-- SCF

20 -3.62591958E+004 1.23957711E-004 4662.08 <-- SCF

21 -3.62592008E+004 1.25913648E-004 4680.69 <-- SCF

22 -3.62592055E+004 1.17305859E-004 4699.59 <-- SCF

23 -3.62592099E+004 1.09298614E-004 4717.39 <-- SCF

24 -3.62592132E+004 8.45106474E-005 4736.20 <-- SCF

25 -3.62592162E+004 7.33851731E-005 4754.33 <-- SCF

26 -3.62592184E+004 5.44181855E-005 4773.22 <-- SCF

27 -3.62592199E+004 3.75424387E-005 4791.62 <-- SCF

28 -3.62592210E+004 2.91886434E-005 4810.16 <-- SCF

29 -3.62592218E+004 1.98721821E-005 4828.11 <-- SCF

30 -3.62592224E+004 1.38300396E-005 4846.77 <-- SCF

31 -3.62592228E+004 9.43070957E-006 4865.33 <-- SCF

32 -3.62592230E+004 5.37167541E-006 4883.91 <-- SCF

33 -3.62592231E+004 2.46501761E-006 4902.05 <-- SCF

34 -3.62592231E+004 1.39713981E-006 4920.28 <-- SCF

35 -3.62592232E+004 1.86100503E-006 4938.47 <-- SCF

36 -3.62592232E+004 -1.08698837E-007 4957.47 <-- SCF

------------------------------------------------------------------------ <-- SCF

Final energy = -36259.22319243 eV

(energy not corrected for finite basis set)

*********************************** Forces ***********************************

* *

* Cartesian components (eV/A) *

* -------------------------------------------------------------------------- *

* x y z *

* *

* Se 1 0.01573 -0.25666 0.79608 *

* Se 2 -0.06680 0.23085 0.81126 *

* Se 3 -0.05066 0.21788 -0.72216 *

* Se 4 0.00042 -0.26018 -0.85171 *

* Se 5 0.00909 -0.04130 0.92223 *

* Se 6 -0.11172 0.22861 0.69588 *

* Se 7 -0.11205 0.22535 -0.61897 *

* Se 8 -0.00459 -0.04442 -0.98631 *

* Se 9 0.21490 -0.21722 0.78056 *

* Se 10 -0.25907 0.19892 0.84037 *

* Se 11 -0.21476 0.21759 -0.77997 *

* Se 12 0.25890 -0.19873 -0.83976 *

* Se 13 0.11248 -0.22503 0.61896 *

* Se 14 0.00461 0.04445 0.98678 *

* Se 15 -0.00869 0.04117 -0.92194 *

* Se 16 0.11222 -0.22837 -0.69569 *

* Se 17 0.05023 -0.21850 0.72253 *

* Se 18 -0.00092 0.26029 0.85179 *

* Se 19 -0.01656 0.25642 -0.79636 *

* Se 20 0.06656 -0.23136 -0.81170 *

* Nb 1 -0.09777 -0.00629 0.01328 *

* Nb 2 0.09728 0.00828 -0.01327 *

* Nb 3 0.00004 -0.00086 0.00098 *

* Nb 4 -0.00036 -0.00036 -0.00079 *

* Nb 5 -0.15500 -0.00016 0.00991 *

* Nb 6 0.14757 0.07895 -0.01484 *

* Nb 7 0.00826 -0.00782 0.01542 *

* Nb 8 0.00372 -0.00746 -0.01677 *

* Nb 9 -0.08124 -0.05083 0.01551 *

* Nb 10 0.10829 -0.01867 -0.01561 *

* Nb 11 -0.03512 0.04875 -0.00743 *

* Nb 12 -0.02895 0.04723 0.01158 *

* Nb 13 -0.10918 0.01768 0.01472 *

* Nb 14 0.08101 0.05112 -0.01630 *

* Nb 15 0.03412 -0.04943 0.00740 *

* Nb 16 0.02908 -0.04751 -0.01178 *

* Nb 17 -0.14554 -0.07853 0.01496 *

* Nb 18 0.15538 -0.00170 -0.01004 *

* Nb 19 -0.00761 0.00933 -0.01698 *

* Nb 20 -0.00333 0.00848 0.01818 *

* *

******************************************************************************

***************** Stress Tensor *****************

* *

* Cartesian components (GPa) *

* --------------------------------------------- *

* x y z *

* *

* x -0.575895 0.208814 -0.002481 *

* y 0.208814 -1.011609 -0.038614 *

* z -0.002481 -0.038614 2.790857 *

* *

* Pressure: -0.4011 *

* *

*************************************************

+------------+-------------+-------------+-----------------+ <-- min BFGS

| Step | lambda | F.delta | enthalpy | <-- min BFGS

+------------+-------------+-------------+-----------------+ <-- min BFGS

| previous | 0.000000 | 0.010377 | -36258.993578 | <-- min BFGS

| trial step | 1.000000 | 0.001812 | -36259.223284 | <-- min BFGS

+------------+-------------+-------------+-----------------+ <-- min BFGS

BFGS: finished iteration 6 with enthalpy= -3.62592233E+004 eV

+-----------+-----------------+-----------------+------------+-----+ <-- BFGS

| Parameter | value | tolerance | units | OK? | <-- BFGS

+-----------+-----------------+-----------------+------------+-----+ <-- BFGS

| dE/ion | 5.742643E-003 | 5.000000E-006 | eV | No | <-- BFGS

| |F|max | 9.877890E-001 | 1.000000E-002 | eV/A | No | <-- BFGS

| |dR|max | 8.227208E-003 | 5.000000E-004 | A | No | <-- BFGS

| Smax | 2.790857E+000 | 2.000000E-002 | GPa | No | <-- BFGS

+-----------+-----------------+-----------------+------------+-----+ <-- BFGS

================================================================================

Starting BFGS iteration 7 ...

================================================================================

+------------+-------------+-------------+-----------------+ <-- min BFGS

| Step | lambda | F.delta | enthalpy | <-- min BFGS

+------------+-------------+-------------+-----------------+ <-- min BFGS

| previous | 0.000000 | 0.002939 | -36259.223284 | <-- min BFGS

+------------+-------------+-------------+-----------------+ <-- min BFGS

--------------------------------------------------------------------------------

BFGS: starting iteration 7 with trial guess (lambda= 1.000000)

--------------------------------------------------------------------------------

-------------------------------

Unit Cell

-------------------------------

Real Lattice(A) Reciprocal Lattice(1/A)

14.8387145 -8.3730365 -0.0003602 0.4225453 -0.0015713 0.0000014

0.0125358 3.3709962 0.0001166 1.0495375 1.8599927 -0.0000392

-0.0000442 0.0003200 14.0052428 0.0000021 -0.0000155 0.4486309

Lattice parameters(A) Cell Angles

a = 17.038051 alpha = 89.996710

b = 3.371020 beta = 90.002012

c = 14.005243 gamma = 119.221653

Current cell volume = 702.029786 A**3

-------------------------------

Cell Contents

-------------------------------

xxxxxxxxxxxxxxxxxxxxxxxxxxxxxxxxxxxxxxxxxxxxxxxxxxxxxxxxxxxx

x Element Atom Fractional coordinates of atoms x

x Number u v w x

x----------------------------------------------------------x

x Se 1 0.066642 0.666078 0.121213 x

x Se 2 0.133275 0.334234 0.620945 x

x Se 3 0.133276 0.334197 0.878793 x

x Se 4 0.066634 0.666053 0.379056 x

x Se 5 0.266574 0.666653 0.121259 x

x Se 6 0.333188 0.333860 0.620899 x

x Se 7 0.333189 0.333850 0.878841 x

x Se 8 0.266562 0.666635 0.379006 x

x Se 9 0.467079 0.666708 0.121207 x

x Se 10 0.532898 0.333266 0.620943 x

x Se 11 0.532920 0.333290 0.878793 x

x Se 12 0.467101 0.666731 0.379057 x

x Se 13 0.666811 0.666150 0.121159 x

x Se 14 0.733438 0.333364 0.620994 x

x Se 15 0.733426 0.333346 0.878741 x

x Se 16 0.666811 0.666139 0.379101 x

x Se 17 0.866725 0.665804 0.121208 x

x Se 18 0.933367 0.333950 0.620944 x

x Se 19 0.933359 0.333924 0.878787 x

x Se 20 0.866726 0.665768 0.379055 x

x Nb 1 -0.000037 -0.000172 0.250032 x

x Nb 2 0.000038 0.000176 0.749968 x

x Nb 3 0.000001 0.000001 0.000000 x

x Nb 4 0.000001 0.000002 0.500000 x

x Nb 5 0.199955 -0.000130 0.250031 x

x Nb 6 0.200044 0.000269 0.749968 x

x Nb 7 0.199999 0.000046 0.000002 x

x Nb 8 0.199998 0.000046 0.499998 x

x Nb 9 0.399993 -0.000158 0.250032 x

x Nb 10 0.400037 0.000173 0.749968 x

x Nb 11 0.399984 -0.000005 0.000013 x

x Nb 12 0.399985 -0.000005 0.499988 x

x Nb 13 0.599962 -0.000178 0.250032 x

x Nb 14 0.600006 0.000156 0.749968 x

x Nb 15 0.600015 0.000002 -0.000012 x

x Nb 16 0.600014 0.000001 0.500012 x

x Nb 17 0.799957 -0.000268 0.250031 x

x Nb 18 0.800046 0.000131 0.749969 x

x Nb 19 0.800002 -0.000044 -0.000002 x

x Nb 20 0.800002 -0.000044 0.500002 x

xxxxxxxxxxxxxxxxxxxxxxxxxxxxxxxxxxxxxxxxxxxxxxxxxxxxxxxxxxxx

------------------------------------------------------------------------ <-- SCF

SCF loop Energy Energy gain Timer <-- SCF

per atom (sec) <-- SCF

------------------------------------------------------------------------ <-- SCF

Initial -3.62589592E+004 5061.03 <-- SCF

1 -3.62594415E+004 1.20573762E-002 5087.70 <-- SCF

2 -3.62594654E+004 5.98033241E-004 5118.47 <-- SCF

3 -3.62593680E+004 -2.43575253E-003 5146.86 <-- SCF

4 -3.62592694E+004 -2.46445150E-003 5174.45 <-- SCF

5 -3.62592681E+004 -3.27120848E-005 5201.92 <-- SCF

6 -3.62592671E+004 -2.56868977E-005 5227.30 <-- SCF

7 -3.62592671E+004 1.01965281E-006 5249.47 <-- SCF

8 -3.62592673E+004 4.00016990E-006 5268.02 <-- SCF

9 -3.62592674E+004 3.69680190E-006 5285.02 <-- SCF

10 -3.62592676E+004 3.48146826E-006 5301.69 <-- SCF

11 -3.62592677E+004 3.14454887E-006 5318.56 <-- SCF

12 -3.62592678E+004 2.85119663E-006 5335.53 <-- SCF

13 -3.62592679E+004 2.62704970E-006 5352.06 <-- SCF

14 -3.62592680E+004 2.39913247E-006 5369.06 <-- SCF

15 -3.62592681E+004 2.18789736E-006 5385.56 <-- SCF

16 -3.62592682E+004 1.97466704E-006 5402.62 <-- SCF

17 -3.62592682E+004 1.84245332E-006 5419.89 <-- SCF

18 -3.62592683E+004 1.72980754E-006 5436.78 <-- SCF

19 -3.62592684E+004 1.54345669E-006 5453.59 <-- SCF

20 -3.62592684E+004 1.40627731E-006 5470.50 <-- SCF

21 -3.62592685E+004 1.26435408E-006 5487.09 <-- SCF

22 -3.62592685E+004 1.13506811E-006 5503.33 <-- SCF

23 -3.62592686E+004 1.04356275E-006 5519.55 <-- SCF

24 -3.62592686E+004 9.27282024E-007 5535.38 <-- SCF

------------------------------------------------------------------------ <-- SCF

Final energy = -36259.26859952 eV

(energy not corrected for finite basis set)

*********************************** Forces ***********************************

* *

* Cartesian components (eV/A) *

* -------------------------------------------------------------------------- *

* x y z *

* *

* Se 1 0.01755 -0.24173 0.79153 *

* Se 2 -0.03760 0.22580 0.79485 *

* Se 3 -0.02438 0.21517 -0.70863 *

* Se 4 0.00432 -0.24844 -0.84792 *

* Se 5 0.00741 -0.03377 0.87476 *

* Se 6 -0.11530 0.21994 0.69602 *

* Se 7 -0.11644 0.21772 -0.62027 *

* Se 8 -0.00528 -0.03916 -0.93837 *

* Se 9 0.18843 -0.21155 0.75688 *

* Se 10 -0.22521 0.19617 0.80620 *

* Se 11 -0.18863 0.21155 -0.75673 *

* Se 12 0.22510 -0.19614 -0.80640 *

* Se 13 0.11644 -0.21759 0.62029 *

* Se 14 0.00548 0.03909 0.93819 *

* Se 15 -0.00723 0.03373 -0.87466 *

* Se 16 0.11541 -0.21984 -0.69605 *

* Se 17 0.02440 -0.21533 0.70861 *

* Se 18 -0.00441 0.24858 0.84786 *

* Se 19 -0.01758 0.24188 -0.79158 *

* Se 20 0.03749 -0.22600 -0.79465 *

* Nb 1 -0.10641 -0.02220 0.01870 *

* Nb 2 0.10616 0.02276 -0.01870 *

* Nb 3 0.00039 -0.00038 0.00006 *

* Nb 4 0.00027 -0.00040 -0.00003 *

* Nb 5 -0.10208 0.01570 0.02092 *

* Nb 6 0.06958 0.05214 -0.02144 *

* Nb 7 0.00555 -0.01146 0.00909 *

* Nb 8 0.00693 -0.00761 -0.00765 *

* Nb 9 -0.05868 -0.05195 0.02033 *

* Nb 10 0.08633 -0.00355 -0.01930 *

* Nb 11 -0.03944 0.04996 0.00859 *

* Nb 12 -0.04002 0.04785 -0.00941 *

* Nb 13 -0.08625 0.00386 0.01937 *

* Nb 14 0.05821 0.05216 -0.02044 *

* Nb 15 0.03933 -0.05035 -0.00847 *

* Nb 16 0.04013 -0.04816 0.00939 *

* Nb 17 -0.06930 -0.05259 0.02152 *

* Nb 18 0.10237 -0.01631 -0.02096 *

* Nb 19 -0.00580 0.01216 -0.00927 *

* Nb 20 -0.00727 0.00829 0.00778 *

* *

******************************************************************************

***************** Stress Tensor *****************

* *

* Cartesian components (GPa) *

* --------------------------------------------- *

* x y z *

* *

* x -0.789257 -0.142397 -0.050621 *

* y -0.142397 -1.557426 -0.017848 *

* z -0.050621 -0.017848 0.663853 *

* *

* Pressure: 0.5609 *

* *

*************************************************

+------------+-------------+-------------+-----------------+ <-- min BFGS

| Step | lambda | F.delta | enthalpy | <-- min BFGS

+------------+-------------+-------------+-----------------+ <-- min BFGS

| previous | 0.000000 | 0.002939 | -36259.223284 | <-- min BFGS

| trial step | 1.000000 | 0.001143 | -36259.268670 | <-- min BFGS

+------------+-------------+-------------+-----------------+ <-- min BFGS

--------------------------------------------------------------------------------

BFGS: improving iteration 7 with line minimization (lambda= 1.636097)

--------------------------------------------------------------------------------

-------------------------------

Unit Cell

-------------------------------

Real Lattice(A) Reciprocal Lattice(1/A)

14.8336646 -8.3754945 -0.0005813 0.4227315 -0.0014957 0.0000012

0.0119273 3.3709326 0.0002083 1.0503282 1.8602145 -0.0000789

-0.0000369 0.0006130 13.9607787 0.0000019 -0.0000278 0.4500598

Lattice parameters(A) Cell Angles

a = 17.034862 alpha = 89.993945

b = 3.370954 beta = 90.003324

c = 13.960779 gamma = 119.247538

Current cell volume = 699.479419 A**3

-------------------------------

Cell Contents

-------------------------------

xxxxxxxxxxxxxxxxxxxxxxxxxxxxxxxxxxxxxxxxxxxxxxxxxxxxxxxxxxxx

x Element Atom Fractional coordinates of atoms x

x Number u v w x

x----------------------------------------------------------x

x Se 1 0.066645 0.666013 0.121262 x

x Se 2 0.133270 0.334279 0.620995 x

x Se 3 0.133272 0.334242 0.878750 x

x Se 4 0.066636 0.665984 0.379002 x

x Se 5 0.266576 0.666641 0.121322 x

x Se 6 0.333181 0.333900 0.620940 x

x Se 7 0.333182 0.333889 0.878808 x

x Se 8 0.266563 0.666620 0.378937 x

x Se 9 0.467090 0.666688 0.121256 x

x Se 10 0.532884 0.333275 0.620998 x

x Se 11 0.532909 0.333310 0.878744 x

x Se 12 0.467115 0.666722 0.379002 x

x Se 13 0.666818 0.666111 0.121192 x

x Se 14 0.733437 0.333379 0.621063 x

x Se 15 0.733424 0.333358 0.878678 x

x Se 16 0.666819 0.666099 0.379060 x

x Se 17 0.866728 0.665760 0.121250 x

x Se 18 0.933365 0.334019 0.620998 x

x Se 19 0.933356 0.333989 0.878738 x

x Se 20 0.866731 0.665722 0.379004 x

x Nb 1 -0.000044 -0.000191 0.250033 x

x Nb 2 0.000045 0.000195 0.749967 x

x Nb 3 0.000001 0.000000 0.000001 x

x Nb 4 0.000001 0.000002 0.500000 x

x Nb 5 0.199944 -0.000157 0.250032 x

x Nb 6 0.200053 0.000314 0.749967 x

x Nb 7 0.199999 0.000045 0.000004 x

x Nb 8 0.199998 0.000044 0.499996 x

x Nb 9 0.399988 -0.000185 0.250033 x

x Nb 10 0.400044 0.000187 0.749967 x

x Nb 11 0.399982 0.000003 0.000012 x

x Nb 12 0.399983 0.000003 0.499989 x

x Nb 13 0.599954 -0.000192 0.250033 x

x Nb 14 0.600011 0.000184 0.749967 x

x Nb 15 0.600017 -0.000006 -0.000011 x

x Nb 16 0.600016 -0.000007 0.500011 x

x Nb 17 0.799947 -0.000313 0.250033 x

x Nb 18 0.800056 0.000157 0.749968 x

x Nb 19 0.800001 -0.000043 -0.000003 x

x Nb 20 0.800002 -0.000042 0.500004 x

xxxxxxxxxxxxxxxxxxxxxxxxxxxxxxxxxxxxxxxxxxxxxxxxxxxxxxxxxxxx

------------------------------------------------------------------------ <-- SCF

SCF loop Energy Energy gain Timer <-- SCF

per atom (sec) <-- SCF

------------------------------------------------------------------------ <-- SCF

Initial -3.62591572E+004 5638.64 <-- SCF

1 -3.62593453E+004 4.70072254E-003 5664.77 <-- SCF

2 -3.62593560E+004 2.68616870E-004 5695.14 <-- SCF

3 -3.62593095E+004 -1.16207829E-003 5722.16 <-- SCF

4 -3.62592824E+004 -6.77857795E-004 5749.45 <-- SCF

5 -3.62592812E+004 -3.08024493E-005 5776.06 <-- SCF

6 -3.62592809E+004 -6.14462092E-006 5797.53 <-- SCF

7 -3.62592810E+004 2.96683482E-006 5816.52 <-- SCF

8 -3.62592812E+004 2.74562957E-006 5832.67 <-- SCF

9 -3.62592812E+004 2.18349969E-006 5848.89 <-- SCF

10 -3.62592813E+004 1.83593670E-006 5865.16 <-- SCF

11 -3.62592814E+004 1.53847232E-006 5881.44 <-- SCF

12 -3.62592814E+004 1.33498043E-006 5898.09 <-- SCF

13 -3.62592815E+004 1.07500215E-006 5914.42 <-- SCF

14 -3.62592815E+004 9.52293124E-007 5930.53 <-- SCF

15 -3.62592815E+004 7.31487258E-007 5947.09 <-- SCF

------------------------------------------------------------------------ <-- SCF

Final energy = -36259.28153648 eV

(energy not corrected for finite basis set)

*********************************** Forces ***********************************

* *

* Cartesian components (eV/A) *

* -------------------------------------------------------------------------- *

* x y z *

* *

* Se 1 0.02619 -0.23062 0.79014 *

* Se 2 -0.01457 0.22125 0.78760 *

* Se 3 -0.00618 0.21020 -0.70301 *

* Se 4 0.01094 -0.23970 -0.84870 *

* Se 5 0.01142 -0.03364 0.84378 *

* Se 6 -0.12306 0.21656 0.69497 *

* Se 7 -0.13019 0.21601 -0.61854 *

* Se 8 -0.00443 -0.03901 -0.90511 *

* Se 9 0.17130 -0.20781 0.75136 *

* Se 10 -0.20153 0.19489 0.79572 *

* Se 11 -0.17114 0.20781 -0.75128 *

* Se 12 0.20179 -0.19484 -0.79588 *

* Se 13 0.13016 -0.21594 0.61839 *

* Se 14 0.00432 0.03897 0.90504 *

* Se 15 -0.01153 0.03362 -0.84373 *

* Se 16 0.12307 -0.21651 -0.69484 *

* Se 17 0.00608 -0.21027 0.70304 *

* Se 18 -0.01090 0.23979 0.84870 *

* Se 19 -0.02615 0.23073 -0.79022 *

* Se 20 0.01437 -0.22136 -0.78752 *

* Nb 1 -0.07980 -0.02485 0.01873 *

* Nb 2 0.07929 0.02530 -0.01875 *

* Nb 3 0.00014 -0.00030 0.00010 *

* Nb 4 0.00012 -0.00029 -0.00008 *

* Nb 5 -0.10700 0.00938 0.02034 *

* Nb 6 0.06211 0.04796 -0.02010 *

* Nb 7 0.00019 -0.00128 0.01077 *

* Nb 8 0.00010 0.00078 -0.01054 *

* Nb 9 -0.03166 -0.04613 0.02084 *

* Nb 10 0.08008 0.00829 -0.01951 *

* Nb 11 -0.02727 0.03722 0.00749 *

* Nb 12 -0.02870 0.03564 -0.00984 *

* Nb 13 -0.08025 -0.00807 0.01961 *

* Nb 14 0.03151 0.04630 -0.02087 *

* Nb 15 0.02730 -0.03750 -0.00749 *

* Nb 16 0.02880 -0.03591 0.00986 *

* Nb 17 -0.06156 -0.04832 0.02015 *

* Nb 18 0.10731 -0.00979 -0.02034 *

* Nb 19 -0.00034 0.00176 -0.01097 *

* Nb 20 -0.00030 -0.00032 0.01072 *

* *

******************************************************************************

***************** Stress Tensor *****************

* *

* Cartesian components (GPa) *

* --------------------------------------------- *

* x y z *

* *

* x -1.278844 -0.166542 -0.014357 *

* y -0.166542 -1.846788 -0.001063 *

* z -0.014357 -0.001063 -0.284083 *

* *

* Pressure: 1.1366 *

* *

*************************************************

+------------+-------------+-------------+-----------------+ <-- min BFGS

| Step | lambda | F.delta | enthalpy | <-- min BFGS

+------------+-------------+-------------+-----------------+ <-- min BFGS

| previous | 0.000000 | 0.002939 | -36259.223284 | <-- min BFGS

| trial step | 1.000000 | 0.001143 | -36259.268670 | <-- min BFGS

| line step | 1.636097 | 0.000309 | -36259.281654 | <-- min BFGS

+------------+-------------+-------------+-----------------+ <-- min BFGS

BFGS: finished iteration 7 with enthalpy= -3.62592817E+004 eV

+-----------+-----------------+-----------------+------------+-----+ <-- BFGS

| Parameter | value | tolerance | units | OK? | <-- BFGS

+-----------+-----------------+-----------------+------------+-----+ <-- BFGS

| dE/ion | 1.459257E-003 | 5.000000E-006 | eV | No | <-- BFGS

| |F|max | 9.059638E-001 | 1.000000E-002 | eV/A | No | <-- BFGS

| |dR|max | 2.502912E-003 | 5.000000E-004 | A | No | <-- BFGS

| Smax | 1.846788E+000 | 2.000000E-002 | GPa | No | <-- BFGS

+-----------+-----------------+-----------------+------------+-----+ <-- BFGS

================================================================================

Starting BFGS iteration 8 ...

================================================================================

+------------+-------------+-------------+-----------------+ <-- min BFGS

| Step | lambda | F.delta | enthalpy | <-- min BFGS

+------------+-------------+-------------+-----------------+ <-- min BFGS

| previous | 0.000000 | 0.002381 | -36259.281654 | <-- min BFGS

+------------+-------------+-------------+-----------------+ <-- min BFGS

--------------------------------------------------------------------------------

BFGS: starting iteration 8 with trial guess (lambda= 1.000000)

--------------------------------------------------------------------------------

-------------------------------

Unit Cell

-------------------------------

Real Lattice(A) Reciprocal Lattice(1/A)

14.8198460 -8.3672056 -0.0007118 0.4230937 -0.0015538 -0.0000028

0.0123706 3.3683705 0.0003301 1.0509866 1.8614888 -0.0001405

0.0000963 0.0009989 13.9556420 -0.0000033 -0.0000441 0.4502255

Lattice parameters(A) Cell Angles

a = 17.018753 alpha = 89.990283

b = 3.368393 beta = 90.004068

c = 13.955642 gamma = 119.238417

Current cell volume = 698.092464 A**3

-------------------------------

Cell Contents

-------------------------------

xxxxxxxxxxxxxxxxxxxxxxxxxxxxxxxxxxxxxxxxxxxxxxxxxxxxxxxxxxxx

x Element Atom Fractional coordinates of atoms x

x Number u v w x

x----------------------------------------------------------x

x Se 1 0.066651 0.665828 0.121602 x

x Se 2 0.133260 0.334455 0.621323 x

x Se 3 0.133263 0.334410 0.878428 x

x Se 4 0.066638 0.665786 0.378663 x

x Se 5 0.266576 0.666618 0.121691 x

x Se 6 0.333153 0.334024 0.621242 x

x Se 7 0.333154 0.334009 0.878511 x

x Se 8 0.266559 0.666586 0.378567 x

x Se 9 0.467139 0.666628 0.121593 x

x Se 10 0.532827 0.333308 0.621333 x

x Se 11 0.532860 0.333370 0.878407 x

x Se 12 0.467172 0.666689 0.378667 x

x Se 13 0.666846 0.665991 0.121490 x

x Se 14 0.733441 0.333413 0.621433 x

x Se 15 0.733424 0.333381 0.878309 x

x Se 16 0.666846 0.665975 0.378758 x

x Se 17 0.866737 0.665591 0.121572 x

x Se 18 0.933363 0.334218 0.621337 x

x Se 19 0.933350 0.334174 0.878399 x

x Se 20 0.866741 0.665546 0.378676 x

x Nb 1 -0.000061 -0.000251 0.250038 x

x Nb 2 0.000062 0.000256 0.749962 x

x Nb 3 0.000001 0.000000 0.000001 x

x Nb 4 0.000001 0.000001 0.499999 x

x Nb 5 0.199919 -0.000217 0.250038 x

x Nb 6 0.200073 0.000417 0.749961 x

x Nb 7 0.200000 0.000046 0.000007 x

x Nb 8 0.199999 0.000045 0.499993 x

x Nb 9 0.399978 -0.000253 0.250039 x

x Nb 10 0.400063 0.000237 0.749961 x

x Nb 11 0.399976 0.000020 0.000013 x

x Nb 12 0.399977 0.000020 0.499988 x

x Nb 13 0.599936 -0.000241 0.250039 x

x Nb 14 0.600021 0.000251 0.749961 x

x Nb 15 0.600023 -0.000024 -0.000012 x

x Nb 16 0.600022 -0.000024 0.500011 x

x Nb 17 0.799928 -0.000415 0.250038 x

x Nb 18 0.800082 0.000217 0.749963 x

x Nb 19 0.800001 -0.000042 -0.000007 x

x Nb 20 0.800002 -0.000042 0.500007 x

xxxxxxxxxxxxxxxxxxxxxxxxxxxxxxxxxxxxxxxxxxxxxxxxxxxxxxxxxxxx

------------------------------------------------------------------------ <-- SCF

SCF loop Energy Energy gain Timer <-- SCF

per atom (sec) <-- SCF

------------------------------------------------------------------------ <-- SCF

Initial -3.62592162E+004 6049.84 <-- SCF

1 -3.62599140E+004 1.74449345E-002 6077.72 <-- SCF

2 -3.62599463E+004 8.09867384E-004 6105.97 <-- SCF

3 -3.62598850E+004 -1.53396734E-003 6133.09 <-- SCF

4 -3.62593279E+004 -1.39272681E-002 6159.22 <-- SCF

5 -3.62593438E+004 3.96823333E-004 6188.48 <-- SCF

6 -3.62593400E+004 -9.52246297E-005 6213.31 <-- SCF

7 -3.62593402E+004 6.78540669E-006 6236.41 <-- SCF

8 -3.62593404E+004 4.85699309E-006 6254.47 <-- SCF

9 -3.62593405E+004 1.33947508E-006 6270.81 <-- SCF

10 -3.62593405E+004 1.61569726E-006 6288.17 <-- SCF

11 -3.62593406E+004 1.34837870E-006 6304.62 <-- SCF

12 -3.62593406E+004 9.28575912E-007 6320.81 <-- SCF

13 -3.62593407E+004 7.09047384E-007 6337.14 <-- SCF

------------------------------------------------------------------------ <-- SCF

Final energy = -36259.34066764 eV

(energy not corrected for finite basis set)

*********************************** Forces ***********************************

* *

* Cartesian components (eV/A) *

* -------------------------------------------------------------------------- *

* x y z *

* *

* Se 1 0.02030 -0.20352 0.70319 *

* Se 2 0.00084 0.19928 0.66593 *

* Se 3 0.00131 0.18124 -0.60419 *

* Se 4 0.02451 -0.21234 -0.76042 *

* Se 5 0.02964 -0.03341 0.74560 *

* Se 6 -0.12423 0.20422 0.59351 *

* Se 7 -0.13001 0.20280 -0.53550 *

* Se 8 0.02163 -0.03344 -0.80022 *

* Se 9 0.12723 -0.22842 0.66570 *

* Se 10 -0.15077 0.21283 0.71554 *

* Se 11 -0.12709 0.22839 -0.66565 *

* Se 12 0.15098 -0.21282 -0.71571 *

* Se 13 0.12995 -0.20276 0.53539 *

* Se 14 -0.02174 0.03337 0.80015 *

* Se 15 -0.02977 0.03337 -0.74558 *

* Se 16 0.12423 -0.20419 -0.59344 *

* Se 17 -0.00137 -0.18125 0.60426 *

* Se 18 -0.02445 0.21242 0.76051 *

* Se 19 -0.02022 0.20363 -0.70332 *

* Se 20 -0.00099 -0.19932 -0.66588 *

* Nb 1 -0.07682 -0.02913 0.01867 *

* Nb 2 0.07621 0.02948 -0.01869 *

* Nb 3 0.00012 -0.00027 0.00006 *

* Nb 4 0.00012 -0.00026 -0.00005 *

* Nb 5 -0.10805 0.00727 0.02016 *

* Nb 6 0.06171 0.04949 -0.01964 *

* Nb 7 -0.00131 0.00269 0.01275 *

* Nb 8 -0.00131 0.00483 -0.01227 *

* Nb 9 -0.02628 -0.04582 0.02078 *

* Nb 10 0.07195 0.01629 -0.01900 *

* Nb 11 -0.02674 0.03360 0.01075 *

* Nb 12 -0.02890 0.03245 -0.01327 *

* Nb 13 -0.07213 -0.01612 0.01911 *

* Nb 14 0.02621 0.04599 -0.02077 *

* Nb 15 0.02683 -0.03379 -0.01073 *

* Nb 16 0.02900 -0.03265 0.01327 *

* Nb 17 -0.06117 -0.04984 0.01967 *

* Nb 18 0.10835 -0.00759 -0.02018 *

* Nb 19 0.00112 -0.00228 -0.01296 *

* Nb 20 0.00110 -0.00443 0.01248 *

* *

******************************************************************************

***************** Stress Tensor *****************

* *

* Cartesian components (GPa) *

* --------------------------------------------- *

* x y z *

* *

* x -1.564601 -0.147510 -0.004549 *

* y -0.147510 -2.060275 0.009145 *

* z -0.004549 0.009145 -0.586896 *

* *

* Pressure: 1.4039 *

* *

*************************************************

+------------+-------------+-------------+-----------------+ <-- min BFGS

| Step | lambda | F.delta | enthalpy | <-- min BFGS

+------------+-------------+-------------+-----------------+ <-- min BFGS

| previous | 0.000000 | 0.002381 | -36259.281654 | <-- min BFGS

| trial step | 1.000000 | 0.001960 | -36259.340776 | <-- min BFGS

+------------+-------------+-------------+-----------------+ <-- min BFGS

--------------------------------------------------------------------------------

BFGS: improving iteration 8 with line minimization (lambda= 5.658613)

--------------------------------------------------------------------------------

-------------------------------

Unit Cell

-------------------------------

Real Lattice(A) Reciprocal Lattice(1/A)

14.7554709 -8.3285911 -0.0013197 0.4247895 -0.0018270 -0.0000215

0.0144359 3.3564345 0.0008977 1.0540644 1.8674487 -0.0004291

0.0007170 0.0027964 13.9317121 -0.0000277 -0.0001205 0.4509988

Lattice parameters(A) Cell Angles

a = 16.943711 alpha = 89.973163

b = 3.356466 beta = 90.007548

c = 13.931712 gamma = 119.195735

Current cell volume = 691.653770 A**3

-------------------------------

Cell Contents

-------------------------------

xxxxxxxxxxxxxxxxxxxxxxxxxxxxxxxxxxxxxxxxxxxxxxxxxxxxxxxxxxxx

x Element Atom Fractional coordinates of atoms x

x Number u v w x

x----------------------------------------------------------x

x Se 1 0.066677 0.664966 0.123184 x

x Se 2 0.133210 0.335274 0.622852 x

x Se 3 0.133222 0.335196 0.876929 x

x Se 4 0.066647 0.664861 0.377083 x

x Se 5 0.266575 0.666511 0.123410 x

x Se 6 0.333025 0.334602 0.622649 x

x Se 7 0.333023 0.334567 0.877125 x

x Se 8 0.266541 0.666428 0.376844 x

x Se 9 0.467368 0.666350 0.123161 x

x Se 10 0.532562 0.333461 0.622893 x

x Se 11 0.532631 0.333648 0.876840 x

x Se 12 0.467437 0.666537 0.377107 x

x Se 13 0.666977 0.665434 0.122875 x

x Se 14 0.733458 0.333570 0.623156 x

x Se 15 0.733425 0.333488 0.876591 x

x Se 16 0.666974 0.665398 0.377351 x

x Se 17 0.866778 0.664803 0.123072 x

x Se 18 0.933354 0.335143 0.622917 x

x Se 19 0.933324 0.335036 0.876816 x

x Se 20 0.866791 0.664726 0.377147 x

x Nb 1 -0.000142 -0.000532 0.250064 x

x Nb 2 0.000142 0.000540 0.749936 x

x Nb 3 0.000001 -0.000002 0.000001 x

x Nb 4 0.000001 0.000000 0.499999 x

x Nb 5 0.199802 -0.000500 0.250062 x

x Nb 6 0.200165 0.000897 0.749934 x

x Nb 7 0.200002 0.000048 0.000021 x

x Nb 8 0.199999 0.000048 0.499978 x

x Nb 9 0.399932 -0.000567 0.250067 x

x Nb 10 0.400149 0.000465 0.749933 x

x Nb 11 0.399948 0.000100 0.000015 x

x Nb 12 0.399951 0.000099 0.499986 x

x Nb 13 0.599849 -0.000472 0.250066 x

x Nb 14 0.600067 0.000566 0.749932 x

x Nb 15 0.600051 -0.000107 -0.000015 x

x Nb 16 0.600048 -0.000104 0.500013 x

x Nb 17 0.799837 -0.000892 0.250066 x

x Nb 18 0.800199 0.000497 0.749938 x

x Nb 19 0.799999 -0.000042 -0.000022 x

x Nb 20 0.800001 -0.000042 0.500023 x

xxxxxxxxxxxxxxxxxxxxxxxxxxxxxxxxxxxxxxxxxxxxxxxxxxxxxxxxxxxx

------------------------------------------------------------------------ <-- SCF

SCF loop Energy Energy gain Timer <-- SCF

per atom (sec) <-- SCF

------------------------------------------------------------------------ <-- SCF

Initial -3.62567683E+004 6440.28 <-- SCF

1 -3.62718740E+004 3.77642883E-001 6467.77 <-- SCF

2 -3.62727019E+004 2.06979343E-002 6496.56 <-- SCF

3 -3.62702898E+004 -6.03034638E-002 6523.39 <-- SCF

4 -3.62592887E+004 -2.75027850E-001 6550.17 <-- SCF

5 -3.62595404E+004 6.29273490E-003 6579.28 <-- SCF

6 -3.62594773E+004 -1.57723043E-003 6606.34 <-- SCF

7 -3.62594864E+004 2.29239272E-004 6633.77 <-- SCF

8 -3.62594888E+004 5.88834452E-005 6658.89 <-- SCF

9 -3.62594891E+004 6.69621780E-006 6682.20 <-- SCF

10 -3.62594899E+004 2.18030416E-005 6701.95 <-- SCF

11 -3.62594904E+004 1.14325965E-005 6719.81 <-- SCF

12 -3.62594907E+004 6.46152085E-006 6736.42 <-- SCF

13 -3.62594908E+004 3.62294152E-006 6753.47 <-- SCF

14 -3.62594909E+004 1.99526933E-006 6770.72 <-- SCF

15 -3.62594909E+004 1.19906198E-006 6787.45 <-- SCF

16 -3.62594910E+004 7.17473822E-007 6804.27 <-- SCF

------------------------------------------------------------------------ <-- SCF

Final energy = -36259.49095494 eV

(energy not corrected for finite basis set)

*********************************** Forces ***********************************

* *

* Cartesian components (eV/A) *

* -------------------------------------------------------------------------- *

* x y z *

* *

* Se 1 0.07212 -0.05235 0.39833 *

* Se 2 -0.04539 0.12710 0.35981 *

* Se 3 -0.06594 0.12266 -0.35834 *

* Se 4 0.04553 -0.06923 -0.40354 *

* Se 5 0.10533 -0.02794 0.42988 *

* Se 6 -0.14221 0.14341 0.34635 *

* Se 7 -0.12989 0.14121 -0.32497 *

* Se 8 0.11179 -0.01867 -0.47310 *

* Se 9 0.03700 -0.07831 0.44420 *

* Se 10 -0.03910 0.10572 0.43768 *

* Se 11 -0.03696 0.07834 -0.44408 *

* Se 12 0.03919 -0.10578 -0.43777 *

* Se 13 0.12979 -0.14122 0.32485 *

* Se 14 -0.11190 0.01863 0.47307 *

* Se 15 -0.10558 0.02792 -0.42995 *

* Se 16 0.14209 -0.14342 -0.34635 *

* Se 17 0.06603 -0.12259 0.35852 *

* Se 18 -0.04533 0.06934 0.40344 *

* Se 19 -0.07191 0.05247 -0.39834 *

* Se 20 0.04548 -0.12704 -0.35995 *

* Nb 1 -0.07027 -0.05002 0.01336 *

* Nb 2 0.06978 0.05011 -0.01336 *

* Nb 3 0.00004 -0.00017 -0.00003 *

* Nb 4 0.00007 -0.00017 0.00000 *

* Nb 5 -0.11311 0.00052 0.01613 *

* Nb 6 0.05983 0.06534 -0.01545 *

* Nb 7 -0.00499 0.01161 0.02054 *

* Nb 8 -0.00628 0.01513 -0.01828 *

* Nb 9 -0.00240 -0.05296 0.01821 *

* Nb 10 0.03190 0.04823 -0.01325 *

* Nb 11 -0.02965 0.02945 0.02420 *

* Nb 12 -0.03466 0.02855 -0.02894 *

* Nb 13 -0.03216 -0.04810 0.01343 *

* Nb 14 0.00250 0.05314 -0.01822 *

* Nb 15 0.02974 -0.02956 -0.02417 *

* Nb 16 0.03475 -0.02867 0.02897 *

* Nb 17 -0.05942 -0.06557 0.01549 *

* Nb 18 0.11326 -0.00064 -0.01613 *

* Nb 19 0.00484 -0.01147 -0.02062 *

* Nb 20 0.00609 -0.01501 0.01835 *

* *

******************************************************************************

***************** Stress Tensor *****************

* *

* Cartesian components (GPa) *

* --------------------------------------------- *

* x y z *

* *

* x -2.899786 -0.121044 0.007094 *

* y -0.121044 -3.297090 0.041067 *

* z 0.007094 0.041067 -1.865399 *

* *

* Pressure: 2.6874 *

* *

*************************************************

+------------+-------------+-------------+-----------------+ <-- min BFGS

| Step | lambda | F.delta | enthalpy | <-- min BFGS

+------------+-------------+-------------+-----------------+ <-- min BFGS

| previous | 0.000000 | 0.002381 | -36259.281654 | <-- min BFGS

| trial step | 1.000000 | 0.001960 | -36259.340776 | <-- min BFGS

| line step | 5.658613 | 0.000532 | -36259.491081 | <-- min BFGS

+------------+-------------+-------------+-----------------+ <-- min BFGS

BFGS: finished iteration 8 with enthalpy= -3.62594911E+004 eV

+-----------+-----------------+-----------------+------------+-----+ <-- BFGS

| Parameter | value | tolerance | units | OK? | <-- BFGS

+-----------+-----------------+-----------------+------------+-----+ <-- BFGS

| dE/ion | 5.235653E-003 | 5.000000E-006 | eV | No | <-- BFGS

| |F|max | 4.864851E-001 | 1.000000E-002 | eV/A | No | <-- BFGS

| |dR|max | 2.915907E-002 | 5.000000E-004 | A | No | <-- BFGS

| Smax | 3.297090E+000 | 2.000000E-002 | GPa | No | <-- BFGS

+-----------+-----------------+-----------------+------------+-----+ <-- BFGS

================================================================================

Starting BFGS iteration 9 ...

================================================================================

+------------+-------------+-------------+-----------------+ <-- min BFGS

| Step | lambda | F.delta | enthalpy | <-- min BFGS

+------------+-------------+-------------+-----------------+ <-- min BFGS

| previous | 0.000000 | 0.009842 | -36259.491081 | <-- min BFGS

+------------+-------------+-------------+-----------------+ <-- min BFGS

--------------------------------------------------------------------------------

BFGS: starting iteration 9 with trial guess (lambda= 1.000000)

--------------------------------------------------------------------------------

-------------------------------

Unit Cell

-------------------------------

Real Lattice(A) Reciprocal Lattice(1/A)

14.8012720 -8.3636091 -0.0014680 0.4232847 -0.0021562 -0.0000371

0.0171926 3.3751145 0.0012329 1.0489090 1.8562785 -0.0006064

0.0012410 0.0038480 13.9269336 -0.0000482 -0.0001646 0.4511536

Lattice parameters(A) Cell Angles

a = 17.000812 alpha = 89.963214

b = 3.375159 beta = 90.008291

c = 13.926934 gamma = 119.177203

Current cell volume = 697.736235 A**3

-------------------------------

Cell Contents

-------------------------------

xxxxxxxxxxxxxxxxxxxxxxxxxxxxxxxxxxxxxxxxxxxxxxxxxxxxxxxxxxxx

x Element Atom Fractional coordinates of atoms x

x Number u v w x

x----------------------------------------------------------x

x Se 1 0.066700 0.664188 0.124441 x

x Se 2 0.133169 0.336054 0.624080 x

x Se 3 0.133187 0.335937 0.875752 x

x Se 4 0.066653 0.664011 0.375803 x

x Se 5 0.266582 0.666422 0.124780 x

x Se 6 0.332905 0.335156 0.623768 x

x Se 7 0.332901 0.335102 0.876052 x

x Se 8 0.266533 0.666300 0.375442 x

x Se 9 0.467563 0.666056 0.124405 x

x Se 10 0.532334 0.333655 0.624153 x

x Se 11 0.532436 0.333944 0.875596 x

x Se 12 0.467665 0.666343 0.375848 x

x Se 13 0.667099 0.664899 0.123948 x

x Se 14 0.733466 0.333698 0.624558 x

x Se 15 0.733418 0.333577 0.875221 x

x Se 16 0.667095 0.664844 0.376232 x

x Se 17 0.866814 0.664061 0.124249 x

x Se 18 0.933348 0.335993 0.624197 x

x Se 19 0.933300 0.335813 0.875559 x

x Se 20 0.866832 0.663945 0.375919 x

x Nb 1 -0.000219 -0.000810 0.250087 x

x Nb 2 0.000219 0.000821 0.749913 x

x Nb 3 0.000001 -0.000003 0.000002 x

x Nb 4 0.000001 -0.000001 0.499999 x

x Nb 5 0.199691 -0.000768 0.250085 x

x Nb 6 0.200250 0.001349 0.749909 x

x Nb 7 0.200004 0.000052 0.000036 x

x Nb 8 0.199999 0.000053 0.499962 x

x Nb 9 0.399891 -0.000859 0.250093 x

x Nb 10 0.400228 0.000686 0.749909 x

x Nb 11 0.399921 0.000179 0.000020 x

x Nb 12 0.399924 0.000174 0.499981 x

x Nb 13 0.599769 -0.000695 0.250090 x

x Nb 14 0.600108 0.000859 0.749906 x

x Nb 15 0.600078 -0.000187 -0.000020 x

x Nb 16 0.600074 -0.000180 0.500018 x

x Nb 17 0.799752 -0.001342 0.250090 x

x Nb 18 0.800311 0.000762 0.749915 x

x Nb 19 0.799997 -0.000042 -0.000038 x

x Nb 20 0.800001 -0.000045 0.500039 x

xxxxxxxxxxxxxxxxxxxxxxxxxxxxxxxxxxxxxxxxxxxxxxxxxxxxxxxxxxxx

------------------------------------------------------------------------ <-- SCF

SCF loop Energy Energy gain Timer <-- SCF

per atom (sec) <-- SCF

------------------------------------------------------------------------ <-- SCF

Initial -3.62576723E+004 6906.66 <-- SCF

1 -3.62678746E+004 2.55055931E-001 6935.23 <-- SCF

2 -3.62683910E+004 1.29107342E-002 6964.72 <-- SCF

3 -3.62676912E+004 -1.74956822E-002 6991.62 <-- SCF

4 -3.62595407E+004 -2.03760500E-001 7017.78 <-- SCF

5 -3.62597324E+004 4.79253476E-003 7047.08 <-- SCF

6 -3.62596852E+004 -1.18002835E-003 7074.45 <-- SCF

7 -3.62596866E+004 3.45841452E-005 7102.98 <-- SCF

8 -3.62596891E+004 6.05541466E-005 7127.22 <-- SCF

9 -3.62596893E+004 6.99351033E-006 7151.03 <-- SCF

10 -3.62596901E+004 1.82022911E-005 7170.08 <-- SCF

11 -3.62596905E+004 1.05752422E-005 7188.20 <-- SCF

12 -3.62596908E+004 6.84748564E-006 7207.44 <-- SCF

13 -3.62596909E+004 4.19318663E-006 7224.48 <-- SCF

14 -3.62596910E+004 2.59272925E-006 7241.75 <-- SCF

15 -3.62596911E+004 1.96323458E-006 7258.94 <-- SCF

16 -3.62596912E+004 1.39766695E-006 7275.97 <-- SCF

17 -3.62596912E+004 1.01875722E-006 7293.41 <-- SCF

18 -3.62596912E+004 8.10086061E-007 7310.97 <-- SCF

------------------------------------------------------------------------ <-- SCF

Final energy = -36259.69123809 eV

(energy not corrected for finite basis set)

*********************************** Forces ***********************************

* *

* Cartesian components (eV/A) *

* -------------------------------------------------------------------------- *

* x y z *

* *

* Se 1 0.09266 0.04827 0.19855 *

* Se 2 -0.13803 -0.01781 0.20926 *

* Se 3 -0.14779 -0.02656 -0.20545 *

* Se 4 0.10351 0.03364 -0.19925 *

* Se 5 0.06775 0.00967 0.22576 *

* Se 6 -0.12335 0.06781 0.14539 *

* Se 7 -0.13038 0.05113 -0.15550 *

* Se 8 0.07325 0.00025 -0.23444 *

* Se 9 -0.09214 0.03808 0.27359 *

* Se 10 0.10187 -0.03117 0.28803 *

* Se 11 0.09235 -0.03811 -0.27363 *

* Se 12 -0.10164 0.03107 -0.28820 *

* Se 13 0.13033 -0.05120 0.15534 *

* Se 14 -0.07338 -0.00045 0.23446 *

* Se 15 -0.06802 -0.00978 -0.22583 *

* Se 16 0.12323 -0.06790 -0.14536 *

* Se 17 0.14777 0.02678 0.20551 *

* Se 18 -0.10343 -0.03349 0.19924 *

* Se 19 -0.09245 -0.04817 -0.19864 *

* Se 20 0.13800 0.01806 -0.20927 *

* Nb 1 -0.05149 -0.06376 0.00403 *

* Nb 2 0.05098 0.06396 -0.00398 *

* Nb 3 0.00007 -0.00027 -0.00001 *

* Nb 4 0.00010 -0.00025 -0.00002 *

* Nb 5 -0.10095 -0.00095 0.01045 *

* Nb 6 0.04948 0.07849 -0.01052 *

* Nb 7 -0.00277 0.00998 0.02614 *

* Nb 8 -0.00222 0.01505 -0.02248 *

* Nb 9 0.03300 -0.06250 0.01446 *

* Nb 10 -0.01460 0.06726 -0.00593 *

* Nb 11 -0.03126 0.03563 0.03079 *

* Nb 12 -0.03821 0.03329 -0.03766 *

* Nb 13 0.01417 -0.06710 0.00620 *

* Nb 14 -0.03269 0.06279 -0.01453 *

* Nb 15 0.03138 -0.03576 -0.03070 *

* Nb 16 0.03836 -0.03343 0.03768 *

* Nb 17 -0.04894 -0.07888 0.01061 *

* Nb 18 0.10097 0.00068 -0.01039 *

* Nb 19 0.00258 -0.00961 -0.02621 *

* Nb 20 0.00194 -0.01472 0.02254 *

* *

******************************************************************************

***************** Stress Tensor *****************

* *

* Cartesian components (GPa) *

* --------------------------------------------- *

* x y z *

* *

* x -1.582801 -0.044740 0.018869 *

* y -0.044740 -1.425835 0.069756 *

* z 0.018869 0.069756 -0.563523 *

* *

* Pressure: 1.1907 *

* *

*************************************************

+------------+-------------+-------------+-----------------+ <-- min BFGS

| Step | lambda | F.delta | enthalpy | <-- min BFGS

+------------+-------------+-------------+-----------------+ <-- min BFGS

| previous | 0.000000 | 0.009842 | -36259.491081 | <-- min BFGS

| trial step | 1.000000 | 0.004898 | -36259.691370 | <-- min BFGS

+------------+-------------+-------------+-----------------+ <-- min BFGS

--------------------------------------------------------------------------------

BFGS: improving iteration 9 with line minimization (lambda= 1.990689)

--------------------------------------------------------------------------------

-------------------------------

Unit Cell

-------------------------------

Real Lattice(A) Reciprocal Lattice(1/A)

14.8466466 -8.3983010 -0.0016149 0.4218049 -0.0024764 -0.0000525

0.0199236 3.3936206 0.0015649 1.0438541 1.8453415 -0.0007801

0.0017601 0.0048899 13.9221995 -0.0000684 -0.0002077 0.4513070

Lattice parameters(A) Cell Angles

a = 17.057385 alpha = 89.953413

b = 3.393679 beta = 90.009028

c = 13.922201 gamma = 119.159159

Current cell volume = 703.783919 A**3

-------------------------------

Cell Contents

-------------------------------

xxxxxxxxxxxxxxxxxxxxxxxxxxxxxxxxxxxxxxxxxxxxxxxxxxxxxxxxxxxx

x Element Atom Fractional coordinates of atoms x

x Number u v w x

x----------------------------------------------------------x

x Se 1 0.066723 0.663418 0.125686 x

x Se 2 0.133128 0.336827 0.625296 x

x Se 3 0.133152 0.336671 0.874586 x

x Se 4 0.066659 0.663169 0.374535 x

x Se 5 0.266588 0.666333 0.126137 x

x Se 6 0.332786 0.335705 0.624877 x

x Se 7 0.332780 0.335632 0.874989 x

x Se 8 0.266525 0.666172 0.374054 x

x Se 9 0.467757 0.665763 0.125638 x

x Se 10 0.532108 0.333847 0.625401 x

x Se 11 0.532242 0.334237 0.874364 x

x Se 12 0.467891 0.666151 0.374600 x

x Se 13 0.667220 0.664370 0.125011 x

x Se 14 0.733474 0.333826 0.625947 x

x Se 15 0.733412 0.333666 0.873864 x

x Se 16 0.667214 0.664296 0.375123 x

x Se 17 0.866849 0.663326 0.125415 x

x Se 18 0.933342 0.336835 0.625465 x

x Se 19 0.933277 0.336583 0.874314 x

x Se 20 0.866873 0.663170 0.374703 x

x Nb 1 -0.000296 -0.001086 0.250110 x

x Nb 2 0.000295 0.001099 0.749890 x

x Nb 3 0.000001 -0.000005 0.000002 x

x Nb 4 0.000001 -0.000002 0.499998 x

x Nb 5 0.199580 -0.001033 0.250108 x

x Nb 6 0.200335 0.001797 0.749885 x

x Nb 7 0.200006 0.000056 0.000051 x

x Nb 8 0.200000 0.000058 0.499947 x

x Nb 9 0.399851 -0.001149 0.250118 x

x Nb 10 0.400307 0.000905 0.749885 x

x Nb 11 0.399894 0.000256 0.000025 x

x Nb 12 0.399899 0.000248 0.499975 x

x Nb 13 0.599691 -0.000916 0.250114 x

x Nb 14 0.600148 0.001148 0.749881 x

x Nb 15 0.600104 -0.000267 -0.000025 x

x Nb 16 0.600100 -0.000255 0.500023 x

x Nb 17 0.799668 -0.001789 0.250115 x

x Nb 18 0.800421 0.001025 0.749892 x

x Nb 19 0.799995 -0.000042 -0.000054 x

x Nb 20 0.800001 -0.000047 0.500055 x

xxxxxxxxxxxxxxxxxxxxxxxxxxxxxxxxxxxxxxxxxxxxxxxxxxxxxxxxxxxx

------------------------------------------------------------------------ <-- SCF

SCF loop Energy Energy gain Timer <-- SCF

per atom (sec) <-- SCF

------------------------------------------------------------------------ <-- SCF

Initial -3.62577952E+004 7413.83 <-- SCF

1 -3.62676740E+004 2.46970424E-001 7442.30 <-- SCF

2 -3.62681844E+004 1.27598965E-002 7472.42 <-- SCF

3 -3.62676887E+004 -1.23934790E-002 7499.77 <-- SCF

4 -3.62596234E+004 -2.01631775E-001 7527.25 <-- SCF

5 -3.62598046E+004 4.53077110E-003 7556.34 <-- SCF

6 -3.62597615E+004 -1.07721441E-003 7583.25 <-- SCF

7 -3.62597614E+004 -4.68706697E-006 7611.89 <-- SCF

8 -3.62597637E+004 5.94306952E-005 7636.17 <-- SCF

9 -3.62597643E+004 1.43583349E-005 7660.16 <-- SCF

10 -3.62597652E+004 2.18418276E-005 7679.70 <-- SCF

11 -3.62597658E+004 1.43607036E-005 7698.53 <-- SCF

12 -3.62597662E+004 1.11455624E-005 7717.48 <-- SCF

13 -3.62597666E+004 8.77223195E-006 7735.62 <-- SCF

14 -3.62597669E+004 7.52176927E-006 7754.27 <-- SCF

15 -3.62597671E+004 6.97432041E-006 7772.72 <-- SCF

16 -3.62597674E+004 7.17006212E-006 7791.25 <-- SCF

17 -3.62597677E+004 6.91920649E-006 7809.77 <-- SCF

18 -3.62597680E+004 7.18519419E-006 7828.44 <-- SCF

19 -3.62597683E+004 7.51262543E-006 7846.78 <-- SCF

20 -3.62597686E+004 8.03494686E-006 7864.22 <-- SCF

21 -3.62597690E+004 8.60519863E-006 7881.50 <-- SCF

22 -3.62597693E+004 8.86684403E-006 7899.27 <-- SCF

23 -3.62597697E+004 9.53099883E-006 7916.72 <-- SCF

24 -3.62597701E+004 1.09881203E-005 7934.38 <-- SCF

25 -3.62597706E+004 1.09968142E-005 7951.64 <-- SCF

26 -3.62597710E+004 1.07498913E-005 7969.22 <-- SCF

27 -3.62597715E+004 1.22643385E-005 7987.05 <-- SCF

28 -3.62597719E+004 1.14441104E-005 8004.33 <-- SCF

29 -3.62597724E+004 1.11857777E-005 8022.09 <-- SCF

30 -3.62597729E+004 1.18043811E-005 8039.88 <-- SCF

31 -3.62597733E+004 1.16880033E-005 8057.30 <-- SCF

32 -3.62597738E+004 1.17840072E-005 8074.81 <-- SCF

33 -3.62597743E+004 1.17942723E-005 8092.27 <-- SCF

34 -3.62597748E+004 1.29264463E-005 8109.91 <-- SCF

35 -3.62597753E+004 1.20054511E-005 8127.58 <-- SCF

36 -3.62597758E+004 1.20338323E-005 8145.28 <-- SCF

37 -3.62597762E+004 1.07990321E-005 8162.73 <-- SCF

38 -3.62597765E+004 9.07698943E-006 8180.45 <-- SCF

39 -3.62597769E+004 9.63209504E-006 8198.19 <-- SCF

40 -3.62597773E+004 8.27759230E-006 8215.66 <-- SCF

41 -3.62597776E+004 7.24849959E-006 8233.70 <-- SCF

42 -3.62597778E+004 6.87316433E-006 8250.98 <-- SCF

43 -3.62597782E+004 9.54651822E-006 8268.25 <-- SCF

44 -3.62597785E+004 7.23931461E-006 8285.69 <-- SCF

45 -3.62597788E+004 6.77370817E-006 8303.34 <-- SCF

46 -3.62597790E+004 4.95744152E-006 8320.72 <-- SCF

47 -3.62597792E+004 6.81700447E-006 8339.02 <-- SCF

48 -3.62597795E+004 6.34690462E-006 8356.95 <-- SCF

49 -3.62597796E+004 2.48236236E-006 8374.53 <-- SCF

50 -3.62597797E+004 3.10640074E-006 8393.14 <-- SCF

51 -3.62597797E+004 -5.13831117E-007 8411.81 <-- SCF

52 -3.62597797E+004 9.29113112E-007 8430.25 <-- SCF

------------------------------------------------------------------------ <-- SCF

Final energy = -36259.77973847 eV

(energy not corrected for finite basis set)

*********************************** Forces ***********************************

* *

* Cartesian components (eV/A) *

* -------------------------------------------------------------------------- *

* x y z *

* *

* Se 1 0.10770 0.02141 0.15189 *

* Se 2 -0.17060 -0.10294 0.11021 *

* Se 3 -0.17350 -0.08273 -0.11440 *

* Se 4 0.13798 0.03980 -0.13761 *

* Se 5 0.06489 -0.05675 0.07300 *

* Se 6 -0.12669 -0.08484 0.09966 *

* Se 7 -0.11730 -0.08865 -0.10367 *

* Se 8 0.07075 -0.05292 -0.07298 *

* Se 9 -0.14657 0.03494 0.06752 *

* Se 10 0.15547 -0.05519 0.06269 *

* Se 11 0.14662 -0.03488 -0.06732 *

* Se 12 -0.15549 0.05514 -0.06294 *

* Se 13 0.11724 0.08858 0.10292 *

* Se 14 -0.07112 0.05247 0.07295 *

* Se 15 -0.06505 0.05651 -0.07311 *

* Se 16 0.12726 0.08477 -0.09905 *

* Se 17 0.17265 0.08261 0.11484 *

* Se 18 -0.13823 -0.03958 0.13730 *

* Se 19 -0.10734 -0.02092 -0.15253 *

* Se 20 0.17011 0.10319 -0.11046 *

* Nb 1 -0.03156 -0.08843 -0.01532 *

* Nb 2 0.03078 0.08945 0.01554 *

* Nb 3 0.00012 -0.00068 0.00018 *

* Nb 4 0.00024 -0.00032 -0.00012 *

* Nb 5 -0.12693 0.00780 0.00835 *

* Nb 6 0.05708 0.09511 -0.01525 *

* Nb 7 0.00326 -0.01655 0.01616 *

* Nb 8 0.02252 -0.01402 -0.01673 *

* Nb 9 0.06691 -0.09639 0.00594 *

* Nb 10 -0.03050 0.08479 0.00792 *

* Nb 11 -0.05228 0.07633 0.03911 *

* Nb 12 -0.06858 0.06048 -0.04985 *

* Nb 13 0.02940 -0.08347 -0.00784 *

* Nb 14 -0.06594 0.09634 -0.00688 *

* Nb 15 0.05311 -0.07675 -0.03849 *

* Nb 16 0.06975 -0.06087 0.05026 *

* Nb 17 -0.05538 -0.09634 0.01525 *

* Nb 18 0.12676 -0.00894 -0.00771 *

* Nb 19 -0.00409 0.01765 -0.01632 *

* Nb 20 -0.02344 0.01478 0.01688 *

* *

******************************************************************************

***************** Stress Tensor *****************

* *

* Cartesian components (GPa) *

* --------------------------------------------- *

* x y z *

* *

* x 0.746245 0.514546 0.058840 *

* y 0.514546 0.297225 0.083432 *

* z 0.058840 0.083432 -0.628111 *

* *

* Pressure: -0.1385 *

* *

*************************************************

+------------+-------------+-------------+-----------------+ <-- min BFGS

| Step | lambda | F.delta | enthalpy | <-- min BFGS

+------------+-------------+-------------+-----------------+ <-- min BFGS

| previous | 0.000000 | 0.009842 | -36259.491081 | <-- min BFGS

| trial step | 1.000000 | 0.004898 | -36259.691370 | <-- min BFGS

| line step | 1.990689 | 0.000314 | -36259.779816 | <-- min BFGS

+------------+-------------+-------------+-----------------+ <-- min BFGS

BFGS: finished iteration 9 with enthalpy= -3.62597798E+004 eV

+-----------+-----------------+-----------------+------------+-----+ <-- BFGS

| Parameter | value | tolerance | units | OK? | <-- BFGS

+-----------+-----------------+-----------------+------------+-----+ <-- BFGS

| dE/ion | 7.218376E-003 | 5.000000E-006 | eV | No | <-- BFGS

| |F|max | 2.277032E-001 | 1.000000E-002 | eV/A | No | <-- BFGS

| |dR|max | 3.886353E-002 | 5.000000E-004 | A | No | <-- BFGS

| Smax | 7.462446E-001 | 2.000000E-002 | GPa | No | <-- BFGS

+-----------+-----------------+-----------------+------------+-----+ <-- BFGS

================================================================================

Starting BFGS iteration 10 ...

================================================================================

Writing analysis data to 2H-Nb1.1Se2-7-UF.castep_bin

Writing model to 2H-Nb1.1Se2-7-UF.check

+------------+-------------+-------------+-----------------+ <-- min BFGS

| Step | lambda | F.delta | enthalpy | <-- min BFGS

+------------+-------------+-------------+-----------------+ <-- min BFGS

| previous | 0.000000 | 0.001242 | -36259.779816 | <-- min BFGS

+------------+-------------+-------------+-----------------+ <-- min BFGS

--------------------------------------------------------------------------------

BFGS: starting iteration 10 with trial guess (lambda= 1.000000)

--------------------------------------------------------------------------------

-------------------------------

Unit Cell

-------------------------------

Real Lattice(A) Reciprocal Lattice(1/A)

14.8211188 -8.3837521 -0.0018908 0.4225402 -0.0024651 -0.0000422

0.0197631 3.3875200 0.0014966 1.0457422 1.8487033 -0.0007226

0.0014222 0.0046527 13.9616005 -0.0000549 -0.0001985 0.4500334

Lattice parameters(A) Cell Angles

a = 17.028002 alpha = 89.955560

b = 3.387578 beta = 90.010683

c = 13.961601 gamma = 119.160952

Current cell volume = 703.280954 A**3

-------------------------------

Cell Contents

-------------------------------

xxxxxxxxxxxxxxxxxxxxxxxxxxxxxxxxxxxxxxxxxxxxxxxxxxxxxxxxxxxx

x Element Atom Fractional coordinates of atoms x

x Number u v w x

x----------------------------------------------------------x

x Se 1 0.066742 0.663151 0.126357 x

x Se 2 0.133094 0.337062 0.625934 x

x Se 3 0.133120 0.336897 0.873946 x

x Se 4 0.066674 0.662889 0.373876 x

x Se 5 0.266594 0.666298 0.126848 x

x Se 6 0.332725 0.335860 0.625474 x

x Se 7 0.332720 0.335782 0.874390 x

x Se 8 0.266526 0.666125 0.373349 x

x Se 9 0.467834 0.665653 0.126298 x

x Se 10 0.532019 0.333915 0.626048 x

x Se 11 0.532165 0.334348 0.873703 x

x Se 12 0.467980 0.666083 0.373952 x

x Se 13 0.667280 0.664221 0.125609 x

x Se 14 0.733474 0.333872 0.626652 x

x Se 15 0.733406 0.333700 0.873153 x

x Se 16 0.667275 0.664141 0.374527 x

x Se 17 0.866880 0.663099 0.126055 x

x Se 18 0.933327 0.337115 0.626124 x

x Se 19 0.933258 0.336850 0.873642 x

x Se 20 0.866906 0.662936 0.374064 x

x Nb 1 -0.000328 -0.001231 0.250118 x

x Nb 2 0.000327 0.001245 0.749882 x

x Nb 3 0.000001 -0.000005 0.000002 x

x Nb 4 0.000001 -0.000003 0.499998 x

x Nb 5 0.199527 -0.001162 0.250119 x

x Nb 6 0.200374 0.002022 0.749873 x

x Nb 7 0.200006 0.000054 0.000058 x

x Nb 8 0.200001 0.000061 0.499939 x

x Nb 9 0.399840 -0.001283 0.250130 x

x Nb 10 0.400335 0.001017 0.749875 x

x Nb 11 0.399879 0.000299 0.000032 x

x Nb 12 0.399883 0.000282 0.499968 x

x Nb 13 0.599662 -0.001028 0.250123 x

x Nb 14 0.600158 0.001284 0.749869 x

x Nb 15 0.600119 -0.000310 -0.000031 x

x Nb 16 0.600116 -0.000288 0.500031 x

x Nb 17 0.799630 -0.002012 0.250127 x

x Nb 18 0.800475 0.001153 0.749881 x

x Nb 19 0.799994 -0.000040 -0.000061 x

x Nb 20 0.799999 -0.000050 0.500063 x

xxxxxxxxxxxxxxxxxxxxxxxxxxxxxxxxxxxxxxxxxxxxxxxxxxxxxxxxxxxx

------------------------------------------------------------------------ <-- SCF

SCF loop Energy Energy gain Timer <-- SCF

per atom (sec) <-- SCF

------------------------------------------------------------------------ <-- SCF

Initial -3.62592737E+004 8537.11 <-- SCF

1 -3.62618174E+004 6.35923278E-002 8567.83 <-- SCF

2 -3.62619348E+004 2.93561715E-003 8598.59 <-- SCF

3 -3.62616320E+004 -7.57037466E-003 8625.59 <-- SCF

4 -3.62597584E+004 -4.68401053E-002 8652.72 <-- SCF

5 -3.62597958E+004 9.36583662E-004 8679.94 <-- SCF

6 -3.62597853E+004 -2.63691263E-004 8707.88 <-- SCF

7 -3.62597855E+004 5.93186531E-006 8733.34 <-- SCF

8 -3.62597861E+004 1.43266809E-005 8754.19 <-- SCF

9 -3.62597862E+004 2.95831882E-006 8773.38 <-- SCF

10 -3.62597864E+004 3.62313704E-006 8791.48 <-- SCF

11 -3.62597865E+004 3.89481120E-006 8810.61 <-- SCF

12 -3.62597866E+004 2.76958855E-006 8828.78 <-- SCF

13 -3.62597867E+004 2.20750120E-006 8847.17 <-- SCF

14 -3.62597868E+004 1.79431711E-006 8864.95 <-- SCF

15 -3.62597868E+004 1.50144206E-006 8883.28 <-- SCF

16 -3.62597869E+004 1.22863503E-006 8901.91 <-- SCF

17 -3.62597869E+004 1.04362663E-006 8919.88 <-- SCF

18 -3.62597870E+004 8.47102713E-007 8937.12 <-- SCF

------------------------------------------------------------------------ <-- SCF

Final energy = -36259.78696455 eV

(energy not corrected for finite basis set)

*********************************** Forces ***********************************

* *

* Cartesian components (eV/A) *

* -------------------------------------------------------------------------- *

* x y z *

* *

* Se 1 0.06056 0.04734 0.02591 *

* Se 2 -0.13525 -0.05636 0.07413 *

* Se 3 -0.13420 -0.02541 -0.07891 *

* Se 4 0.08749 0.03823 -0.03928 *

* Se 5 0.05177 -0.08720 -0.07474 *

* Se 6 -0.13023 -0.05248 0.07061 *

* Se 7 -0.12936 -0.03006 -0.08794 *

* Se 8 0.07761 -0.08733 0.05194 *

* Se 9 -0.10668 -0.01032 0.03754 *

* Se 10 0.13851 -0.01770 0.02767 *

* Se 11 0.10687 0.01023 -0.03760 *

* Se 12 -0.13856 0.01778 -0.02768 *

* Se 13 0.12944 0.02999 0.08757 *

* Se 14 -0.07759 0.08710 -0.05190 *

* Se 15 -0.05209 0.08703 0.07450 *

* Se 16 0.13020 0.05245 -0.07043 *

* Se 17 0.13409 0.02542 0.07927 *

* Se 18 -0.08735 -0.03801 0.03937 *

* Se 19 -0.06022 -0.04714 -0.02603 *

* Se 20 0.13511 0.05632 -0.07449 *

* Nb 1 -0.06800 -0.05260 0.00066 *

* Nb 2 0.06734 0.05325 -0.00063 *

* Nb 3 -0.00011 -0.00042 0.00007 *

* Nb 4 -0.00002 -0.00046 -0.00015 *

* Nb 5 -0.11369 0.04264 0.00135 *

* Nb 6 0.05898 0.06125 0.00278 *

* Nb 7 -0.00353 0.01221 0.03148 *

* Nb 8 0.00303 0.01396 -0.02637 *

* Nb 9 0.04234 -0.03192 0.01347 *

* Nb 10 -0.04468 0.05955 0.00491 *

* Nb 11 -0.02657 0.03660 0.03577 *

* Nb 12 -0.04319 0.03686 -0.04799 *

* Nb 13 0.04459 -0.05914 -0.00466 *

* Nb 14 -0.04223 0.03242 -0.01330 *

* Nb 15 0.02669 -0.03679 -0.03554 *

* Nb 16 0.04322 -0.03699 0.04782 *

* Nb 17 -0.05874 -0.06222 -0.00268 *

* Nb 18 0.11406 -0.04321 -0.00137 *

* Nb 19 0.00354 -0.01157 -0.03171 *

* Nb 20 -0.00314 -0.01330 0.02660 *

* *

******************************************************************************

***************** Stress Tensor *****************

* *

* Cartesian components (GPa) *

* --------------------------------------------- *

* x y z *

* *

* x -0.602899 -0.148479 0.020368 *

* y -0.148479 0.176094 0.078374 *

* z 0.020368 0.078374 0.401692 *

* *

* Pressure: 0.0084 *

* *

*************************************************

+------------+-------------+-------------+-----------------+ <-- min BFGS

| Step | lambda | F.delta | enthalpy | <-- min BFGS

+------------+-------------+-------------+-----------------+ <-- min BFGS

| previous | 0.000000 | 0.001242 | -36259.779816 | <-- min BFGS

| trial step | 1.000000 | -0.000101 | -36259.787073 | <-- min BFGS

+------------+-------------+-------------+-----------------+ <-- min BFGS

BFGS: finished iteration 10 with enthalpy= -3.62597871E+004 eV

+-----------+-----------------+-----------------+------------+-----+ <-- BFGS

| Parameter | value | tolerance | units | OK? | <-- BFGS

+-----------+-----------------+-----------------+------------+-----+ <-- BFGS

| dE/ion | 1.814234E-004 | 5.000000E-006 | eV | No | <-- BFGS

| |F|max | 1.642407E-001 | 1.000000E-002 | eV/A | No | <-- BFGS

| |dR|max | 9.937857E-003 | 5.000000E-004 | A | No | <-- BFGS

| Smax | 6.028987E-001 | 2.000000E-002 | GPa | No | <-- BFGS

+-----------+-----------------+-----------------+------------+-----+ <-- BFGS

================================================================================

Starting BFGS iteration 11 ...

================================================================================

+------------+-------------+-------------+-----------------+ <-- min BFGS

| Step | lambda | F.delta | enthalpy | <-- min BFGS

+------------+-------------+-------------+-----------------+ <-- min BFGS

| previous | 0.000000 | 0.000175 | -36259.787073 | <-- min BFGS

+------------+-------------+-------------+-----------------+ <-- min BFGS

--------------------------------------------------------------------------------

BFGS: starting iteration 11 with trial guess (lambda= 1.000000)

--------------------------------------------------------------------------------

-------------------------------

Unit Cell

-------------------------------

Real Lattice(A) Reciprocal Lattice(1/A)

14.8271831 -8.3847622 -0.0017176 0.4223360 -0.0025203 -0.0000377

0.0202223 3.3887174 0.0013491 1.0449934 1.8479128 -0.0006474

0.0012701 0.0041698 13.9514146 -0.0000491 -0.0001790 0.4503619

Lattice parameters(A) Cell Angles

a = 17.033778 alpha = 89.960034

b = 3.388778 beta = 90.009666

c = 13.951415 gamma = 119.146220

Current cell volume = 703.356174 A**3

-------------------------------

Cell Contents

-------------------------------

xxxxxxxxxxxxxxxxxxxxxxxxxxxxxxxxxxxxxxxxxxxxxxxxxxxxxxxxxxxx

x Element Atom Fractional coordinates of atoms x

x Number u v w x

x----------------------------------------------------------x

x Se 1 0.066752 0.663038 0.126594 x

x Se 2 0.133075 0.337148 0.626169 x

x Se 3 0.133101 0.336987 0.873720 x

x Se 4 0.066684 0.662768 0.373634 x

x Se 5 0.266600 0.666262 0.127096 x

x Se 6 0.332692 0.335911 0.625688 x

x Se 7 0.332687 0.335836 0.874182 x

x Se 8 0.266530 0.666087 0.373094 x

x Se 9 0.467860 0.665576 0.126532 x

x Se 10 0.531989 0.333969 0.626284 x

x Se 11 0.532139 0.334425 0.873470 x

x Se 12 0.468010 0.666030 0.373717 x

x Se 13 0.667313 0.664167 0.125817 x

x Se 14 0.733469 0.333910 0.626907 x

x Se 15 0.733400 0.333736 0.872905 x

x Se 16 0.667308 0.664091 0.374313 x

x Se 17 0.866899 0.663009 0.126281 x

x Se 18 0.933317 0.337237 0.626366 x

x Se 19 0.933248 0.336963 0.873405 x

x Se 20 0.866926 0.662850 0.373829 x

x Nb 1 -0.000347 -0.001315 0.250122 x

x Nb 2 0.000346 0.001330 0.749878 x

x Nb 3 0.000001 -0.000006 0.000002 x

x Nb 4 0.000001 -0.000003 0.499998 x

x Nb 5 0.199497 -0.001223 0.250123 x

x Nb 6 0.200395 0.002141 0.749868 x

x Nb 7 0.200007 0.000057 0.000064 x

x Nb 8 0.200002 0.000066 0.499934 x

x Nb 9 0.399837 -0.001343 0.250136 x

x Nb 10 0.400346 0.001070 0.749871 x

x Nb 11 0.399872 0.000322 0.000036 x

x Nb 12 0.399874 0.000300 0.499962 x

x Nb 13 0.599651 -0.001082 0.250127 x

x Nb 14 0.600162 0.001343 0.749863 x

x Nb 15 0.600126 -0.000334 -0.000036 x

x Nb 16 0.600125 -0.000307 0.500037 x

x Nb 17 0.799610 -0.002131 0.250132 x

x Nb 18 0.800505 0.001212 0.749877 x

x Nb 19 0.799994 -0.000041 -0.000067 x

x Nb 20 0.799998 -0.000055 0.500069 x

xxxxxxxxxxxxxxxxxxxxxxxxxxxxxxxxxxxxxxxxxxxxxxxxxxxxxxxxxxxx

------------------------------------------------------------------------ <-- SCF

SCF loop Energy Energy gain Timer <-- SCF

per atom (sec) <-- SCF

------------------------------------------------------------------------ <-- SCF

Initial -3.62597309E+004 9040.28 <-- SCF

1 -3.62600611E+004 8.25502649E-003 9067.50 <-- SCF

2 -3.62600770E+004 3.99368092E-004 9096.55 <-- SCF

3 -3.62600310E+004 -1.14999972E-003 9123.89 <-- SCF

4 -3.62597859E+004 -6.12787481E-003 9150.47 <-- SCF

5 -3.62597913E+004 1.35338348E-004 9177.91 <-- SCF

6 -3.62597906E+004 -1.68792995E-005 9202.27 <-- SCF

7 -3.62597905E+004 -4.01845232E-006 9224.45 <-- SCF

8 -3.62597906E+004 1.92177725E-006 9243.83 <-- SCF

9 -3.62597906E+004 8.66082113E-007 9262.39 <-- SCF

10 -3.62597906E+004 4.36834632E-007 9280.33 <-- SCF

------------------------------------------------------------------------ <-- SCF

Final energy = -36259.79061780 eV

(energy not corrected for finite basis set)

*********************************** Forces ***********************************

* *

* Cartesian components (eV/A) *

* -------------------------------------------------------------------------- *

* x y z *

* *

* Se 1 0.04030 0.05935 0.00022 *

* Se 2 -0.13243 -0.01978 0.05859 *

* Se 3 -0.12959 0.00786 -0.06040 *

* Se 4 0.07197 0.05683 0.00928 *

* Se 5 0.03603 -0.08458 -0.11350 *

* Se 6 -0.13503 -0.02843 0.07078 *

* Se 7 -0.12840 -0.00665 -0.08928 *

* Se 8 0.06983 -0.08400 0.10827 *

* Se 9 -0.07680 -0.02699 0.02123 *

* Se 10 0.11266 -0.00271 0.02133 *

* Se 11 0.07703 0.02686 -0.02136 *

* Se 12 -0.11267 0.00277 -0.02132 *

* Se 13 0.12852 0.00658 0.08892 *

* Se 14 -0.06977 0.08379 -0.10828 *

* Se 15 -0.03636 0.08444 0.11337 *

* Se 16 0.13503 0.02841 -0.07061 *

* Se 17 0.12944 -0.00787 0.06070 *

* Se 18 -0.07184 -0.05661 -0.00921 *

* Se 19 -0.03996 -0.05914 -0.00036 *

* Se 20 0.13226 0.01974 -0.05887 *

* Nb 1 -0.06658 -0.05240 -0.00258 *

* Nb 2 0.06598 0.05293 0.00258 *

* Nb 3 -0.00013 -0.00035 0.00006 *

* Nb 4 -0.00003 -0.00039 -0.00013 *

* Nb 5 -0.10795 0.04177 0.00089 *

* Nb 6 0.05780 0.06229 0.00321 *

* Nb 7 -0.00330 0.01369 0.03156 *

* Nb 8 0.00199 0.01626 -0.02655 *

* Nb 9 0.04531 -0.03076 0.01148 *

* Nb 10 -0.05336 0.06288 0.00744 *

* Nb 11 -0.02375 0.03450 0.03382 *

* Nb 12 -0.03880 0.03339 -0.04543 *

* Nb 13 0.05315 -0.06254 -0.00715 *

* Nb 14 -0.04515 0.03126 -0.01132 *

* Nb 15 0.02385 -0.03466 -0.03361 *

* Nb 16 0.03889 -0.03359 0.04528 *

* Nb 17 -0.05757 -0.06313 -0.00311 *

* Nb 18 0.10822 -0.04221 -0.00090 *

* Nb 19 0.00332 -0.01314 -0.03181 *

* Nb 20 -0.00211 -0.01569 0.02677 *

* *

******************************************************************************

***************** Stress Tensor *****************

* *

* Cartesian components (GPa) *

* --------------------------------------------- *

* x y z *

* *

* x -0.559840 -0.143786 0.017334 *

* y -0.143786 0.236399 0.066865 *

* z 0.017334 0.066865 0.263827 *

* *

* Pressure: 0.0199 *

* *

*************************************************

+------------+-------------+-------------+-----------------+ <-- min BFGS

| Step | lambda | F.delta | enthalpy | <-- min BFGS

+------------+-------------+-------------+-----------------+ <-- min BFGS

| previous | 0.000000 | 0.000175 | -36259.787073 | <-- min BFGS

| trial step | 1.000000 | 0.000100 | -36259.790758 | <-- min BFGS

+------------+-------------+-------------+-----------------+ <-- min BFGS

--------------------------------------------------------------------------------

BFGS: improving iteration 11 with line minimization (lambda= 2.333841)

--------------------------------------------------------------------------------

-------------------------------

Unit Cell

-------------------------------

Real Lattice(A) Reciprocal Lattice(1/A)

14.8352719 -8.3861096 -0.0014865 0.4220640 -0.0025937 -0.0000317

0.0208348 3.3903145 0.0011525 1.0439961 1.8468595 -0.0005471

0.0010674 0.0035257 13.9378283 -0.0000413 -0.0001530 0.4508009

Lattice parameters(A) Cell Angles

a = 17.041483 alpha = 89.966004

b = 3.390379 beta = 90.008310

c = 13.937829 gamma = 119.126587

Current cell volume = 703.455500 A**3

-------------------------------

Cell Contents

-------------------------------

xxxxxxxxxxxxxxxxxxxxxxxxxxxxxxxxxxxxxxxxxxxxxxxxxxxxxxxxxxxx

x Element Atom Fractional coordinates of atoms x

x Number u v w x

x----------------------------------------------------------x

x Se 1 0.066766 0.662887 0.126910 x

x Se 2 0.133048 0.337262 0.626483 x

x Se 3 0.133076 0.337107 0.873418 x

x Se 4 0.066697 0.662606 0.373312 x

x Se 5 0.266607 0.666214 0.127427 x

x Se 6 0.332649 0.335979 0.625973 x

x Se 7 0.332643 0.335908 0.873905 x

x Se 8 0.266537 0.666035 0.372753 x

x Se 9 0.467895 0.665473 0.126844 x

x Se 10 0.531949 0.334040 0.626598 x

x Se 11 0.532104 0.334528 0.873157 x

x Se 12 0.468049 0.665958 0.373403 x

x Se 13 0.667357 0.664095 0.126095 x

x Se 14 0.733463 0.333962 0.627247 x

x Se 15 0.733393 0.333783 0.872574 x

x Se 16 0.667352 0.664024 0.374027 x

x Se 17 0.866924 0.662889 0.126584 x

x Se 18 0.933304 0.337399 0.626688 x

x Se 19 0.933234 0.337115 0.873089 x

x Se 20 0.866952 0.662735 0.373516 x

x Nb 1 -0.000373 -0.001428 0.250127 x

x Nb 2 0.000372 0.001443 0.749873 x

x Nb 3 0.000001 -0.000006 0.000003 x

x Nb 4 0.000001 -0.000003 0.499998 x

x Nb 5 0.199457 -0.001303 0.250129 x

x Nb 6 0.200422 0.002301 0.749862 x

x Nb 7 0.200007 0.000060 0.000072 x

x Nb 8 0.200003 0.000073 0.499927 x

x Nb 9 0.399832 -0.001422 0.250144 x

x Nb 10 0.400361 0.001142 0.749866 x

x Nb 11 0.399861 0.000354 0.000043 x

x Nb 12 0.399863 0.000325 0.499954 x

x Nb 13 0.599636 -0.001154 0.250132 x

x Nb 14 0.600167 0.001423 0.749855 x

x Nb 15 0.600136 -0.000366 -0.000042 x

x Nb 16 0.600136 -0.000332 0.500045 x

x Nb 17 0.799582 -0.002291 0.250138 x

x Nb 18 0.800545 0.001292 0.749871 x

x Nb 19 0.799994 -0.000043 -0.000075 x

x Nb 20 0.799997 -0.000061 0.500076 x

xxxxxxxxxxxxxxxxxxxxxxxxxxxxxxxxxxxxxxxxxxxxxxxxxxxxxxxxxxxx

------------------------------------------------------------------------ <-- SCF

SCF loop Energy Energy gain Timer <-- SCF

per atom (sec) <-- SCF

------------------------------------------------------------------------ <-- SCF

Initial -3.62596843E+004 9380.28 <-- SCF

1 -3.62602972E+004 1.53205310E-002 9406.75 <-- SCF

2 -3.62603305E+004 8.34062725E-004 9435.06 <-- SCF

3 -3.62602455E+004 -2.12500527E-003 9460.67 <-- SCF

4 -3.62597838E+004 -1.15433035E-002 9485.97 <-- SCF

5 -3.62597943E+004 2.62412195E-004 9511.59 <-- SCF

6 -3.62597926E+004 -4.18693838E-005 9535.55 <-- SCF

7 -3.62597923E+004 -8.25468297E-006 9558.11 <-- SCF

8 -3.62597925E+004 4.28128906E-006 9577.45 <-- SCF

9 -3.62597925E+004 1.01029428E-006 9595.16 <-- SCF

10 -3.62597925E+004 9.04527997E-007 9612.34 <-- SCF

------------------------------------------------------------------------ <-- SCF

Final energy = -36259.79253149 eV

(energy not corrected for finite basis set)

*********************************** Forces ***********************************

* *

* Cartesian components (eV/A) *

* -------------------------------------------------------------------------- *

* x y z *

* *

* Se 1 0.00472 0.05736 -0.01438 *

* Se 2 -0.12210 0.03129 0.03051 *

* Se 3 -0.11642 0.05441 -0.03662 *

* Se 4 0.04046 0.06883 0.03173 *

* Se 5 0.00836 -0.08252 -0.15512 *

* Se 6 -0.12540 0.00154 0.06684 *

* Se 7 -0.11229 0.02006 -0.08208 *

* Se 8 0.04504 -0.08058 0.15316 *

* Se 9 -0.04791 -0.05808 0.00250 *

* Se 10 0.07856 0.01833 -0.00044 *

* Se 11 0.04805 0.05788 -0.00261 *

* Se 12 -0.07852 -0.01827 0.00041 *

* Se 13 0.11248 -0.02014 0.08173 *

* Se 14 -0.04496 0.08038 -0.15319 *

* Se 15 -0.00868 0.08239 0.15498 *

* Se 16 0.12548 -0.00158 -0.06672 *

* Se 17 0.11618 -0.05444 0.03697 *

* Se 18 -0.04029 -0.06861 -0.03162 *

* Se 19 -0.00434 -0.05713 0.01422 *

* Se 20 0.12186 -0.03134 -0.03078 *

* Nb 1 -0.06155 -0.05339 -0.00584 *

* Nb 2 0.06097 0.05388 0.00583 *

* Nb 3 -0.00015 -0.00032 0.00008 *

* Nb 4 -0.00002 -0.00035 -0.00014 *

* Nb 5 -0.10273 0.04146 -0.00078 *

* Nb 6 0.05447 0.06307 0.00495 *

* Nb 7 -0.00316 0.01468 0.03147 *

* Nb 8 0.00071 0.01764 -0.02669 *

* Nb 9 0.05022 -0.02964 0.00934 *

* Nb 10 -0.06606 0.06620 0.00986 *

* Nb 11 -0.02139 0.03231 0.03254 *

* Nb 12 -0.03557 0.03080 -0.04374 *

* Nb 13 0.06571 -0.06590 -0.00954 *

* Nb 14 -0.04997 0.03020 -0.00917 *

* Nb 15 0.02146 -0.03245 -0.03231 *

* Nb 16 0.03564 -0.03098 0.04356 *

* Nb 17 -0.05420 -0.06386 -0.00485 *

* Nb 18 0.10295 -0.04187 0.00080 *

* Nb 19 0.00321 -0.01416 -0.03177 *

* Nb 20 -0.00083 -0.01712 0.02693 *

* *

******************************************************************************

***************** Stress Tensor *****************

* *

* Cartesian components (GPa) *

* --------------------------------------------- *

* x y z *

* *

* x -0.522599 -0.129751 0.012156 *

* y -0.129751 0.295060 0.052278 *

* z 0.012156 0.052278 0.058182 *

* *

* Pressure: 0.0565 *

* *

*************************************************

+------------+-------------+-------------+-----------------+ <-- min BFGS

| Step | lambda | F.delta | enthalpy | <-- min BFGS

+------------+-------------+-------------+-----------------+ <-- min BFGS

| previous | 0.000000 | 0.000175 | -36259.787073 | <-- min BFGS

| trial step | 1.000000 | 0.000100 | -36259.790758 | <-- min BFGS

| line step | 2.333841 | 0.000018 | -36259.792677 | <-- min BFGS

+------------+-------------+-------------+-----------------+ <-- min BFGS

BFGS: finished iteration 11 with enthalpy= -3.62597927E+004 eV

+-----------+-----------------+-----------------+------------+-----+ <-- BFGS

| Parameter | value | tolerance | units | OK? | <-- BFGS

+-----------+-----------------+-----------------+------------+-----+ <-- BFGS

| dE/ion | 1.401002E-004 | 5.000000E-006 | eV | No | <-- BFGS

| |F|max | 1.788308E-001 | 1.000000E-002 | eV/A | No | <-- BFGS

| |dR|max | 8.311731E-003 | 5.000000E-004 | A | No | <-- BFGS

| Smax | 5.225993E-001 | 2.000000E-002 | GPa | No | <-- BFGS

+-----------+-----------------+-----------------+------------+-----+ <-- BFGS

================================================================================

Starting BFGS iteration 12 ...

================================================================================

+------------+-------------+-------------+-----------------+ <-- min BFGS

| Step | lambda | F.delta | enthalpy | <-- min BFGS

+------------+-------------+-------------+-----------------+ <-- min BFGS

| previous | 0.000000 | 0.000106 | -36259.792677 | <-- min BFGS

+------------+-------------+-------------+-----------------+ <-- min BFGS

--------------------------------------------------------------------------------

BFGS: starting iteration 12 with trial guess (lambda= 1.000000)

--------------------------------------------------------------------------------

-------------------------------

Unit Cell

-------------------------------

Real Lattice(A) Reciprocal Lattice(1/A)

14.8458664 -8.3841485 -0.0011263 0.4217359 -0.0026419 -0.0000244

0.0212377 3.3902487 0.0008820 1.0429609 1.8467777 -0.0004129

0.0008215 0.0026508 13.9311836 -0.0000319 -0.0001171 0.4510159

Lattice parameters(A) Cell Angles

a = 17.049742 alpha = 89.974172

b = 3.390315 beta = 90.006204

c = 13.931184 gamma = 119.096514

Current cell volume = 703.653444 A**3

-------------------------------

Cell Contents

-------------------------------

xxxxxxxxxxxxxxxxxxxxxxxxxxxxxxxxxxxxxxxxxxxxxxxxxxxxxxxxxxxx

x Element Atom Fractional coordinates of atoms x

x Number u v w x

x----------------------------------------------------------x

x Se 1 0.066770 0.662909 0.126923 x

x Se 2 0.133030 0.337231 0.626503 x

x Se 3 0.133059 0.337091 0.873399 x

x Se 4 0.066705 0.662642 0.373299 x

x Se 5 0.266610 0.666173 0.127420 x

x Se 6 0.332629 0.335935 0.625996 x

x Se 7 0.332625 0.335878 0.873883 x

x Se 8 0.266544 0.666004 0.372757 x

x Se 9 0.467888 0.665419 0.126858 x

x Se 10 0.531959 0.334081 0.626613 x

x Se 11 0.532111 0.334581 0.873144 x

x Se 12 0.468039 0.665917 0.373388 x

x Se 13 0.667375 0.664125 0.126117 x

x Se 14 0.733455 0.333993 0.627244 x

x Se 15 0.733389 0.333825 0.872581 x

x Se 16 0.667371 0.664067 0.374005 x

x Se 17 0.866941 0.662904 0.126603 x

x Se 18 0.933296 0.337363 0.626701 x

x Se 19 0.933230 0.337093 0.873077 x

x Se 20 0.866970 0.662766 0.373495 x

x Nb 1 -0.000383 -0.001486 0.250127 x

x Nb 2 0.000381 0.001501 0.749873 x

x Nb 3 0.000001 -0.000007 0.000003 x

x Nb 4 0.000001 -0.000004 0.499998 x

x Nb 5 0.199440 -0.001322 0.250130 x

x Nb 6 0.200432 0.002366 0.749862 x

x Nb 7 0.200007 0.000066 0.000078 x

x Nb 8 0.200003 0.000083 0.499922 x

x Nb 9 0.399838 -0.001431 0.250146 x

x Nb 10 0.400355 0.001164 0.749867 x

x Nb 11 0.399858 0.000368 0.000049 x

x Nb 12 0.399857 0.000333 0.499946 x

x Nb 13 0.599642 -0.001177 0.250131 x

x Nb 14 0.600161 0.001432 0.749852 x

x Nb 15 0.600140 -0.000381 -0.000048 x

x Nb 16 0.600142 -0.000340 0.500053 x

x Nb 17 0.799573 -0.002356 0.250138 x

x Nb 18 0.800562 0.001311 0.749871 x

x Nb 19 0.799994 -0.000049 -0.000081 x

x Nb 20 0.799997 -0.000070 0.500081 x

xxxxxxxxxxxxxxxxxxxxxxxxxxxxxxxxxxxxxxxxxxxxxxxxxxxxxxxxxxxx

------------------------------------------------------------------------ <-- SCF

SCF loop Energy Energy gain Timer <-- SCF

per atom (sec) <-- SCF

------------------------------------------------------------------------ <-- SCF

Initial -3.62597857E+004 9711.91 <-- SCF

1 -3.62598037E+004 4.48577369E-004 9738.80 <-- SCF

2 -3.62598046E+004 2.39047079E-005 9764.27 <-- SCF

3 -3.62598035E+004 -2.83475614E-005 9791.23 <-- SCF

4 -3.62597948E+004 -2.16819449E-004 9817.42 <-- SCF

5 -3.62597954E+004 1.43919161E-005 9839.75 <-- SCF

6 -3.62597953E+004 -2.94524181E-006 9857.98 <-- SCF

7 -3.62597952E+004 -1.00111718E-006 9876.78 <-- SCF

8 -3.62597953E+004 2.87876766E-007 9893.77 <-- SCF

------------------------------------------------------------------------ <-- SCF

Final energy = -36259.79525803 eV

(energy not corrected for finite basis set)

*********************************** Forces ***********************************

* *

* Cartesian components (eV/A) *

* -------------------------------------------------------------------------- *

* x y z *

* *

* Se 1 0.00954 0.05545 -0.01689 *

* Se 2 -0.12957 0.03425 0.02593 *

* Se 3 -0.12457 0.05644 -0.03293 *

* Se 4 0.04367 0.06747 0.03494 *

* Se 5 0.00978 -0.08141 -0.15576 *

* Se 6 -0.13018 0.00742 0.06604 *

* Se 7 -0.11724 0.02440 -0.08100 *

* Se 8 0.04509 -0.08026 0.15424 *

* Se 9 -0.04217 -0.06027 0.00361 *

* Se 10 0.07104 0.02071 -0.00246 *

* Se 11 0.04228 0.06008 -0.00366 *

* Se 12 -0.07101 -0.02063 0.00239 *

* Se 13 0.11747 -0.02448 0.08057 *

* Se 14 -0.04500 0.08008 -0.15427 *

* Se 15 -0.01009 0.08128 0.15563 *

* Se 16 0.13031 -0.00748 -0.06586 *

* Se 17 0.12427 -0.05647 0.03337 *

* Se 18 -0.04347 -0.06728 -0.03477 *

* Se 19 -0.00915 -0.05522 0.01666 *

* Se 20 0.12927 -0.03428 -0.02627 *

* Nb 1 -0.05913 -0.05323 -0.00627 *

* Nb 2 0.05843 0.05388 0.00624 *

* Nb 3 -0.00020 -0.00035 0.00018 *

* Nb 4 -0.00005 -0.00037 -0.00023 *

* Nb 5 -0.11117 0.04180 -0.00063 *

* Nb 6 0.05267 0.06155 0.00413 *

* Nb 7 -0.01045 0.01694 0.03243 *

* Nb 8 -0.00506 0.01968 -0.02705 *

* Nb 9 0.04316 -0.02844 0.00936 *

* Nb 10 -0.06339 0.06638 0.00993 *

* Nb 11 -0.02569 0.02981 0.03199 *

* Nb 12 -0.03971 0.02770 -0.04342 *

* Nb 13 0.06291 -0.06611 -0.00961 *

* Nb 14 -0.04281 0.02912 -0.00923 *

* Nb 15 0.02575 -0.02996 -0.03170 *

* Nb 16 0.03979 -0.02789 0.04320 *

* Nb 17 -0.05226 -0.06243 -0.00402 *

* Nb 18 0.11141 -0.04237 0.00066 *

* Nb 19 0.01057 -0.01637 -0.03288 *

* Nb 20 0.00498 -0.01912 0.02741 *

* *

******************************************************************************

***************** Stress Tensor *****************

* *

* Cartesian components (GPa) *

* --------------------------------------------- *

* x y z *

* *

* x -0.404636 -0.105635 0.008982 *

* y -0.105635 0.280680 0.034566 *

* z 0.008982 0.034566 -0.000457 *

* *

* Pressure: 0.0415 *

* *

*************************************************

+------------+-------------+-------------+-----------------+ <-- min BFGS

| Step | lambda | F.delta | enthalpy | <-- min BFGS

+------------+-------------+-------------+-----------------+ <-- min BFGS

| previous | 0.000000 | 0.000106 | -36259.792677 | <-- min BFGS

| trial step | 1.000000 | 0.000085 | -36259.795380 | <-- min BFGS

+------------+-------------+-------------+-----------------+ <-- min BFGS

--------------------------------------------------------------------------------

BFGS: improving iteration 12 with line minimization (lambda= 5.154105)

--------------------------------------------------------------------------------

-------------------------------

Unit Cell

-------------------------------

Real Lattice(A) Reciprocal Lattice(1/A)

14.8898774 -8.3760020 0.0003697 0.4203787 -0.0028412 0.0000058

0.0229115 3.3899754 -0.0002415 1.0386780 1.8464404 0.0001456

-0.0001996 -0.0009840 13.9035806 0.0000069 0.0000321 0.4519113

Lattice parameters(A) Cell Angles

a = 17.084082 alpha = 90.008142

b = 3.390053 beta = 89.997489

c = 13.903581 gamma = 118.971823

Current cell volume = 704.469752 A**3

-------------------------------

Cell Contents

-------------------------------

xxxxxxxxxxxxxxxxxxxxxxxxxxxxxxxxxxxxxxxxxxxxxxxxxxxxxxxxxxxx

x Element Atom Fractional coordinates of atoms x

x Number u v w x

x----------------------------------------------------------x

x Se 1 0.066788 0.663002 0.126975 x

x Se 2 0.132956 0.337102 0.626589 x

x Se 3 0.132988 0.337026 0.873320 x

x Se 4 0.066739 0.662789 0.373243 x

x Se 5 0.266624 0.665999 0.127390 x

x Se 6 0.332550 0.335754 0.626087 x

x Se 7 0.332551 0.335752 0.873791 x

x Se 8 0.266574 0.665874 0.372771 x

x Se 9 0.467860 0.665196 0.126915 x

x Se 10 0.532001 0.334251 0.626674 x

x Se 11 0.532140 0.334804 0.873087 x

x Se 12 0.467997 0.665747 0.373327 x

x Se 13 0.667449 0.664251 0.126208 x

x Se 14 0.733425 0.334122 0.627229 x

x Se 15 0.733375 0.333998 0.872611 x

x Se 16 0.667450 0.664248 0.373914 x

x Se 17 0.867012 0.662969 0.126681 x

x Se 18 0.933262 0.337217 0.626757 x

x Se 19 0.933213 0.337001 0.873024 x

x Se 20 0.867044 0.662894 0.373409 x

x Nb 1 -0.000424 -0.001727 0.250125 x

x Nb 2 0.000422 0.001744 0.749875 x

x Nb 3 0.000001 -0.000008 0.000003 x

x Nb 4 0.000001 -0.000005 0.499998 x

x Nb 5 0.199371 -0.001401 0.250131 x

x Nb 6 0.200470 0.002636 0.749863 x

x Nb 7 0.200005 0.000089 0.000102 x

x Nb 8 0.200005 0.000120 0.499901 x

x Nb 9 0.399861 -0.001469 0.250155 x

x Nb 10 0.400330 0.001257 0.749872 x

x Nb 11 0.399842 0.000428 0.000074 x

x Nb 12 0.399832 0.000367 0.499912 x

x Nb 13 0.599667 -0.001269 0.250127 x

x Nb 14 0.600138 0.001472 0.749843 x

x Nb 15 0.600156 -0.000442 -0.000073 x

x Nb 16 0.600167 -0.000375 0.500087 x

x Nb 17 0.799535 -0.002627 0.250137 x

x Nb 18 0.800632 0.001389 0.749869 x

x Nb 19 0.799995 -0.000070 -0.000105 x

x Nb 20 0.799995 -0.000106 0.500102 x

xxxxxxxxxxxxxxxxxxxxxxxxxxxxxxxxxxxxxxxxxxxxxxxxxxxxxxxxxxxx

------------------------------------------------------------------------ <-- SCF

SCF loop Energy Energy gain Timer <-- SCF

per atom (sec) <-- SCF

------------------------------------------------------------------------ <-- SCF

Initial -3.62596463E+004 9993.89 <-- SCF

1 -3.62598390E+004 4.81787244E-003 10018.91 <-- SCF

2 -3.62598496E+004 2.63418193E-004 10047.48 <-- SCF

3 -3.62598184E+004 -7.80032549E-004 10073.56 <-- SCF

4 -3.62598016E+004 -4.19264091E-004 10099.05 <-- SCF

5 -3.62598001E+004 -3.68288205E-005 10124.44 <-- SCF

6 -3.62597999E+004 -5.00052436E-006 10145.28 <-- SCF

7 -3.62598000E+004 1.01635475E-006 10163.86 <-- SCF

8 -3.62598000E+004 9.84142730E-007 10180.98 <-- SCF

9 -3.62598000E+004 6.84797458E-007 10198.81 <-- SCF

------------------------------------------------------------------------ <-- SCF

Final energy = -36259.80004188 eV

(energy not corrected for finite basis set)

*********************************** Forces ***********************************

* *

* Cartesian components (eV/A) *

* -------------------------------------------------------------------------- *

* x y z *

* *

* Se 1 0.03474 0.04517 -0.02770 *

* Se 2 -0.15044 0.05169 0.00785 *

* Se 3 -0.14775 0.07156 -0.01831 *

* Se 4 0.06510 0.05881 0.04707 *

* Se 5 0.02399 -0.07682 -0.16355 *

* Se 6 -0.13560 0.02956 0.06379 *

* Se 7 -0.12190 0.04176 -0.07573 *

* Se 8 0.05338 -0.07785 0.16232 *

* Se 9 -0.01791 -0.07691 0.00034 *

* Se 10 0.03911 0.03793 -0.01564 *

* Se 11 0.01787 0.07676 -0.00021 *

* Se 12 -0.03919 -0.03783 0.01549 *

* Se 13 0.12230 -0.04183 0.07515 *

* Se 14 -0.05324 0.07769 -0.16233 *

* Se 15 -0.02417 0.07671 0.16343 *

* Se 16 0.13588 -0.02964 -0.06350 *

* Se 17 0.14729 -0.07165 0.01898 *

* Se 18 -0.06487 -0.05866 -0.04681 *

* Se 19 -0.03435 -0.04496 0.02734 *

* Se 20 0.14997 -0.05175 -0.00836 *

* Nb 1 -0.05504 -0.03833 -0.00794 *

* Nb 2 0.05419 0.03939 0.00787 *

* Nb 3 -0.00028 -0.00040 0.00037 *

* Nb 4 -0.00010 -0.00041 -0.00040 *

* Nb 5 -0.11481 0.04133 -0.00238 *

* Nb 6 0.06622 0.04781 0.00347 *

* Nb 7 -0.00841 0.01677 0.02610 *

* Nb 8 -0.00222 0.01908 -0.01980 *

* Nb 9 0.01835 -0.02111 0.00573 *

* Nb 10 -0.03629 0.05432 0.01139 *

* Nb 11 -0.02104 0.02446 0.02097 *

* Nb 12 -0.03678 0.02178 -0.03178 *

* Nb 13 0.03555 -0.05414 -0.01111 *

* Nb 14 -0.01785 0.02208 -0.00566 *

* Nb 15 0.02101 -0.02466 -0.02055 *

* Nb 16 0.03682 -0.02199 0.03147 *

* Nb 17 -0.06562 -0.04887 -0.00336 *

* Nb 18 0.11512 -0.04233 0.00244 *

* Nb 19 0.00872 -0.01609 -0.02687 *

* Nb 20 0.00224 -0.01844 0.02043 *

* *

******************************************************************************

***************** Stress Tensor *****************

* *

* Cartesian components (GPa) *

* --------------------------------------------- *

* x y z *

* *

* x 0.135597 -0.046396 -0.006121 *

* y -0.046396 0.263380 -0.042805 *

* z -0.006121 -0.042805 -0.217149 *

* *

* Pressure: -0.0606 *

* *

*************************************************

+------------+-------------+-------------+-----------------+ <-- min BFGS

| Step | lambda | F.delta | enthalpy | <-- min BFGS

+------------+-------------+-------------+-----------------+ <-- min BFGS

| previous | 0.000000 | 0.000106 | -36259.792677 | <-- min BFGS

| trial step | 1.000000 | 0.000085 | -36259.795380 | <-- min BFGS

| line step | 5.154105 | -4.457E-006 | -36259.800087 | <-- min BFGS

+------------+-------------+-------------+-----------------+ <-- min BFGS

BFGS: finished iteration 12 with enthalpy= -3.62598001E+004 eV

+-----------+-----------------+-----------------+------------+-----+ <-- BFGS

| Parameter | value | tolerance | units | OK? | <-- BFGS

+-----------+-----------------+-----------------+------------+-----+ <-- BFGS

| dE/ion | 1.852612E-004 | 5.000000E-006 | eV | No | <-- BFGS

| |F|max | 1.877734E-001 | 1.000000E-002 | eV/A | No | <-- BFGS

| |dR|max | 2.159465E-003 | 5.000000E-004 | A | No | <-- BFGS

| Smax | 2.633801E-001 | 2.000000E-002 | GPa | No | <-- BFGS

+-----------+-----------------+-----------------+------------+-----+ <-- BFGS

================================================================================

Starting BFGS iteration 13 ...

================================================================================

+------------+-------------+-------------+-----------------+ <-- min BFGS

| Step | lambda | F.delta | enthalpy | <-- min BFGS

+------------+-------------+-------------+-----------------+ <-- min BFGS

| previous | 0.000000 | 0.000142 | -36259.800087 | <-- min BFGS

+------------+-------------+-------------+-----------------+ <-- min BFGS

--------------------------------------------------------------------------------

BFGS: starting iteration 13 with trial guess (lambda= 1.000000)

--------------------------------------------------------------------------------

-------------------------------

Unit Cell

-------------------------------

Real Lattice(A) Reciprocal Lattice(1/A)

14.8911132 -8.3675782 0.0004479 0.4203338 -0.0028619 0.0000093

0.0230600 3.3868899 -0.0003331 1.0384677 1.8480784 0.0001927

-0.0003152 -0.0012733 13.9109733 0.0000113 0.0000443 0.4516712

Lattice parameters(A) Cell Angles

a = 17.081031 alpha = 90.010888

b = 3.386968 beta = 89.997060

c = 13.910973 gamma = 118.942298

Current cell volume = 704.278046 A**3

-------------------------------

Cell Contents

-------------------------------

xxxxxxxxxxxxxxxxxxxxxxxxxxxxxxxxxxxxxxxxxxxxxxxxxxxxxxxxxxxx

x Element Atom Fractional coordinates of atoms x

x Number u v w x

x----------------------------------------------------------x

x Se 1 0.066787 0.663179 0.126747 x

x Se 2 0.132944 0.336942 0.626375 x

x Se 3 0.132976 0.336888 0.873525 x

x Se 4 0.066746 0.662996 0.373477 x

x Se 5 0.266626 0.665974 0.127115 x

x Se 6 0.332553 0.335620 0.625901 x

x Se 7 0.332556 0.335636 0.873967 x

x Se 8 0.266583 0.665868 0.373050 x

x Se 9 0.467821 0.665194 0.126694 x

x Se 10 0.532050 0.334259 0.626448 x

x Se 11 0.532179 0.334806 0.873308 x

x Se 12 0.467949 0.665740 0.373552 x

x Se 13 0.667445 0.664367 0.126032 x

x Se 14 0.733416 0.334128 0.626951 x

x Se 15 0.733374 0.334023 0.872886 x

x Se 16 0.667447 0.664382 0.374100 x

x Se 17 0.867024 0.663107 0.126477 x

x Se 18 0.933255 0.337010 0.626523 x

x Se 19 0.933214 0.336824 0.873252 x

x Se 20 0.867056 0.663054 0.373623 x

x Nb 1 -0.000419 -0.001727 0.250120 x

x Nb 2 0.000417 0.001743 0.749880 x

x Nb 3 0.000001 -0.000008 0.000003 x

x Nb 4 0.000001 -0.000005 0.499998 x

x Nb 5 0.199375 -0.001367 0.250127 x

x Nb 6 0.200463 0.002609 0.749868 x

x Nb 7 0.200004 0.000097 0.000104 x

x Nb 8 0.200005 0.000131 0.499899 x

x Nb 9 0.399873 -0.001419 0.250152 x

x Nb 10 0.400309 0.001236 0.749878 x

x Nb 11 0.399843 0.000423 0.000078 x

x Nb 12 0.399832 0.000356 0.499906 x

x Nb 13 0.599688 -0.001248 0.250121 x

x Nb 14 0.600126 0.001423 0.749846 x

x Nb 15 0.600155 -0.000436 -0.000077 x

x Nb 16 0.600167 -0.000364 0.500093 x

x Nb 17 0.799541 -0.002602 0.250132 x

x Nb 18 0.800627 0.001355 0.749873 x

x Nb 19 0.799997 -0.000078 -0.000108 x

x Nb 20 0.799995 -0.000117 0.500104 x

xxxxxxxxxxxxxxxxxxxxxxxxxxxxxxxxxxxxxxxxxxxxxxxxxxxxxxxxxxxx

------------------------------------------------------------------------ <-- SCF

SCF loop Energy Energy gain Timer <-- SCF

per atom (sec) <-- SCF

------------------------------------------------------------------------ <-- SCF

Initial -3.62597453E+004 10297.98 <-- SCF

1 -3.62600388E+004 7.33856309E-003 10324.84 <-- SCF

2 -3.62600524E+004 3.40358158E-004 10354.53 <-- SCF

3 -3.62600037E+004 -1.21878478E-003 10383.62 <-- SCF

4 -3.62597993E+004 -5.10851314E-003 10411.09 <-- SCF

5 -3.62598037E+004 1.08970411E-004 10439.62 <-- SCF

6 -3.62598031E+004 -1.58650068E-005 10462.70 <-- SCF

7 -3.62598029E+004 -2.86042817E-006 10485.97 <-- SCF

8 -3.62598030E+004 8.64999052E-007 10503.84 <-- SCF

9 -3.62598030E+004 2.25320631E-007 10520.88 <-- SCF

------------------------------------------------------------------------ <-- SCF

Final energy = -36259.80298296 eV

(energy not corrected for finite basis set)

*********************************** Forces ***********************************

* *

* Cartesian components (eV/A) *

* -------------------------------------------------------------------------- *

* x y z *

* *

* Se 1 0.06659 0.04834 -0.01745 *

* Se 2 -0.16805 0.01959 0.02798 *

* Se 3 -0.16949 0.03982 -0.03168 *

* Se 4 0.09337 0.05250 0.03708 *

* Se 5 0.05271 -0.07612 -0.12796 *

* Se 6 -0.15436 0.02103 0.07675 *

* Se 7 -0.14270 0.03366 -0.08769 *

* Se 8 0.07839 -0.07805 0.11987 *

* Se 9 -0.02739 -0.05768 0.00908 *

* Se 10 0.05655 0.02516 -0.00159 *

* Se 11 0.02727 0.05761 -0.00876 *

* Se 12 -0.05685 -0.02503 0.00132 *

* Se 13 0.14329 -0.03377 0.08678 *

* Se 14 -0.07825 0.07787 -0.11983 *

* Se 15 -0.05286 0.07598 0.12784 *

* Se 16 0.15481 -0.02115 -0.07616 *

* Se 17 0.16897 -0.03985 0.03258 *

* Se 18 -0.09310 -0.05237 -0.03671 *

* Se 19 -0.06617 -0.04817 0.01689 *

* Se 20 0.16751 -0.01958 -0.02870 *

* Nb 1 -0.05057 -0.03101 -0.00881 *

* Nb 2 0.04934 0.03290 0.00873 *

* Nb 3 -0.00043 -0.00060 0.00071 *

* Nb 4 -0.00020 -0.00061 -0.00071 *

* Nb 5 -0.12532 0.04080 -0.00212 *

* Nb 6 0.08022 0.04595 0.00027 *

* Nb 7 -0.00890 0.01660 0.02526 *

* Nb 8 0.00074 0.01932 -0.01773 *

* Nb 9 0.01135 -0.01837 0.00703 *

* Nb 10 -0.02272 0.04785 0.01230 *

* Nb 11 -0.02115 0.02437 0.01504 *

* Nb 12 -0.04056 0.02023 -0.02787 *

* Nb 13 0.02148 -0.04777 -0.01206 *

* Nb 14 -0.01053 0.01989 -0.00703 *

* Nb 15 0.02099 -0.02469 -0.01438 *

* Nb 16 0.04056 -0.02053 0.02738 *

* Nb 17 -0.07919 -0.04752 -0.00012 *

* Nb 18 0.12575 -0.04263 0.00222 *

* Nb 19 0.00950 -0.01560 -0.02661 *

* Nb 20 -0.00057 -0.01839 0.01887 *

* *

******************************************************************************

***************** Stress Tensor *****************

* *

* Cartesian components (GPa) *

* --------------------------------------------- *

* x y z *

* *

* x 0.185371 -0.034471 -0.005790 *

* y -0.034471 0.106038 -0.045459 *

* z -0.005790 -0.045459 -0.108575 *

* *

* Pressure: -0.0609 *

* *

*************************************************

+------------+-------------+-------------+-----------------+ <-- min BFGS

| Step | lambda | F.delta | enthalpy | <-- min BFGS

+------------+-------------+-------------+-----------------+ <-- min BFGS

| previous | 0.000000 | 0.000142 | -36259.800087 | <-- min BFGS

| trial step | 1.000000 | 0.000069 | -36259.803041 | <-- min BFGS

+------------+-------------+-------------+-----------------+ <-- min BFGS

--------------------------------------------------------------------------------

BFGS: improving iteration 13 with line minimization (lambda= 1.948254)

--------------------------------------------------------------------------------

-------------------------------

Unit Cell

-------------------------------

Real Lattice(A) Reciprocal Lattice(1/A)

14.8922852 -8.3595903 0.0005221 0.4202912 -0.0028816 0.0000125

0.0232009 3.3839641 -0.0004199 1.0382682 1.8496345 0.0002374

-0.0004248 -0.0015477 13.9179834 0.0000156 0.0000559 0.4514437

Lattice parameters(A) Cell Angles

a = 17.078141 alpha = 90.013493

b = 3.384044 beta = 89.996655

c = 13.917983 gamma = 118.914288

Current cell volume = 704.095572 A**3

-------------------------------

Cell Contents

-------------------------------

xxxxxxxxxxxxxxxxxxxxxxxxxxxxxxxxxxxxxxxxxxxxxxxxxxxxxxxxxxxx

x Element Atom Fractional coordinates of atoms x

x Number u v w x

x----------------------------------------------------------x

x Se 1 0.066785 0.663347 0.126531 x

x Se 2 0.132934 0.336791 0.626172 x

x Se 3 0.132964 0.336756 0.873719 x

x Se 4 0.066752 0.663192 0.373699 x

x Se 5 0.266627 0.665950 0.126855 x

x Se 6 0.332555 0.335493 0.625724 x

x Se 7 0.332560 0.335525 0.874135 x

x Se 8 0.266591 0.665862 0.373314 x

x Se 9 0.467783 0.665193 0.126484 x

x Se 10 0.532097 0.334265 0.626235 x

x Se 11 0.532216 0.334808 0.873518 x

x Se 12 0.467902 0.665733 0.373766 x

x Se 13 0.667440 0.664478 0.125864 x

x Se 14 0.733408 0.334134 0.626686 x

x Se 15 0.733372 0.334047 0.873146 x

x Se 16 0.667445 0.664509 0.374277 x

x Se 17 0.867036 0.663239 0.126283 x

x Se 18 0.933250 0.336814 0.626300 x

x Se 19 0.933215 0.336656 0.873468 x

x Se 20 0.867067 0.663205 0.373826 x

x Nb 1 -0.000414 -0.001727 0.250115 x

x Nb 2 0.000412 0.001742 0.749885 x

x Nb 3 0.000001 -0.000008 0.000003 x

x Nb 4 0.000001 -0.000005 0.499998 x

x Nb 5 0.199379 -0.001334 0.250123 x

x Nb 6 0.200457 0.002585 0.749873 x

x Nb 7 0.200003 0.000104 0.000107 x

x Nb 8 0.200005 0.000141 0.499898 x

x Nb 9 0.399884 -0.001372 0.250150 x

x Nb 10 0.400289 0.001216 0.749884 x

x Nb 11 0.399845 0.000419 0.000082 x

x Nb 12 0.399832 0.000346 0.499900 x

x Nb 13 0.599708 -0.001228 0.250115 x

x Nb 14 0.600115 0.001376 0.749849 x

x Nb 15 0.600153 -0.000431 -0.000081 x

x Nb 16 0.600168 -0.000354 0.500099 x

x Nb 17 0.799548 -0.002578 0.250127 x

x Nb 18 0.800623 0.001322 0.749877 x

x Nb 19 0.799998 -0.000085 -0.000111 x

x Nb 20 0.799996 -0.000127 0.500105 x

xxxxxxxxxxxxxxxxxxxxxxxxxxxxxxxxxxxxxxxxxxxxxxxxxxxxxxxxxxxx

------------------------------------------------------------------------ <-- SCF

SCF loop Energy Energy gain Timer <-- SCF

per atom (sec) <-- SCF

------------------------------------------------------------------------ <-- SCF

Initial -3.62597489E+004 10619.66 <-- SCF

1 -3.62600531E+004 7.60458099E-003 10647.08 <-- SCF

2 -3.62600669E+004 3.45933956E-004 10675.66 <-- SCF

3 -3.62600221E+004 -1.12045576E-003 10702.09 <-- SCF

4 -3.62597994E+004 -5.56696485E-003 10728.72 <-- SCF

5 -3.62598046E+004 1.27930766E-004 10755.14 <-- SCF

6 -3.62598039E+004 -1.67997041E-005 10777.95 <-- SCF

7 -3.62598038E+004 -3.54871843E-006 10799.53 <-- SCF

8 -3.62598038E+004 9.18078789E-007 10817.66 <-- SCF

9 -3.62598038E+004 2.14602936E-007 10834.83 <-- SCF

------------------------------------------------------------------------ <-- SCF

Final energy = -36259.80379683 eV

(energy not corrected for finite basis set)

*********************************** Forces ***********************************

* *

* Cartesian components (eV/A) *

* -------------------------------------------------------------------------- *

* x y z *

* *

* Se 1 0.09188 0.04142 -0.00168 *

* Se 2 -0.17845 -0.00680 0.05446 *

* Se 3 -0.18294 0.01301 -0.05416 *

* Se 4 0.11293 0.03584 0.00602 *

* Se 5 0.07601 -0.07524 -0.08545 *

* Se 6 -0.16294 0.01098 0.08625 *

* Se 7 -0.15761 0.02491 -0.09770 *

* Se 8 0.09257 -0.07800 0.06159 *

* Se 9 -0.04589 -0.04444 0.01930 *

* Se 10 0.07748 0.01436 0.00645 *

* Se 11 0.04564 0.04444 -0.01881 *

* Se 12 -0.07797 -0.01421 -0.00687 *

* Se 13 0.15838 -0.02504 0.09645 *

* Se 14 -0.09244 0.07781 -0.06152 *

* Se 15 -0.07609 0.07507 0.08526 *

* Se 16 0.16353 -0.01112 -0.08535 *

* Se 17 0.18235 -0.01298 0.05534 *

* Se 18 -0.11262 -0.03575 -0.00551 *

* Se 19 -0.09147 -0.04129 0.00100 *

* Se 20 0.17785 0.00688 -0.05548 *

* Nb 1 -0.04532 -0.02070 -0.00928 *

* Nb 2 0.04373 0.02347 0.00920 *

* Nb 3 -0.00058 -0.00084 0.00105 *

* Nb 4 -0.00034 -0.00084 -0.00104 *

* Nb 5 -0.13509 0.03948 -0.00144 *

* Nb 6 0.09184 0.04381 -0.00350 *

* Nb 7 -0.01012 0.01497 0.02419 *

* Nb 8 0.00243 0.01839 -0.01487 *

* Nb 9 0.00307 -0.01501 0.00843 *

* Nb 10 -0.01014 0.03947 0.01321 *

* Nb 11 -0.02028 0.02579 0.00863 *

* Nb 12 -0.04440 0.02037 -0.02402 *

* Nb 13 0.00848 -0.03948 -0.01299 *

* Nb 14 -0.00199 0.01710 -0.00848 *

* Nb 15 0.02000 -0.02625 -0.00772 *

* Nb 16 0.04439 -0.02076 0.02336 *

* Nb 17 -0.09045 -0.04591 0.00370 *

* Nb 18 0.13568 -0.04216 0.00157 *

* Nb 19 0.01101 -0.01361 -0.02611 *

* Nb 20 -0.00210 -0.01713 0.01653 *

* *

******************************************************************************

***************** Stress Tensor *****************

* *

* Cartesian components (GPa) *

* --------------------------------------------- *

* x y z *

* *

* x 0.228495 -0.028151 -0.006938 *

* y -0.028151 -0.045541 -0.050193 *

* z -0.006938 -0.050193 -0.024327 *

* *

* Pressure: -0.0529 *

* *

*************************************************

+------------+-------------+-------------+-----------------+ <-- min BFGS

| Step | lambda | F.delta | enthalpy | <-- min BFGS

+------------+-------------+-------------+-----------------+ <-- min BFGS

| previous | 0.000000 | 0.000142 | -36259.800087 | <-- min BFGS

| trial step | 1.000000 | 0.000069 | -36259.803041 | <-- min BFGS

| line step | 1.948254 | -0.000016 | -36259.803862 | <-- min BFGS

+------------+-------------+-------------+-----------------+ <-- min BFGS

BFGS: finished iteration 13 with enthalpy= -3.62598039E+004 eV

+-----------+-----------------+-----------------+------------+-----+ <-- BFGS

| Parameter | value | tolerance | units | OK? | <-- BFGS

+-----------+-----------------+-----------------+------------+-----+ <-- BFGS

| dE/ion | 9.437247E-005 | 5.000000E-006 | eV | No | <-- BFGS

| |F|max | 1.912269E-001 | 1.000000E-002 | eV/A | No | <-- BFGS

| |dR|max | 7.560348E-003 | 5.000000E-004 | A | No | <-- BFGS

| Smax | 2.284952E-001 | 2.000000E-002 | GPa | No | <-- BFGS

+-----------+-----------------+-----------------+------------+-----+ <-- BFGS

================================================================================

Starting BFGS iteration 14 ...

================================================================================

+------------+-------------+-------------+-----------------+ <-- min BFGS

| Step | lambda | F.delta | enthalpy | <-- min BFGS

+------------+-------------+-------------+-----------------+ <-- min BFGS

| previous | 0.000000 | 0.000067 | -36259.803862 | <-- min BFGS

+------------+-------------+-------------+-----------------+ <-- min BFGS

--------------------------------------------------------------------------------

BFGS: starting iteration 14 with trial guess (lambda= 1.000000)

--------------------------------------------------------------------------------

-------------------------------

Unit Cell

-------------------------------

Real Lattice(A) Reciprocal Lattice(1/A)

14.8909188 -8.3542701 0.0003973 0.4202946 -0.0029462 0.0000142

0.0237122 3.3827199 -0.0003989 1.0379973 1.8501597 0.0002328

-0.0004793 -0.0014823 13.9201089 0.0000178 0.0000531 0.4513747

Lattice parameters(A) Cell Angles

a = 17.074346 alpha = 90.012872

b = 3.382803 beta = 89.997402

c = 13.920109 gamma = 118.892159

Current cell volume = 703.938581 A**3

-------------------------------

Cell Contents

-------------------------------

xxxxxxxxxxxxxxxxxxxxxxxxxxxxxxxxxxxxxxxxxxxxxxxxxxxxxxxxxxxx

x Element Atom Fractional coordinates of atoms x

x Number u v w x

x----------------------------------------------------------x

x Se 1 0.066798 0.663343 0.126657 x

x Se 2 0.132903 0.336786 0.626303 x

x Se 3 0.132934 0.336765 0.873588 x

x Se 4 0.066767 0.663195 0.373576 x

x Se 5 0.266636 0.665906 0.126967 x

x Se 6 0.332520 0.335473 0.625853 x

x Se 7 0.332526 0.335518 0.874004 x

x Se 8 0.266603 0.665825 0.373199 x

x Se 9 0.467791 0.665115 0.126613 x

x Se 10 0.532091 0.334323 0.626360 x

x Se 11 0.532208 0.334885 0.873389 x

x Se 12 0.467908 0.665676 0.373640 x

x Se 13 0.667474 0.664485 0.125995 x

x Se 14 0.733396 0.334171 0.626802 x

x Se 15 0.733364 0.334090 0.873034 x

x Se 16 0.667480 0.664530 0.374148 x

x Se 17 0.867065 0.663229 0.126415 x

x Se 18 0.933234 0.336811 0.626424 x

x Se 19 0.933203 0.336661 0.873342 x

x Se 20 0.867097 0.663210 0.373695 x

x Nb 1 -0.000429 -0.001802 0.250115 x

x Nb 2 0.000427 0.001819 0.749885 x

x Nb 3 0.000001 -0.000009 0.000003 x

x Nb 4 0.000001 -0.000005 0.499998 x

x Nb 5 0.199349 -0.001380 0.250125 x

x Nb 6 0.200477 0.002694 0.749871 x

x Nb 7 0.200002 0.000112 0.000115 x

x Nb 8 0.200005 0.000154 0.499892 x

x Nb 9 0.399885 -0.001404 0.250154 x

x Nb 10 0.400289 0.001259 0.749884 x

x Nb 11 0.399839 0.000437 0.000088 x

x Nb 12 0.399822 0.000354 0.499891 x

x Nb 13 0.599707 -0.001271 0.250115 x

x Nb 14 0.600114 0.001409 0.749845 x

x Nb 15 0.600159 -0.000450 -0.000086 x

x Nb 16 0.600177 -0.000362 0.500107 x

x Nb 17 0.799528 -0.002687 0.250129 x

x Nb 18 0.800653 0.001367 0.749876 x

x Nb 19 0.799999 -0.000092 -0.000118 x

x Nb 20 0.799995 -0.000139 0.500111 x

xxxxxxxxxxxxxxxxxxxxxxxxxxxxxxxxxxxxxxxxxxxxxxxxxxxxxxxxxxxx

------------------------------------------------------------------------ <-- SCF

SCF loop Energy Energy gain Timer <-- SCF

per atom (sec) <-- SCF

------------------------------------------------------------------------ <-- SCF

Initial -3.62597888E+004 10935.23 <-- SCF

1 -3.62598749E+004 2.15258793E-003 10963.50 <-- SCF

2 -3.62598796E+004 1.17622380E-004 10989.75 <-- SCF

3 -3.62598647E+004 -3.72239966E-004 11016.11 <-- SCF

4 -3.62598042E+004 -1.51326574E-003 11041.81 <-- SCF

5 -3.62598059E+004 4.32827006E-005 11066.25 <-- SCF

6 -3.62598055E+004 -1.14714273E-005 11088.36 <-- SCF

7 -3.62598054E+004 -2.13708274E-006 11108.09 <-- SCF

8 -3.62598054E+004 3.41977074E-007 11126.25 <-- SCF

9 -3.62598054E+004 6.07618761E-007 11143.33 <-- SCF

------------------------------------------------------------------------ <-- SCF

Final energy = -36259.80544070 eV

(energy not corrected for finite basis set)

*********************************** Forces ***********************************

* *

* Cartesian components (eV/A) *

* -------------------------------------------------------------------------- *

* x y z *

* *

* Se 1 0.07852 0.04130 -0.00991 *

* Se 2 -0.17481 0.01505 0.04005 *

* Se 3 -0.17876 0.03500 -0.04195 *

* Se 4 0.10232 0.04137 0.02376 *

* Se 5 0.06781 -0.07074 -0.10761 *

* Se 6 -0.16083 0.02607 0.08182 *

* Se 7 -0.14972 0.03852 -0.08964 *

* Se 8 0.08654 -0.07383 0.09010 *

* Se 9 -0.02911 -0.05725 0.01615 *

* Se 10 0.05880 0.02604 0.00205 *

* Se 11 0.02876 0.05725 -0.01559 *

* Se 12 -0.05937 -0.02587 -0.00252 *

* Se 13 0.15064 -0.03863 0.08830 *

* Se 14 -0.08635 0.07361 -0.09001 *

* Se 15 -0.06783 0.07055 0.10748 *

* Se 16 0.16155 -0.02622 -0.08090 *

* Se 17 0.17807 -0.03503 0.04329 *

* Se 18 -0.10201 -0.04125 -0.02318 *

* Se 19 -0.07813 -0.04113 0.00909 *

* Se 20 0.17410 -0.01501 -0.04115 *

* Nb 1 -0.03982 -0.01561 -0.01017 *

* Nb 2 0.03815 0.01873 0.01003 *

* Nb 3 -0.00065 -0.00097 0.00121 *

* Nb 4 -0.00038 -0.00096 -0.00117 *

* Nb 5 -0.13724 0.03953 -0.00205 *

* Nb 6 0.08948 0.04396 -0.00351 *

* Nb 7 -0.01214 0.01288 0.02381 *

* Nb 8 0.00075 0.01650 -0.01414 *

* Nb 9 -0.00076 -0.01633 0.00791 *

* Nb 10 -0.01362 0.03445 0.01417 *

* Nb 11 -0.02124 0.02844 0.00460 *

* Nb 12 -0.04584 0.02248 -0.02033 *

* Nb 13 0.01183 -0.03447 -0.01394 *

* Nb 14 0.00193 0.01863 -0.00801 *

* Nb 15 0.02092 -0.02897 -0.00360 *

* Nb 16 0.04584 -0.02291 0.01962 *

* Nb 17 -0.08801 -0.04626 0.00373 *

* Nb 18 0.13785 -0.04254 0.00223 *

* Nb 19 0.01313 -0.01132 -0.02596 *

* Nb 20 -0.00040 -0.01508 0.01596 *

* *

******************************************************************************

***************** Stress Tensor *****************

* *

* Cartesian components (GPa) *

* --------------------------------------------- *

* x y z *

* *

* x 0.193351 -0.020650 -0.008382 *

* y -0.020650 -0.093613 -0.050483 *

* z -0.008382 -0.050483 -0.041366 *

* *

* Pressure: -0.0195 *

* *

*************************************************

+------------+-------------+-------------+-----------------+ <-- min BFGS

| Step | lambda | F.delta | enthalpy | <-- min BFGS

+------------+-------------+-------------+-----------------+ <-- min BFGS

| previous | 0.000000 | 0.000067 | -36259.803862 | <-- min BFGS

| trial step | 1.000000 | 0.000049 | -36259.805493 | <-- min BFGS

+------------+-------------+-------------+-----------------+ <-- min BFGS

--------------------------------------------------------------------------------

BFGS: improving iteration 14 with line minimization (lambda= 3.785436)

--------------------------------------------------------------------------------

-------------------------------

Unit Cell

-------------------------------

Real Lattice(A) Reciprocal Lattice(1/A)

14.8871129 -8.3394513 0.0000496 0.4203040 -0.0031264 0.0000188

0.0251366 3.3792543 -0.0003404 1.0372420 1.8516253 0.0002199

-0.0006312 -0.0013003 13.9260292 0.0000239 0.0000453 0.4511828

Lattice parameters(A) Cell Angles

a = 17.063780 alpha = 90.011141

b = 3.379348 beta = 89.999485

c = 13.926029 gamma = 118.830456

Current cell volume = 703.500716 A**3

-------------------------------

Cell Contents

-------------------------------

xxxxxxxxxxxxxxxxxxxxxxxxxxxxxxxxxxxxxxxxxxxxxxxxxxxxxxxxxxxx

x Element Atom Fractional coordinates of atoms x

x Number u v w x

x----------------------------------------------------------x

x Se 1 0.066832 0.663332 0.127008 x

x Se 2 0.132818 0.336773 0.626670 x

x Se 3 0.132851 0.336791 0.873223 x

x Se 4 0.066811 0.663205 0.373231 x

x Se 5 0.266659 0.665784 0.127279 x

x Se 6 0.332423 0.335415 0.626213 x

x Se 7 0.332432 0.335499 0.873639 x

x Se 8 0.266635 0.665722 0.372878 x

x Se 9 0.467813 0.664898 0.126972 x

x Se 10 0.532075 0.334484 0.626710 x

x Se 11 0.532186 0.335102 0.873030 x

x Se 12 0.467923 0.665514 0.373291 x

x Se 13 0.667568 0.664505 0.126360 x

x Se 14 0.733365 0.334274 0.627122 x

x Se 15 0.733340 0.334212 0.872722 x

x Se 16 0.667578 0.664587 0.373789 x

x Se 17 0.867149 0.663204 0.126780 x

x Se 18 0.933191 0.336802 0.626769 x

x Se 19 0.933169 0.336673 0.872991 x

x Se 20 0.867182 0.663222 0.373328 x

x Nb 1 -0.000473 -0.002011 0.250117 x

x Nb 2 0.000471 0.002030 0.749883 x

x Nb 3 0.000001 -0.000011 0.000003 x

x Nb 4 0.000001 -0.000007 0.499997 x

x Nb 5 0.199266 -0.001507 0.250130 x

x Nb 6 0.200532 0.002997 0.749865 x

x Nb 7 0.199999 0.000133 0.000135 x

x Nb 8 0.200006 0.000192 0.499876 x

x Nb 9 0.399888 -0.001493 0.250166 x

x Nb 10 0.400292 0.001379 0.749885 x

x Nb 11 0.399822 0.000490 0.000103 x

x Nb 12 0.399796 0.000376 0.499868 x

x Nb 13 0.599704 -0.001392 0.250114 x

x Nb 14 0.600111 0.001501 0.749833 x

x Nb 15 0.600176 -0.000504 -0.000101 x

x Nb 16 0.600203 -0.000384 0.500130 x

x Nb 17 0.799474 -0.002992 0.250135 x

x Nb 18 0.800737 0.001491 0.749871 x

x Nb 19 0.800002 -0.000110 -0.000140 x

x Nb 20 0.799994 -0.000175 0.500128 x

xxxxxxxxxxxxxxxxxxxxxxxxxxxxxxxxxxxxxxxxxxxxxxxxxxxxxxxxxxxx

------------------------------------------------------------------------ <-- SCF

SCF loop Energy Energy gain Timer <-- SCF

per atom (sec) <-- SCF

------------------------------------------------------------------------ <-- SCF

Initial -3.62596693E+004 11246.48 <-- SCF

1 -3.62604594E+004 1.97532790E-002 11274.30 <-- SCF

2 -3.62605046E+004 1.12916588E-003 11302.48 <-- SCF

3 -3.62603822E+004 -3.05957367E-003 11328.95 <-- SCF

4 -3.62597964E+004 -1.46447736E-002 11355.19 <-- SCF

5 -3.62598100E+004 3.39024688E-004 11381.73 <-- SCF

6 -3.62598070E+004 -7.45718045E-005 11408.08 <-- SCF

7 -3.62598066E+004 -1.00326717E-005 11431.48 <-- SCF

8 -3.62598068E+004 5.18797776E-006 11453.03 <-- SCF

9 -3.62598068E+004 1.24864381E-006 11471.19 <-- SCF

10 -3.62598069E+004 1.09329261E-006 11488.89 <-- SCF

11 -3.62598069E+004 8.09725814E-007 11506.44 <-- SCF

------------------------------------------------------------------------ <-- SCF

Final energy = -36259.80690681 eV

(energy not corrected for finite basis set)

*********************************** Forces ***********************************

* *

* Cartesian components (eV/A) *

* -------------------------------------------------------------------------- *

* x y z *

* *

* Se 1 0.03989 0.02489 -0.03377 *

* Se 2 -0.14749 0.07703 0.00598 *

* Se 3 -0.14774 0.09743 -0.01629 *

* Se 4 0.06850 0.04277 0.04950 *

* Se 5 0.04378 -0.06060 -0.15065 *

* Se 6 -0.12530 0.06001 0.05159 *

* Se 7 -0.10801 0.07226 -0.06311 *

* Se 8 0.06305 -0.06270 0.14770 *

* Se 9 -0.00011 -0.10061 0.00945 *

* Se 10 0.01142 0.05935 -0.01877 *

* Se 11 -0.00043 0.10056 -0.00894 *

* Se 12 -0.01196 -0.05915 0.01834 *

* Se 13 0.10894 -0.07227 0.06179 *

* Se 14 -0.06274 0.06243 -0.14759 *

* Se 15 -0.04363 0.06040 0.15058 *

* Se 16 0.12610 -0.06009 -0.05077 *

* Se 17 0.14693 -0.09764 0.01768 *

* Se 18 -0.06821 -0.04262 -0.04892 *

* Se 19 -0.03951 -0.02464 0.03297 *

* Se 20 0.14669 -0.07717 -0.00704 *

* Nb 1 -0.02491 -0.00406 -0.01053 *

* Nb 2 0.02356 0.00704 0.01031 *

* Nb 3 -0.00063 -0.00094 0.00114 *

* Nb 4 -0.00032 -0.00091 -0.00105 *

* Nb 5 -0.13117 0.04188 -0.00430 *

* Nb 6 0.08116 0.04145 -0.00178 *

* Nb 7 -0.01088 0.00896 0.02101 *

* Nb 8 0.00100 0.01236 -0.01197 *

* Nb 9 -0.00567 -0.01765 0.00409 *

* Nb 10 -0.01794 0.02343 0.01425 *

* Nb 11 -0.02007 0.03094 -0.00333 *

* Nb 12 -0.04370 0.02597 -0.01020 *

* Nb 13 0.01638 -0.02340 -0.01398 *

* Nb 14 0.00668 0.01978 -0.00425 *

* Nb 15 0.01977 -0.03145 0.00425 *

* Nb 16 0.04370 -0.02639 0.00955 *

* Nb 17 -0.07994 -0.04363 0.00198 *

* Nb 18 0.13168 -0.04474 0.00456 *

* Nb 19 0.01185 -0.00738 -0.02305 *

* Nb 20 -0.00071 -0.01092 0.01360 *

* *

******************************************************************************

***************** Stress Tensor *****************

* *

* Cartesian components (GPa) *

* --------------------------------------------- *

* x y z *

* *

* x 0.077657 0.027553 -0.012942 *

* y 0.027553 -0.263546 -0.046494 *

* z -0.012942 -0.046494 -0.112027 *

* *

* Pressure: 0.0993 *

* *

*************************************************

+------------+-------------+-------------+-----------------+ <-- min BFGS

| Step | lambda | F.delta | enthalpy | <-- min BFGS

+------------+-------------+-------------+-----------------+ <-- min BFGS

| previous | 0.000000 | 0.000067 | -36259.803862 | <-- min BFGS

| trial step | 1.000000 | 0.000049 | -36259.805493 | <-- min BFGS

| line step | 3.785436 | -9.305E-007 | -36259.807020 | <-- min BFGS

+------------+-------------+-------------+-----------------+ <-- min BFGS

BFGS: finished iteration 14 with enthalpy= -3.62598070E+004 eV

+-----------+-----------------+-----------------+------------+-----+ <-- BFGS

| Parameter | value | tolerance | units | OK? | <-- BFGS

+-----------+-----------------+-----------------+------------+-----+ <-- BFGS

| dE/ion | 7.896182E-005 | 5.000000E-006 | eV | No | <-- BFGS

| |F|max | 1.777193E-001 | 1.000000E-002 | eV/A | No | <-- BFGS

| |dR|max | 7.233579E-003 | 5.000000E-004 | A | No | <-- BFGS

| Smax | 2.635459E-001 | 2.000000E-002 | GPa | No | <-- BFGS

+-----------+-----------------+-----------------+------------+-----+ <-- BFGS

================================================================================

Starting BFGS iteration 15 ...

================================================================================

Writing analysis data to 2H-Nb1.1Se2-7-UF.castep_bin

Writing model to 2H-Nb1.1Se2-7-UF.check

+------------+-------------+-------------+-----------------+ <-- min BFGS

| Step | lambda | F.delta | enthalpy | <-- min BFGS

+------------+-------------+-------------+-----------------+ <-- min BFGS

| previous | 0.000000 | 0.000075 | -36259.807020 | <-- min BFGS

+------------+-------------+-------------+-----------------+ <-- min BFGS

--------------------------------------------------------------------------------

BFGS: starting iteration 15 with trial guess (lambda= 1.000000)

--------------------------------------------------------------------------------

-------------------------------

Unit Cell

-------------------------------

Real Lattice(A) Reciprocal Lattice(1/A)

14.8908834 -8.3336828 -0.0001370 0.4201586 -0.0031983 0.0000209

0.0257130 3.3779524 -0.0003044 1.0365653 1.8521671 0.0002094

-0.0007025 -0.0011814 13.9298300 0.0000268 0.0000404 0.4510597

Lattice parameters(A) Cell Angles

a = 17.064251 alpha = 90.010043

b = 3.378050 beta = 90.000608

c = 13.929830 gamma = 118.797430

Current cell volume = 703.665056 A**3

-------------------------------

Cell Contents

-------------------------------

xxxxxxxxxxxxxxxxxxxxxxxxxxxxxxxxxxxxxxxxxxxxxxxxxxxxxxxxxxxx

x Element Atom Fractional coordinates of atoms x

x Number u v w x

x----------------------------------------------------------x

x Se 1 0.066849 0.663474 0.126959 x

x Se 2 0.132765 0.336638 0.626644 x

x Se 3 0.132797 0.336693 0.873244 x

x Se 4 0.066839 0.663387 0.373286 x

x Se 5 0.266674 0.665706 0.127169 x

x Se 6 0.332376 0.335284 0.626208 x

x Se 7 0.332389 0.335403 0.873635 x

x Se 8 0.266659 0.665668 0.372984 x

x Se 9 0.467791 0.664776 0.126935 x

x Se 10 0.532109 0.334578 0.626665 x

x Se 11 0.532209 0.335224 0.873067 x

x Se 12 0.467890 0.665421 0.373335 x

x Se 13 0.667612 0.664601 0.126363 x

x Se 14 0.733340 0.334327 0.627016 x

x Se 15 0.733325 0.334290 0.872832 x

x Se 16 0.667625 0.664719 0.373794 x

x Se 17 0.867202 0.663300 0.126759 x

x Se 18 0.933163 0.336620 0.626715 x

x Se 19 0.933153 0.336531 0.873039 x

x Se 20 0.867235 0.663357 0.373353 x

x Nb 1 -0.000489 -0.002101 0.250112 x

x Nb 2 0.000486 0.002122 0.749888 x

x Nb 3 0.000000 -0.000012 0.000003 x

x Nb 4 0.000001 -0.000008 0.499997 x

x Nb 5 0.199225 -0.001546 0.250128 x

x Nb 6 0.200555 0.003131 0.749867 x

x Nb 7 0.199997 0.000147 0.000148 x

x Nb 8 0.200007 0.000219 0.499867 x

x Nb 9 0.399898 -0.001499 0.250169 x

x Nb 10 0.400276 0.001416 0.749891 x

x Nb 11 0.399815 0.000514 0.000111 x

x Nb 12 0.399782 0.000377 0.499853 x

x Nb 13 0.599720 -0.001429 0.250108 x

x Nb 14 0.600102 0.001510 0.749830 x

x Nb 15 0.600183 -0.000529 -0.000109 x

x Nb 16 0.600217 -0.000386 0.500145 x

x Nb 17 0.799451 -0.003127 0.250134 x

x Nb 18 0.800778 0.001528 0.749872 x

x Nb 19 0.800005 -0.000122 -0.000153 x

x Nb 20 0.799994 -0.000200 0.500138 x

xxxxxxxxxxxxxxxxxxxxxxxxxxxxxxxxxxxxxxxxxxxxxxxxxxxxxxxxxxxx

------------------------------------------------------------------------ <-- SCF

SCF loop Energy Energy gain Timer <-- SCF

per atom (sec) <-- SCF

------------------------------------------------------------------------ <-- SCF

Initial -3.62597987E+004 11610.03 <-- SCF

1 -3.62598343E+004 8.89788931E-004 11637.34 <-- SCF

2 -3.62598364E+004 5.08903127E-005 11663.08 <-- SCF

3 -3.62598338E+004 -6.33105622E-005 11689.67 <-- SCF

4 -3.62598077E+004 -6.53101513E-004 11715.59 <-- SCF

5 -3.62598096E+004 4.79083982E-005 11739.66 <-- SCF

6 -3.62598092E+004 -1.05835874E-005 11760.17 <-- SCF

7 -3.62598089E+004 -7.11239585E-006 11779.67 <-- SCF

8 -3.62598089E+004 3.89025266E-007 11797.36 <-- SCF

9 -3.62598090E+004 6.99157220E-007 11814.05 <-- SCF

------------------------------------------------------------------------ <-- SCF

Final energy = -36259.80895394 eV

(energy not corrected for finite basis set)

*********************************** Forces ***********************************

* *

* Cartesian components (eV/A) *

* -------------------------------------------------------------------------- *

* x y z *

* *

* Se 1 0.04386 0.02206 -0.03222 *

* Se 2 -0.14469 0.07249 0.00624 *

* Se 3 -0.14756 0.09263 -0.01630 *

* Se 4 0.07101 0.03878 0.04949 *

* Se 5 0.04835 -0.05427 -0.14531 *

* Se 6 -0.12528 0.06110 0.04822 *

* Se 7 -0.10674 0.07383 -0.05988 *

* Se 8 0.06250 -0.05686 0.13977 *

* Se 9 0.00213 -0.10012 0.01487 *

* Se 10 0.00993 0.06039 -0.01876 *

* Se 11 -0.00282 0.10011 -0.01416 *

* Se 12 -0.01062 -0.06015 0.01822 *

* Se 13 0.10791 -0.07381 0.05818 *

* Se 14 -0.06221 0.05656 -0.13959 *

* Se 15 -0.04817 0.05405 0.14526 *

* Se 16 0.12628 -0.06120 -0.04715 *

* Se 17 0.14664 -0.09291 0.01800 *

* Se 18 -0.07067 -0.03860 -0.04879 *

* Se 19 -0.04347 -0.02178 0.03119 *

* Se 20 0.14379 -0.07264 -0.00754 *

* Nb 1 -0.00746 0.00901 -0.01109 *

* Nb 2 0.00580 -0.00531 0.01080 *

* Nb 3 -0.00082 -0.00116 0.00146 *

* Nb 4 -0.00046 -0.00114 -0.00134 *

* Nb 5 -0.13797 0.03660 -0.00411 *

* Nb 6 0.07882 0.04223 -0.00460 *

* Nb 7 -0.01815 0.00714 0.01739 *

* Nb 8 -0.00406 0.01072 -0.00768 *

* Nb 9 -0.01190 -0.01821 0.00436 *

* Nb 10 -0.01649 0.01577 0.01453 *

* Nb 11 -0.02000 0.03150 -0.01481 *

* Nb 12 -0.04678 0.02584 0.00019 *

* Nb 13 0.01456 -0.01582 -0.01428 *

* Nb 14 0.01327 0.02084 -0.00466 *

* Nb 15 0.01959 -0.03214 0.01597 *

* Nb 16 0.04680 -0.02634 -0.00096 *

* Nb 17 -0.07734 -0.04481 0.00486 *

* Nb 18 0.13856 -0.04017 0.00448 *

* Nb 19 0.01941 -0.00522 -0.01997 *

* Nb 20 0.00446 -0.00900 0.00974 *

* *

******************************************************************************

***************** Stress Tensor *****************

* *

* Cartesian components (GPa) *

* --------------------------------------------- *

* x y z *

* *

* x 0.151851 0.052812 -0.013764 *

* y 0.052812 -0.293928 -0.044014 *

* z -0.013764 -0.044014 -0.026371 *

* *

* Pressure: 0.0561 *

* *

*************************************************

+------------+-------------+-------------+-----------------+ <-- min BFGS

| Step | lambda | F.delta | enthalpy | <-- min BFGS

+------------+-------------+-------------+-----------------+ <-- min BFGS

| previous | 0.000000 | 0.000075 | -36259.807020 | <-- min BFGS

| trial step | 1.000000 | 0.000061 | -36259.809094 | <-- min BFGS

+------------+-------------+-------------+-----------------+ <-- min BFGS

--------------------------------------------------------------------------------

BFGS: improving iteration 15 with line minimization (lambda= 5.209139)

--------------------------------------------------------------------------------

-------------------------------

Unit Cell

-------------------------------

Real Lattice(A) Reciprocal Lattice(1/A)

14.9067539 -8.3094028 -0.0009224 0.4195479 -0.0035006 0.0000300

0.0281394 3.3724725 -0.0001524 1.0337201 1.8544546 0.0001649

-0.0010029 -0.0006811 13.9458280 0.0000390 0.0000200 0.4505423

Lattice parameters(A) Cell Angles

a = 17.066268 alpha = 90.005422

b = 3.372590 beta = 90.005333

c = 13.945828 gamma = 118.658348

Current cell volume = 704.354101 A**3

-------------------------------

Cell Contents

-------------------------------

xxxxxxxxxxxxxxxxxxxxxxxxxxxxxxxxxxxxxxxxxxxxxxxxxxxxxxxxxxxx

x Element Atom Fractional coordinates of atoms x

x Number u v w x

x----------------------------------------------------------x

x Se 1 0.066919 0.664073 0.126754 x

x Se 2 0.132538 0.336071 0.626535 x

x Se 3 0.132572 0.336284 0.873332 x

x Se 4 0.066957 0.664153 0.373515 x

x Se 5 0.266737 0.665378 0.126708 x

x Se 6 0.332179 0.334733 0.626187 x

x Se 7 0.332209 0.334999 0.873621 x

x Se 8 0.266764 0.665442 0.373429 x

x Se 9 0.467695 0.664259 0.126779 x

x Se 10 0.532249 0.334973 0.626479 x

x Se 11 0.532304 0.335739 0.873224 x

x Se 12 0.467749 0.665025 0.373521 x

x Se 13 0.667793 0.665006 0.126375 x

x Se 14 0.733236 0.334553 0.626571 x

x Se 15 0.733262 0.334616 0.873293 x

x Se 16 0.667823 0.665271 0.373815 x

x Se 17 0.867427 0.663708 0.126673 x

x Se 18 0.933045 0.335857 0.626486 x

x Se 19 0.933083 0.335934 0.873244 x

x Se 20 0.867461 0.663922 0.373460 x

x Nb 1 -0.000555 -0.002479 0.250094 x

x Nb 2 0.000550 0.002506 0.749906 x

x Nb 3 -0.000000 -0.000017 0.000005 x

x Nb 4 0.000000 -0.000013 0.499996 x

x Nb 5 0.199054 -0.001709 0.250122 x

x Nb 6 0.200655 0.003692 0.749872 x

x Nb 7 0.199985 0.000206 0.000200 x

x Nb 8 0.200009 0.000332 0.499829 x

x Nb 9 0.399938 -0.001526 0.250181 x

x Nb 10 0.400210 0.001571 0.749918 x

x Nb 11 0.399785 0.000619 0.000148 x

x Nb 12 0.399722 0.000383 0.499790 x

x Nb 13 0.599784 -0.001587 0.250082 x

x Nb 14 0.600063 0.001548 0.749818 x

x Nb 15 0.600213 -0.000636 -0.000145 x

x Nb 16 0.600278 -0.000393 0.500207 x

x Nb 17 0.799352 -0.003696 0.250129 x

x Nb 18 0.800949 0.001682 0.749879 x

x Nb 19 0.800017 -0.000174 -0.000207 x

x Nb 20 0.799991 -0.000307 0.500178 x

xxxxxxxxxxxxxxxxxxxxxxxxxxxxxxxxxxxxxxxxxxxxxxxxxxxxxxxxxxxx

------------------------------------------------------------------------ <-- SCF

SCF loop Energy Energy gain Timer <-- SCF

per atom (sec) <-- SCF

------------------------------------------------------------------------ <-- SCF

Initial -3.62596357E+004 11917.52 <-- SCF

1 -3.62601909E+004 1.38785941E-002 11944.86 <-- SCF

2 -3.62602217E+004 7.71928145E-004 11973.55 <-- SCF

3 -3.62601017E+004 -2.99998212E-003 11999.80 <-- SCF

4 -3.62598070E+004 -7.36822532E-003 12025.73 <-- SCF

5 -3.62598195E+004 3.12795247E-004 12052.50 <-- SCF

6 -3.62598135E+004 -1.50955205E-004 12078.20 <-- SCF

7 -3.62598118E+004 -4.30471939E-005 12101.83 <-- SCF

8 -3.62598118E+004 9.12014606E-007 12122.36 <-- SCF

9 -3.62598119E+004 2.93919016E-006 12140.22 <-- SCF

10 -3.62598120E+004 2.03635357E-006 12157.59 <-- SCF

11 -3.62598120E+004 1.37913581E-006 12174.95 <-- SCF

12 -3.62598121E+004 1.16265198E-006 12191.28 <-- SCF

13 -3.62598121E+004 1.01423982E-006 12207.48 <-- SCF

14 -3.62598122E+004 1.00121788E-006 12224.38 <-- SCF

15 -3.62598122E+004 8.25355026E-007 12240.91 <-- SCF

------------------------------------------------------------------------ <-- SCF

Final energy = -36259.81220697 eV

(energy not corrected for finite basis set)

*********************************** Forces ***********************************

* *

* Cartesian components (eV/A) *

* -------------------------------------------------------------------------- *

* x y z *

* *

* Se 1 0.06918 0.00163 -0.01826 *

* Se 2 -0.10176 0.05058 0.02167 *

* Se 3 -0.10481 0.06715 -0.03250 *

* Se 4 0.08171 0.00719 0.02582 *

* Se 5 0.07037 -0.03044 -0.07866 *

* Se 6 -0.10359 0.06464 0.03646 *

* Se 7 -0.07641 0.07866 -0.05120 *

* Se 8 0.05934 -0.03235 0.04465 *

* Se 9 0.00843 -0.10266 0.02961 *

* Se 10 0.00641 0.07004 -0.01853 *

* Se 11 -0.00924 0.10276 -0.02871 *

* Se 12 -0.00726 -0.06972 0.01811 *

* Se 13 0.07792 -0.07835 0.04895 *

* Se 14 -0.05920 0.03201 -0.04448 *

* Se 15 -0.07006 0.03016 0.07865 *

* Se 16 0.10480 -0.06458 -0.03519 *

* Se 17 0.10404 -0.06785 0.03438 *

* Se 18 -0.08150 -0.00692 -0.02526 *

* Se 19 -0.06895 -0.00119 0.01716 *

* Se 20 0.10099 -0.05099 -0.02302 *

* Nb 1 0.04662 0.05288 -0.00800 *

* Nb 2 -0.04855 -0.04824 0.00761 *

* Nb 3 -0.00091 -0.00171 0.00175 *

* Nb 4 -0.00054 -0.00163 -0.00152 *

* Nb 5 -0.13060 0.02336 -0.00158 *

* Nb 6 0.07952 0.03577 -0.01258 *

* Nb 7 -0.02137 0.00139 0.00601 *

* Nb 8 -0.00201 0.00466 0.00467 *

* Nb 9 -0.04394 -0.01488 0.00361 *

* Nb 10 0.00778 -0.01591 0.01019 *

* Nb 11 -0.01723 0.03281 -0.04480 *

* Nb 12 -0.04954 0.02647 0.03193 *

* Nb 13 -0.00994 0.01591 -0.01001 *

* Nb 14 0.04542 0.01786 -0.00414 *

* Nb 15 0.01676 -0.03372 0.04616 *

* Nb 16 0.04974 -0.02711 -0.03266 *

* Nb 17 -0.07798 -0.03891 0.01299 *

* Nb 18 0.13133 -0.02767 0.00210 *

* Nb 19 0.02276 0.00126 -0.00904 *

* Nb 20 0.00227 -0.00233 -0.00235 *

* *

******************************************************************************

***************** Stress Tensor *****************

* *

* Cartesian components (GPa) *

* --------------------------------------------- *

* x y z *

* *

* x 0.459784 0.136250 -0.015759 *

* y 0.136250 -0.396334 -0.038285 *

* z -0.015759 -0.038285 0.293732 *

* *

* Pressure: -0.1191 *

* *

*************************************************

+------------+-------------+-------------+-----------------+ <-- min BFGS

| Step | lambda | F.delta | enthalpy | <-- min BFGS

+------------+-------------+-------------+-----------------+ <-- min BFGS

| previous | 0.000000 | 0.000075 | -36259.807020 | <-- min BFGS

| trial step | 1.000000 | 0.000061 | -36259.809094 | <-- min BFGS

| line step | 5.209139 | -0.000017 | -36259.812380 | <-- min BFGS

+------------+-------------+-------------+-----------------+ <-- min BFGS

BFGS: finished iteration 15 with enthalpy= -3.62598124E+004 eV

+-----------+-----------------+-----------------+------------+-----+ <-- BFGS

| Parameter | value | tolerance | units | OK? | <-- BFGS

+-----------+-----------------+-----------------+------------+-----+ <-- BFGS

| dE/ion | 1.339998E-004 | 5.000000E-006 | eV | No | <-- BFGS

| |F|max | 1.342312E-001 | 1.000000E-002 | eV/A | No | <-- BFGS

| |dR|max | 8.292443E-003 | 5.000000E-004 | A | No | <-- BFGS

| Smax | 4.597838E-001 | 2.000000E-002 | GPa | No | <-- BFGS

+-----------+-----------------+-----------------+------------+-----+ <-- BFGS

================================================================================

Starting BFGS iteration 16 ...

================================================================================

+------------+-------------+-------------+-----------------+ <-- min BFGS

| Step | lambda | F.delta | enthalpy | <-- min BFGS

+------------+-------------+-------------+-----------------+ <-- min BFGS

| previous | 0.000000 | 0.000169 | -36259.812380 | <-- min BFGS

+------------+-------------+-------------+-----------------+ <-- min BFGS

--------------------------------------------------------------------------------

BFGS: starting iteration 16 with trial guess (lambda= 1.000000)

--------------------------------------------------------------------------------

-------------------------------

Unit Cell

-------------------------------

Real Lattice(A) Reciprocal Lattice(1/A)

14.8986341 -8.3199319 -0.0015815 0.4198110 -0.0034344 0.0000180

0.0276164 3.3757330 0.0003225 1.0346788 1.8528157 -0.0000697

-0.0005905 0.0008542 13.9402480 0.0000237 -0.0000433 0.4507226

Lattice parameters(A) Cell Angles

a = 17.064307 alpha = 89.991035

b = 3.375846 beta = 90.009141

c = 13.940248 gamma = 118.711840

Current cell volume = 704.311199 A**3

-------------------------------

Cell Contents

-------------------------------

xxxxxxxxxxxxxxxxxxxxxxxxxxxxxxxxxxxxxxxxxxxxxxxxxxxxxxxxxxxx

x Element Atom Fractional coordinates of atoms x

x Number u v w x

x----------------------------------------------------------x

x Se 1 0.066931 0.664097 0.126755 x

x Se 2 0.132515 0.336068 0.626546 x

x Se 3 0.132547 0.336290 0.873322 x

x Se 4 0.066972 0.664188 0.373515 x

x Se 5 0.266749 0.665375 0.126694 x

x Se 6 0.332156 0.334740 0.626204 x

x Se 7 0.332190 0.335021 0.873605 x

x Se 8 0.266776 0.665436 0.373436 x

x Se 9 0.467699 0.664189 0.126789 x

x Se 10 0.532247 0.335022 0.626483 x

x Se 11 0.532300 0.335809 0.873213 x

x Se 12 0.467751 0.664976 0.373517 x

x Se 13 0.667812 0.664984 0.126391 x

x Se 14 0.733224 0.334559 0.626565 x

x Se 15 0.733251 0.334619 0.873306 x

x Se 16 0.667845 0.665264 0.373799 x

x Se 17 0.867451 0.663701 0.126683 x

x Se 18 0.933030 0.335822 0.626487 x

x Se 19 0.933070 0.335911 0.873243 x

x Se 20 0.867484 0.663925 0.373449 x

x Nb 1 -0.000554 -0.002458 0.250092 x

x Nb 2 0.000550 0.002488 0.749908 x

x Nb 3 -0.000000 -0.000018 0.000005 x

x Nb 4 0.000000 -0.000014 0.499995 x

x Nb 5 0.199030 -0.001747 0.250121 x

x Nb 6 0.200671 0.003758 0.749870 x

x Nb 7 0.199982 0.000204 0.000203 x

x Nb 8 0.200009 0.000339 0.499828 x

x Nb 9 0.399931 -0.001553 0.250182 x

x Nb 10 0.400213 0.001578 0.749921 x

x Nb 11 0.399782 0.000632 0.000142 x

x Nb 12 0.399714 0.000379 0.499793 x

x Nb 13 0.599781 -0.001594 0.250079 x

x Nb 14 0.600070 0.001578 0.749816 x

x Nb 15 0.600216 -0.000650 -0.000139 x

x Nb 16 0.600286 -0.000390 0.500204 x

x Nb 17 0.799336 -0.003763 0.250131 x

x Nb 18 0.800974 0.001718 0.749880 x

x Nb 19 0.800020 -0.000169 -0.000211 x

x Nb 20 0.799991 -0.000312 0.500179 x

xxxxxxxxxxxxxxxxxxxxxxxxxxxxxxxxxxxxxxxxxxxxxxxxxxxxxxxxxxxx

------------------------------------------------------------------------ <-- SCF

SCF loop Energy Energy gain Timer <-- SCF

per atom (sec) <-- SCF

------------------------------------------------------------------------ <-- SCF

Initial -3.62597994E+004 12344.22 <-- SCF

1 -3.62598195E+004 5.03629924E-004 12368.27 <-- SCF

2 -3.62598204E+004 2.13212714E-005 12393.91 <-- SCF

3 -3.62598172E+004 -8.05249519E-005 12419.62 <-- SCF

4 -3.62598165E+004 -1.55215774E-005 12442.17 <-- SCF

5 -3.62598163E+004 -6.31102253E-006 12463.22 <-- SCF

6 -3.62598163E+004 6.58831525E-007 12480.53 <-- SCF

7 -3.62598163E+004 7.39616403E-007 12496.97 <-- SCF

------------------------------------------------------------------------ <-- SCF

Final energy = -36259.81634453 eV

(energy not corrected for finite basis set)

*********************************** Forces ***********************************

* *

* Cartesian components (eV/A) *

* -------------------------------------------------------------------------- *

* x y z *

* *

* Se 1 0.05089 0.00442 -0.02029 *

* Se 2 -0.08276 0.04703 0.01826 *

* Se 3 -0.08616 0.06261 -0.03031 *

* Se 4 0.06277 0.01091 0.02998 *

* Se 5 0.05478 -0.02489 -0.08203 *

* Se 6 -0.08836 0.05711 0.03307 *

* Se 7 -0.06249 0.07163 -0.04944 *

* Se 8 0.04260 -0.02728 0.04653 *

* Se 9 0.00000 -0.09968 0.03379 *

* Se 10 0.01458 0.06624 -0.01913 *

* Se 11 -0.00092 0.09980 -0.03278 *

* Se 12 -0.01552 -0.06589 0.01865 *

* Se 13 0.06411 -0.07126 0.04692 *

* Se 14 -0.04247 0.02687 -0.04632 *

* Se 15 -0.05447 0.02455 0.08200 *

* Se 16 0.08965 -0.05703 -0.03164 *

* Se 17 0.08535 -0.06338 0.03237 *

* Se 18 -0.06253 -0.01066 -0.02939 *

* Se 19 -0.05066 -0.00400 0.01913 *

* Se 20 0.08197 -0.04750 -0.01975 *

* Nb 1 0.06870 0.05407 -0.00965 *

* Nb 2 -0.07075 -0.04912 0.00925 *

* Nb 3 -0.00100 -0.00178 0.00186 *

* Nb 4 -0.00063 -0.00171 -0.00162 *

* Nb 5 -0.12984 0.01652 -0.00198 *

* Nb 6 0.07298 0.04412 -0.01450 *

* Nb 7 -0.02660 0.00144 0.00719 *

* Nb 8 -0.00402 0.00558 0.00498 *

* Nb 9 -0.03154 -0.02225 0.00473 *

* Nb 10 -0.00520 -0.01444 0.01219 *

* Nb 11 -0.01521 0.03440 -0.05199 *

* Nb 12 -0.05212 0.02705 0.03670 *

* Nb 13 0.00282 0.01434 -0.01203 *

* Nb 14 0.03326 0.02543 -0.00534 *

* Nb 15 0.01466 -0.03532 0.05349 *

* Nb 16 0.05242 -0.02764 -0.03746 *

* Nb 17 -0.07137 -0.04743 0.01499 *

* Nb 18 0.13065 -0.02108 0.00254 *

* Nb 19 0.02816 0.00137 -0.01048 *

* Nb 20 0.00429 -0.00316 -0.00251 *

* *

******************************************************************************

***************** Stress Tensor *****************

* *

* Cartesian components (GPa) *

* --------------------------------------------- *

* x y z *

* *

* x 0.313205 0.109719 -0.010989 *

* y 0.109719 -0.259974 -0.004327 *

* z -0.010989 -0.004327 0.239953 *

* *

* Pressure: -0.0977 *

* *

*************************************************

+------------+-------------+-------------+-----------------+ <-- min BFGS

| Step | lambda | F.delta | enthalpy | <-- min BFGS

+------------+-------------+-------------+-----------------+ <-- min BFGS

| previous | 0.000000 | 0.000169 | -36259.812380 | <-- min BFGS

| trial step | 1.000000 | 0.000123 | -36259.816540 | <-- min BFGS

+------------+-------------+-------------+-----------------+ <-- min BFGS

--------------------------------------------------------------------------------

BFGS: improving iteration 16 with line minimization (lambda= 3.670792)

--------------------------------------------------------------------------------

-------------------------------

Unit Cell

-------------------------------

Real Lattice(A) Reciprocal Lattice(1/A)

14.8769480 -8.3480529 -0.0033419 0.4205156 -0.0032578 -0.0000143

0.0262196 3.3844413 0.0015911 1.0372427 1.8484559 -0.0006957

0.0005112 0.0049544 13.9253449 -0.0000176 -0.0002120 0.4512051

Lattice parameters(A) Cell Angles

a = 17.059120 alpha = 89.952665

b = 3.384543 beta = 90.019366

c = 13.925346 gamma = 118.854667

Current cell volume = 704.191197 A**3

-------------------------------

Cell Contents

-------------------------------

xxxxxxxxxxxxxxxxxxxxxxxxxxxxxxxxxxxxxxxxxxxxxxxxxxxxxxxxxxxx

x Element Atom Fractional coordinates of atoms x

x Number u v w x

x----------------------------------------------------------x

x Se 1 0.066965 0.664159 0.126757 x

x Se 2 0.132451 0.336060 0.626576 x

x Se 3 0.132482 0.336305 0.873295 x

x Se 4 0.067012 0.664281 0.373513 x

x Se 5 0.266781 0.665367 0.126659 x

x Se 6 0.332097 0.334761 0.626248 x

x Se 7 0.332139 0.335080 0.873561 x

x Se 8 0.266808 0.665420 0.373454 x

x Se 9 0.467710 0.664002 0.126817 x

x Se 10 0.532239 0.335154 0.626494 x

x Se 11 0.532288 0.335996 0.873186 x

x Se 12 0.467759 0.664843 0.373505 x

x Se 13 0.667864 0.664927 0.126434 x

x Se 14 0.733192 0.334574 0.626547 x

x Se 15 0.733219 0.334627 0.873341 x

x Se 16 0.667904 0.665245 0.373755 x

x Se 17 0.867516 0.663685 0.126711 x

x Se 18 0.932990 0.335729 0.626488 x

x Se 19 0.933037 0.335850 0.873240 x

x Se 20 0.867547 0.663931 0.373419 x

x Nb 1 -0.000554 -0.002403 0.250086 x

x Nb 2 0.000548 0.002439 0.749914 x

x Nb 3 -0.000001 -0.000022 0.000006 x

x Nb 4 0.000000 -0.000017 0.499995 x

x Nb 5 0.198965 -0.001850 0.250120 x

x Nb 6 0.200715 0.003935 0.749864 x

x Nb 7 0.199975 0.000196 0.000210 x

x Nb 8 0.200009 0.000357 0.499827 x

x Nb 9 0.399912 -0.001624 0.250185 x

x Nb 10 0.400222 0.001595 0.749928 x

x Nb 11 0.399773 0.000667 0.000126 x

x Nb 12 0.399692 0.000369 0.499801 x

x Nb 13 0.599771 -0.001615 0.250072 x

x Nb 14 0.600089 0.001657 0.749814 x

x Nb 15 0.600224 -0.000687 -0.000121 x

x Nb 16 0.600307 -0.000381 0.500195 x

x Nb 17 0.799293 -0.003943 0.250137 x

x Nb 18 0.801039 0.001813 0.749881 x

x Nb 19 0.800028 -0.000156 -0.000220 x

x Nb 20 0.799992 -0.000326 0.500181 x

xxxxxxxxxxxxxxxxxxxxxxxxxxxxxxxxxxxxxxxxxxxxxxxxxxxxxxxxxxxx

------------------------------------------------------------------------ <-- SCF

SCF loop Energy Energy gain Timer <-- SCF

per atom (sec) <-- SCF

------------------------------------------------------------------------ <-- SCF

Initial -3.62597016E+004 12599.91 <-- SCF

1 -3.62598476E+004 3.64974250E-003 12623.91 <-- SCF

2 -3.62598573E+004 2.43659108E-004 12653.00 <-- SCF

3 -3.62598383E+004 -4.75877401E-004 12679.70 <-- SCF

4 -3.62598221E+004 -4.04209966E-004 12705.78 <-- SCF

5 -3.62598219E+004 -5.47497735E-006 12732.58 <-- SCF

6 -3.62598209E+004 -2.41442396E-005 12755.31 <-- SCF

7 -3.62598209E+004 -3.57209071E-008 12774.61 <-- SCF

8 -3.62598210E+004 2.50268731E-006 12792.02 <-- SCF

9 -3.62598211E+004 2.23292282E-006 12808.20 <-- SCF

10 -3.62598212E+004 1.95923814E-006 12824.36 <-- SCF

11 -3.62598213E+004 1.76063023E-006 12840.61 <-- SCF

12 -3.62598213E+004 1.76617562E-006 12856.69 <-- SCF

13 -3.62598214E+004 1.66496943E-006 12873.02 <-- SCF

14 -3.62598215E+004 1.65972628E-006 12889.41 <-- SCF

15 -3.62598215E+004 1.63865903E-006 12905.61 <-- SCF

16 -3.62598216E+004 1.59414478E-006 12921.69 <-- SCF

17 -3.62598217E+004 1.51286926E-006 12938.22 <-- SCF

18 -3.62598217E+004 1.52437365E-006 12954.48 <-- SCF

19 -3.62598218E+004 1.46972980E-006 12970.69 <-- SCF

20 -3.62598218E+004 1.43508299E-006 12986.89 <-- SCF

21 -3.62598219E+004 1.48140558E-006 13003.19 <-- SCF

22 -3.62598220E+004 1.40419997E-006 13019.52 <-- SCF

23 -3.62598220E+004 1.39298111E-006 13035.56 <-- SCF

24 -3.62598221E+004 1.26730288E-006 13051.62 <-- SCF

25 -3.62598221E+004 1.32064541E-006 13067.70 <-- SCF

26 -3.62598222E+004 1.08662224E-006 13084.06 <-- SCF

27 -3.62598222E+004 1.49882040E-006 13100.22 <-- SCF

28 -3.62598223E+004 7.23089900E-007 13116.50 <-- SCF

29 -3.62598223E+004 9.95406751E-007 13132.62 <-- SCF

------------------------------------------------------------------------ <-- SCF

Final energy = -36259.82229384 eV

(energy not corrected for finite basis set)

*********************************** Forces ***********************************

* *

* Cartesian components (eV/A) *

* -------------------------------------------------------------------------- *

* x y z *

* *

* Se 1 0.00389 0.01120 -0.02309 *

* Se 2 -0.02823 0.03723 0.01018 *

* Se 3 -0.02987 0.05139 -0.02621 *

* Se 4 0.01302 0.02029 0.03735 *

* Se 5 0.02040 -0.01265 -0.08336 *

* Se 6 -0.04257 0.03795 0.02406 *

* Se 7 -0.02270 0.05295 -0.04638 *

* Se 8 0.00316 -0.01598 0.04650 *

* Se 9 -0.02644 -0.09134 0.04873 *

* Se 10 0.03891 0.05502 -0.01580 *

* Se 11 0.02536 0.09162 -0.04755 *

* Se 12 -0.04025 -0.05462 0.01530 *

* Se 13 0.02477 -0.05257 0.04303 *

* Se 14 -0.00345 0.01534 -0.04619 *

* Se 15 -0.02053 0.01214 0.08329 *

* Se 16 0.04427 -0.03778 -0.02209 *

* Se 17 0.02892 -0.05223 0.02878 *

* Se 18 -0.01233 -0.02008 -0.03653 *

* Se 19 -0.00337 -0.01079 0.02191 *

* Se 20 0.02744 -0.03766 -0.01228 *

* Nb 1 0.13686 0.05410 -0.01156 *

* Nb 2 -0.13934 -0.04851 0.01139 *

* Nb 3 -0.00127 -0.00194 0.00196 *

* Nb 4 -0.00108 -0.00172 -0.00202 *

* Nb 5 -0.09438 0.00137 -0.00187 *

* Nb 6 0.04299 0.06478 -0.01664 *

* Nb 7 -0.02900 0.00541 0.01255 *

* Nb 8 -0.00204 0.01186 0.00236 *

* Nb 9 0.01589 -0.03519 0.00564 *

* Nb 10 -0.04226 -0.00572 0.01446 *

* Nb 11 -0.00629 0.03229 -0.06273 *

* Nb 12 -0.05138 0.02339 0.04739 *

* Nb 13 0.03927 0.00550 -0.01448 *

* Nb 14 -0.01345 0.03895 -0.00628 *

* Nb 15 0.00564 -0.03315 0.06483 *

* Nb 16 0.05193 -0.02392 -0.04839 *

* Nb 17 -0.04115 -0.06844 0.01733 *

* Nb 18 0.09527 -0.00662 0.00225 *

* Nb 19 0.03087 -0.00245 -0.01645 *

* Nb 20 0.00254 -0.00943 0.00062 *

* *

******************************************************************************

***************** Stress Tensor *****************

* *

* Cartesian components (GPa) *

* --------------------------------------------- *

* x y z *

* *

* x -0.101849 0.024035 0.012068 *

* y 0.024035 0.140236 0.084253 *

* z 0.012068 0.084253 0.125467 *

* *

* Pressure: -0.0546 *

* *

*************************************************

+------------+-------------+-------------+-----------------+ <-- min BFGS

| Step | lambda | F.delta | enthalpy | <-- min BFGS

+------------+-------------+-------------+-----------------+ <-- min BFGS

| previous | 0.000000 | 0.000169 | -36259.812380 | <-- min BFGS

| trial step | 1.000000 | 0.000123 | -36259.816540 | <-- min BFGS

| line step | 3.670792 | -8.487E-006 | -36259.822369 | <-- min BFGS

+------------+-------------+-------------+-----------------+ <-- min BFGS

BFGS: finished iteration 16 with enthalpy= -3.62598224E+004 eV

+-----------+-----------------+-----------------+------------+-----+ <-- BFGS

| Parameter | value | tolerance | units | OK? | <-- BFGS

+-----------+-----------------+-----------------+------------+-----+ <-- BFGS

| dE/ion | 2.497272E-004 | 5.000000E-006 | eV | No | <-- BFGS

| |F|max | 1.479788E-001 | 1.000000E-002 | eV/A | No | <-- BFGS

| |dR|max | 1.667837E-003 | 5.000000E-004 | A | No | <-- BFGS

| Smax | 1.402359E-001 | 2.000000E-002 | GPa | No | <-- BFGS

+-----------+-----------------+-----------------+------------+-----+ <-- BFGS

================================================================================

Starting BFGS iteration 17 ...

================================================================================

+------------+-------------+-------------+-----------------+ <-- min BFGS

| Step | lambda | F.delta | enthalpy | <-- min BFGS

+------------+-------------+-------------+-----------------+ <-- min BFGS

| previous | 0.000000 | 0.000158 | -36259.822369 | <-- min BFGS

+------------+-------------+-------------+-----------------+ <-- min BFGS

--------------------------------------------------------------------------------

BFGS: starting iteration 17 with trial guess (lambda= 1.000000)

--------------------------------------------------------------------------------

-------------------------------

Unit Cell

-------------------------------

Real Lattice(A) Reciprocal Lattice(1/A)

14.8874334 -8.3386994 -0.0037590 0.4201235 -0.0034328 -0.0000098

0.0276433 3.3831674 0.0016793 1.0355041 1.8487296 -0.0007237

0.0003668 0.0052426 13.9172810 -0.0000115 -0.0002240 0.4514665

Lattice parameters(A) Cell Angles

a = 17.063692 alpha = 89.949966

b = 3.383281 beta = 90.021852

c = 13.917282 gamma = 118.785773

Current cell volume = 704.175170 A**3

-------------------------------

Cell Contents

-------------------------------

xxxxxxxxxxxxxxxxxxxxxxxxxxxxxxxxxxxxxxxxxxxxxxxxxxxxxxxxxxxx

x Element Atom Fractional coordinates of atoms x

x Number u v w x

x----------------------------------------------------------x

x Se 1 0.067031 0.664556 0.126719 x

x Se 2 0.132258 0.335697 0.626619 x

x Se 3 0.132289 0.336070 0.873242 x

x Se 4 0.067115 0.664808 0.373567 x

x Se 5 0.266840 0.665105 0.126424 x

x Se 6 0.331917 0.334394 0.626349 x

x Se 7 0.331975 0.334845 0.873437 x

x Se 8 0.266895 0.665225 0.373662 x

x Se 9 0.467654 0.663495 0.126827 x

x Se 10 0.532329 0.335535 0.626473 x

x Se 11 0.532345 0.336501 0.873176 x

x Se 12 0.467668 0.664462 0.373526 x

x Se 13 0.668028 0.665165 0.126556 x

x Se 14 0.733105 0.334769 0.626338 x

x Se 15 0.733159 0.334887 0.873576 x

x Se 16 0.668085 0.665613 0.373656 x

x Se 17 0.867708 0.663917 0.126766 x

x Se 18 0.932887 0.335204 0.626435 x

x Se 19 0.932971 0.335455 0.873277 x

x Se 20 0.867740 0.664292 0.373375 x

x Nb 1 -0.000600 -0.002659 0.250072 x

x Nb 2 0.000593 0.002703 0.749928 x

x Nb 3 -0.000001 -0.000028 0.000007 x

x Nb 4 -0.000000 -0.000022 0.499993 x

x Nb 5 0.198799 -0.002049 0.250117 x

x Nb 6 0.200814 0.004488 0.749862 x

x Nb 7 0.199962 0.000234 0.000255 x

x Nb 8 0.200011 0.000450 0.499796 x

x Nb 9 0.399936 -0.001705 0.250198 x

x Nb 10 0.400178 0.001730 0.749949 x

x Nb 11 0.399745 0.000777 0.000144 x

x Nb 12 0.399634 0.000380 0.499760 x

x Nb 13 0.599813 -0.001752 0.250052 x

x Nb 14 0.600067 0.001749 0.749800 x

x Nb 15 0.600253 -0.000799 -0.000138 x

x Nb 16 0.600366 -0.000393 0.500236 x

x Nb 17 0.799196 -0.004503 0.250139 x

x Nb 18 0.801205 0.002002 0.749884 x

x Nb 19 0.800041 -0.000184 -0.000267 x

x Nb 20 0.799990 -0.000412 0.500214 x

xxxxxxxxxxxxxxxxxxxxxxxxxxxxxxxxxxxxxxxxxxxxxxxxxxxxxxxxxxxx

------------------------------------------------------------------------ <-- SCF

SCF loop Energy Energy gain Timer <-- SCF

per atom (sec) <-- SCF

------------------------------------------------------------------------ <-- SCF

Initial -3.62597568E+004 13235.58 <-- SCF

1 -3.62599558E+004 4.97672511E-003 13262.44 <-- SCF

2 -3.62599659E+004 2.51571752E-004 13290.19 <-- SCF

3 -3.62599311E+004 -8.69861918E-004 13316.70 <-- SCF

4 -3.62598235E+004 -2.68951694E-003 13342.91 <-- SCF

5 -3.62598290E+004 1.37550617E-004 13369.38 <-- SCF

6 -3.62598263E+004 -6.81069605E-005 13394.20 <-- SCF

7 -3.62598255E+004 -1.95940458E-005 13415.53 <-- SCF

8 -3.62598255E+004 -3.23016081E-007 13435.00 <-- SCF

9 -3.62598256E+004 1.40640724E-006 13452.41 <-- SCF

------------------------------------------------------------------------ <-- SCF

Final energy = -36259.82557174 eV

(energy not corrected for finite basis set)

*********************************** Forces ***********************************

* *

* Cartesian components (eV/A) *

* -------------------------------------------------------------------------- *

* x y z *

* *

* Se 1 -0.00411 -0.00763 -0.02172 *

* Se 2 0.02729 0.03701 0.00215 *

* Se 3 0.03346 0.04863 -0.02762 *

* Se 4 -0.01057 -0.00415 0.02910 *

* Se 5 0.00455 0.00883 -0.02261 *

* Se 6 -0.00928 0.04327 0.00438 *

* Se 7 0.01408 0.05532 -0.04059 *

* Se 8 -0.02310 0.00256 -0.00487 *

* Se 9 -0.01633 -0.10281 0.05868 *

* Se 10 0.02565 0.06878 -0.02335 *

* Se 11 0.01531 0.10324 -0.05748 *

* Se 12 -0.02699 -0.06832 0.02291 *

* Se 13 -0.01173 -0.05481 0.03665 *

* Se 14 0.02286 -0.00333 0.00535 *

* Se 15 -0.00473 -0.00951 0.02251 *

* Se 16 0.01112 -0.04287 -0.00192 *

* Se 17 -0.03460 -0.04983 0.03053 *

* Se 18 0.01097 0.00423 -0.02842 *

* Se 19 0.00442 0.00810 0.02084 *

* Se 20 -0.02815 -0.03763 -0.00469 *

* Nb 1 0.18429 0.08560 -0.00859 *

* Nb 2 -0.18684 -0.07946 0.00863 *

* Nb 3 -0.00122 -0.00208 0.00205 *

* Nb 4 -0.00176 -0.00221 -0.00236 *

* Nb 5 -0.08007 -0.01662 -0.00611 *

* Nb 6 0.02523 0.06300 -0.01891 *

* Nb 7 -0.03953 0.00574 -0.00087 *

* Nb 8 -0.00405 0.01289 0.01759 *

* Nb 9 -0.00666 -0.04755 0.00188 *

* Nb 10 -0.01839 -0.01992 0.00525 *

* Nb 11 0.00641 0.03092 -0.08962 *

* Nb 12 -0.03721 0.02515 0.07991 *

* Nb 13 0.01536 0.01923 -0.00557 *

* Nb 14 0.00938 0.05130 -0.00245 *

* Nb 15 -0.00726 -0.03166 0.09154 *

* Nb 16 0.03832 -0.02517 -0.08046 *

* Nb 17 -0.02388 -0.06695 0.01972 *

* Nb 18 0.08138 0.01163 0.00623 *

* Nb 19 0.04173 -0.00264 -0.00310 *

* Nb 20 0.00466 -0.01029 -0.01458 *

* *

******************************************************************************

***************** Stress Tensor *****************

* *

* Cartesian components (GPa) *

* --------------------------------------------- *

* x y z *

* *

* x -0.054244 0.094096 0.006657 *

* y 0.094096 0.022964 0.085377 *

* z 0.006657 0.085377 0.146617 *

* *

* Pressure: -0.0384 *

* *

*************************************************

+------------+-------------+-------------+-----------------+ <-- min BFGS

| Step | lambda | F.delta | enthalpy | <-- min BFGS

+------------+-------------+-------------+-----------------+ <-- min BFGS

| previous | 0.000000 | 0.000158 | -36259.822369 | <-- min BFGS

| trial step | 1.000000 | 0.000040 | -36259.825632 | <-- min BFGS

+------------+-------------+-------------+-----------------+ <-- min BFGS

BFGS: finished iteration 17 with enthalpy= -3.62598256E+004 eV

+-----------+-----------------+-----------------+------------+-----+ <-- BFGS

| Parameter | value | tolerance | units | OK? | <-- BFGS

+-----------+-----------------+-----------------+------------+-----+ <-- BFGS

| dE/ion | 8.156086E-005 | 5.000000E-006 | eV | No | <-- BFGS

| |F|max | 2.033801E-001 | 1.000000E-002 | eV/A | No | <-- BFGS

| |dR|max | 3.653155E-003 | 5.000000E-004 | A | No | <-- BFGS

| Smax | 1.466173E-001 | 2.000000E-002 | GPa | No | <-- BFGS

+-----------+-----------------+-----------------+------------+-----+ <-- BFGS

================================================================================

Starting BFGS iteration 18 ...

================================================================================

+------------+-------------+-------------+-----------------+ <-- min BFGS

| Step | lambda | F.delta | enthalpy | <-- min BFGS

+------------+-------------+-------------+-----------------+ <-- min BFGS

| previous | 0.000000 | 0.000076 | -36259.825632 | <-- min BFGS

+------------+-------------+-------------+-----------------+ <-- min BFGS

--------------------------------------------------------------------------------

BFGS: starting iteration 18 with trial guess (lambda= 1.000000)

--------------------------------------------------------------------------------

-------------------------------

Unit Cell

-------------------------------

Real Lattice(A) Reciprocal Lattice(1/A)

14.8997633 -8.3407298 -0.0033090 0.4197479 -0.0034817 -0.0000052

0.0280758 3.3847374 0.0014191 1.0343503 1.8477493 -0.0006005

0.0002092 0.0043993 13.8975110 -0.0000057 -0.0001895 0.4521087

Lattice parameters(A) Cell Angles

a = 17.075442 alpha = 89.957835

b = 3.384854 beta = 90.019210

c = 13.897512 gamma = 118.764395

Current cell volume = 704.130621 A**3

-------------------------------

Cell Contents

-------------------------------

xxxxxxxxxxxxxxxxxxxxxxxxxxxxxxxxxxxxxxxxxxxxxxxxxxxxxxxxxxxx

x Element Atom Fractional coordinates of atoms x

x Number u v w x

x----------------------------------------------------------x

x Se 1 0.067072 0.664712 0.126783 x

x Se 2 0.132144 0.335572 0.626732 x

x Se 3 0.132178 0.336025 0.873127 x

x Se 4 0.067175 0.665035 0.373509 x

x Se 5 0.266876 0.664949 0.126383 x

x Se 6 0.331801 0.334243 0.626485 x

x Se 7 0.331872 0.334782 0.873289 x

x Se 8 0.266944 0.665093 0.373679 x

x Se 9 0.467634 0.663120 0.126928 x

x Se 10 0.532366 0.335814 0.626547 x

x Se 11 0.532365 0.336875 0.873076 x

x Se 12 0.467630 0.664183 0.373451 x

x Se 13 0.668133 0.665230 0.126702 x

x Se 14 0.733056 0.334899 0.626321 x

x Se 15 0.733123 0.335041 0.873617 x

x Se 16 0.668202 0.665766 0.373521 x

x Se 17 0.867819 0.663959 0.126883 x

x Se 18 0.932827 0.334978 0.626493 x

x Se 19 0.932931 0.335301 0.873212 x

x Se 20 0.867853 0.664415 0.373260 x

x Nb 1 -0.000615 -0.002746 0.250064 x

x Nb 2 0.000607 0.002797 0.749935 x

x Nb 3 -0.000002 -0.000033 0.000008 x

x Nb 4 -0.000001 -0.000027 0.499992 x

x Nb 5 0.198683 -0.002218 0.250116 x

x Nb 6 0.200882 0.004887 0.749856 x

x Nb 7 0.199951 0.000246 0.000282 x

x Nb 8 0.200012 0.000506 0.499780 x

x Nb 9 0.399945 -0.001804 0.250209 x

x Nb 10 0.400158 0.001813 0.749959 x

x Nb 11 0.399726 0.000866 0.000142 x

x Nb 12 0.399593 0.000397 0.499746 x

x Nb 13 0.599832 -0.001839 0.250041 x

x Nb 14 0.600059 0.001858 0.749789 x

x Nb 15 0.600271 -0.000891 -0.000136 x

x Nb 16 0.600407 -0.000411 0.500249 x

x Nb 17 0.799128 -0.004908 0.250146 x

x Nb 18 0.801322 0.002163 0.749885 x

x Nb 19 0.800053 -0.000188 -0.000296 x

x Nb 20 0.799989 -0.000463 0.500232 x

xxxxxxxxxxxxxxxxxxxxxxxxxxxxxxxxxxxxxxxxxxxxxxxxxxxxxxxxxxxx

------------------------------------------------------------------------ <-- SCF

SCF loop Energy Energy gain Timer <-- SCF

per atom (sec) <-- SCF

------------------------------------------------------------------------ <-- SCF

Initial -3.62597739E+004 13555.48 <-- SCF

1 -3.62598998E+004 3.14845732E-003 13582.50 <-- SCF

2 -3.62599068E+004 1.72732871E-004 13610.53 <-- SCF

3 -3.62598837E+004 -5.76789430E-004 13637.06 <-- SCF

4 -3.62598251E+004 -1.46539898E-003 13662.66 <-- SCF

5 -3.62598285E+004 8.68005999E-005 13688.61 <-- SCF

6 -3.62598274E+004 -2.78302765E-005 13712.38 <-- SCF

7 -3.62598272E+004 -5.26544617E-006 13732.92 <-- SCF

8 -3.62598274E+004 3.91223592E-006 13751.50 <-- SCF

9 -3.62598275E+004 4.31488514E-006 13769.14 <-- SCF

10 -3.62598277E+004 3.87357271E-006 13786.03 <-- SCF

11 -3.62598278E+004 3.54499809E-006 13803.06 <-- SCF

12 -3.62598280E+004 3.16555936E-006 13819.20 <-- SCF

13 -3.62598281E+004 3.10245597E-006 13835.34 <-- SCF

14 -3.62598282E+004 2.48088317E-006 13851.41 <-- SCF

15 -3.62598283E+004 2.54163513E-006 13867.56 <-- SCF

16 -3.62598284E+004 2.35328691E-006 13884.06 <-- SCF

17 -3.62598285E+004 2.23273426E-006 13900.22 <-- SCF

18 -3.62598286E+004 2.05530111E-006 13916.56 <-- SCF

19 -3.62598286E+004 1.92892249E-006 13932.72 <-- SCF

20 -3.62598287E+004 1.79457929E-006 13948.86 <-- SCF

21 -3.62598288E+004 1.68302075E-006 13964.83 <-- SCF

22 -3.62598288E+004 1.56238814E-006 13980.95 <-- SCF

23 -3.62598289E+004 1.47157249E-006 13997.02 <-- SCF

24 -3.62598289E+004 1.38164996E-006 14013.16 <-- SCF

25 -3.62598290E+004 1.29813686E-006 14029.31 <-- SCF

26 -3.62598291E+004 1.21734734E-006 14045.48 <-- SCF

27 -3.62598291E+004 1.13806609E-006 14061.56 <-- SCF

28 -3.62598291E+004 1.13326053E-006 14077.70 <-- SCF

29 -3.62598292E+004 8.11540970E-007 14093.84 <-- SCF

------------------------------------------------------------------------ <-- SCF

Final energy = -36259.82917383 eV

(energy not corrected for finite basis set)

*********************************** Forces ***********************************

* *

* Cartesian components (eV/A) *

* -------------------------------------------------------------------------- *

* x y z *

* *

* Se 1 -0.01466 -0.01863 -0.03790 *

* Se 2 0.06677 0.05209 -0.01018 *

* Se 3 0.07663 0.06403 -0.02384 *

* Se 4 -0.02975 -0.01403 0.04766 *

* Se 5 -0.00666 0.02184 -0.01361 *

* Se 6 0.02100 0.04344 -0.00081 *

* Se 7 0.04765 0.04964 -0.03819 *

* Se 8 -0.03910 0.01460 -0.00484 *

* Se 9 -0.00544 -0.11563 0.06061 *

* Se 10 0.00751 0.08305 -0.03046 *

* Se 11 0.00461 0.11615 -0.05987 *

* Se 12 -0.00887 -0.08266 0.03043 *

* Se 13 -0.04540 -0.04906 0.03457 *

* Se 14 0.03851 -0.01549 0.00543 *

* Se 15 0.00612 -0.02264 0.01352 *

* Se 16 -0.01934 -0.04270 0.00315 *

* Se 17 -0.07742 -0.06540 0.02650 *

* Se 18 0.03020 0.01402 -0.04717 *

* Se 19 0.01486 0.01909 0.03751 *

* Se 20 -0.06711 -0.05291 0.00760 *

* Nb 1 0.20082 0.09230 -0.00599 *

* Nb 2 -0.20323 -0.08732 0.00617 *

* Nb 3 -0.00107 -0.00193 0.00147 *

* Nb 4 -0.00202 -0.00191 -0.00210 *

* Nb 5 -0.04627 -0.01895 -0.00880 *

* Nb 6 0.00127 0.06017 -0.01412 *

* Nb 7 -0.03699 0.00941 -0.00705 *

* Nb 8 0.00059 0.01573 0.02269 *

* Nb 9 -0.01202 -0.05477 -0.00380 *

* Nb 10 -0.01146 -0.02254 -0.00117 *

* Nb 11 0.01109 0.02982 -0.08596 *

* Nb 12 -0.02836 0.02531 0.08549 *

* Nb 13 0.00890 0.02169 0.00059 *

* Nb 14 0.01516 0.05797 0.00325 *

* Nb 15 -0.01207 -0.03021 0.08787 *

* Nb 16 0.02986 -0.02499 -0.08560 *

* Nb 17 -0.00098 -0.06336 0.01493 *

* Nb 18 0.04764 0.01517 0.00885 *

* Nb 19 0.03917 -0.00674 0.00358 *

* Nb 20 -0.00015 -0.01366 -0.02038 *

* *

******************************************************************************

***************** Stress Tensor *****************

* *

* Cartesian components (GPa) *

* --------------------------------------------- *

* x y z *

* *

* x -0.019353 0.082999 0.011663 *

* y 0.082999 0.017116 0.063088 *

* z 0.011663 0.063088 -0.026713 *

* *

* Pressure: 0.0097 *

* *

*************************************************

+------------+-------------+-------------+-----------------+ <-- min BFGS

| Step | lambda | F.delta | enthalpy | <-- min BFGS

+------------+-------------+-------------+-----------------+ <-- min BFGS

| previous | 0.000000 | 0.000076 | -36259.825632 | <-- min BFGS

| trial step | 1.000000 | -2.439E-006 | -36259.829229 | <-- min BFGS

+------------+-------------+-------------+-----------------+ <-- min BFGS

BFGS: finished iteration 18 with enthalpy= -3.62598292E+004 eV

+-----------+-----------------+-----------------+------------+-----+ <-- BFGS

| Parameter | value | tolerance | units | OK? | <-- BFGS

+-----------+-----------------+-----------------+------------+-----+ <-- BFGS

| dE/ion | 8.992521E-005 | 5.000000E-006 | eV | No | <-- BFGS

| |F|max | 2.212806E-001 | 1.000000E-002 | eV/A | No | <-- BFGS

| |dR|max | 2.651039E-003 | 5.000000E-004 | A | No | <-- BFGS

| Smax | 8.299918E-002 | 2.000000E-002 | GPa | No | <-- BFGS

+-----------+-----------------+-----------------+------------+-----+ <-- BFGS

================================================================================

Starting BFGS iteration 19 ...

================================================================================

+------------+-------------+-------------+-----------------+ <-- min BFGS

| Step | lambda | F.delta | enthalpy | <-- min BFGS

+------------+-------------+-------------+-----------------+ <-- min BFGS

| previous | 0.000000 | 0.000022 | -36259.829229 | <-- min BFGS

+------------+-------------+-------------+-----------------+ <-- min BFGS

--------------------------------------------------------------------------------

BFGS: starting iteration 19 with trial guess (lambda= 1.000000)

--------------------------------------------------------------------------------

-------------------------------

Unit Cell

-------------------------------

Real Lattice(A) Reciprocal Lattice(1/A)

14.9010214 -8.3435475 -0.0027667 0.4197430 -0.0034261 -0.0000017

0.0276309 3.3851071 0.0011409 1.0345745 1.8476815 -0.0004714

0.0000851 0.0034978 13.8953936 -0.0000014 -0.0001524 0.4521776

Lattice parameters(A) Cell Angles

a = 17.077916 alpha = 89.966265

b = 3.385220 beta = 90.016022

c = 13.895394 gamma = 118.778163

Current cell volume = 704.108616 A**3

-------------------------------

Cell Contents

-------------------------------

xxxxxxxxxxxxxxxxxxxxxxxxxxxxxxxxxxxxxxxxxxxxxxxxxxxxxxxxxxxx

x Element Atom Fractional coordinates of atoms x

x Number u v w x

x----------------------------------------------------------x

x Se 1 0.067063 0.664653 0.126783 x

x Se 2 0.132172 0.335652 0.626727 x

x Se 3 0.132206 0.336097 0.873130 x

x Se 4 0.067161 0.664960 0.373508 x

x Se 5 0.266869 0.664985 0.126407 x

x Se 6 0.331823 0.334309 0.626474 x

x Se 7 0.331894 0.334843 0.873299 x

x Se 8 0.266930 0.665111 0.373654 x

x Se 9 0.467639 0.663125 0.126935 x

x Se 10 0.532357 0.335809 0.626547 x

x Se 11 0.532359 0.336871 0.873070 x

x Se 12 0.467640 0.664188 0.373452 x

x Se 13 0.668110 0.665169 0.126692 x

x Se 14 0.733070 0.334881 0.626347 x

x Se 15 0.733130 0.335005 0.873593 x

x Se 16 0.668180 0.665700 0.373532 x

x Se 17 0.867791 0.663886 0.126880 x

x Se 18 0.932841 0.335053 0.626495 x

x Se 19 0.932940 0.335361 0.873212 x

x Se 20 0.867826 0.664335 0.373265 x

x Nb 1 -0.000590 -0.002630 0.250065 x

x Nb 2 0.000582 0.002681 0.749934 x

x Nb 3 -0.000002 -0.000034 0.000008 x

x Nb 4 -0.000001 -0.000027 0.499992 x

x Nb 5 0.198696 -0.002219 0.250116 x

x Nb 6 0.200872 0.004855 0.749854 x

x Nb 7 0.199949 0.000235 0.000276 x

x Nb 8 0.200012 0.000502 0.499786 x

x Nb 9 0.399941 -0.001821 0.250207 x

x Nb 10 0.400161 0.001784 0.749957 x

x Nb 11 0.399730 0.000870 0.000129 x

x Nb 12 0.399596 0.000399 0.499761 x

x Nb 13 0.599829 -0.001810 0.250043 x

x Nb 14 0.600063 0.001875 0.749791 x

x Nb 15 0.600267 -0.000895 -0.000122 x

x Nb 16 0.600404 -0.000412 0.500234 x

x Nb 17 0.799138 -0.004876 0.250148 x

x Nb 18 0.801309 0.002163 0.749886 x

x Nb 19 0.800056 -0.000177 -0.000291 x

x Nb 20 0.799990 -0.000458 0.500227 x

xxxxxxxxxxxxxxxxxxxxxxxxxxxxxxxxxxxxxxxxxxxxxxxxxxxxxxxxxxxx

------------------------------------------------------------------------ <-- SCF

SCF loop Energy Energy gain Timer <-- SCF

per atom (sec) <-- SCF

------------------------------------------------------------------------ <-- SCF

Initial -3.62598273E+004 14196.34 <-- SCF

1 -3.62598396E+004 3.08976433E-004 14224.02 <-- SCF

2 -3.62598404E+004 1.92299417E-005 14246.50 <-- SCF

3 -3.62598395E+004 -2.40366945E-005 14272.70 <-- SCF

4 -3.62598296E+004 -2.45555236E-004 14298.45 <-- SCF

5 -3.62598300E+004 8.00593948E-006 14319.61 <-- SCF

6 -3.62598299E+004 -5.32277803E-007 14337.06 <-- SCF

7 -3.62598299E+004 2.05261264E-007 14353.81 <-- SCF

------------------------------------------------------------------------ <-- SCF

Final energy = -36259.82994056 eV

(energy not corrected for finite basis set)

*********************************** Forces ***********************************

* *

* Cartesian components (eV/A) *

* -------------------------------------------------------------------------- *

* x y z *

* *

* Se 1 -0.00815 -0.01454 -0.03671 *

* Se 2 0.05768 0.05108 -0.00437 *

* Se 3 0.06958 0.06464 -0.03039 *

* Se 4 -0.02016 -0.01045 0.04492 *

* Se 5 -0.00345 0.01926 -0.00885 *

* Se 6 0.02060 0.04415 0.00647 *

* Se 7 0.04355 0.05107 -0.04722 *

* Se 8 -0.03584 0.01313 -0.00733 *

* Se 9 -0.00488 -0.11433 0.06369 *

* Se 10 0.00667 0.08131 -0.02278 *

* Se 11 0.00432 0.11494 -0.06331 *

* Se 12 -0.00780 -0.08093 0.02306 *

* Se 13 -0.04140 -0.05039 0.04390 *

* Se 14 0.03537 -0.01401 0.00779 *

* Se 15 0.00285 -0.02008 0.00878 *

* Se 16 -0.01903 -0.04326 -0.00448 *

* Se 17 -0.07048 -0.06617 0.03291 *

* Se 18 0.02047 0.01047 -0.04437 *

* Se 19 0.00837 0.01508 0.03653 *

* Se 20 -0.05811 -0.05205 0.00200 *

* Nb 1 0.17539 0.08405 -0.00324 *

* Nb 2 -0.17818 -0.07982 0.00348 *

* Nb 3 -0.00070 -0.00162 0.00125 *

* Nb 4 -0.00213 -0.00190 -0.00214 *

* Nb 5 -0.03065 -0.02096 -0.00835 *

* Nb 6 -0.01094 0.05714 -0.01070 *

* Nb 7 -0.03398 0.00823 -0.01319 *

* Nb 8 0.00303 0.01627 0.02604 *

* Nb 9 -0.02105 -0.06530 -0.00571 *

* Nb 10 0.00566 -0.01690 -0.00669 *

* Nb 11 0.00764 0.03092 -0.08643 *

* Nb 12 -0.01848 0.03162 0.09503 *

* Nb 13 -0.00794 0.01568 0.00605 *

* Nb 14 0.02450 0.06790 0.00523 *

* Nb 15 -0.00855 -0.03127 0.08805 *

* Nb 16 0.02049 -0.03088 -0.09479 *

* Nb 17 0.01109 -0.05977 0.01163 *

* Nb 18 0.03200 0.01833 0.00821 *

* Nb 19 0.03568 -0.00596 0.01024 *

* Nb 20 -0.00302 -0.01469 -0.02423 *

* *

******************************************************************************

***************** Stress Tensor *****************

* *

* Cartesian components (GPa) *

* --------------------------------------------- *

* x y z *

* *

* x -0.083542 0.082349 0.004381 *

* y 0.082349 -0.031258 0.050170 *

* z 0.004381 0.050170 0.053557 *

* *

* Pressure: 0.0204 *

* *

*************************************************

+------------+-------------+-------------+-----------------+ <-- min BFGS

| Step | lambda | F.delta | enthalpy | <-- min BFGS

+------------+-------------+-------------+-----------------+ <-- min BFGS

| previous | 0.000000 | 0.000022 | -36259.829229 | <-- min BFGS

| trial step | 1.000000 | 0.000023 | -36259.829972 | <-- min BFGS

+------------+-------------+-------------+-----------------+ <-- min BFGS

--------------------------------------------------------------------------------

BFGS: improving iteration 19 with line minimization (lambda=-15.574494)

--------------------------------------------------------------------------------

-------------------------------

Unit Cell

-------------------------------

Real Lattice(A) Reciprocal Lattice(1/A)

14.8801689 -8.2968460 -0.0117548 0.4198272 -0.0043492 -0.0000588

0.0350053 3.3789791 0.0057524 1.0308567 1.8488172 -0.0026059

0.0021427 0.0184400 13.9304884 -0.0000714 -0.0007671 0.4510394

Lattice parameters(A) Cell Angles

a = 17.036937 alpha = 89.826534

b = 3.379165 beta = 90.068769

c = 13.930501 gamma = 118.549527

Current cell volume = 704.466174 A**3

-------------------------------

Cell Contents

-------------------------------

xxxxxxxxxxxxxxxxxxxxxxxxxxxxxxxxxxxxxxxxxxxxxxxxxxxxxxxxxxxx

x Element Atom Fractional coordinates of atoms x

x Number u v w x

x----------------------------------------------------------x

x Se 1 0.067211 0.665642 0.126778 x

x Se 2 0.131714 0.334326 0.626810 x

x Se 3 0.131736 0.334896 0.873080 x

x Se 4 0.067397 0.666202 0.373533 x

x Se 5 0.266983 0.664390 0.126001 x

x Se 6 0.331466 0.333209 0.626663 x

x Se 7 0.331524 0.333821 0.873132 x

x Se 8 0.267152 0.664822 0.374075 x

x Se 9 0.467545 0.663045 0.126818 x

x Se 10 0.532512 0.335889 0.626552 x

x Se 11 0.532455 0.336949 0.873185 x

x Se 12 0.467486 0.664110 0.373445 x

x Se 13 0.668478 0.666182 0.126863 x

x Se 14 0.732849 0.335177 0.625925 x

x Se 15 0.733016 0.335605 0.873998 x

x Se 16 0.668536 0.666791 0.373340 x

x Se 17 0.868261 0.665096 0.126927 x

x Se 18 0.932605 0.333812 0.626469 x

x Se 19 0.932793 0.334372 0.873217 x

x Se 20 0.868282 0.665665 0.373185 x

x Nb 1 -0.001003 -0.004562 0.250052 x

x Nb 2 0.000995 0.004601 0.749946 x

x Nb 3 -0.000001 -0.000026 0.000007 x

x Nb 4 0.000002 -0.000015 0.499994 x

x Nb 5 0.198486 -0.002212 0.250125 x

x Nb 6 0.201037 0.005381 0.749886 x

x Nb 7 0.199986 0.000413 0.000368 x

x Nb 8 0.200015 0.000582 0.499686 x

x Nb 9 0.400000 -0.001548 0.250235 x

x Nb 10 0.400104 0.002261 0.749994 x

x Nb 11 0.399664 0.000808 0.000351 x

x Nb 12 0.399544 0.000366 0.499503 x

x Nb 13 0.599887 -0.002277 0.250008 x

x Nb 14 0.600001 0.001588 0.749764 x

x Nb 15 0.600334 -0.000830 -0.000346 x

x Nb 16 0.600454 -0.000389 0.500491 x

x Nb 17 0.798974 -0.005394 0.250114 x

x Nb 18 0.801518 0.002163 0.749877 x

x Nb 19 0.800017 -0.000366 -0.000379 x

x Nb 20 0.799986 -0.000544 0.500324 x

xxxxxxxxxxxxxxxxxxxxxxxxxxxxxxxxxxxxxxxxxxxxxxxxxxxxxxxxxxxx

------------------------------------------------------------------------ <-- SCF

SCF loop Energy Energy gain Timer <-- SCF

per atom (sec) <-- SCF

------------------------------------------------------------------------ <-- SCF

Initial -3.62592909E+004 14456.64 <-- SCF

1 -3.62606063E+004 3.28836881E-002 14483.64 <-- SCF

2 -3.62606676E+004 1.53261162E-003 14512.81 <-- SCF

3 -3.62604014E+004 -6.65568169E-003 14539.69 <-- SCF

4 -3.62598013E+004 -1.50008702E-002 14565.95 <-- SCF

5 -3.62598240E+004 5.67944121E-004 14592.72 <-- SCF

6 -3.62598100E+004 -3.49859762E-004 14619.08 <-- SCF

7 -3.62598056E+004 -1.11177227E-004 14643.02 <-- SCF

8 -3.62598057E+004 1.63250637E-006 14665.28 <-- SCF

9 -3.62598059E+004 5.77064204E-006 14684.89 <-- SCF

10 -3.62598060E+004 2.53663730E-006 14702.78 <-- SCF

11 -3.62598060E+004 1.10840767E-006 14720.58 <-- SCF

12 -3.62598061E+004 1.61829324E-006 14738.73 <-- SCF

13 -3.62598062E+004 1.24323501E-006 14755.58 <-- SCF

14 -3.62598062E+004 1.04119555E-006 14772.58 <-- SCF

15 -3.62598062E+004 8.98792661E-007 14788.72 <-- SCF

------------------------------------------------------------------------ <-- SCF

Final energy = -36259.80623626 eV

(energy not corrected for finite basis set)

*********************************** Forces ***********************************

* *

* Cartesian components (eV/A) *

* -------------------------------------------------------------------------- *

* x y z *

* *

* Se 1 -0.06097 -0.09968 -0.03485 *

* Se 2 0.14489 0.09349 -0.05536 *

* Se 3 0.16671 0.09146 0.01931 *

* Se 4 -0.11209 -0.08731 0.02187 *

* Se 5 -0.02366 0.00614 0.04327 *

* Se 6 0.07480 0.07034 -0.02752 *

* Se 7 0.10331 0.05804 -0.01279 *

* Se 8 -0.05918 -0.00233 -0.04322 *

* Se 9 0.02307 -0.13292 0.05233 *

* Se 10 -0.03982 0.11004 -0.04287 *

* Se 11 -0.02357 0.13308 -0.05213 *

* Se 12 0.03889 -0.10987 0.04329 *

* Se 13 -0.10129 -0.05751 0.01063 *

* Se 14 0.05816 0.00082 0.04345 *

* Se 15 0.02302 -0.00742 -0.04286 *

* Se 16 -0.07341 -0.06946 0.02896 *

* Se 17 -0.16763 -0.09299 -0.01751 *

* Se 18 0.11246 0.08768 -0.02165 *

* Se 19 0.06068 0.10058 0.03487 *

* Se 20 -0.14485 -0.09412 0.05362 *

* Nb 1 0.27097 0.16924 0.00199 *

* Nb 2 -0.27454 -0.16252 -0.00199 *

* Nb 3 -0.00007 -0.00373 0.00186 *

* Nb 4 -0.00138 -0.00385 -0.00236 *

* Nb 5 0.02693 -0.02265 -0.00415 *

* Nb 6 -0.08283 0.02416 -0.01591 *

* Nb 7 -0.04681 0.00396 -0.03665 *

* Nb 8 -0.01120 0.00748 0.05134 *

* Nb 9 -0.06623 -0.03520 -0.01588 *

* Nb 10 0.01138 -0.07850 -0.01046 *

* Nb 11 -0.00013 0.03599 -0.12749 *

* Nb 12 -0.01687 0.03545 0.14196 *

* Nb 13 -0.01438 0.07795 0.00989 *

* Nb 14 0.06910 0.03836 0.01513 *

* Nb 15 -0.00001 -0.03718 0.12950 *

* Nb 16 0.01929 -0.03567 -0.14246 *

* Nb 17 0.08398 -0.02869 0.01680 *

* Nb 18 -0.02419 0.01832 0.00418 *

* Nb 19 0.04724 0.00169 0.03280 *

* Nb 20 0.01024 -0.00268 -0.04892 *

* *

******************************************************************************

***************** Stress Tensor *****************

* *

* Cartesian components (GPa) *

* --------------------------------------------- *

* x y z *

* *

* x -0.173049 0.425019 0.016464 *

* y 0.425019 -0.052217 0.333857 *

* z 0.016464 0.333857 0.474077 *

* *

* Pressure: -0.0829 *

* *

*************************************************

+------------+-------------+-------------+-----------------+ <-- min BFGS

| Step | lambda | F.delta | enthalpy | <-- min BFGS

+------------+-------------+-------------+-----------------+ <-- min BFGS

| previous | 0.000000 | 0.000022 | -36259.829229 | <-- min BFGS

| trial step | 1.000000 | 0.000023 | -36259.829972 | <-- min BFGS

| line step | -15.574494 | 0.000080 | -36259.806425 | <-- min BFGS

+------------+-------------+-------------+-----------------+ <-- min BFGS

--------------------------------------------------------------------------------

BFGS: improving iteration 19 with quad minimization (lambda= 6.884290)

--------------------------------------------------------------------------------

-------------------------------

Unit Cell

-------------------------------

Real Lattice(A) Reciprocal Lattice(1/A)

14.9084245 -8.3601275 0.0004243 0.4197140 -0.0030993 0.0000191

0.0250128 3.3872826 -0.0004963 1.0358931 1.8472845 0.0002886

-0.0006454 -0.0018069 13.8829342 0.0000242 0.0000661 0.4525834

Lattice parameters(A) Cell Angles

a = 17.092479 alpha = 90.015872

b = 3.387375 beta = 89.997254

c = 13.882934 gamma = 118.859113

Current cell volume = 703.978005 A**3

-------------------------------

Cell Contents

-------------------------------

xxxxxxxxxxxxxxxxxxxxxxxxxxxxxxxxxxxxxxxxxxxxxxxxxxxxxxxxxxxx

x Element Atom Fractional coordinates of atoms x

x Number u v w x

x----------------------------------------------------------x

x Se 1 0.067011 0.664301 0.126785 x

x Se 2 0.132334 0.336123 0.626697 x

x Se 3 0.132373 0.336524 0.873147 x

x Se 4 0.067077 0.664519 0.373499 x

x Se 5 0.266828 0.665197 0.126552 x

x Se 6 0.331950 0.334700 0.626407 x

x Se 7 0.332025 0.335206 0.873359 x

x Se 8 0.266851 0.665213 0.373505 x

x Se 9 0.467673 0.663154 0.126976 x

x Se 10 0.532302 0.335781 0.626545 x

x Se 11 0.532325 0.336843 0.873028 x

x Se 12 0.467694 0.664216 0.373454 x

x Se 13 0.667980 0.664810 0.126631 x

x Se 14 0.733148 0.334777 0.626497 x

x Se 15 0.733170 0.334792 0.873448 x

x Se 16 0.668054 0.665312 0.373600 x

x Se 17 0.867624 0.663457 0.126863 x

x Se 18 0.932925 0.335494 0.626504 x

x Se 19 0.932992 0.335712 0.873210 x

x Se 20 0.867663 0.663863 0.373294 x

x Nb 1 -0.000444 -0.001944 0.250070 x

x Nb 2 0.000435 0.002000 0.749930 x

x Nb 3 -0.000002 -0.000036 0.000009 x

x Nb 4 -0.000002 -0.000032 0.499991 x

x Nb 5 0.198771 -0.002221 0.250113 x

x Nb 6 0.200813 0.004668 0.749842 x

x Nb 7 0.199936 0.000172 0.000244 x

x Nb 8 0.200010 0.000473 0.499821 x

x Nb 9 0.399920 -0.001918 0.250197 x

x Nb 10 0.400181 0.001615 0.749944 x

x Nb 11 0.399753 0.000892 0.000050 x

x Nb 12 0.399615 0.000410 0.499853 x

x Nb 13 0.599808 -0.001645 0.250056 x

x Nb 14 0.600085 0.001977 0.749800 x

x Nb 15 0.600244 -0.000918 -0.000043 x

x Nb 16 0.600386 -0.000420 0.500142 x

x Nb 17 0.799197 -0.004693 0.250160 x

x Nb 18 0.801235 0.002164 0.749889 x

x Nb 19 0.800069 -0.000110 -0.000260 x

x Nb 20 0.799991 -0.000427 0.500192 x

xxxxxxxxxxxxxxxxxxxxxxxxxxxxxxxxxxxxxxxxxxxxxxxxxxxxxxxxxxxx

------------------------------------------------------------------------ <-- SCF

SCF loop Energy Energy gain Timer <-- SCF

per atom (sec) <-- SCF

------------------------------------------------------------------------ <-- SCF

Initial -3.62588945E+004 14891.97 <-- SCF

1 -3.62610350E+004 5.35135802E-002 14918.70 <-- SCF

2 -3.62611329E+004 2.44862002E-003 14947.44 <-- SCF

3 -3.62606596E+004 -1.18324735E-002 14974.16 <-- SCF

4 -3.62598285E+004 -2.07788016E-002 15000.47 <-- SCF

5 -3.62598616E+004 8.26502113E-004 15026.83 <-- SCF

6 -3.62598379E+004 -5.92013050E-004 15052.73 <-- SCF

7 -3.62598309E+004 -1.75219018E-004 15076.64 <-- SCF

8 -3.62598307E+004 -4.11080980E-006 15099.83 <-- SCF

9 -3.62598309E+004 6.06331647E-006 15120.11 <-- SCF

10 -3.62598312E+004 5.21396117E-006 15138.23 <-- SCF

11 -3.62598313E+004 3.11487374E-006 15155.55 <-- SCF

12 -3.62598314E+004 3.00206106E-006 15173.72 <-- SCF

13 -3.62598315E+004 2.81156235E-006 15190.84 <-- SCF

14 -3.62598316E+004 2.71170743E-006 15207.88 <-- SCF

15 -3.62598317E+004 2.50103225E-006 15224.12 <-- SCF

16 -3.62598318E+004 2.54305400E-006 15240.06 <-- SCF

17 -3.62598319E+004 2.55390642E-006 15256.02 <-- SCF

18 -3.62598320E+004 2.88300710E-006 15272.22 <-- SCF

19 -3.62598321E+004 1.41964434E-006 15288.27 <-- SCF

20 -3.62598321E+004 5.01831598E-007 15304.41 <-- SCF

------------------------------------------------------------------------ <-- SCF

Final energy = -36259.83211459 eV

(energy not corrected for finite basis set)

*********************************** Forces ***********************************

* *

* Cartesian components (eV/A) *

* -------------------------------------------------------------------------- *

* x y z *

* *

* Se 1 0.00134 0.01023 -0.03092 *

* Se 2 0.00510 0.04382 0.01277 *

* Se 3 0.01357 0.06427 -0.04828 *

* Se 4 0.00847 0.01513 0.05281 *

* Se 5 0.00097 0.00926 -0.03695 *

* Se 6 -0.00537 0.03316 0.02761 *

* Se 7 0.01988 0.04762 -0.06466 *

* Se 8 -0.01875 0.00590 0.02255 *

* Se 9 -0.01221 -0.10835 0.06629 *

* Se 10 0.02280 0.07109 -0.01826 *

* Se 11 0.01410 0.10889 -0.06641 *

* Se 12 -0.02127 -0.07050 0.01891 *

* Se 13 -0.01949 -0.04627 0.06074 *

* Se 14 0.01592 -0.00681 -0.02316 *

* Se 15 -0.00390 -0.00993 0.03777 *

* Se 16 0.00544 -0.03184 -0.02558 *

* Se 17 -0.01449 -0.06617 0.05153 *

* Se 18 -0.00628 -0.01436 -0.05129 *

* Se 19 0.00071 -0.00901 0.02958 *

* Se 20 -0.00582 -0.04525 -0.01524 *

* Nb 1 0.11093 0.04495 -0.00284 *

* Nb 2 -0.11778 -0.03926 0.00249 *

* Nb 3 0.00014 -0.00376 0.00224 *

* Nb 4 -0.00097 -0.00380 -0.00294 *

* Nb 5 -0.04353 -0.01661 -0.00395 *

* Nb 6 0.00712 0.06252 -0.01763 *

* Nb 7 -0.03399 0.01563 -0.00781 *

* Nb 8 0.00449 0.02831 0.02129 *

* Nb 9 -0.01963 -0.07507 0.00540 *

* Nb 10 -0.00902 0.01270 -0.00813 *

* Nb 11 0.00502 0.02411 -0.05464 *

* Nb 12 -0.01865 0.02617 0.05800 *

* Nb 13 0.00369 -0.01315 0.00843 *

* Nb 14 0.02257 0.07829 -0.00643 *

* Nb 15 -0.00602 -0.02627 0.05702 *

* Nb 16 0.02050 -0.02690 -0.05841 *

* Nb 17 -0.00247 -0.06638 0.01809 *

* Nb 18 0.04749 0.01269 0.00467 *

* Nb 19 0.03487 -0.01056 0.00333 *

* Nb 20 -0.00549 -0.02446 -0.01802 *

* *

******************************************************************************

***************** Stress Tensor *****************

* *

* Cartesian components (GPa) *

* --------------------------------------------- *

* x y z *

* *

* x -0.061068 -0.028169 0.050003 *

* y -0.028169 -0.042722 -0.055688 *

* z 0.050003 -0.055688 -0.050451 *

* *

* Pressure: 0.0514 *

* *

*************************************************

+------------+-------------+-------------+-----------------+ <-- min BFGS

| Step | lambda | F.delta | enthalpy | <-- min BFGS

+------------+-------------+-------------+-----------------+ <-- min BFGS

| previous | 0.000000 | 0.000022 | -36259.829229 | <-- min BFGS

| trial step | 1.000000 | 0.000023 | -36259.829972 | <-- min BFGS

| line step | -15.574494 | 0.000080 | -36259.806425 | <-- min BFGS

| quad step | 6.884290 | 1.563E-006 | -36259.832119 | <-- min BFGS

+------------+-------------+-------------+-----------------+ <-- min BFGS

BFGS: finished iteration 19 with enthalpy= -3.62598321E+004 eV

+-----------+-----------------+-----------------+------------+-----+ <-- BFGS

| Parameter | value | tolerance | units | OK? | <-- BFGS

+-----------+-----------------+-----------------+------------+-----+ <-- BFGS

| dE/ion | 7.225597E-005 | 5.000000E-006 | eV | No | <-- BFGS

| |F|max | 1.283220E-001 | 1.000000E-002 | eV/A | No | <-- BFGS

| |dR|max | 3.029112E-003 | 5.000000E-004 | A | No | <-- BFGS

| Smax | 6.106764E-002 | 2.000000E-002 | GPa | No | <-- BFGS

+-----------+-----------------+-----------------+------------+-----+ <-- BFGS

================================================================================

Starting BFGS iteration 20 ...

================================================================================

Writing analysis data to 2H-Nb1.1Se2-7-UF.castep_bin

Writing model to 2H-Nb1.1Se2-7-UF.check

+------------+-------------+-------------+-----------------+ <-- min BFGS

| Step | lambda | F.delta | enthalpy | <-- min BFGS

+------------+-------------+-------------+-----------------+ <-- min BFGS

| previous | 0.000000 | 0.000084 | -36259.832119 | <-- min BFGS

+------------+-------------+-------------+-----------------+ <-- min BFGS

--------------------------------------------------------------------------------

BFGS: starting iteration 20 with trial guess (lambda= 1.000000)

--------------------------------------------------------------------------------

-------------------------------

Unit Cell

-------------------------------

Real Lattice(A) Reciprocal Lattice(1/A)

14.9204272 -8.3709641 0.0015689 0.4194493 -0.0029653 0.0000489

0.0239646 3.3898454 -0.0014691 1.0357981 1.8462093 0.0007845

-0.0016531 -0.0049650 13.8675216 0.0000623 0.0001959 0.4530865

Lattice parameters(A) Cell Angles

a = 17.108249 alpha = 90.045391

b = 3.389930 beta = 89.990665

c = 13.867523 gamma = 118.889143

Current cell volume = 704.172493 A**3

-------------------------------

Cell Contents

-------------------------------

xxxxxxxxxxxxxxxxxxxxxxxxxxxxxxxxxxxxxxxxxxxxxxxxxxxxxxxxxxxx

x Element Atom Fractional coordinates of atoms x

x Number u v w x

x----------------------------------------------------------x

x Se 1 0.067023 0.664226 0.126909 x

x Se 2 0.132317 0.336344 0.626857 x

x Se 3 0.132361 0.336811 0.872970 x

x Se 4 0.067089 0.664461 0.373381 x

x Se 5 0.266842 0.665175 0.126661 x

x Se 6 0.331904 0.334825 0.626568 x

x Se 7 0.331998 0.335416 0.873172 x

x Se 8 0.266850 0.665138 0.373367 x

x Se 9 0.467681 0.662716 0.127180 x

x Se 10 0.532298 0.336099 0.626678 x

x Se 11 0.532316 0.337281 0.872825 x

x Se 12 0.467698 0.663897 0.373321 x

x Se 13 0.668009 0.664605 0.126813 x

x Se 14 0.733149 0.334848 0.626634 x

x Se 15 0.733156 0.334811 0.873339 x

x Se 16 0.668101 0.665192 0.373441 x

x Se 17 0.867635 0.663164 0.127043 x

x Se 18 0.932914 0.335554 0.626622 x

x Se 19 0.932980 0.335790 0.873085 x

x Se 20 0.867680 0.663638 0.373131 x

x Nb 1 -0.000354 -0.001544 0.250065 x

x Nb 2 0.000343 0.001611 0.749935 x

x Nb 3 -0.000003 -0.000045 0.000011 x

x Nb 4 -0.000003 -0.000041 0.499989 x

x Nb 5 0.198688 -0.002425 0.250110 x

x Nb 6 0.200851 0.005010 0.749826 x

x Nb 7 0.199912 0.000145 0.000251 x

x Nb 8 0.200011 0.000530 0.499829 x

x Nb 9 0.399912 -0.002132 0.250203 x

x Nb 10 0.400176 0.001604 0.749945 x

x Nb 11 0.399748 0.001013 -0.000010 x

x Nb 12 0.399581 0.000442 0.499906 x

x Nb 13 0.599811 -0.001641 0.250054 x

x Nb 14 0.600095 0.002207 0.749794 x

x Nb 15 0.600248 -0.001043 0.000019 x

x Nb 16 0.600421 -0.000450 0.500089 x

x Nb 17 0.799160 -0.005042 0.250177 x

x Nb 18 0.801318 0.002357 0.749892 x

x Nb 19 0.800095 -0.000069 -0.000270 x

x Nb 20 0.799990 -0.000476 0.500187 x

xxxxxxxxxxxxxxxxxxxxxxxxxxxxxxxxxxxxxxxxxxxxxxxxxxxxxxxxxxxx

------------------------------------------------------------------------ <-- SCF

SCF loop Energy Energy gain Timer <-- SCF

per atom (sec) <-- SCF

------------------------------------------------------------------------ <-- SCF

Initial -3.62597721E+004 15407.94 <-- SCF

1 -3.62600089E+004 5.92076912E-003 15435.05 <-- SCF

2 -3.62600229E+004 3.49904823E-004 15462.88 <-- SCF

3 -3.62599863E+004 -9.15984388E-004 15489.45 <-- SCF

4 -3.62598298E+004 -3.91321538E-003 15515.36 <-- SCF

5 -3.62598354E+004 1.40869740E-004 15541.31 <-- SCF

6 -3.62598338E+004 -3.86758401E-005 15565.56 <-- SCF

7 -3.62598335E+004 -8.18739042E-006 15587.05 <-- SCF

8 -3.62598336E+004 2.61832767E-006 15606.28 <-- SCF

9 -3.62598337E+004 2.61295103E-006 15623.88 <-- SCF

10 -3.62598338E+004 2.19794669E-006 15640.64 <-- SCF

11 -3.62598339E+004 1.77545264E-006 15656.69 <-- SCF

12 -3.62598339E+004 1.62701558E-006 15672.77 <-- SCF

13 -3.62598340E+004 1.63497659E-006 15689.38 <-- SCF

14 -3.62598341E+004 1.48194556E-006 15705.39 <-- SCF

15 -3.62598341E+004 1.38059072E-006 15721.58 <-- SCF

16 -3.62598342E+004 1.26970488E-006 15737.72 <-- SCF

17 -3.62598342E+004 1.20600830E-006 15753.95 <-- SCF

18 -3.62598343E+004 1.08768117E-006 15770.05 <-- SCF

19 -3.62598343E+004 1.03553183E-006 15786.28 <-- SCF

20 -3.62598343E+004 9.62938894E-007 15802.66 <-- SCF

------------------------------------------------------------------------ <-- SCF

Final energy = -36259.83434759 eV

(energy not corrected for finite basis set)

*********************************** Forces ***********************************

* *

* Cartesian components (eV/A) *

* -------------------------------------------------------------------------- *

* x y z *

* *

* Se 1 -0.00259 0.01563 -0.05048 *

* Se 2 0.02653 0.06392 0.02063 *

* Se 3 0.03343 0.08099 -0.04587 *

* Se 4 0.00391 0.02453 0.07074 *

* Se 5 -0.01086 0.01661 -0.06241 *

* Se 6 0.03023 0.02940 0.03316 *

* Se 7 0.04460 0.03862 -0.05674 *

* Se 8 -0.02833 0.01575 0.05276 *

* Se 9 -0.02517 -0.11196 0.05190 *

* Se 10 0.01711 0.08322 -0.00936 *

* Se 11 0.02646 0.11285 -0.05285 *

* Se 12 -0.01598 -0.08267 0.01010 *

* Se 13 -0.04453 -0.03766 0.05477 *

* Se 14 0.02686 -0.01641 -0.05322 *

* Se 15 0.00897 -0.01730 0.06286 *

* Se 16 -0.03002 -0.02828 -0.03130 *

* Se 17 -0.03425 -0.08277 0.04750 *

* Se 18 -0.00256 -0.02375 -0.06964 *

* Se 19 0.00415 -0.01450 0.04971 *

* Se 20 -0.02725 -0.06592 -0.02251 *

* Nb 1 0.09425 0.01892 0.00085 *

* Nb 2 -0.09854 -0.01607 -0.00071 *

* Nb 3 -0.00006 -0.00208 0.00116 *

* Nb 4 -0.00101 -0.00236 -0.00198 *

* Nb 5 -0.02954 -0.02134 -0.00688 *

* Nb 6 -0.01528 0.06545 -0.00512 *

* Nb 7 -0.02138 0.01745 -0.01635 *

* Nb 8 0.00311 0.02426 0.01856 *

* Nb 9 -0.01571 -0.08624 0.00057 *

* Nb 10 -0.00818 0.03448 -0.01423 *

* Nb 11 0.00134 0.02153 -0.04358 *

* Nb 12 -0.01345 0.02386 0.05364 *

* Nb 13 0.00458 -0.03493 0.01403 *

* Nb 14 0.01798 0.08776 -0.00074 *

* Nb 15 -0.00228 -0.02257 0.04497 *

* Nb 16 0.01456 -0.02400 -0.05346 *

* Nb 17 0.01796 -0.06741 0.00539 *

* Nb 18 0.03203 0.01972 0.00693 *

* Nb 19 0.02232 -0.01464 0.01395 *

* Nb 20 -0.00343 -0.02205 -0.01677 *

* *

******************************************************************************

***************** Stress Tensor *****************

* *

* Cartesian components (GPa) *

* --------------------------------------------- *

* x y z *

* *

* x -0.018259 -0.073006 -0.001803 *

* y -0.073006 0.027213 -0.119649 *

* z -0.001803 -0.119649 -0.170606 *

* *

* Pressure: 0.0539 *

* *

*************************************************

+------------+-------------+-------------+-----------------+ <-- min BFGS

| Step | lambda | F.delta | enthalpy | <-- min BFGS

+------------+-------------+-------------+-----------------+ <-- min BFGS

| previous | 0.000000 | 0.000084 | -36259.832119 | <-- min BFGS

| trial step | 1.000000 | 0.000018 | -36259.834438 | <-- min BFGS

+------------+-------------+-------------+-----------------+ <-- min BFGS

BFGS: finished iteration 20 with enthalpy= -3.62598344E+004 eV

+-----------+-----------------+-----------------+------------+-----+ <-- BFGS

| Parameter | value | tolerance | units | OK? | <-- BFGS

+-----------+-----------------+-----------------+------------+-----+ <-- BFGS

| dE/ion | 5.797545E-005 | 5.000000E-006 | eV | No | <-- BFGS

| |F|max | 1.273873E-001 | 1.000000E-002 | eV/A | No | <-- BFGS

| |dR|max | 3.227973E-003 | 5.000000E-004 | A | No | <-- BFGS

| Smax | 1.706061E-001 | 2.000000E-002 | GPa | No | <-- BFGS

+-----------+-----------------+-----------------+------------+-----+ <-- BFGS

================================================================================

Starting BFGS iteration 21 ...

================================================================================

+------------+-------------+-------------+-----------------+ <-- min BFGS

| Step | lambda | F.delta | enthalpy | <-- min BFGS

+------------+-------------+-------------+-----------------+ <-- min BFGS

| previous | 0.000000 | 0.000081 | -36259.834438 | <-- min BFGS

+------------+-------------+-------------+-----------------+ <-- min BFGS

--------------------------------------------------------------------------------

BFGS: starting iteration 21 with trial guess (lambda= 1.000000)

--------------------------------------------------------------------------------

-------------------------------

Unit Cell

-------------------------------

Real Lattice(A) Reciprocal Lattice(1/A)

14.9235256 -8.3710976 0.0009350 0.4193589 -0.0029711 0.0000637

0.0240180 3.3900004 -0.0014706 1.0355441 1.8461103 0.0008216

-0.0021412 -0.0049717 13.8701135 0.0000815 0.0001959 0.4530018

Lattice parameters(A) Cell Angles

a = 17.111017 alpha = 90.045454

b = 3.390086 beta = 89.994536

c = 13.870115 gamma = 118.883570

Current cell volume = 704.488107 A**3

-------------------------------

Cell Contents

-------------------------------

xxxxxxxxxxxxxxxxxxxxxxxxxxxxxxxxxxxxxxxxxxxxxxxxxxxxxxxxxxxx

x Element Atom Fractional coordinates of atoms x

x Number u v w x

x----------------------------------------------------------x

x Se 1 0.067058 0.664346 0.126993 x

x Se 2 0.132231 0.336383 0.627003 x

x Se 3 0.132280 0.336951 0.872801 x

x Se 4 0.067139 0.664645 0.373315 x

x Se 5 0.266874 0.665071 0.126658 x

x Se 6 0.331804 0.334789 0.626742 x

x Se 7 0.331918 0.335494 0.872966 x

x Se 8 0.266882 0.665017 0.373344 x

x Se 9 0.467666 0.662178 0.127350 x

x Se 10 0.532328 0.336496 0.626777 x

x Se 11 0.532331 0.337819 0.872656 x

x Se 12 0.467667 0.663499 0.373222 x

x Se 13 0.668089 0.664532 0.127016 x

x Se 14 0.733117 0.334966 0.626658 x

x Se 15 0.733124 0.334911 0.873342 x

x Se 16 0.668202 0.665232 0.373269 x

x Se 17 0.867716 0.663019 0.127215 x

x Se 18 0.932865 0.335372 0.626689 x

x Se 19 0.932945 0.335674 0.873001 x

x Se 20 0.867765 0.663595 0.372983 x

x Nb 1 -0.000302 -0.001332 0.250056 x

x Nb 2 0.000289 0.001410 0.749943 x

x Nb 3 -0.000004 -0.000054 0.000012 x

x Nb 4 -0.000004 -0.000051 0.499987 x

x Nb 5 0.198566 -0.002656 0.250106 x

x Nb 6 0.200914 0.005472 0.749813 x

x Nb 7 0.199889 0.000144 0.000270 x

x Nb 8 0.200012 0.000617 0.499826 x

x Nb 9 0.399911 -0.002348 0.250211 x

x Nb 10 0.400156 0.001662 0.749952 x

x Nb 11 0.399734 0.001143 -0.000050 x

x Nb 12 0.399534 0.000470 0.499934 x

x Nb 13 0.599828 -0.001706 0.250047 x

x Nb 14 0.600098 0.002439 0.749785 x

x Nb 15 0.600261 -0.001178 0.000061 x

x Nb 16 0.600468 -0.000478 0.500061 x

x Nb 17 0.799098 -0.005513 0.250190 x

x Nb 18 0.801442 0.002577 0.749896 x

x Nb 19 0.800119 -0.000054 -0.000293 x

x Nb 20 0.799989 -0.000554 0.500192 x

xxxxxxxxxxxxxxxxxxxxxxxxxxxxxxxxxxxxxxxxxxxxxxxxxxxxxxxxxxxx

------------------------------------------------------------------------ <-- SCF

SCF loop Energy Energy gain Timer <-- SCF

per atom (sec) <-- SCF

------------------------------------------------------------------------ <-- SCF

Initial -3.62597994E+004 15905.39 <-- SCF

1 -3.62599694E+004 4.24910846E-003 15932.61 <-- SCF

2 -3.62599804E+004 2.76113757E-004 15959.80 <-- SCF

3 -3.62599530E+004 -6.86132341E-004 15986.41 <-- SCF

4 -3.62598320E+004 -3.02388436E-003 16012.22 <-- SCF

5 -3.62598384E+004 1.60287061E-004 16038.23 <-- SCF

6 -3.62598368E+004 -4.22042387E-005 16062.94 <-- SCF

7 -3.62598361E+004 -1.76681192E-005 16084.88 <-- SCF

8 -3.62598360E+004 -6.01012738E-007 16103.92 <-- SCF

9 -3.62598361E+004 1.81561298E-006 16121.52 <-- SCF

------------------------------------------------------------------------ <-- SCF

Final energy = -36259.83610130 eV

(energy not corrected for finite basis set)

*********************************** Forces ***********************************

* *

* Cartesian components (eV/A) *

* -------------------------------------------------------------------------- *

* x y z *

* *

* Se 1 -0.02041 0.00922 -0.06251 *

* Se 2 0.05741 0.08028 0.02390 *

* Se 3 0.06269 0.08724 -0.03517 *

* Se 4 -0.01745 0.02212 0.08151 *

* Se 5 -0.02594 0.02794 -0.06515 *

* Se 6 0.07037 0.02188 0.03150 *

* Se 7 0.08004 0.02861 -0.03932 *

* Se 8 -0.04577 0.02948 0.06064 *

* Se 9 -0.03189 -0.10662 0.02575 *

* Se 10 0.01168 0.09520 -0.00131 *

* Se 11 0.03312 0.10781 -0.02731 *

* Se 12 -0.01053 -0.09453 0.00200 *

* Se 13 -0.08032 -0.02761 0.03892 *

* Se 14 0.04494 -0.03013 -0.06119 *

* Se 15 0.02457 -0.02862 0.06568 *

* Se 16 -0.06994 -0.02101 -0.02963 *

* Se 17 -0.06340 -0.08861 0.03481 *

* Se 18 0.01823 -0.02121 -0.08066 *

* Se 19 0.02169 -0.00797 0.06192 *

* Se 20 -0.05829 -0.08252 -0.02476 *

* Nb 1 0.10465 0.01526 0.00470 *

* Nb 2 -0.10785 -0.01335 -0.00449 *

* Nb 3 -0.00015 -0.00175 0.00082 *

* Nb 4 -0.00095 -0.00194 -0.00152 *

* Nb 5 -0.01228 -0.02787 -0.00607 *

* Nb 6 -0.03947 0.06866 -0.00442 *

* Nb 7 -0.02103 0.01829 -0.02529 *

* Nb 8 -0.00395 0.02146 0.02152 *

* Nb 9 -0.02139 -0.09153 0.00292 *

* Nb 10 -0.01232 0.04165 -0.01949 *

* Nb 11 0.00090 0.01858 -0.04569 *

* Nb 12 -0.01205 0.01975 0.05673 *

* Nb 13 0.00971 -0.04171 0.01933 *

* Nb 14 0.02284 0.09228 -0.00282 *

* Nb 15 -0.00159 -0.01956 0.04661 *

* Nb 16 0.01282 -0.02015 -0.05648 *

* Nb 17 0.04138 -0.07008 0.00450 *

* Nb 18 0.01431 0.02671 0.00597 *

* Nb 19 0.02180 -0.01602 0.02374 *

* Nb 20 0.00382 -0.01956 -0.02019 *

* *

******************************************************************************

***************** Stress Tensor *****************

* *

* Cartesian components (GPa) *

* --------------------------------------------- *

* x y z *

* *

* x 0.011060 -0.078831 -0.032289 *

* y -0.078831 0.096103 -0.116053 *

* z -0.032289 -0.116053 -0.114708 *

* *

* Pressure: 0.0025 *

* *

*************************************************

+------------+-------------+-------------+-----------------+ <-- min BFGS

| Step | lambda | F.delta | enthalpy | <-- min BFGS

+------------+-------------+-------------+-----------------+ <-- min BFGS

| previous | 0.000000 | 0.000081 | -36259.834438 | <-- min BFGS

| trial step | 1.000000 | 0.000046 | -36259.836168 | <-- min BFGS

+------------+-------------+-------------+-----------------+ <-- min BFGS

--------------------------------------------------------------------------------

BFGS: improving iteration 21 with line minimization (lambda= 2.334888)

--------------------------------------------------------------------------------

-------------------------------

Unit Cell

-------------------------------

Real Lattice(A) Reciprocal Lattice(1/A)

14.9276616 -8.3712757 0.0000888 0.4192383 -0.0029789 0.0000833

0.0240894 3.3902073 -0.0014726 1.0352052 1.8459783 0.0008711

-0.0027929 -0.0049807 13.8735734 0.0001072 0.0001960 0.4528888

Lattice parameters(A) Cell Angles

a = 17.114711 alpha = 90.045538

b = 3.390293 beta = 89.999702

c = 13.873575 gamma = 118.876135

Current cell volume = 704.909542 A**3

-------------------------------

Cell Contents

-------------------------------

xxxxxxxxxxxxxxxxxxxxxxxxxxxxxxxxxxxxxxxxxxxxxxxxxxxxxxxxxxxx

x Element Atom Fractional coordinates of atoms x

x Number u v w x

x----------------------------------------------------------x

x Se 1 0.067106 0.664506 0.127104 x

x Se 2 0.132116 0.336435 0.627198 x

x Se 3 0.132171 0.337138 0.872576 x

x Se 4 0.067206 0.664891 0.373226 x

x Se 5 0.266917 0.664932 0.126655 x

x Se 6 0.331671 0.334741 0.626974 x

x Se 7 0.331813 0.335598 0.872691 x

x Se 8 0.266923 0.664856 0.373312 x

x Se 9 0.467646 0.661460 0.127577 x

x Se 10 0.532368 0.337027 0.626908 x

x Se 11 0.532351 0.338538 0.872429 x

x Se 12 0.467626 0.662969 0.373090 x

x Se 13 0.668197 0.664434 0.127288 x

x Se 14 0.733075 0.335123 0.626690 x

x Se 15 0.733080 0.335045 0.873345 x

x Se 16 0.668336 0.665285 0.373040 x

x Se 17 0.867823 0.662824 0.127444 x

x Se 18 0.932799 0.335129 0.626779 x

x Se 19 0.932898 0.335518 0.872888 x

x Se 20 0.867880 0.663537 0.372785 x

x Nb 1 -0.000233 -0.001050 0.250044 x

x Nb 2 0.000216 0.001143 0.749955 x

x Nb 3 -0.000004 -0.000066 0.000015 x

x Nb 4 -0.000005 -0.000064 0.499984 x

x Nb 5 0.198402 -0.002965 0.250100 x

x Nb 6 0.200999 0.006089 0.749797 x

x Nb 7 0.199857 0.000143 0.000295 x

x Nb 8 0.200014 0.000733 0.499821 x

x Nb 9 0.399910 -0.002635 0.250223 x

x Nb 10 0.400131 0.001739 0.749962 x

x Nb 11 0.399716 0.001317 -0.000104 x

x Nb 12 0.399473 0.000508 0.499971 x

x Nb 13 0.599850 -0.001794 0.250038 x

x Nb 14 0.600102 0.002749 0.749773 x

x Nb 15 0.600279 -0.001358 0.000117 x

x Nb 16 0.600530 -0.000515 0.500023 x

x Nb 17 0.799016 -0.006141 0.250207 x

x Nb 18 0.801607 0.002871 0.749902 x

x Nb 19 0.800152 -0.000034 -0.000323 x

x Nb 20 0.799988 -0.000658 0.500200 x

xxxxxxxxxxxxxxxxxxxxxxxxxxxxxxxxxxxxxxxxxxxxxxxxxxxxxxxxxxxx

------------------------------------------------------------------------ <-- SCF

SCF loop Energy Energy gain Timer <-- SCF

per atom (sec) <-- SCF

------------------------------------------------------------------------ <-- SCF

Initial -3.62597715E+004 16224.61 <-- SCF

1 -3.62600725E+004 7.52500630E-003 16251.75 <-- SCF

2 -3.62600918E+004 4.83500576E-004 16278.88 <-- SCF

3 -3.62600422E+004 -1.24121930E-003 16305.45 <-- SCF

4 -3.62598296E+004 -5.31308338E-003 16331.03 <-- SCF

5 -3.62598407E+004 2.75876425E-004 16357.31 <-- SCF

6 -3.62598377E+004 -7.32946574E-005 16382.83 <-- SCF

7 -3.62598365E+004 -3.18195466E-005 16406.16 <-- SCF

8 -3.62598364E+004 -1.41720970E-006 16426.12 <-- SCF

9 -3.62598365E+004 2.62320810E-006 16443.91 <-- SCF

10 -3.62598366E+004 1.84975292E-006 16461.34 <-- SCF

11 -3.62598366E+004 1.41745517E-006 16478.17 <-- SCF

12 -3.62598367E+004 9.47821978E-007 16494.92 <-- SCF

13 -3.62598367E+004 7.61915675E-007 16511.62 <-- SCF

------------------------------------------------------------------------ <-- SCF

Final energy = -36259.83671192 eV

(energy not corrected for finite basis set)

*********************************** Forces ***********************************

* *

* Cartesian components (eV/A) *

* -------------------------------------------------------------------------- *

* x y z *

* *

* Se 1 -0.04165 -0.00117 -0.08425 *

* Se 2 0.09337 0.09838 0.00951 *

* Se 3 0.09678 0.08720 0.00860 *

* Se 4 -0.04247 0.01745 0.09850 *

* Se 5 -0.03973 0.04259 -0.07504 *

* Se 6 0.12543 0.00432 0.01368 *

* Se 7 0.13176 0.01865 0.01128 *

* Se 8 -0.06390 0.04615 0.07427 *

* Se 9 -0.03349 -0.09175 -0.03232 *

* Se 10 0.00650 0.10936 0.00693 *

* Se 11 0.03479 0.09305 0.03032 *

* Se 12 -0.00534 -0.10862 -0.00623 *

* Se 13 -0.13236 -0.01705 -0.00920 *

* Se 14 0.06362 -0.04698 -0.07482 *

* Se 15 0.03885 -0.04343 0.07555 *

* Se 16 -0.12486 -0.00375 -0.01282 *

* Se 17 -0.09738 -0.08791 -0.01167 *

* Se 18 0.04284 -0.01644 -0.09780 *

* Se 19 0.04271 0.00250 0.08376 *

* Se 20 -0.09440 -0.10059 -0.00837 *

* Nb 1 0.12784 0.01286 0.00795 *

* Nb 2 -0.13010 -0.01196 -0.00774 *

* Nb 3 -0.00026 -0.00144 0.00052 *

* Nb 4 -0.00075 -0.00164 -0.00112 *

* Nb 5 0.01374 -0.03821 -0.00708 *

* Nb 6 -0.06169 0.07067 -0.00340 *

* Nb 7 -0.01644 0.01764 -0.03364 *

* Nb 8 -0.00346 0.01786 0.02513 *

* Nb 9 -0.02399 -0.09904 0.00352 *

* Nb 10 -0.01289 0.04700 -0.02461 *

* Nb 11 0.00449 0.01402 -0.04986 *

* Nb 12 -0.00917 0.01479 0.06149 *

* Nb 13 0.01103 -0.04688 0.02441 *

* Nb 14 0.02465 0.09916 -0.00329 *

* Nb 15 -0.00535 -0.01496 0.05044 *

* Nb 16 0.00935 -0.01532 -0.06118 *

* Nb 17 0.06296 -0.07169 0.00327 *

* Nb 18 -0.01208 0.03733 0.00689 *

* Nb 19 0.01736 -0.01584 0.03262 *

* Nb 20 0.00366 -0.01628 -0.02420 *

* *

******************************************************************************

***************** Stress Tensor *****************

* *

* Cartesian components (GPa) *

* --------------------------------------------- *

* x y z *

* *

* x 0.049497 -0.089375 -0.044278 *

* y -0.089375 0.182814 -0.110147 *

* z -0.044278 -0.110147 -0.042676 *

* *

* Pressure: -0.0632 *

* *

*************************************************

+------------+-------------+-------------+-----------------+ <-- min BFGS

| Step | lambda | F.delta | enthalpy | <-- min BFGS

+------------+-------------+-------------+-----------------+ <-- min BFGS

| previous | 0.000000 | 0.000081 | -36259.834438 | <-- min BFGS

| trial step | 1.000000 | 0.000046 | -36259.836168 | <-- min BFGS

| line step | 2.334888 | -0.000022 | -36259.836771 | <-- min BFGS

+------------+-------------+-------------+-----------------+ <-- min BFGS

BFGS: finished iteration 21 with enthalpy= -3.62598368E+004 eV

+-----------+-----------------+-----------------+------------+-----+ <-- BFGS

| Parameter | value | tolerance | units | OK? | <-- BFGS

+-----------+-----------------+-----------------+------------+-----+ <-- BFGS

| dE/ion | 5.831351E-005 | 5.000000E-006 | eV | No | <-- BFGS

| |F|max | 1.382017E-001 | 1.000000E-002 | eV/A | No | <-- BFGS

| |dR|max | 7.550702E-003 | 5.000000E-004 | A | No | <-- BFGS

| Smax | 1.828141E-001 | 2.000000E-002 | GPa | No | <-- BFGS

+-----------+-----------------+-----------------+------------+-----+ <-- BFGS

================================================================================

Starting BFGS iteration 22 ...

================================================================================

+------------+-------------+-------------+-----------------+ <-- min BFGS

| Step | lambda | F.delta | enthalpy | <-- min BFGS

+------------+-------------+-------------+-----------------+ <-- min BFGS

| previous | 0.000000 | 0.000123 | -36259.836771 | <-- min BFGS

+------------+-------------+-------------+-----------------+ <-- min BFGS

--------------------------------------------------------------------------------

BFGS: starting iteration 22 with trial guess (lambda= 1.000000)

--------------------------------------------------------------------------------

-------------------------------

Unit Cell

-------------------------------

Real Lattice(A) Reciprocal Lattice(1/A)

14.9281234 -8.3722093 -0.0005099 0.4192692 -0.0029005 0.0000950

0.0234489 3.3894956 -0.0014352 1.0356142 1.8465587 0.0008829

-0.0031782 -0.0048529 13.8777124 0.0001225 0.0001909 0.4527538

Lattice parameters(A) Cell Angles

a = 17.115571 alpha = 90.044385

b = 3.389577 beta = 90.003351

c = 13.877714 gamma = 118.888845

Current cell volume = 704.920018 A**3

-------------------------------

Cell Contents

-------------------------------

xxxxxxxxxxxxxxxxxxxxxxxxxxxxxxxxxxxxxxxxxxxxxxxxxxxxxxxxxxxx

x Element Atom Fractional coordinates of atoms x

x Number u v w x

x----------------------------------------------------------x

x Se 1 0.067106 0.664623 0.126905 x

x Se 2 0.132120 0.336493 0.627043 x

x Se 3 0.132178 0.337249 0.872706 x

x Se 4 0.067209 0.665041 0.373439 x

x Se 5 0.266921 0.664950 0.126421 x

x Se 6 0.331675 0.334754 0.626848 x

x Se 7 0.331831 0.335682 0.872789 x

x Se 8 0.266919 0.664839 0.373533 x

x Se 9 0.467611 0.661167 0.127449 x

x Se 10 0.532411 0.337254 0.626727 x

x Se 11 0.532386 0.338832 0.872558 x

x Se 12 0.467583 0.662742 0.373271 x

x Se 13 0.668180 0.664354 0.127187 x

x Se 14 0.733079 0.335136 0.626469 x

x Se 15 0.733075 0.335025 0.873579 x

x Se 16 0.668333 0.665276 0.373168 x

x Se 17 0.867815 0.662708 0.127315 x

x Se 18 0.932796 0.334981 0.626567 x

x Se 19 0.932899 0.335404 0.873086 x

x Se 20 0.867875 0.663476 0.372938 x

x Nb 1 -0.000143 -0.000674 0.250037 x

x Nb 2 0.000125 0.000774 0.749962 x

x Nb 3 -0.000005 -0.000072 0.000016 x

x Nb 4 -0.000006 -0.000072 0.499982 x

x Nb 5 0.198371 -0.003061 0.250092 x

x Nb 6 0.201001 0.006238 0.749790 x

x Nb 7 0.199838 0.000129 0.000292 x

x Nb 8 0.200014 0.000785 0.499835 x

x Nb 9 0.399907 -0.002773 0.250221 x

x Nb 10 0.400111 0.001704 0.749964 x

x Nb 11 0.399720 0.001388 -0.000154 x

x Nb 12 0.399456 0.000518 0.500018 x

x Nb 13 0.599868 -0.001765 0.250035 x

x Nb 14 0.600106 0.002898 0.749775 x

x Nb 15 0.600274 -0.001432 0.000169 x

x Nb 16 0.600548 -0.000523 0.499975 x

x Nb 17 0.799014 -0.006296 0.250214 x

x Nb 18 0.801640 0.002960 0.749911 x

x Nb 19 0.800173 -0.000010 -0.000322 x

x Nb 20 0.799988 -0.000703 0.500189 x

xxxxxxxxxxxxxxxxxxxxxxxxxxxxxxxxxxxxxxxxxxxxxxxxxxxxxxxxxxxx

------------------------------------------------------------------------ <-- SCF

SCF loop Energy Energy gain Timer <-- SCF

per atom (sec) <-- SCF

------------------------------------------------------------------------ <-- SCF

Initial -3.62598033E+004 16614.80 <-- SCF

1 -3.62599913E+004 4.70117716E-003 16642.14 <-- SCF

2 -3.62600018E+004 2.60314961E-004 16669.56 <-- SCF

3 -3.62599697E+004 -8.02480920E-004 16695.61 <-- SCF

4 -3.62598369E+004 -3.31875881E-003 16721.64 <-- SCF

5 -3.62598400E+004 7.72570157E-005 16747.47 <-- SCF

6 -3.62598392E+004 -1.90455145E-005 16770.02 <-- SCF

7 -3.62598392E+004 -1.89316368E-006 16790.94 <-- SCF

8 -3.62598392E+004 1.42118138E-006 16808.69 <-- SCF

------------------------------------------------------------------------ <-- SCF

Final energy = -36259.83921059 eV

(energy not corrected for finite basis set)

*********************************** Forces ***********************************

* *

* Cartesian components (eV/A) *

* -------------------------------------------------------------------------- *

* x y z *

* *

* Se 1 -0.02153 0.01643 -0.07384 *

* Se 2 0.07982 0.07076 0.04323 *

* Se 3 0.08571 0.06488 -0.03831 *

* Se 4 -0.02937 0.01994 0.07618 *

* Se 5 -0.03373 0.04244 -0.01861 *

* Se 6 0.10795 0.00100 0.02376 *

* Se 7 0.12025 0.01290 -0.01315 *

* Se 8 -0.05635 0.04774 0.01507 *

* Se 9 -0.02701 -0.07916 0.00568 *

* Se 10 0.01136 0.08977 0.00191 *

* Se 11 0.02812 0.08051 -0.00786 *

* Se 12 -0.01010 -0.08880 -0.00093 *

* Se 13 -0.12057 -0.01154 0.01484 *

* Se 14 0.05636 -0.04851 -0.01521 *

* Se 15 0.03315 -0.04316 0.01890 *

* Se 16 -0.10677 -0.00047 -0.02181 *

* Se 17 -0.08638 -0.06591 0.03555 *

* Se 18 0.02922 -0.01917 -0.07621 *

* Se 19 0.02226 -0.01519 0.07349 *

* Se 20 -0.08125 -0.07341 -0.04323 *

* Nb 1 0.11896 0.00356 0.00944 *

* Nb 2 -0.12037 -0.00326 -0.00925 *

* Nb 3 -0.00030 -0.00115 0.00028 *

* Nb 4 -0.00078 -0.00131 -0.00081 *

* Nb 5 0.01432 -0.04072 -0.00491 *

* Nb 6 -0.06209 0.07268 -0.00517 *

* Nb 7 -0.01568 0.01705 -0.03955 *

* Nb 8 -0.00352 0.01697 0.02860 *

* Nb 9 -0.03107 -0.10333 0.00723 *

* Nb 10 -0.00317 0.05337 -0.02840 *

* Nb 11 0.00300 0.01426 -0.04878 *

* Nb 12 -0.01109 0.01287 0.05945 *

* Nb 13 0.00184 -0.05304 0.02830 *

* Nb 14 0.03134 0.10308 -0.00695 *

* Nb 15 -0.00390 -0.01492 0.04912 *

* Nb 16 0.01115 -0.01312 -0.05890 *

* Nb 17 0.06286 -0.07329 0.00502 *

* Nb 18 -0.01308 0.04037 0.00476 *

* Nb 19 0.01664 -0.01550 0.03908 *

* Nb 20 0.00381 -0.01563 -0.02802 *

* *

******************************************************************************

***************** Stress Tensor *****************

* *

* Cartesian components (GPa) *

* --------------------------------------------- *

* x y z *

* *

* x 0.088980 -0.116861 -0.052127 *

* y -0.116861 0.167282 -0.106140 *

* z -0.052127 -0.106140 0.039535 *

* *

* Pressure: -0.0986 *

* *

*************************************************

+------------+-------------+-------------+-----------------+ <-- min BFGS

| Step | lambda | F.delta | enthalpy | <-- min BFGS

+------------+-------------+-------------+-----------------+ <-- min BFGS

| previous | 0.000000 | 0.000123 | -36259.836771 | <-- min BFGS

| trial step | 1.000000 | 0.000061 | -36259.839274 | <-- min BFGS

+------------+-------------+-------------+-----------------+ <-- min BFGS

--------------------------------------------------------------------------------

BFGS: improving iteration 22 with line minimization (lambda= 1.980133)

--------------------------------------------------------------------------------

-------------------------------

Unit Cell

-------------------------------

Real Lattice(A) Reciprocal Lattice(1/A)

14.9285759 -8.3731244 -0.0010967 0.4192994 -0.0028236 0.0001064

0.0228211 3.3887980 -0.0013985 1.0360153 1.8471279 0.0008944

-0.0035558 -0.0047276 13.8817691 0.0001375 0.0001859 0.4526215

Lattice parameters(A) Cell Angles

a = 17.116413 alpha = 90.043255

b = 3.388875 beta = 90.006926

c = 13.881770 gamma = 118.901306

Current cell volume = 704.930143 A**3

-------------------------------

Cell Contents

-------------------------------

xxxxxxxxxxxxxxxxxxxxxxxxxxxxxxxxxxxxxxxxxxxxxxxxxxxxxxxxxxxx

x Element Atom Fractional coordinates of atoms x

x Number u v w x

x----------------------------------------------------------x

x Se 1 0.067106 0.664738 0.126710 x

x Se 2 0.132125 0.336549 0.626891 x

x Se 3 0.132186 0.337358 0.872834 x

x Se 4 0.067213 0.665188 0.373647 x

x Se 5 0.266925 0.664966 0.126192 x

x Se 6 0.331678 0.334767 0.626725 x

x Se 7 0.331848 0.335765 0.872886 x

x Se 8 0.266914 0.664823 0.373751 x

x Se 9 0.467576 0.660880 0.127324 x

x Se 10 0.532454 0.337477 0.626549 x

x Se 11 0.532421 0.339120 0.872683 x

x Se 12 0.467540 0.662520 0.373449 x

x Se 13 0.668163 0.664276 0.127088 x

x Se 14 0.733083 0.335149 0.626252 x

x Se 15 0.733071 0.335005 0.873808 x

x Se 16 0.668330 0.665266 0.373292 x

x Se 17 0.867807 0.662595 0.127188 x

x Se 18 0.932793 0.334836 0.626360 x

x Se 19 0.932899 0.335292 0.873281 x

x Se 20 0.867870 0.663416 0.373089 x

x Nb 1 -0.000056 -0.000306 0.250030 x

x Nb 2 0.000035 0.000412 0.749970 x

x Nb 3 -0.000005 -0.000079 0.000017 x

x Nb 4 -0.000007 -0.000079 0.499981 x

x Nb 5 0.198340 -0.003156 0.250083 x

x Nb 6 0.201004 0.006383 0.749784 x

x Nb 7 0.199819 0.000115 0.000288 x

x Nb 8 0.200014 0.000837 0.499848 x

x Nb 9 0.399905 -0.002908 0.250219 x

x Nb 10 0.400091 0.001670 0.749967 x

x Nb 11 0.399724 0.001457 -0.000203 x

x Nb 12 0.399439 0.000527 0.500065 x

x Nb 13 0.599886 -0.001736 0.250032 x

x Nb 14 0.600110 0.003045 0.749776 x

x Nb 15 0.600270 -0.001504 0.000219 x

x Nb 16 0.600566 -0.000531 0.499929 x

x Nb 17 0.799012 -0.006447 0.250221 x

x Nb 18 0.801671 0.003048 0.749919 x

x Nb 19 0.800193 0.000013 -0.000321 x

x Nb 20 0.799988 -0.000748 0.500178 x

xxxxxxxxxxxxxxxxxxxxxxxxxxxxxxxxxxxxxxxxxxxxxxxxxxxxxxxxxxxx

------------------------------------------------------------------------ <-- SCF

SCF loop Energy Energy gain Timer <-- SCF

per atom (sec) <-- SCF

------------------------------------------------------------------------ <-- SCF

Initial -3.62598042E+004 16911.95 <-- SCF

1 -3.62600136E+004 5.23462867E-003 16939.23 <-- SCF

2 -3.62600258E+004 3.04167830E-004 16966.08 <-- SCF

3 -3.62599934E+004 -8.10481074E-004 16991.89 <-- SCF

4 -3.62598372E+004 -3.90460990E-003 17017.58 <-- SCF

5 -3.62598412E+004 9.97789545E-005 17043.33 <-- SCF

6 -3.62598402E+004 -2.45337858E-005 17067.33 <-- SCF

7 -3.62598400E+004 -3.73657152E-006 17088.22 <-- SCF

8 -3.62598401E+004 2.04015713E-006 17106.67 <-- SCF

9 -3.62598402E+004 1.29086309E-006 17124.09 <-- SCF

10 -3.62598402E+004 7.03429449E-007 17140.98 <-- SCF

------------------------------------------------------------------------ <-- SCF

Final energy = -36259.84019365 eV

(energy not corrected for finite basis set)

*********************************** Forces ***********************************

* *

* Cartesian components (eV/A) *

* -------------------------------------------------------------------------- *

* x y z *

* *

* Se 1 -0.00535 0.02710 -0.06033 *

* Se 2 0.06358 0.04313 0.06514 *

* Se 3 0.07410 0.04214 -0.07721 *

* Se 4 -0.02029 0.01245 0.03867 *

* Se 5 -0.03078 0.03770 0.00877 *

* Se 6 0.09047 -0.00268 0.02774 *

* Se 7 0.11206 0.00847 -0.03184 *

* Se 8 -0.05310 0.04499 -0.02148 *

* Se 9 -0.02010 -0.06458 0.04593 *

* Se 10 0.02147 0.06758 -0.00137 *

* Se 11 0.02099 0.06600 -0.04802 *

* Se 12 -0.02020 -0.06636 0.00246 *

* Se 13 -0.11191 -0.00736 0.03266 *

* Se 14 0.05347 -0.04585 0.02184 *

* Se 15 0.03055 -0.03846 -0.00861 *

* Se 16 -0.08862 0.00333 -0.02468 *

* Se 17 -0.07508 -0.04350 0.07549 *

* Se 18 0.01977 -0.01189 -0.03938 *

* Se 19 0.00561 -0.02619 0.06050 *

* Se 20 -0.06561 -0.04606 -0.06667 *

* Nb 1 0.11611 -0.00228 0.01008 *

* Nb 2 -0.11683 0.00238 -0.00991 *

* Nb 3 -0.00036 -0.00084 0.00006 *

* Nb 4 -0.00072 -0.00099 -0.00054 *

* Nb 5 0.01072 -0.04268 -0.00377 *

* Nb 6 -0.05299 0.07513 -0.00656 *

* Nb 7 -0.01209 0.01556 -0.04144 *

* Nb 8 -0.00152 0.01512 0.02811 *

* Nb 9 -0.03262 -0.10620 0.00933 *

* Nb 10 0.00818 0.05585 -0.02949 *

* Nb 11 0.00551 0.01342 -0.04519 *

* Nb 12 -0.01131 0.01128 0.05657 *

* Nb 13 -0.00925 -0.05530 0.02937 *

* Nb 14 0.03247 0.10578 -0.00904 *

* Nb 15 -0.00647 -0.01391 0.04532 *

* Nb 16 0.01117 -0.01144 -0.05592 *

* Nb 17 0.05349 -0.07541 0.00631 *

* Nb 18 -0.00970 0.04254 0.00362 *

* Nb 19 0.01322 -0.01411 0.04130 *

* Nb 20 0.00199 -0.01385 -0.02784 *

* *

******************************************************************************

***************** Stress Tensor *****************

* *

* Cartesian components (GPa) *

* --------------------------------------------- *

* x y z *

* *

* x 0.112377 -0.154394 -0.058860 *

* y -0.154394 0.148257 -0.101642 *

* z -0.058860 -0.101642 0.108188 *

* *

* Pressure: -0.1229 *

* *

*************************************************

+------------+-------------+-------------+-----------------+ <-- min BFGS

| Step | lambda | F.delta | enthalpy | <-- min BFGS

+------------+-------------+-------------+-----------------+ <-- min BFGS

| previous | 0.000000 | 0.000123 | -36259.836771 | <-- min BFGS

| trial step | 1.000000 | 0.000061 | -36259.839274 | <-- min BFGS

| line step | 1.980133 | 0.000010 | -36259.840262 | <-- min BFGS

+------------+-------------+-------------+-----------------+ <-- min BFGS

BFGS: finished iteration 22 with enthalpy= -3.62598403E+004 eV

+-----------+-----------------+-----------------+------------+-----+ <-- BFGS

| Parameter | value | tolerance | units | OK? | <-- BFGS

+-----------+-----------------+-----------------+------------+-----+ <-- BFGS

| dE/ion | 8.728543E-005 | 5.000000E-006 | eV | No | <-- BFGS

| |F|max | 1.172779E-001 | 1.000000E-002 | eV/A | No | <-- BFGS

| |dR|max | 6.423715E-003 | 5.000000E-004 | A | No | <-- BFGS

| Smax | 1.543939E-001 | 2.000000E-002 | GPa | No | <-- BFGS

+-----------+-----------------+-----------------+------------+-----+ <-- BFGS

================================================================================

Starting BFGS iteration 23 ...

================================================================================

+------------+-------------+-------------+-----------------+ <-- min BFGS

| Step | lambda | F.delta | enthalpy | <-- min BFGS

+------------+-------------+-------------+-----------------+ <-- min BFGS

| previous | 0.000000 | 0.000157 | -36259.840262 | <-- min BFGS

+------------+-------------+-------------+-----------------+ <-- min BFGS

--------------------------------------------------------------------------------

BFGS: starting iteration 23 with trial guess (lambda= 1.000000)

--------------------------------------------------------------------------------

-------------------------------

Unit Cell

-------------------------------

Real Lattice(A) Reciprocal Lattice(1/A)

14.9299210 -8.3741509 -0.0008504 0.4193740 -0.0026229 0.0001400

0.0211803 3.3864500 -0.0020762 1.0370455 1.8489046 0.0012701

-0.0046803 -0.0069145 13.8866771 0.0001807 0.0002763 0.4524616

Lattice parameters(A) Cell Angles

a = 17.118088 alpha = 90.063776

b = 3.386517 beta = 90.005732

c = 13.886680 gamma = 118.929589

Current cell volume = 704.565232 A**3

-------------------------------

Cell Contents

-------------------------------

xxxxxxxxxxxxxxxxxxxxxxxxxxxxxxxxxxxxxxxxxxxxxxxxxxxxxxxxxxxx

x Element Atom Fractional coordinates of atoms x

x Number u v w x

x----------------------------------------------------------x

x Se 1 0.067099 0.664673 0.126687 x

x Se 2 0.132179 0.337117 0.626968 x

x Se 3 0.132253 0.338052 0.872695 x

x Se 4 0.067197 0.665141 0.373698 x

x Se 5 0.266924 0.665051 0.126177 x

x Se 6 0.331689 0.335109 0.626820 x

x Se 7 0.331900 0.336288 0.872720 x

x Se 8 0.266869 0.664764 0.373724 x

x Se 9 0.467558 0.659986 0.127513 x

x Se 10 0.532476 0.338157 0.626565 x

x Se 11 0.532438 0.340018 0.872495 x

x Se 12 0.467517 0.661842 0.373433 x

x Se 13 0.668114 0.663765 0.127247 x

x Se 14 0.733127 0.335199 0.626278 x

x Se 15 0.733070 0.334911 0.873824 x

x Se 16 0.668322 0.664935 0.373202 x

x Se 17 0.867739 0.661886 0.127332 x

x Se 18 0.932809 0.334889 0.626310 x

x Se 19 0.932907 0.335366 0.873302 x

x Se 20 0.867815 0.662837 0.373006 x

x Nb 1 0.000218 0.000864 0.250020 x

x Nb 2 -0.000244 -0.000736 0.749979 x

x Nb 3 -0.000007 -0.000098 0.000021 x

x Nb 4 -0.000010 -0.000102 0.499976 x

x Nb 5 0.198240 -0.003527 0.250069 x

x Nb 6 0.201019 0.006909 0.749752 x

x Nb 7 0.199763 0.000058 0.000272 x

x Nb 8 0.200015 0.000972 0.499891 x

x Nb 9 0.399880 -0.003443 0.250222 x

x Nb 10 0.400070 0.001609 0.749959 x

x Nb 11 0.399732 0.001693 -0.000365 x

x Nb 12 0.399387 0.000586 0.500225 x

x Nb 13 0.599902 -0.001693 0.250040 x

x Nb 14 0.600140 0.003613 0.749772 x

x Nb 15 0.600260 -0.001751 0.000386 x

x Nb 16 0.600619 -0.000585 0.499768 x

x Nb 17 0.798999 -0.006990 0.250254 x

x Nb 18 0.801775 0.003400 0.749934 x

x Nb 19 0.800252 0.000101 -0.000313 x

x Nb 20 0.799988 -0.000865 0.500140 x

xxxxxxxxxxxxxxxxxxxxxxxxxxxxxxxxxxxxxxxxxxxxxxxxxxxxxxxxxxxx

------------------------------------------------------------------------ <-- SCF

SCF loop Energy Energy gain Timer <-- SCF

per atom (sec) <-- SCF

------------------------------------------------------------------------ <-- SCF

Initial -3.62597482E+004 17243.88 <-- SCF

1 -3.62600216E+004 6.83652522E-003 17271.28 <-- SCF

2 -3.62600370E+004 3.83858214E-004 17299.59 <-- SCF

3 -3.62599854E+004 -1.29062485E-003 17326.53 <-- SCF

4 -3.62598402E+004 -3.62896283E-003 17352.47 <-- SCF

5 -3.62598484E+004 2.04467219E-004 17379.14 <-- SCF

6 -3.62598450E+004 -8.43526573E-005 17404.66 <-- SCF

7 -3.62598438E+004 -3.01427784E-005 17426.75 <-- SCF

8 -3.62598438E+004 -9.18766646E-007 17446.91 <-- SCF

9 -3.62598438E+004 3.67813696E-007 17465.38 <-- SCF

------------------------------------------------------------------------ <-- SCF

Final energy = -36259.84378208 eV

(energy not corrected for finite basis set)

*********************************** Forces ***********************************

* *

* Cartesian components (eV/A) *

* -------------------------------------------------------------------------- *

* x y z *

* *

* Se 1 -0.00106 0.04581 -0.06437 *

* Se 2 0.03801 0.03503 0.08745 *

* Se 3 0.03877 0.01823 -0.06826 *

* Se 4 -0.00957 0.02410 0.03955 *

* Se 5 -0.03083 0.03816 0.00096 *

* Se 6 0.10614 -0.01223 0.03412 *

* Se 7 0.11010 0.00689 -0.01056 *

* Se 8 -0.04511 0.04883 -0.01263 *

* Se 9 -0.01128 -0.01871 0.00875 *

* Se 10 0.02222 0.04944 0.01175 *

* Se 11 0.01226 0.02010 -0.01133 *

* Se 12 -0.02078 -0.04806 -0.01060 *

* Se 13 -0.11163 -0.00524 0.01416 *

* Se 14 0.04654 -0.04971 0.01310 *

* Se 15 0.03133 -0.03900 -0.00093 *

* Se 16 -0.10398 0.01262 -0.03130 *

* Se 17 -0.03915 -0.01875 0.06320 *

* Se 18 0.00836 -0.02369 -0.04069 *

* Se 19 0.00090 -0.04511 0.06467 *

* Se 20 -0.04000 -0.03765 -0.08750 *

* Nb 1 0.11008 -0.02061 0.01302 *

* Nb 2 -0.11006 0.02022 -0.01289 *

* Nb 3 -0.00053 -0.00058 -0.00018 *

* Nb 4 -0.00080 -0.00086 -0.00026 *

* Nb 5 -0.00590 -0.04481 -0.00174 *

* Nb 6 -0.02803 0.08942 -0.01083 *

* Nb 7 -0.01010 0.02066 -0.03948 *

* Nb 8 0.00113 0.01971 0.02103 *

* Nb 9 -0.03279 -0.11918 0.02147 *

* Nb 10 0.01110 0.07632 -0.03707 *

* Nb 11 0.00649 0.00930 -0.03609 *

* Nb 12 -0.01609 0.00601 0.04528 *

* Nb 13 -0.01105 -0.07546 0.03718 *

* Nb 14 0.03173 0.11829 -0.02098 *

* Nb 15 -0.00752 -0.00982 0.03580 *

* Nb 16 0.01576 -0.00633 -0.04454 *

* Nb 17 0.02760 -0.08967 0.01033 *

* Nb 18 0.00661 0.04451 0.00148 *

* Nb 19 0.01143 -0.01961 0.03980 *

* Nb 20 -0.00034 -0.01857 -0.02089 *

* *

******************************************************************************

***************** Stress Tensor *****************

* *

* Cartesian components (GPa) *

* --------------------------------------------- *

* x y z *

* *

* x 0.095445 -0.258429 -0.071606 *

* y -0.258429 0.009262 -0.141290 *

* z -0.071606 -0.141290 0.071515 *

* *

* Pressure: -0.0587 *

* *

*************************************************

+------------+-------------+-------------+-----------------+ <-- min BFGS

| Step | lambda | F.delta | enthalpy | <-- min BFGS

+------------+-------------+-------------+-----------------+ <-- min BFGS

| previous | 0.000000 | 0.000157 | -36259.840262 | <-- min BFGS

| trial step | 1.000000 | 0.000090 | -36259.843827 | <-- min BFGS

+------------+-------------+-------------+-----------------+ <-- min BFGS

--------------------------------------------------------------------------------

BFGS: improving iteration 23 with line minimization (lambda= 2.350446)

--------------------------------------------------------------------------------

-------------------------------

Unit Cell

-------------------------------

Real Lattice(A) Reciprocal Lattice(1/A)

14.9317376 -8.3755371 -0.0005178 0.4194752 -0.0023511 0.0001855

0.0189644 3.3832792 -0.0029915 1.0384400 1.8513096 0.0017782

-0.0061989 -0.0098679 13.8933050 0.0002392 0.0003985 0.4522459

Lattice parameters(A) Cell Angles

a = 17.120351 alpha = 90.091498

b = 3.383334 beta = 90.004120

c = 13.893310 gamma = 118.967844

Current cell volume = 704.071449 A**3

-------------------------------

Cell Contents

-------------------------------

xxxxxxxxxxxxxxxxxxxxxxxxxxxxxxxxxxxxxxxxxxxxxxxxxxxxxxxxxxxx

x Element Atom Fractional coordinates of atoms x

x Number u v w x

x----------------------------------------------------------x

x Se 1 0.067090 0.664585 0.126657 x

x Se 2 0.132251 0.337884 0.627072 x

x Se 3 0.132344 0.338990 0.872507 x

x Se 4 0.067177 0.665078 0.373767 x

x Se 5 0.266923 0.665166 0.126156 x

x Se 6 0.331703 0.335571 0.626950 x

x Se 7 0.331970 0.336995 0.872495 x

x Se 8 0.266808 0.664683 0.373689 x

x Se 9 0.467534 0.658779 0.127768 x

x Se 10 0.532506 0.339074 0.626587 x

x Se 11 0.532462 0.341230 0.872241 x

x Se 12 0.467486 0.660927 0.373411 x

x Se 13 0.668048 0.663075 0.127463 x

x Se 14 0.733186 0.335266 0.626314 x

x Se 15 0.733070 0.334783 0.873845 x

x Se 16 0.668311 0.664489 0.373079 x

x Se 17 0.867646 0.660930 0.127527 x

x Se 18 0.932832 0.334959 0.626243 x

x Se 19 0.932918 0.335465 0.873330 x

x Se 20 0.867740 0.662054 0.372896 x

x Nb 1 0.000588 0.002444 0.250007 x

x Nb 2 -0.000621 -0.002287 0.749992 x

x Nb 3 -0.000009 -0.000125 0.000026 x

x Nb 4 -0.000013 -0.000133 0.499969 x

x Nb 5 0.198104 -0.004028 0.250049 x

x Nb 6 0.201041 0.007620 0.749710 x

x Nb 7 0.199686 -0.000020 0.000250 x

x Nb 8 0.200015 0.001156 0.499949 x

x Nb 9 0.399845 -0.004165 0.250225 x

x Nb 10 0.400043 0.001528 0.749948 x

x Nb 11 0.399743 0.002012 -0.000584 x

x Nb 12 0.399317 0.000666 0.500441 x

x Nb 13 0.599922 -0.001635 0.250050 x

x Nb 14 0.600180 0.004379 0.749767 x

x Nb 15 0.600246 -0.002084 0.000610 x

x Nb 16 0.600692 -0.000659 0.499551 x

x Nb 17 0.798981 -0.007723 0.250298 x

x Nb 18 0.801914 0.003875 0.749954 x

x Nb 19 0.800333 0.000220 -0.000301 x

x Nb 20 0.799988 -0.001024 0.500090 x

xxxxxxxxxxxxxxxxxxxxxxxxxxxxxxxxxxxxxxxxxxxxxxxxxxxxxxxxxxxx

------------------------------------------------------------------------ <-- SCF

SCF loop Energy Energy gain Timer <-- SCF

per atom (sec) <-- SCF

------------------------------------------------------------------------ <-- SCF

Initial -3.62596728E+004 17568.47 <-- SCF

1 -3.62600903E+004 1.04377853E-002 17595.64 <-- SCF

2 -3.62601116E+004 5.31596296E-004 17624.70 <-- SCF

3 -3.62599839E+004 -3.19384566E-003 17651.48 <-- SCF

4 -3.62598483E+004 -3.38792421E-003 17677.88 <-- SCF

5 -3.62598496E+004 3.04422195E-005 17704.77 <-- SCF

6 -3.62598459E+004 -9.14598559E-005 17730.30 <-- SCF

7 -3.62598453E+004 -1.43933059E-005 17752.70 <-- SCF

8 -3.62598454E+004 2.18138322E-006 17773.23 <-- SCF

9 -3.62598454E+004 9.12700297E-007 17791.11 <-- SCF

10 -3.62598455E+004 1.19493964E-006 17808.59 <-- SCF

11 -3.62598455E+004 9.28727497E-007 17825.83 <-- SCF

12 -3.62598456E+004 8.02392182E-007 17842.75 <-- SCF

------------------------------------------------------------------------ <-- SCF

Final energy = -36259.84556393 eV

(energy not corrected for finite basis set)

*********************************** Forces ***********************************

* *

* Cartesian components (eV/A) *

* -------------------------------------------------------------------------- *

* x y z *

* *

* Se 1 0.01046 0.07131 -0.07727 *

* Se 2 0.00136 0.01299 0.10504 *

* Se 3 -0.00685 -0.01361 -0.03348 *

* Se 4 0.01011 0.04002 0.03963 *

* Se 5 -0.02062 0.04205 -0.01768 *

* Se 6 0.13090 -0.02147 0.03811 *

* Se 7 0.10237 0.01189 0.03760 *

* Se 8 -0.02553 0.05511 -0.00417 *

* Se 9 0.01419 0.03577 -0.03872 *

* Se 10 0.01719 0.01180 0.03523 *

* Se 11 -0.01339 -0.03415 0.03577 *

* Se 12 -0.01596 -0.01020 -0.03390 *

* Se 13 -0.10634 -0.00942 -0.03060 *

* Se 14 0.02821 -0.05597 0.00456 *

* Se 15 0.02184 -0.04311 0.01759 *

* Se 16 -0.12905 0.02168 -0.03665 *

* Se 17 0.00606 0.01279 0.02559 *

* Se 18 -0.01148 -0.03976 -0.04150 *

* Se 19 -0.01060 -0.07082 0.07776 *

* Se 20 -0.00226 -0.01463 -0.10155 *

* Nb 1 0.09570 -0.05464 0.01001 *

* Nb 2 -0.09450 0.05308 -0.01009 *

* Nb 3 -0.00076 -0.00015 -0.00068 *

* Nb 4 -0.00059 -0.00043 0.00008 *

* Nb 5 -0.02158 -0.04745 -0.00370 *

* Nb 6 0.01008 0.10401 -0.01169 *

* Nb 7 -0.00240 0.02426 -0.03706 *

* Nb 8 0.01124 0.02199 0.01519 *

* Nb 9 -0.02786 -0.13451 0.02903 *

* Nb 10 0.02057 0.10469 -0.03937 *

* Nb 11 0.01611 0.00476 -0.02681 *

* Nb 12 -0.02083 -0.00286 0.02713 *

* Nb 13 -0.01989 -0.10367 0.03936 *

* Nb 14 0.02644 0.13301 -0.02863 *

* Nb 15 -0.01727 -0.00521 0.02613 *

* Nb 16 0.01998 0.00260 -0.02619 *

* Nb 17 -0.01126 -0.10398 0.01071 *

* Nb 18 0.02199 0.04742 0.00332 *

* Nb 19 0.00428 -0.02375 0.03782 *

* Nb 20 -0.01006 -0.02143 -0.01587 *

* *

******************************************************************************

***************** Stress Tensor *****************

* *

* Cartesian components (GPa) *

* --------------------------------------------- *

* x y z *

* *

* x 0.062521 -0.404260 -0.089616 *

* y -0.404260 -0.195938 -0.194892 *

* z -0.089616 -0.194892 0.003404 *

* *

* Pressure: 0.0433 *

* *

*************************************************

+------------+-------------+-------------+-----------------+ <-- min BFGS

| Step | lambda | F.delta | enthalpy | <-- min BFGS

+------------+-------------+-------------+-----------------+ <-- min BFGS

| previous | 0.000000 | 0.000157 | -36259.840262 | <-- min BFGS

| trial step | 1.000000 | 0.000090 | -36259.843827 | <-- min BFGS

| line step | 2.350446 | -0.000016 | -36259.845652 | <-- min BFGS

+------------+-------------+-------------+-----------------+ <-- min BFGS

BFGS: finished iteration 23 with enthalpy= -3.62598457E+004 eV

+-----------+-----------------+-----------------+------------+-----+ <-- BFGS

| Parameter | value | tolerance | units | OK? | <-- BFGS

+-----------+-----------------+-----------------+------------+-----+ <-- BFGS

| dE/ion | 1.347492E-004 | 5.000000E-006 | eV | No | <-- BFGS

| |F|max | 1.404010E-001 | 1.000000E-002 | eV/A | No | <-- BFGS

| |dR|max | 1.050426E-002 | 5.000000E-004 | A | No | <-- BFGS

| Smax | 4.042600E-001 | 2.000000E-002 | GPa | No | <-- BFGS

+-----------+-----------------+-----------------+------------+-----+ <-- BFGS

================================================================================

Starting BFGS iteration 24 ...

================================================================================

+------------+-------------+-------------+-----------------+ <-- min BFGS

| Step | lambda | F.delta | enthalpy | <-- min BFGS

+------------+-------------+-------------+-----------------+ <-- min BFGS

| previous | 0.000000 | 0.000088 | -36259.845652 | <-- min BFGS

+------------+-------------+-------------+-----------------+ <-- min BFGS

--------------------------------------------------------------------------------

BFGS: starting iteration 24 with trial guess (lambda= 1.000000)

--------------------------------------------------------------------------------

-------------------------------

Unit Cell

-------------------------------

Real Lattice(A) Reciprocal Lattice(1/A)

14.9237548 -8.3703966 -0.0019363 0.4196179 -0.0024983 0.0001608

0.0201432 3.3832071 -0.0020000 1.0381775 1.8509880 0.0012860

-0.0053653 -0.0066470 13.8991250 0.0002078 0.0002660 0.4520564

Lattice parameters(A) Cell Angles

a = 17.110874 alpha = 90.061402

b = 3.383268 beta = 90.012370

c = 13.899128 gamma = 118.945944

Current cell volume = 704.112117 A**3

-------------------------------

Cell Contents

-------------------------------

xxxxxxxxxxxxxxxxxxxxxxxxxxxxxxxxxxxxxxxxxxxxxxxxxxxxxxxxxxxx

x Element Atom Fractional coordinates of atoms x

x Number u v w x

x----------------------------------------------------------x

x Se 1 0.067104 0.664693 0.126624 x

x Se 2 0.132223 0.337913 0.627094 x

x Se 3 0.132316 0.339052 0.872480 x

x Se 4 0.067196 0.665206 0.373805 x

x Se 5 0.266932 0.665149 0.126093 x

x Se 6 0.331684 0.335579 0.626982 x

x Se 7 0.331959 0.337062 0.872455 x

x Se 8 0.266815 0.664660 0.373740 x

x Se 9 0.467522 0.658555 0.127784 x

x Se 10 0.532527 0.339264 0.626579 x

x Se 11 0.532474 0.341455 0.872224 x

x Se 12 0.467464 0.660738 0.373420 x

x Se 13 0.668059 0.663010 0.127502 x

x Se 14 0.733179 0.335287 0.626263 x

x Se 15 0.733060 0.334798 0.873907 x

x Se 16 0.668330 0.664483 0.373048 x

x Se 17 0.867673 0.660865 0.127554 x

x Se 18 0.932812 0.334832 0.626205 x

x Se 19 0.932905 0.335359 0.873363 x

x Se 20 0.867769 0.662021 0.372873 x

x Nb 1 0.000628 0.002570 0.250004 x

x Nb 2 -0.000662 -0.002410 0.749995 x

x Nb 3 -0.000009 -0.000129 0.000027 x

x Nb 4 -0.000014 -0.000138 0.499968 x

x Nb 5 0.198059 -0.004139 0.250045 x

x Nb 6 0.201060 0.007830 0.749704 x

x Nb 7 0.199675 -0.000011 0.000249 x

x Nb 8 0.200017 0.001207 0.499953 x

x Nb 9 0.399840 -0.004329 0.250231 x

x Nb 10 0.400035 0.001594 0.749945 x

x Nb 11 0.399741 0.002069 -0.000609 x

x Nb 12 0.399298 0.000671 0.500462 x

x Nb 13 0.599929 -0.001705 0.250052 x

x Nb 14 0.600187 0.004550 0.749762 x

x Nb 15 0.600248 -0.002143 0.000636 x

x Nb 16 0.600712 -0.000664 0.499530 x

x Nb 17 0.798963 -0.007936 0.250305 x

x Nb 18 0.801961 0.003982 0.749958 x

x Nb 19 0.800345 0.000218 -0.000302 x

x Nb 20 0.799987 -0.001070 0.500086 x

xxxxxxxxxxxxxxxxxxxxxxxxxxxxxxxxxxxxxxxxxxxxxxxxxxxxxxxxxxxx

------------------------------------------------------------------------ <-- SCF

SCF loop Energy Energy gain Timer <-- SCF

per atom (sec) <-- SCF

------------------------------------------------------------------------ <-- SCF

Initial -3.62598362E+004 17945.95 <-- SCF

1 -3.62598653E+004 7.27470690E-004 17973.27 <-- SCF

2 -3.62598668E+004 3.81248553E-005 17999.30 <-- SCF

3 -3.62598663E+004 -1.23615443E-005 18026.11 <-- SCF

4 -3.62598472E+004 -4.77760473E-004 18051.92 <-- SCF

5 -3.62598482E+004 2.67350105E-005 18076.47 <-- SCF

6 -3.62598479E+004 -7.50224524E-006 18097.16 <-- SCF

7 -3.62598478E+004 -2.78984451E-006 18115.89 <-- SCF

8 -3.62598478E+004 1.84000197E-007 18133.55 <-- SCF

9 -3.62598479E+004 1.43578987E-006 18151.83 <-- SCF

------------------------------------------------------------------------ <-- SCF

Final energy = -36259.84789738 eV

(energy not corrected for finite basis set)

*********************************** Forces ***********************************

* *

* Cartesian components (eV/A) *

* -------------------------------------------------------------------------- *

* x y z *

* *

* Se 1 0.00367 0.06357 -0.07447 *

* Se 2 0.00820 0.01307 0.10457 *

* Se 3 0.00059 -0.01542 -0.02919 *

* Se 4 -0.00069 0.03040 0.03354 *

* Se 5 -0.02765 0.03761 -0.01444 *

* Se 6 0.14123 -0.01892 0.03596 *

* Se 7 0.10866 0.01589 0.04511 *

* Se 8 -0.03525 0.05191 -0.01095 *

* Se 9 0.02156 0.03872 -0.03836 *

* Se 10 0.01220 0.00646 0.03311 *

* Se 11 -0.02089 -0.03703 0.03538 *

* Se 12 -0.01106 -0.00484 -0.03170 *

* Se 13 -0.11265 -0.01336 -0.03785 *

* Se 14 0.03807 -0.05285 0.01151 *

* Se 15 0.02893 -0.03876 0.01428 *

* Se 16 -0.13921 0.01923 -0.03481 *

* Se 17 -0.00127 0.01458 0.02124 *

* Se 18 -0.00090 -0.03016 -0.03564 *

* Se 19 -0.00407 -0.06335 0.07523 *

* Se 20 -0.00919 -0.01456 -0.10076 *

* Nb 1 0.10397 -0.04662 0.01126 *

* Nb 2 -0.10255 0.04506 -0.01133 *

* Nb 3 -0.00067 -0.00010 -0.00082 *

* Nb 4 -0.00063 -0.00049 0.00003 *

* Nb 5 -0.01775 -0.04464 -0.00228 *

* Nb 6 0.00503 0.09878 -0.01359 *

* Nb 7 -0.00513 0.02398 -0.03913 *

* Nb 8 0.01066 0.02237 0.01738 *

* Nb 9 -0.02910 -0.12874 0.03105 *

* Nb 10 0.01883 0.10013 -0.04080 *

* Nb 11 0.01629 0.00363 -0.02804 *

* Nb 12 -0.02401 -0.00491 0.02796 *

* Nb 13 -0.01774 -0.09909 0.04076 *

* Nb 14 0.02773 0.12728 -0.03076 *

* Nb 15 -0.01737 -0.00404 0.02728 *

* Nb 16 0.02337 0.00472 -0.02698 *

* Nb 17 -0.00655 -0.09876 0.01260 *

* Nb 18 0.01789 0.04456 0.00180 *

* Nb 19 0.00700 -0.02352 0.03998 *

* Nb 20 -0.00954 -0.02178 -0.01813 *

* *

******************************************************************************

***************** Stress Tensor *****************

* *

* Cartesian components (GPa) *

* --------------------------------------------- *

* x y z *

* *

* x 0.017828 -0.348122 -0.073157 *

* y -0.348122 -0.154537 -0.125393 *

* z -0.073157 -0.125393 0.066507 *

* *

* Pressure: 0.0234 *

* *

*************************************************

+------------+-------------+-------------+-----------------+ <-- min BFGS

| Step | lambda | F.delta | enthalpy | <-- min BFGS

+------------+-------------+-------------+-----------------+ <-- min BFGS

| previous | 0.000000 | 0.000088 | -36259.845652 | <-- min BFGS

| trial step | 1.000000 | 0.000065 | -36259.847941 | <-- min BFGS

+------------+-------------+-------------+-----------------+ <-- min BFGS

--------------------------------------------------------------------------------

BFGS: improving iteration 24 with line minimization (lambda= 3.899183)

--------------------------------------------------------------------------------

-------------------------------

Unit Cell

-------------------------------

Real Lattice(A) Reciprocal Lattice(1/A)

14.9006114 -8.3554936 -0.0060486 0.4200327 -0.0029253 0.0000896

0.0235605 3.3829981 0.0008746 1.0374171 1.8500582 -0.0001379

-0.0029485 0.0026909 13.9159985 0.0001174 -0.0001175 0.4515081

Lattice parameters(A) Cell Angles

a = 17.083399 alpha = 89.974193

b = 3.383080 beta = 90.036294

c = 13.915999 gamma = 118.882438

Current cell volume = 704.227381 A**3

-------------------------------

Cell Contents

-------------------------------

xxxxxxxxxxxxxxxxxxxxxxxxxxxxxxxxxxxxxxxxxxxxxxxxxxxxxxxxxxxx

x Element Atom Fractional coordinates of atoms x

x Number u v w x

x----------------------------------------------------------x

x Se 1 0.067143 0.665007 0.126530 x

x Se 2 0.132139 0.337998 0.627157 x

x Se 3 0.132237 0.339232 0.872400 x

x Se 4 0.067253 0.665578 0.373916 x

x Se 5 0.266959 0.665099 0.125913 x

x Se 6 0.331630 0.335603 0.627074 x

x Se 7 0.331927 0.337258 0.872339 x

x Se 8 0.266837 0.664593 0.373889 x

x Se 9 0.467485 0.657906 0.127832 x

x Se 10 0.532589 0.339817 0.626555 x

x Se 11 0.532511 0.342109 0.872175 x

x Se 12 0.467403 0.660189 0.373445 x

x Se 13 0.668091 0.662822 0.127617 x

x Se 14 0.733157 0.335350 0.626115 x

x Se 15 0.733032 0.334842 0.874088 x

x Se 16 0.668386 0.664466 0.372959 x

x Se 17 0.867751 0.660675 0.127635 x

x Se 18 0.932756 0.334465 0.626095 x

x Se 19 0.932867 0.335051 0.873456 x

x Se 20 0.867851 0.661926 0.372808 x

x Nb 1 0.000743 0.002937 0.249996 x

x Nb 2 -0.000781 -0.002765 0.750003 x

x Nb 3 -0.000010 -0.000142 0.000029 x

x Nb 4 -0.000015 -0.000153 0.499965 x

x Nb 5 0.197927 -0.004462 0.250034 x

x Nb 6 0.201115 0.008439 0.749686 x

x Nb 7 0.199642 0.000016 0.000247 x

x Nb 8 0.200020 0.001356 0.499966 x

x Nb 9 0.399825 -0.004804 0.250247 x

x Nb 10 0.400011 0.001788 0.749938 x

x Nb 11 0.399734 0.002233 -0.000681 x

x Nb 12 0.399242 0.000685 0.500523 x

x Nb 13 0.599949 -0.001908 0.250060 x

x Nb 14 0.600204 0.005043 0.749745 x

x Nb 15 0.600254 -0.002315 0.000710 x

x Nb 16 0.600768 -0.000678 0.499468 x

x Nb 17 0.798910 -0.008556 0.250322 x

x Nb 18 0.802094 0.004292 0.749969 x

x Nb 19 0.800380 0.000212 -0.000304 x

x Nb 20 0.799984 -0.001205 0.500077 x

xxxxxxxxxxxxxxxxxxxxxxxxxxxxxxxxxxxxxxxxxxxxxxxxxxxxxxxxxxxx

------------------------------------------------------------------------ <-- SCF

SCF loop Energy Energy gain Timer <-- SCF

per atom (sec) <-- SCF

------------------------------------------------------------------------ <-- SCF

Initial -3.62597530E+004 18255.05 <-- SCF

1 -3.62600512E+004 7.45506482E-003 18282.06 <-- SCF

2 -3.62600681E+004 4.21866851E-004 18311.50 <-- SCF

3 -3.62600847E+004 4.16957695E-004 18338.20 <-- SCF

4 -3.62598405E+004 -6.10603087E-003 18364.22 <-- SCF

5 -3.62598542E+004 3.43336492E-004 18390.78 <-- SCF

6 -3.62598513E+004 -7.38694904E-005 18416.72 <-- SCF

7 -3.62598498E+004 -3.59218002E-005 18438.97 <-- SCF

8 -3.62598499E+004 1.77129611E-006 18458.83 <-- SCF

9 -3.62598501E+004 3.55341819E-006 18477.08 <-- SCF

10 -3.62598502E+004 4.24402291E-006 18494.33 <-- SCF

11 -3.62598504E+004 3.40151864E-006 18511.67 <-- SCF

12 -3.62598505E+004 2.83212612E-006 18528.78 <-- SCF

13 -3.62598506E+004 2.75640373E-006 18545.92 <-- SCF

14 -3.62598506E+004 1.60607856E-006 18563.17 <-- SCF

15 -3.62598507E+004 1.53618910E-006 18579.83 <-- SCF

16 -3.62598508E+004 1.52417149E-006 18596.45 <-- SCF

17 -3.62598508E+004 1.27986542E-006 18612.48 <-- SCF

18 -3.62598509E+004 1.21046568E-006 18628.67 <-- SCF

19 -3.62598509E+004 1.30962362E-006 18645.39 <-- SCF

20 -3.62598510E+004 1.48125446E-006 18662.50 <-- SCF

21 -3.62598510E+004 7.32374032E-007 18678.56 <-- SCF

22 -3.62598510E+004 5.67687342E-007 18694.62 <-- SCF

------------------------------------------------------------------------ <-- SCF

Final energy = -36259.85103068 eV

(energy not corrected for finite basis set)

*********************************** Forces ***********************************

* *

* Cartesian components (eV/A) *

* -------------------------------------------------------------------------- *

* x y z *

* *

* Se 1 -0.00895 0.03866 -0.07008 *

* Se 2 0.03035 0.01450 0.09657 *

* Se 3 0.02509 -0.01806 -0.00978 *

* Se 4 -0.02121 0.00680 0.01803 *

* Se 5 -0.03456 0.02011 -0.02019 *

* Se 6 0.17605 -0.01096 0.03023 *

* Se 7 0.13575 0.03227 0.07255 *

* Se 8 -0.05401 0.04034 -0.02787 *

* Se 9 0.03862 0.03907 -0.04052 *

* Se 10 0.00065 -0.00691 0.03297 *

* Se 11 -0.03847 -0.03711 0.03734 *

* Se 12 0.00023 0.00872 -0.03123 *

* Se 13 -0.13990 -0.02983 -0.06484 *

* Se 14 0.05689 -0.04176 0.02827 *

* Se 15 0.03604 -0.02170 0.02053 *

* Se 16 -0.17358 0.01180 -0.03053 *

* Se 17 -0.02570 0.01718 0.00178 *

* Se 18 0.01972 -0.00609 -0.02025 *

* Se 19 0.00802 -0.03899 0.07171 *

* Se 20 -0.03181 -0.01578 -0.09164 *

* Nb 1 0.13762 -0.02338 0.01366 *

* Nb 2 -0.13660 0.02207 -0.01419 *

* Nb 3 -0.00071 -0.00066 -0.00085 *

* Nb 4 -0.00044 -0.00100 0.00000 *

* Nb 5 -0.00034 -0.03945 -0.00079 *

* Nb 6 -0.00109 0.07805 -0.01914 *

* Nb 7 -0.00708 0.02658 -0.04456 *

* Nb 8 0.01379 0.02266 0.02237 *

* Nb 9 -0.03699 -0.10946 0.03046 *

* Nb 10 0.01536 0.09062 -0.03897 *

* Nb 11 0.02106 -0.00602 -0.02506 *

* Nb 12 -0.03397 -0.01441 0.02405 *

* Nb 13 -0.01414 -0.08946 0.03905 *

* Nb 14 0.03587 0.10801 -0.03029 *

* Nb 15 -0.02192 0.00546 0.02390 *

* Nb 16 0.03363 0.01383 -0.02309 *

* Nb 17 -0.00013 -0.07814 0.01816 *

* Nb 18 0.00053 0.03929 0.00013 *

* Nb 19 0.00907 -0.02547 0.04507 *

* Nb 20 -0.01273 -0.02138 -0.02296 *

* *

******************************************************************************

***************** Stress Tensor *****************

* *

* Cartesian components (GPa) *

* --------------------------------------------- *

* x y z *

* *

* x -0.113768 -0.192536 -0.010318 *

* y -0.192536 -0.024461 0.057038 *

* z -0.010318 0.057038 0.244690 *

* *

* Pressure: -0.0355 *

* *

*************************************************

+------------+-------------+-------------+-----------------+ <-- min BFGS

| Step | lambda | F.delta | enthalpy | <-- min BFGS

+------------+-------------+-------------+-----------------+ <-- min BFGS

| previous | 0.000000 | 0.000088 | -36259.845652 | <-- min BFGS

| trial step | 1.000000 | 0.000065 | -36259.847941 | <-- min BFGS

| line step | 3.899183 | 3.683E-006 | -36259.851099 | <-- min BFGS

+------------+-------------+-------------+-----------------+ <-- min BFGS

BFGS: finished iteration 24 with enthalpy= -3.62598511E+004 eV

+-----------+-----------------+-----------------+------------+-----+ <-- BFGS

| Parameter | value | tolerance | units | OK? | <-- BFGS

+-----------+-----------------+-----------------+------------+-----+ <-- BFGS

| dE/ion | 1.361856E-004 | 5.000000E-006 | eV | No | <-- BFGS

| |F|max | 1.789596E-001 | 1.000000E-002 | eV/A | No | <-- BFGS

| |dR|max | 3.468588E-003 | 5.000000E-004 | A | No | <-- BFGS

| Smax | 2.446899E-001 | 2.000000E-002 | GPa | No | <-- BFGS

+-----------+-----------------+-----------------+------------+-----+ <-- BFGS

================================================================================

Starting BFGS iteration 25 ...

================================================================================

Writing analysis data to 2H-Nb1.1Se2-7-UF.castep_bin

Writing model to 2H-Nb1.1Se2-7-UF.check

+------------+-------------+-------------+-----------------+ <-- min BFGS

| Step | lambda | F.delta | enthalpy | <-- min BFGS

+------------+-------------+-------------+-----------------+ <-- min BFGS

| previous | 0.000000 | 0.000180 | -36259.851099 | <-- min BFGS

+------------+-------------+-------------+-----------------+ <-- min BFGS

--------------------------------------------------------------------------------

BFGS: starting iteration 25 with trial guess (lambda= 1.000000)

--------------------------------------------------------------------------------

-------------------------------

Unit Cell

-------------------------------

Real Lattice(A) Reciprocal Lattice(1/A)

14.9002624 -8.3530210 -0.0064594 0.4199489 -0.0030931 0.0000578

0.0249269 3.3843231 0.0015911 1.0364972 1.8489220 -0.0005304

-0.0018766 0.0050415 13.9075763 0.0000765 -0.0002130 0.4517816

Lattice parameters(A) Cell Angles

a = 17.081886 alpha = 89.952352

b = 3.384415 beta = 90.038566

c = 13.907577 gamma = 118.852804

Current cell volume = 704.217191 A**3

-------------------------------

Cell Contents

-------------------------------

xxxxxxxxxxxxxxxxxxxxxxxxxxxxxxxxxxxxxxxxxxxxxxxxxxxxxxxxxxxx

x Element Atom Fractional coordinates of atoms x

x Number u v w x

x----------------------------------------------------------x

x Se 1 0.067129 0.665012 0.126388 x

x Se 2 0.132213 0.338547 0.627168 x

x Se 3 0.132320 0.339848 0.872365 x

x Se 4 0.067228 0.665559 0.374064 x

x Se 5 0.266944 0.665220 0.125807 x

x Se 6 0.331705 0.336002 0.627077 x

x Se 7 0.332029 0.337827 0.872309 x

x Se 8 0.266778 0.664596 0.373947 x

x Se 9 0.467468 0.657208 0.127887 x

x Se 10 0.532616 0.340408 0.626492 x

x Se 11 0.532528 0.342814 0.872120 x

x Se 12 0.467376 0.659603 0.373508 x

x Se 13 0.667991 0.662263 0.127643 x

x Se 14 0.733215 0.335339 0.626058 x

x Se 15 0.733047 0.334712 0.874194 x

x Se 16 0.668314 0.664079 0.372961 x

x Se 17 0.867666 0.660046 0.127671 x

x Se 18 0.932782 0.334488 0.625948 x

x Se 19 0.932882 0.335054 0.873597 x

x Se 20 0.867776 0.661364 0.372795 x

x Nb 1 0.001017 0.004003 0.249992 x

x Nb 2 -0.001060 -0.003815 0.750007 x

x Nb 3 -0.000012 -0.000159 0.000032 x

x Nb 4 -0.000018 -0.000174 0.499961 x

x Nb 5 0.197857 -0.004818 0.250019 x

x Nb 6 0.201114 0.008941 0.749656 x

x Nb 7 0.199593 -0.000010 0.000212 x

x Nb 8 0.200023 0.001500 0.500014 x

x Nb 9 0.399793 -0.005436 0.250257 x

x Nb 10 0.399998 0.001851 0.749915 x

x Nb 11 0.399749 0.002441 -0.000833 x

x Nb 12 0.399197 0.000715 0.500677 x

x Nb 13 0.599958 -0.001984 0.250082 x

x Nb 14 0.600240 0.005700 0.749734 x

x Nb 15 0.600238 -0.002534 0.000866 x

x Nb 16 0.600814 -0.000705 0.499314 x

x Nb 17 0.798913 -0.009072 0.250353 x

x Nb 18 0.802167 0.004633 0.749984 x

x Nb 19 0.800432 0.000265 -0.000276 x

x Nb 20 0.799981 -0.001332 0.500033 x

xxxxxxxxxxxxxxxxxxxxxxxxxxxxxxxxxxxxxxxxxxxxxxxxxxxxxxxxxxxx

------------------------------------------------------------------------ <-- SCF

SCF loop Energy Energy gain Timer <-- SCF

per atom (sec) <-- SCF

------------------------------------------------------------------------ <-- SCF

Initial -3.62597720E+004 18798.50 <-- SCF

1 -3.62599646E+004 4.81492662E-003 18824.70 <-- SCF

2 -3.62599752E+004 2.63894444E-004 18853.33 <-- SCF

3 -3.62599276E+004 -1.19124975E-003 18879.70 <-- SCF

4 -3.62598554E+004 -1.80445629E-003 18905.56 <-- SCF

5 -3.62598569E+004 3.82829446E-005 18931.70 <-- SCF

6 -3.62598553E+004 -3.89746878E-005 18956.11 <-- SCF

7 -3.62598550E+004 -8.62033441E-006 18976.80 <-- SCF

8 -3.62598551E+004 1.26071866E-006 18996.48 <-- SCF

9 -3.62598551E+004 6.19835139E-007 19013.73 <-- SCF

------------------------------------------------------------------------ <-- SCF

Final energy = -36259.85507593 eV

(energy not corrected for finite basis set)

*********************************** Forces ***********************************

* *

* Cartesian components (eV/A) *

* -------------------------------------------------------------------------- *

* x y z *

* *

* Se 1 0.00325 0.03085 -0.05905 *

* Se 2 -0.00352 0.00119 0.11300 *

* Se 3 -0.00833 -0.02556 -0.02313 *

* Se 4 -0.00371 0.00343 0.00922 *

* Se 5 -0.03243 0.00266 -0.03209 *

* Se 6 0.16700 -0.00541 0.03915 *

* Se 7 0.09764 0.03598 0.07029 *

* Se 8 -0.04547 0.02389 -0.02643 *

* Se 9 0.05128 0.04324 -0.03588 *

* Se 10 -0.00276 -0.03221 0.02934 *

* Se 11 -0.05150 -0.04093 0.03211 *

* Se 12 0.00348 0.03433 -0.02735 *

* Se 13 -0.10263 -0.03402 -0.06132 *

* Se 14 0.04913 -0.02509 0.02733 *

* Se 15 0.03486 -0.00438 0.03198 *

* Se 16 -0.16552 0.00647 -0.04025 *

* Se 17 0.00701 0.02450 0.01551 *

* Se 18 0.00234 -0.00258 -0.01150 *

* Se 19 -0.00455 -0.03195 0.06169 *

* Se 20 0.00295 -0.00250 -0.10712 *

* Nb 1 0.10609 -0.03455 0.01277 *

* Nb 2 -0.10313 0.03160 -0.01362 *

* Nb 3 -0.00052 0.00038 -0.00181 *

* Nb 4 -0.00011 0.00007 0.00090 *

* Nb 5 0.00518 -0.02444 -0.00151 *

* Nb 6 0.02147 0.06856 -0.01583 *

* Nb 7 0.00315 0.03195 -0.04615 *

* Nb 8 0.02254 0.02979 0.02063 *

* Nb 9 -0.03318 -0.09580 0.03810 *

* Nb 10 0.02770 0.10032 -0.04107 *

* Nb 11 0.02399 -0.00741 -0.00780 *

* Nb 12 -0.03440 -0.01919 0.00443 *

* Nb 13 -0.02516 -0.09898 0.04113 *

* Nb 14 0.03127 0.09342 -0.03813 *

* Nb 15 -0.02521 0.00759 0.00532 *

* Nb 16 0.03388 0.01911 -0.00334 *

* Nb 17 -0.02422 -0.06769 0.01438 *

* Nb 18 -0.00546 0.02525 0.00089 *

* Nb 19 -0.00103 -0.03226 0.04793 *

* Nb 20 -0.02136 -0.02963 -0.02275 *

* *

******************************************************************************

***************** Stress Tensor *****************

* *

* Cartesian components (GPa) *

* --------------------------------------------- *

* x y z *

* *

* x -0.069295 -0.133134 -0.011436 *

* y -0.133134 -0.003087 0.108454 *

* z -0.011436 0.108454 0.147152 *

* *

* Pressure: -0.0249 *

* *

*************************************************

+------------+-------------+-------------+-----------------+ <-- min BFGS

| Step | lambda | F.delta | enthalpy | <-- min BFGS

+------------+-------------+-------------+-----------------+ <-- min BFGS

| previous | 0.000000 | 0.000180 | -36259.851099 | <-- min BFGS

| trial step | 1.000000 | 0.000116 | -36259.855132 | <-- min BFGS

+------------+-------------+-------------+-----------------+ <-- min BFGS

--------------------------------------------------------------------------------

BFGS: improving iteration 25 with line minimization (lambda= 2.810042)

--------------------------------------------------------------------------------

-------------------------------

Unit Cell

-------------------------------

Real Lattice(A) Reciprocal Lattice(1/A)

14.8996308 -8.3485456 -0.0072030 0.4197977 -0.0033964 0.0000004

0.0274001 3.3867214 0.0028879 1.0348357 1.8468700 -0.0012406

0.0000636 0.0092963 13.8923319 0.0000025 -0.0003857 0.4522775

Lattice parameters(A) Cell Angles

a = 17.079147 alpha = 89.912803

b = 3.386833 beta = 90.042677

c = 13.892335 gamma = 118.799207

Current cell volume = 704.197040 A**3

-------------------------------

Cell Contents

-------------------------------

xxxxxxxxxxxxxxxxxxxxxxxxxxxxxxxxxxxxxxxxxxxxxxxxxxxxxxxxxxxx

x Element Atom Fractional coordinates of atoms x

x Number u v w x

x----------------------------------------------------------x

x Se 1 0.067103 0.665021 0.126131 x

x Se 2 0.132345 0.339541 0.627187 x

x Se 3 0.132471 0.340962 0.872302 x

x Se 4 0.067184 0.665525 0.374331 x

x Se 5 0.266916 0.665440 0.125617 x

x Se 6 0.331839 0.336724 0.627083 x

x Se 7 0.332213 0.338858 0.872255 x

x Se 8 0.266672 0.664601 0.374052 x

x Se 9 0.467437 0.655944 0.127986 x

x Se 10 0.532664 0.341478 0.626379 x

x Se 11 0.532560 0.344089 0.872019 x

x Se 12 0.467327 0.658541 0.373623 x

x Se 13 0.667809 0.661252 0.127691 x

x Se 14 0.733321 0.335320 0.625953 x

x Se 15 0.733073 0.334477 0.874385 x

x Se 16 0.668184 0.663377 0.372964 x

x Se 17 0.867513 0.658906 0.127737 x

x Se 18 0.932827 0.334529 0.625682 x

x Se 19 0.932909 0.335058 0.873852 x

x Se 20 0.867641 0.660346 0.372770 x

x Nb 1 0.001515 0.005933 0.249986 x

x Nb 2 -0.001565 -0.005716 0.750014 x

x Nb 3 -0.000014 -0.000191 0.000037 x

x Nb 4 -0.000022 -0.000211 0.499954 x

x Nb 5 0.197730 -0.005461 0.249992 x

x Nb 6 0.201111 0.009849 0.749601 x

x Nb 7 0.199505 -0.000057 0.000149 x

x Nb 8 0.200029 0.001761 0.500101 x

x Nb 9 0.399735 -0.006582 0.250275 x

x Nb 10 0.399975 0.001966 0.749873 x

x Nb 11 0.399776 0.002819 -0.001109 x

x Nb 12 0.399116 0.000769 0.500956 x

x Nb 13 0.599973 -0.002122 0.250123 x

x Nb 14 0.600304 0.006890 0.749715 x

x Nb 15 0.600207 -0.002930 0.001147 x

x Nb 16 0.600899 -0.000753 0.499035 x

x Nb 17 0.798918 -0.010006 0.250410 x

x Nb 18 0.802299 0.005249 0.750012 x

x Nb 19 0.800526 0.000363 -0.000223 x

x Nb 20 0.799976 -0.001561 0.499954 x

xxxxxxxxxxxxxxxxxxxxxxxxxxxxxxxxxxxxxxxxxxxxxxxxxxxxxxxxxxxx

------------------------------------------------------------------------ <-- SCF

SCF loop Energy Energy gain Timer <-- SCF

per atom (sec) <-- SCF

------------------------------------------------------------------------ <-- SCF

Initial -3.62595895E+004 19116.73 <-- SCF

1 -3.62601893E+004 1.49944022E-002 19143.28 <-- SCF

2 -3.62602203E+004 7.75869262E-004 19173.14 <-- SCF

3 -3.62600296E+004 -4.76911504E-003 19200.08 <-- SCF

4 -3.62598643E+004 -4.13080133E-003 19226.16 <-- SCF

5 -3.62598630E+004 -3.27852233E-005 19252.69 <-- SCF

6 -3.62598592E+004 -9.62182278E-005 19278.72 <-- SCF

7 -3.62598582E+004 -2.42286559E-005 19302.23 <-- SCF

8 -3.62598584E+004 3.66340225E-006 19322.44 <-- SCF

9 -3.62598584E+004 -3.67346720E-008 19340.75 <-- SCF

10 -3.62598584E+004 5.95115299E-007 19358.28 <-- SCF

------------------------------------------------------------------------ <-- SCF

Final energy = -36259.85838891 eV

(energy not corrected for finite basis set)

*********************************** Forces ***********************************

* *

* Cartesian components (eV/A) *

* -------------------------------------------------------------------------- *

* x y z *

* *

* Se 1 0.02717 0.01601 -0.03144 *

* Se 2 -0.06225 -0.01665 0.14526 *

* Se 3 -0.05585 -0.03359 -0.05253 *

* Se 4 0.03370 0.00900 0.00610 *

* Se 5 -0.02320 -0.02240 -0.04678 *

* Se 6 0.14403 0.00786 0.05795 *

* Se 7 0.03074 0.04178 0.06558 *

* Se 8 -0.02553 -0.00394 -0.02552 *

* Se 9 0.06543 0.04007 -0.03022 *

* Se 10 -0.00091 -0.05940 0.02395 *

* Se 11 -0.06537 -0.03751 0.02628 *

* Se 12 0.00147 0.06249 -0.02160 *

* Se 13 -0.03537 -0.04122 -0.05444 *

* Se 14 0.03031 0.00276 0.02624 *

* Se 15 0.02625 0.02016 0.04660 *

* Se 16 -0.14559 -0.00647 -0.06113 *

* Se 17 0.05243 0.03323 0.04587 *

* Se 18 -0.03486 -0.00743 -0.00797 *

* Se 19 -0.02886 -0.01738 0.03455 *

* Se 20 0.06225 0.01450 -0.13815 *

* Nb 1 0.05689 -0.05172 0.01054 *

* Nb 2 -0.05203 0.04647 -0.01188 *

* Nb 3 -0.00034 0.00159 -0.00307 *

* Nb 4 0.00029 0.00121 0.00184 *

* Nb 5 0.00375 0.00079 -0.00449 *

* Nb 6 0.05703 0.05117 -0.01151 *

* Nb 7 0.01807 0.04195 -0.05023 *

* Nb 8 0.03808 0.03828 0.01791 *

* Nb 9 -0.03266 -0.07740 0.04594 *

* Nb 10 0.05048 0.11543 -0.04268 *

* Nb 11 0.03117 -0.01651 0.02564 *

* Nb 12 -0.03546 -0.03109 -0.03250 *

* Nb 13 -0.04545 -0.11363 0.04277 *

* Nb 14 0.02975 0.07380 -0.04631 *

* Nb 15 -0.03193 0.01714 -0.02860 *

* Nb 16 0.03468 0.03135 0.03377 *

* Nb 17 -0.06139 -0.04900 0.00938 *

* Nb 18 -0.00443 0.00163 0.00345 *

* Nb 19 -0.01604 -0.04383 0.05326 *

* Nb 20 -0.03646 -0.03948 -0.02183 *

* *

******************************************************************************

***************** Stress Tensor *****************

* *

* Cartesian components (GPa) *

* --------------------------------------------- *

* x y z *

* *

* x -0.003872 -0.028125 0.028360 *

* y -0.028125 0.039821 0.202864 *

* z 0.028360 0.202864 -0.012083 *

* *

* Pressure: -0.0080 *

* *

*************************************************

+------------+-------------+-------------+-----------------+ <-- min BFGS

| Step | lambda | F.delta | enthalpy | <-- min BFGS

+------------+-------------+-------------+-----------------+ <-- min BFGS

| previous | 0.000000 | 0.000180 | -36259.851099 | <-- min BFGS

| trial step | 1.000000 | 0.000116 | -36259.855132 | <-- min BFGS

| line step | 2.810042 | 0.000012 | -36259.858451 | <-- min BFGS

+------------+-------------+-------------+-----------------+ <-- min BFGS

BFGS: finished iteration 25 with enthalpy= -3.62598585E+004 eV

+-----------+-----------------+-----------------+------------+-----+ <-- BFGS

| Parameter | value | tolerance | units | OK? | <-- BFGS

+-----------+-----------------+-----------------+------------+-----+ <-- BFGS

| dE/ion | 1.837952E-004 | 5.000000E-006 | eV | No | <-- BFGS

| |F|max | 1.589114E-001 | 1.000000E-002 | eV/A | No | <-- BFGS

| |dR|max | 1.225933E-002 | 5.000000E-004 | A | No | <-- BFGS

| Smax | 2.028636E-001 | 2.000000E-002 | GPa | No | <-- BFGS

+-----------+-----------------+-----------------+------------+-----+ <-- BFGS

================================================================================

Starting BFGS iteration 26 ...

================================================================================

+------------+-------------+-------------+-----------------+ <-- min BFGS

| Step | lambda | F.delta | enthalpy | <-- min BFGS

+------------+-------------+-------------+-----------------+ <-- min BFGS

| previous | 0.000000 | 0.000048 | -36259.858451 | <-- min BFGS

+------------+-------------+-------------+-----------------+ <-- min BFGS

--------------------------------------------------------------------------------

BFGS: starting iteration 26 with trial guess (lambda= 1.000000)

--------------------------------------------------------------------------------

-------------------------------

Unit Cell

-------------------------------

Real Lattice(A) Reciprocal Lattice(1/A)

14.9020015 -8.3421867 -0.0063506 0.4196730 -0.0035025 0.0000036

0.0282556 3.3856576 0.0024913 1.0340650 1.8471950 -0.0010627

-0.0000531 0.0080225 13.8929301 0.0000064 -0.0003328 0.4522579

Lattice parameters(A) Cell Angles

a = 17.078108 alpha = 89.924759

b = 3.385776 beta = 90.037658

c = 13.892932 gamma = 118.762084

Current cell volume = 704.215488 A**3

-------------------------------

Cell Contents

-------------------------------

xxxxxxxxxxxxxxxxxxxxxxxxxxxxxxxxxxxxxxxxxxxxxxxxxxxxxxxxxxxx

x Element Atom Fractional coordinates of atoms x

x Number u v w x

x----------------------------------------------------------x

x Se 1 0.067110 0.665051 0.126142 x

x Se 2 0.132347 0.339848 0.627313 x

x Se 3 0.132481 0.341341 0.872161 x

x Se 4 0.067191 0.665567 0.374330 x

x Se 5 0.266916 0.665443 0.125614 x

x Se 6 0.331847 0.336954 0.627204 x

x Se 7 0.332234 0.339208 0.872117 x

x Se 8 0.266649 0.664540 0.374014 x

x Se 9 0.467431 0.655385 0.128132 x

x Se 10 0.532685 0.341928 0.626439 x

x Se 11 0.532566 0.344653 0.871874 x

x Se 12 0.467306 0.658095 0.373563 x

x Se 13 0.667789 0.660909 0.127828 x

x Se 14 0.733343 0.335376 0.625992 x

x Se 15 0.733072 0.334468 0.874387 x

x Se 16 0.668178 0.663155 0.372845 x

x Se 17 0.867501 0.658518 0.127878 x

x Se 18 0.932821 0.334491 0.625684 x

x Se 19 0.932903 0.335033 0.873841 x

x Se 20 0.867638 0.660031 0.372642 x

x Nb 1 0.001681 0.006559 0.249982 x

x Nb 2 -0.001734 -0.006330 0.750017 x

x Nb 3 -0.000015 -0.000203 0.000038 x

x Nb 4 -0.000024 -0.000225 0.499951 x

x Nb 5 0.197645 -0.005738 0.249983 x

x Nb 6 0.201140 0.010327 0.749579 x

x Nb 7 0.199471 -0.000054 0.000134 x

x Nb 8 0.200035 0.001891 0.500126 x

x Nb 9 0.399717 -0.007028 0.250289 x

x Nb 10 0.399965 0.002070 0.749859 x

x Nb 11 0.399780 0.002983 -0.001201 x

x Nb 12 0.399072 0.000784 0.501044 x

x Nb 13 0.599980 -0.002236 0.250136 x

x Nb 14 0.600324 0.007354 0.749700 x

x Nb 15 0.600202 -0.003100 0.001241 x

x Nb 16 0.600944 -0.000766 0.498948 x

x Nb 17 0.798891 -0.010495 0.250433 x

x Nb 18 0.802386 0.005514 0.750021 x

x Nb 19 0.800562 0.000379 -0.000213 x

x Nb 20 0.799971 -0.001678 0.499932 x

xxxxxxxxxxxxxxxxxxxxxxxxxxxxxxxxxxxxxxxxxxxxxxxxxxxxxxxxxxxx

------------------------------------------------------------------------ <-- SCF

SCF loop Energy Energy gain Timer <-- SCF

per atom (sec) <-- SCF

------------------------------------------------------------------------ <-- SCF

Initial -3.62598169E+004 19460.88 <-- SCF

1 -3.62599692E+004 3.80621700E-003 19488.23 <-- SCF

2 -3.62599778E+004 2.15255377E-004 19516.23 <-- SCF

3 -3.62599527E+004 -6.26507865E-004 19543.02 <-- SCF

4 -3.62598561E+004 -2.41585203E-003 19569.02 <-- SCF

5 -3.62598617E+004 1.41129546E-004 19595.78 <-- SCF

6 -3.62598600E+004 -4.32751722E-005 19620.47 <-- SCF

7 -3.62598593E+004 -1.70064271E-005 19641.89 <-- SCF

8 -3.62598594E+004 7.05799747E-007 19661.14 <-- SCF

9 -3.62598594E+004 9.97391589E-007 19679.23 <-- SCF

------------------------------------------------------------------------ <-- SCF

Final energy = -36259.85939397 eV

(energy not corrected for finite basis set)

*********************************** Forces ***********************************

* *

* Cartesian components (eV/A) *

* -------------------------------------------------------------------------- *

* x y z *

* *

* Se 1 0.02755 0.01560 -0.04085 *

* Se 2 -0.07374 -0.01017 0.12262 *

* Se 3 -0.05786 -0.03444 -0.03424 *

* Se 4 0.03568 0.00886 0.01696 *

* Se 5 -0.02423 -0.02488 -0.05200 *

* Se 6 0.14534 0.01647 0.04567 *

* Se 7 0.02361 0.04382 0.09956 *

* Se 8 -0.02340 -0.00482 -0.02227 *

* Se 9 0.06758 0.03765 -0.05791 *

* Se 10 -0.01972 -0.05436 0.02342 *

* Se 11 -0.06727 -0.03542 0.05393 *

* Se 12 0.02028 0.05803 -0.02087 *

* Se 13 -0.02770 -0.04540 -0.08760 *

* Se 14 0.02862 0.00394 0.02290 *

* Se 15 0.02774 0.02264 0.05163 *

* Se 16 -0.14856 -0.01447 -0.05151 *

* Se 17 0.05431 0.03560 0.02860 *

* Se 18 -0.03708 -0.00716 -0.01928 *

* Se 19 -0.02952 -0.01706 0.04410 *

* Se 20 0.07368 0.00774 -0.11266 *

* Nb 1 0.04265 -0.05397 0.01327 *

* Nb 2 -0.03751 0.04774 -0.01488 *

* Nb 3 -0.00026 0.00187 -0.00347 *

* Nb 4 0.00034 0.00147 0.00209 *

* Nb 5 0.00354 0.00618 -0.00312 *

* Nb 6 0.06370 0.04338 -0.01207 *

* Nb 7 0.02009 0.04402 -0.05272 *

* Nb 8 0.03795 0.03951 0.01949 *

* Nb 9 -0.04001 -0.07139 0.04948 *

* Nb 10 0.05425 0.12116 -0.04319 *

* Nb 11 0.03235 -0.02008 0.03181 *

* Nb 12 -0.03743 -0.03688 -0.04150 *

* Nb 13 -0.04827 -0.11909 0.04326 *

* Nb 14 0.03669 0.06723 -0.04978 *

* Nb 15 -0.03279 0.02094 -0.03535 *

* Nb 16 0.03687 0.03713 0.04275 *

* Nb 17 -0.06837 -0.04071 0.00966 *

* Nb 18 -0.00456 -0.00315 0.00195 *

* Nb 19 -0.01820 -0.04634 0.05618 *

* Nb 20 -0.03632 -0.04116 -0.02404 *

* *

******************************************************************************

***************** Stress Tensor *****************

* *

* Cartesian components (GPa) *

* --------------------------------------------- *

* x y z *

* *

* x 0.047183 -0.003595 0.026779 *

* y -0.003595 -0.010763 0.178414 *

* z 0.026779 0.178414 -0.030583 *

* *

* Pressure: -0.0019 *

* *

*************************************************

+------------+-------------+-------------+-----------------+ <-- min BFGS

| Step | lambda | F.delta | enthalpy | <-- min BFGS

+------------+-------------+-------------+-----------------+ <-- min BFGS

| previous | 0.000000 | 0.000048 | -36259.858451 | <-- min BFGS

| trial step | 1.000000 | 0.000020 | -36259.859476 | <-- min BFGS

+------------+-------------+-------------+-----------------+ <-- min BFGS

--------------------------------------------------------------------------------

BFGS: improving iteration 26 with line minimization (lambda= 1.718794)

--------------------------------------------------------------------------------

-------------------------------

Unit Cell

-------------------------------

Real Lattice(A) Reciprocal Lattice(1/A)

14.9037055 -8.3376159 -0.0057378 0.4195834 -0.0035787 0.0000060

0.0288705 3.3848930 0.0022062 1.0335113 1.8474290 -0.0009348

-0.0001370 0.0071070 13.8933600 0.0000092 -0.0002948 0.4522439

Lattice parameters(A) Cell Angles

a = 17.077362 alpha = 89.933355

b = 3.385017 beta = 90.034053

c = 13.893362 gamma = 118.735394

Current cell volume = 704.228602 A**3

-------------------------------

Cell Contents

-------------------------------

xxxxxxxxxxxxxxxxxxxxxxxxxxxxxxxxxxxxxxxxxxxxxxxxxxxxxxxxxxxx

x Element Atom Fractional coordinates of atoms x

x Number u v w x

x----------------------------------------------------------x

x Se 1 0.067115 0.665072 0.126149 x

x Se 2 0.132348 0.340068 0.627404 x

x Se 3 0.132488 0.341613 0.872061 x

x Se 4 0.067196 0.665597 0.374329 x

x Se 5 0.266917 0.665445 0.125613 x

x Se 6 0.331853 0.337119 0.627292 x

x Se 7 0.332249 0.339460 0.872017 x

x Se 8 0.266633 0.664495 0.373987 x

x Se 9 0.467426 0.654983 0.128236 x

x Se 10 0.532700 0.342251 0.626482 x

x Se 11 0.532570 0.345058 0.871769 x

x Se 12 0.467290 0.657774 0.373521 x

x Se 13 0.667774 0.660662 0.127926 x

x Se 14 0.733359 0.335417 0.626019 x

x Se 15 0.733071 0.334461 0.874389 x

x Se 16 0.668173 0.662995 0.372760 x

x Se 17 0.867493 0.658238 0.127980 x

x Se 18 0.932816 0.334464 0.625685 x

x Se 19 0.932898 0.335016 0.873832 x

x Se 20 0.867636 0.659803 0.372550 x

x Nb 1 0.001800 0.007008 0.249980 x

x Nb 2 -0.001855 -0.006771 0.750019 x

x Nb 3 -0.000016 -0.000211 0.000040 x

x Nb 4 -0.000025 -0.000235 0.499949 x

x Nb 5 0.197584 -0.005936 0.249977 x

x Nb 6 0.201160 0.010670 0.749563 x

x Nb 7 0.199447 -0.000051 0.000123 x

x Nb 8 0.200038 0.001984 0.500144 x

x Nb 9 0.399704 -0.007349 0.250299 x

x Nb 10 0.399958 0.002146 0.749849 x

x Nb 11 0.399783 0.003100 -0.001267 x

x Nb 12 0.399040 0.000796 0.501106 x

x Nb 13 0.599986 -0.002317 0.250146 x

x Nb 14 0.600339 0.007687 0.749690 x

x Nb 15 0.600198 -0.003223 0.001308 x

x Nb 16 0.600977 -0.000776 0.498885 x

x Nb 17 0.798871 -0.010846 0.250449 x

x Nb 18 0.802448 0.005705 0.750027 x

x Nb 19 0.800588 0.000390 -0.000206 x

x Nb 20 0.799968 -0.001762 0.499917 x

xxxxxxxxxxxxxxxxxxxxxxxxxxxxxxxxxxxxxxxxxxxxxxxxxxxxxxxxxxxx

------------------------------------------------------------------------ <-- SCF

SCF loop Energy Energy gain Timer <-- SCF

per atom (sec) <-- SCF

------------------------------------------------------------------------ <-- SCF

Initial -3.62598382E+004 19782.31 <-- SCF

1 -3.62598949E+004 1.41544819E-003 19808.91 <-- SCF

2 -3.62598977E+004 7.16157205E-005 19836.17 <-- SCF

3 -3.62598798E+004 -4.47079361E-004 19862.34 <-- SCF

4 -3.62598599E+004 -4.97440619E-004 19887.84 <-- SCF

5 -3.62598599E+004 7.43745245E-008 19912.80 <-- SCF

6 -3.62598597E+004 -7.10279555E-006 19932.45 <-- SCF

7 -3.62598597E+004 -1.04262803E-008 19951.25 <-- SCF

8 -3.62598597E+004 7.38566289E-007 19968.67 <-- SCF

------------------------------------------------------------------------ <-- SCF

Final energy = -36259.85968232 eV

(energy not corrected for finite basis set)

*********************************** Forces ***********************************

* *

* Cartesian components (eV/A) *

* -------------------------------------------------------------------------- *

* x y z *

* *

* Se 1 0.03094 0.01555 -0.04853 *

* Se 2 -0.07838 -0.00554 0.10143 *

* Se 3 -0.05782 -0.03848 -0.01981 *

* Se 4 0.04011 0.00875 0.02379 *

* Se 5 -0.02140 -0.02619 -0.05762 *

* Se 6 0.14825 0.02381 0.03391 *

* Se 7 0.02229 0.04051 0.12765 *

* Se 8 -0.01787 -0.00560 -0.01923 *

* Se 9 0.06955 0.04539 -0.08539 *

* Se 10 -0.03553 -0.05037 0.02283 *

* Se 11 -0.06923 -0.04370 0.08156 *

* Se 12 0.03591 0.05433 -0.02022 *

* Se 13 -0.02623 -0.04404 -0.11506 *

* Se 14 0.02324 0.00499 0.01972 *

* Se 15 0.02502 0.02393 0.05732 *

* Se 16 -0.15266 -0.02137 -0.04172 *

* Se 17 0.05486 0.04096 0.01431 *

* Se 18 -0.04143 -0.00691 -0.02626 *

* Se 19 -0.03280 -0.01706 0.05192 *

* Se 20 0.07805 0.00315 -0.09006 *

* Nb 1 0.03193 -0.05673 0.01177 *

* Nb 2 -0.02640 0.05006 -0.01342 *

* Nb 3 -0.00020 0.00194 -0.00367 *

* Nb 4 0.00041 0.00158 0.00212 *

* Nb 5 0.00622 0.00971 -0.00490 *

* Nb 6 0.07150 0.03798 -0.01014 *

* Nb 7 0.02362 0.04500 -0.05466 *

* Nb 8 0.04348 0.04121 0.02197 *

* Nb 9 -0.04210 -0.06902 0.04988 *

* Nb 10 0.05860 0.12326 -0.04198 *

* Nb 11 0.03605 -0.02089 0.03647 *

* Nb 12 -0.03830 -0.03949 -0.04583 *

* Nb 13 -0.05251 -0.12114 0.04217 *

* Nb 14 0.03896 0.06476 -0.05029 *

* Nb 15 -0.03650 0.02184 -0.04012 *

* Nb 16 0.03763 0.03982 0.04721 *

* Nb 17 -0.07644 -0.03493 0.00764 *

* Nb 18 -0.00727 -0.00643 0.00365 *

* Nb 19 -0.02165 -0.04754 0.05825 *

* Nb 20 -0.04188 -0.04307 -0.02666 *

* *

******************************************************************************

***************** Stress Tensor *****************

* *

* Cartesian components (GPa) *

* --------------------------------------------- *

* x y z *

* *

* x 0.081463 0.014273 0.025019 *

* y 0.014273 -0.049087 0.163558 *

* z 0.025019 0.163558 -0.041522 *

* *

* Pressure: 0.0030 *

* *

*************************************************

+------------+-------------+-------------+-----------------+ <-- min BFGS

| Step | lambda | F.delta | enthalpy | <-- min BFGS

+------------+-------------+-------------+-----------------+ <-- min BFGS

| previous | 0.000000 | 0.000048 | -36259.858451 | <-- min BFGS

| trial step | 1.000000 | 0.000020 | -36259.859476 | <-- min BFGS

| line step | 1.718794 | -4.679E-006 | -36259.859762 | <-- min BFGS

+------------+-------------+-------------+-----------------+ <-- min BFGS

BFGS: finished iteration 26 with enthalpy= -3.62598598E+004 eV

+-----------+-----------------+-----------------+------------+-----+ <-- BFGS

| Parameter | value | tolerance | units | OK? | <-- BFGS

+-----------+-----------------+-----------------+------------+-----+ <-- BFGS

| dE/ion | 3.277221E-005 | 5.000000E-006 | eV | No | <-- BFGS

| |F|max | 1.596980E-001 | 1.000000E-002 | eV/A | No | <-- BFGS

| |dR|max | 4.719845E-003 | 5.000000E-004 | A | No | <-- BFGS

| Smax | 1.635583E-001 | 2.000000E-002 | GPa | No | <-- BFGS

+-----------+-----------------+-----------------+------------+-----+ <-- BFGS

================================================================================

Starting BFGS iteration 27 ...

================================================================================

+------------+-------------+-------------+-----------------+ <-- min BFGS

| Step | lambda | F.delta | enthalpy | <-- min BFGS

+------------+-------------+-------------+-----------------+ <-- min BFGS

| previous | 0.000000 | 0.000039 | -36259.859762 | <-- min BFGS

+------------+-------------+-------------+-----------------+ <-- min BFGS

--------------------------------------------------------------------------------

BFGS: starting iteration 27 with trial guess (lambda= 1.000000)

--------------------------------------------------------------------------------

-------------------------------

Unit Cell

-------------------------------

Real Lattice(A) Reciprocal Lattice(1/A)

14.9016267 -8.3358473 -0.0042276 0.4196082 -0.0036397 0.0000055

0.0293618 3.3850132 0.0016100 1.0333165 1.8472147 -0.0006778

-0.0001383 0.0051751 13.8930673 0.0000079 -0.0002152 0.4522534

Lattice parameters(A) Cell Angles

a = 17.074684 alpha = 89.951414

b = 3.385141 beta = 90.025103

c = 13.893068 gamma = 118.725319

Current cell volume = 704.197208 A**3

-------------------------------

Cell Contents

-------------------------------

xxxxxxxxxxxxxxxxxxxxxxxxxxxxxxxxxxxxxxxxxxxxxxxxxxxxxxxxxxxx

x Element Atom Fractional coordinates of atoms x

x Number u v w x

x----------------------------------------------------------x

x Se 1 0.067113 0.665082 0.126124 x

x Se 2 0.132353 0.340014 0.627399 x

x Se 3 0.132493 0.341523 0.872089 x

x Se 4 0.067192 0.665588 0.374345 x

x Se 5 0.266907 0.665442 0.125603 x

x Se 6 0.331894 0.337178 0.627266 x

x Se 7 0.332269 0.339469 0.872079 x

x Se 8 0.266625 0.664513 0.373989 x

x Se 9 0.467438 0.655162 0.128186 x

x Se 10 0.532692 0.342123 0.626468 x

x Se 11 0.532559 0.344880 0.871818 x

x Se 12 0.467298 0.657905 0.373535 x

x Se 13 0.667753 0.660649 0.127867 x

x Se 14 0.733368 0.335401 0.626017 x

x Se 15 0.733081 0.334465 0.874399 x

x Se 16 0.668131 0.662936 0.372785 x

x Se 17 0.867487 0.658329 0.127949 x

x Se 18 0.932819 0.334472 0.625669 x

x Se 19 0.932900 0.335003 0.873859 x

x Se 20 0.867631 0.659857 0.372557 x

x Nb 1 0.001790 0.006912 0.249984 x

x Nb 2 -0.001844 -0.006679 0.750015 x

x Nb 3 -0.000016 -0.000208 0.000039 x

x Nb 4 -0.000025 -0.000232 0.499950 x

x Nb 5 0.197611 -0.005884 0.249977 x

x Nb 6 0.201156 0.010626 0.749564 x

x Nb 7 0.199456 -0.000015 0.000110 x

x Nb 8 0.200044 0.002003 0.500147 x

x Nb 9 0.399700 -0.007365 0.250306 x

x Nb 10 0.399969 0.002238 0.749839 x

x Nb 11 0.399790 0.003070 -0.001249 x

x Nb 12 0.399045 0.000755 0.501090 x

x Nb 13 0.599975 -0.002404 0.250157 x

x Nb 14 0.600343 0.007696 0.749683 x

x Nb 15 0.600191 -0.003192 0.001290 x

x Nb 16 0.600972 -0.000736 0.498902 x

x Nb 17 0.798875 -0.010800 0.250447 x

x Nb 18 0.802421 0.005656 0.750027 x

x Nb 19 0.800579 0.000350 -0.000191 x

x Nb 20 0.799963 -0.001784 0.499912 x

xxxxxxxxxxxxxxxxxxxxxxxxxxxxxxxxxxxxxxxxxxxxxxxxxxxxxxxxxxxx

------------------------------------------------------------------------ <-- SCF

SCF loop Energy Energy gain Timer <-- SCF

per atom (sec) <-- SCF

------------------------------------------------------------------------ <-- SCF

Initial -3.62598575E+004 20071.83 <-- SCF

1 -3.62598649E+004 1.85950099E-004 20098.78 <-- SCF

2 -3.62598653E+004 9.62391764E-006 20121.03 <-- SCF

3 -3.62598631E+004 -5.38409966E-005 20147.20 <-- SCF

4 -3.62598607E+004 -6.05279514E-005 20171.94 <-- SCF

5 -3.62598607E+004 -6.17686032E-007 20192.12 <-- SCF

6 -3.62598607E+004 -7.24190749E-007 20209.53 <-- SCF

------------------------------------------------------------------------ <-- SCF

Final energy = -36259.86067342 eV

(energy not corrected for finite basis set)

*********************************** Forces ***********************************

* *

* Cartesian components (eV/A) *

* -------------------------------------------------------------------------- *

* x y z *

* *

* Se 1 0.03224 0.01117 -0.04095 *

* Se 2 -0.08046 0.00175 0.09882 *

* Se 3 -0.06123 -0.02850 -0.02718 *

* Se 4 0.04272 0.00644 0.02555 *

* Se 5 -0.01731 -0.02845 -0.05487 *

* Se 6 0.13210 0.02878 0.03903 *

* Se 7 0.01362 0.04748 0.10849 *

* Se 8 -0.01516 -0.01029 -0.01948 *

* Se 9 0.06406 0.03237 -0.06700 *

* Se 10 -0.02780 -0.04288 0.02229 *

* Se 11 -0.06407 -0.03059 0.06335 *

* Se 12 0.02795 0.04669 -0.01955 *

* Se 13 -0.01692 -0.05019 -0.09681 *

* Se 14 0.02002 0.00966 0.02011 *

* Se 15 0.02063 0.02612 0.05451 *

* Se 16 -0.13718 -0.02658 -0.04638 *

* Se 17 0.05832 0.03063 0.02213 *

* Se 18 -0.04356 -0.00469 -0.02778 *

* Se 19 -0.03356 -0.01258 0.04416 *

* Se 20 0.08028 -0.00388 -0.08842 *

* Nb 1 0.02489 -0.05660 0.01486 *

* Nb 2 -0.01859 0.04951 -0.01653 *

* Nb 3 -0.00008 0.00219 -0.00424 *

* Nb 4 0.00075 0.00188 0.00281 *

* Nb 5 0.01729 0.01116 -0.00247 *

* Nb 6 0.06645 0.03318 -0.01230 *

* Nb 7 0.02443 0.04518 -0.05831 *

* Nb 8 0.04483 0.04104 0.02050 *

* Nb 9 -0.04502 -0.06491 0.05465 *

* Nb 10 0.06799 0.12081 -0.04430 *

* Nb 11 0.04179 -0.02298 0.04030 *

* Nb 12 -0.03628 -0.04340 -0.05105 *

* Nb 13 -0.06162 -0.11877 0.04474 *

* Nb 14 0.04122 0.06047 -0.05495 *

* Nb 15 -0.04266 0.02388 -0.04429 *

* Nb 16 0.03530 0.04370 0.05270 *

* Nb 17 -0.07203 -0.02994 0.00985 *

* Nb 18 -0.01811 -0.00761 0.00122 *

* Nb 19 -0.02216 -0.04802 0.06221 *

* Nb 20 -0.04307 -0.04325 -0.02542 *

* *

******************************************************************************

***************** Stress Tensor *****************

* *

* Cartesian components (GPa) *

* --------------------------------------------- *

* x y z *

* *

* x 0.077260 0.041130 0.024874 *

* y 0.041130 -0.047967 0.124202 *

* z 0.024874 0.124202 -0.038343 *

* *

* Pressure: 0.0030 *

* *

*************************************************

+------------+-------------+-------------+-----------------+ <-- min BFGS

| Step | lambda | F.delta | enthalpy | <-- min BFGS

+------------+-------------+-------------+-----------------+ <-- min BFGS

| previous | 0.000000 | 0.000039 | -36259.859762 | <-- min BFGS

| trial step | 1.000000 | 0.000032 | -36259.860768 | <-- min BFGS

+------------+-------------+-------------+-----------------+ <-- min BFGS

--------------------------------------------------------------------------------

BFGS: improving iteration 27 with line minimization (lambda= 5.369487)

--------------------------------------------------------------------------------

-------------------------------

Unit Cell

-------------------------------

Real Lattice(A) Reciprocal Lattice(1/A)

14.8925435 -8.3281194 0.0023710 0.4197170 -0.0039062 0.0000034

0.0315086 3.3855388 -0.0009952 1.0324659 1.8462805 0.0004448

-0.0001436 -0.0032661 13.8917883 0.0000023 0.0001329 0.4522950

Lattice parameters(A) Cell Angles

a = 17.062984 alpha = 90.030318

b = 3.385686 beta = 89.985981

c = 13.891789 gamma = 118.681308

Current cell volume = 704.059269 A**3

-------------------------------

Cell Contents

-------------------------------

xxxxxxxxxxxxxxxxxxxxxxxxxxxxxxxxxxxxxxxxxxxxxxxxxxxxxxxxxxxx

x Element Atom Fractional coordinates of atoms x

x Number u v w x

x----------------------------------------------------------x

x Se 1 0.067102 0.665127 0.126012 x

x Se 2 0.132376 0.339778 0.627379 x

x Se 3 0.132517 0.341131 0.872213 x

x Se 4 0.067176 0.665552 0.374412 x

x Se 5 0.266864 0.665429 0.125560 x

x Se 6 0.332075 0.337432 0.627151 x

x Se 7 0.332357 0.339508 0.872350 x

x Se 8 0.266589 0.664593 0.373999 x

x Se 9 0.467491 0.655946 0.127969 x

x Se 10 0.532659 0.341561 0.626407 x

x Se 11 0.532506 0.344102 0.872031 x

x Se 12 0.467333 0.658477 0.373599 x

x Se 13 0.667661 0.660595 0.127610 x

x Se 14 0.733408 0.335331 0.626007 x

x Se 15 0.733127 0.334481 0.874442 x

x Se 16 0.667948 0.662678 0.372893 x

x Se 17 0.867462 0.658725 0.127816 x

x Se 18 0.932834 0.334508 0.625599 x

x Se 19 0.932909 0.334948 0.873974 x

x Se 20 0.867609 0.660091 0.372588 x

x Nb 1 0.001744 0.006492 0.250003 x

x Nb 2 -0.001792 -0.006279 0.749995 x

x Nb 3 -0.000015 -0.000195 0.000034 x

x Nb 4 -0.000023 -0.000218 0.499954 x

x Nb 5 0.197726 -0.005654 0.249979 x

x Nb 6 0.201138 0.010436 0.749569 x

x Nb 7 0.199495 0.000145 0.000050 x

x Nb 8 0.200067 0.002086 0.500161 x

x Nb 9 0.399679 -0.007437 0.250340 x

x Nb 10 0.400021 0.002642 0.749795 x

x Nb 11 0.399821 0.002941 -0.001173 x

x Nb 12 0.399065 0.000576 0.501018 x

x Nb 13 0.599930 -0.002786 0.250200 x

x Nb 14 0.600359 0.007734 0.749649 x

x Nb 15 0.600161 -0.003057 0.001208 x

x Nb 16 0.600950 -0.000559 0.498975 x

x Nb 17 0.798888 -0.010600 0.250440 x

x Nb 18 0.802304 0.005445 0.750024 x

x Nb 19 0.800539 0.000173 -0.000124 x

x Nb 20 0.799940 -0.001878 0.499891 x

xxxxxxxxxxxxxxxxxxxxxxxxxxxxxxxxxxxxxxxxxxxxxxxxxxxxxxxxxxxx

------------------------------------------------------------------------ <-- SCF

SCF loop Energy Energy gain Timer <-- SCF

per atom (sec) <-- SCF

------------------------------------------------------------------------ <-- SCF

Initial -3.62597993E+004 20312.50 <-- SCF

1 -3.62600742E+004 6.87213355E-003 20339.88 <-- SCF

2 -3.62600913E+004 4.27543357E-004 20367.88 <-- SCF

3 -3.62600802E+004 -2.77509286E-004 20394.47 <-- SCF

4 -3.62598530E+004 -5.67982930E-003 20420.47 <-- SCF

5 -3.62598675E+004 3.64204491E-004 20447.28 <-- SCF

6 -3.62598644E+004 -7.82884925E-005 20473.12 <-- SCF

7 -3.62598623E+004 -5.25862912E-005 20496.11 <-- SCF

8 -3.62598621E+004 -3.82342553E-006 20516.22 <-- SCF

9 -3.62598622E+004 1.57636321E-006 20534.12 <-- SCF

10 -3.62598623E+004 1.41006585E-006 20551.52 <-- SCF

11 -3.62598623E+004 1.04550753E-006 20568.55 <-- SCF

12 -3.62598623E+004 6.28482768E-007 20584.73 <-- SCF

------------------------------------------------------------------------ <-- SCF

Final energy = -36259.86232718 eV

(energy not corrected for finite basis set)

*********************************** Forces ***********************************

* *

* Cartesian components (eV/A) *

* -------------------------------------------------------------------------- *

* x y z *

* *

* Se 1 0.03810 -0.00662 -0.01089 *

* Se 2 -0.07712 0.02336 0.09955 *

* Se 3 -0.07178 -0.00052 -0.05374 *

* Se 4 0.05169 -0.00462 0.02171 *

* Se 5 -0.00343 -0.03561 -0.05064 *

* Se 6 0.06359 0.04781 0.06564 *

* Se 7 -0.02284 0.06495 0.02662 *

* Se 8 -0.00622 -0.02817 -0.02136 *

* Se 9 0.04828 0.00410 -0.01166 *

* Se 10 -0.00087 -0.02243 0.01609 *

* Se 11 -0.04715 -0.00202 0.00876 *

* Se 12 0.00184 0.02542 -0.01299 *

* Se 13 0.02138 -0.06490 -0.02001 *

* Se 14 0.00889 0.02782 0.02142 *

* Se 15 0.00532 0.03313 0.05108 *

* Se 16 -0.07096 -0.04665 -0.07118 *

* Se 17 0.06937 0.00120 0.05086 *

* Se 18 -0.05168 0.00629 -0.02321 *

* Se 19 -0.03859 0.00603 0.01255 *

* Se 20 0.07747 -0.02402 -0.09316 *

* Nb 1 0.03041 -0.02567 -0.00493 *

* Nb 2 -0.02882 0.02123 0.00375 *

* Nb 3 -0.00007 0.00033 -0.00239 *

* Nb 4 0.00075 0.00035 0.00142 *

* Nb 5 -0.01358 0.02650 -0.01464 *

* Nb 6 0.09232 0.01588 -0.00702 *

* Nb 7 0.01492 0.03620 -0.04126 *

* Nb 8 0.04702 0.03947 0.02414 *

* Nb 9 -0.03050 -0.03257 0.02979 *

* Nb 10 0.05181 0.08289 -0.00365 *

* Nb 11 0.03584 -0.00774 0.03333 *

* Nb 12 -0.04400 -0.03542 -0.04881 *

* Nb 13 -0.04895 -0.08108 0.00457 *

* Nb 14 0.02840 0.03005 -0.03019 *

* Nb 15 -0.03574 0.00742 -0.03562 *

* Nb 16 0.04391 0.03463 0.04990 *

* Nb 17 -0.09330 -0.01448 0.00555 *

* Nb 18 0.01405 -0.02493 0.01404 *

* Nb 19 -0.01371 -0.03726 0.04348 *

* Nb 20 -0.04606 -0.04038 -0.02689 *

* *

******************************************************************************

***************** Stress Tensor *****************

* *

* Cartesian components (GPa) *

* --------------------------------------------- *

* x y z *

* *

* x 0.043989 0.167033 0.029694 *

* y 0.167033 -0.047532 -0.045317 *

* z 0.029694 -0.045317 -0.054584 *

* *

* Pressure: 0.0194 *

* *

*************************************************

+------------+-------------+-------------+-----------------+ <-- min BFGS

| Step | lambda | F.delta | enthalpy | <-- min BFGS

+------------+-------------+-------------+-----------------+ <-- min BFGS

| previous | 0.000000 | 0.000039 | -36259.859762 | <-- min BFGS

| trial step | 1.000000 | 0.000032 | -36259.860768 | <-- min BFGS

| line step | 5.369487 | -4.797E-006 | -36259.862423 | <-- min BFGS

+------------+-------------+-------------+-----------------+ <-- min BFGS

BFGS: finished iteration 27 with enthalpy= -3.62598624E+004 eV

+-----------+-----------------+-----------------+------------+-----+ <-- BFGS

| Parameter | value | tolerance | units | OK? | <-- BFGS

+-----------+-----------------+-----------------+------------+-----+ <-- BFGS

| dE/ion | 6.651201E-005 | 5.000000E-006 | eV | No | <-- BFGS

| |F|max | 1.280730E-001 | 1.000000E-002 | eV/A | No | <-- BFGS

| |dR|max | 4.949592E-003 | 5.000000E-004 | A | No | <-- BFGS

| Smax | 1.670328E-001 | 2.000000E-002 | GPa | No | <-- BFGS

+-----------+-----------------+-----------------+------------+-----+ <-- BFGS

================================================================================

Starting BFGS iteration 28 ...

================================================================================

+------------+-------------+-------------+-----------------+ <-- min BFGS

| Step | lambda | F.delta | enthalpy | <-- min BFGS

+------------+-------------+-------------+-----------------+ <-- min BFGS

| previous | 0.000000 | 0.000097 | -36259.862423 | <-- min BFGS

+------------+-------------+-------------+-----------------+ <-- min BFGS

--------------------------------------------------------------------------------

BFGS: starting iteration 28 with trial guess (lambda= 1.000000)

--------------------------------------------------------------------------------

-------------------------------

Unit Cell

-------------------------------

Real Lattice(A) Reciprocal Lattice(1/A)

14.8878183 -8.3306264 0.0042977 0.4198559 -0.0038949 0.0000291

0.0314142 3.3863575 -0.0022109 1.0328688 1.8458597 0.0010330

-0.0010295 -0.0072001 13.8949448 0.0000345 0.0002949 0.4521923

Lattice parameters(A) Cell Angles

a = 17.060085 alpha = 90.067133

b = 3.386504 beta = 89.974773

c = 13.894947 gamma = 118.698131

Current cell volume = 704.156309 A**3

-------------------------------

Cell Contents

-------------------------------

xxxxxxxxxxxxxxxxxxxxxxxxxxxxxxxxxxxxxxxxxxxxxxxxxxxxxxxxxxxx

x Element Atom Fractional coordinates of atoms x

x Number u v w x

x----------------------------------------------------------x

x Se 1 0.067144 0.665352 0.125921 x

x Se 2 0.132297 0.339978 0.627500 x

x Se 3 0.132452 0.341442 0.872088 x

x Se 4 0.067231 0.665840 0.374518 x

x Se 5 0.266885 0.665338 0.125381 x

x Se 6 0.332060 0.337720 0.627277 x

x Se 7 0.332337 0.339933 0.872236 x

x Se 8 0.266588 0.664450 0.374095 x

x Se 9 0.467479 0.655160 0.128061 x

x Se 10 0.532710 0.342175 0.626398 x

x Se 11 0.532518 0.344895 0.871937 x

x Se 12 0.467281 0.657871 0.373609 x

x Se 13 0.667681 0.660175 0.127724 x

x Se 14 0.733409 0.335469 0.625912 x

x Se 15 0.733105 0.334564 0.874621 x

x Se 16 0.667964 0.662400 0.372768 x

x Se 17 0.867525 0.658400 0.127943 x

x Se 18 0.932780 0.334226 0.625494 x

x Se 19 0.932868 0.334728 0.874065 x

x Se 20 0.867687 0.659877 0.372467 x

x Nb 1 0.001958 0.007252 0.249994 x

x Nb 2 -0.002009 -0.007024 0.750003 x

x Nb 3 -0.000017 -0.000211 0.000036 x

x Nb 4 -0.000025 -0.000236 0.499950 x

x Nb 5 0.197568 -0.006041 0.249962 x

x Nb 6 0.201225 0.011256 0.749537 x

x Nb 7 0.199453 0.000210 0.000028 x

x Nb 8 0.200085 0.002345 0.500194 x

x Nb 9 0.399648 -0.008084 0.250372 x

x Nb 10 0.400010 0.002928 0.749778 x

x Nb 11 0.399828 0.003180 -0.001280 x

x Nb 12 0.398982 0.000521 0.501108 x

x Nb 13 0.599938 -0.003079 0.250217 x

x Nb 14 0.600392 0.008404 0.749616 x

x Nb 15 0.600152 -0.003305 0.001318 x

x Nb 16 0.601034 -0.000502 0.498885 x

x Nb 17 0.798802 -0.011438 0.250471 x

x Nb 18 0.802464 0.005815 0.750041 x

x Nb 19 0.800586 0.000135 -0.000108 x

x Nb 20 0.799923 -0.002119 0.499862 x

xxxxxxxxxxxxxxxxxxxxxxxxxxxxxxxxxxxxxxxxxxxxxxxxxxxxxxxxxxxx

------------------------------------------------------------------------ <-- SCF

SCF loop Energy Energy gain Timer <-- SCF

per atom (sec) <-- SCF

------------------------------------------------------------------------ <-- SCF

Initial -3.62597885E+004 20687.94 <-- SCF

1 -3.62599701E+004 4.53978280E-003 20714.42 <-- SCF

2 -3.62599794E+004 2.31975924E-004 20742.80 <-- SCF

3 -3.62599239E+004 -1.38593936E-003 20769.77 <-- SCF

4 -3.62598665E+004 -1.43540544E-003 20795.92 <-- SCF

5 -3.62598667E+004 4.76987242E-006 20822.50 <-- SCF

6 -3.62598648E+004 -4.86929702E-005 20847.14 <-- SCF

7 -3.62598645E+004 -7.56971212E-006 20867.81 <-- SCF

8 -3.62598645E+004 5.92648790E-007 20886.14 <-- SCF

9 -3.62598645E+004 6.16670101E-007 20903.28 <-- SCF

------------------------------------------------------------------------ <-- SCF

Final energy = -36259.86451164 eV

(energy not corrected for finite basis set)

*********************************** Forces ***********************************

* *

* Cartesian components (eV/A) *

* -------------------------------------------------------------------------- *

* x y z *

* *

* Se 1 0.02136 -0.00819 -0.00973 *

* Se 2 -0.05485 0.01756 0.07422 *

* Se 3 -0.05092 -0.01924 -0.04047 *

* Se 4 0.03968 0.00183 0.03339 *

* Se 5 -0.01008 -0.03332 -0.04686 *

* Se 6 0.08259 0.04789 0.05245 *

* Se 7 0.00151 0.05280 0.05579 *

* Se 8 -0.02213 -0.02225 -0.02258 *

* Se 9 0.04682 0.01740 -0.02008 *

* Se 10 -0.00780 -0.03261 0.00933 *

* Se 11 -0.04569 -0.01638 0.01789 *

* Se 12 0.00812 0.03607 -0.00599 *

* Se 13 -0.00318 -0.05505 -0.04781 *

* Se 14 0.02533 0.02145 0.02310 *

* Se 15 0.01236 0.03031 0.04699 *

* Se 16 -0.09053 -0.04621 -0.05974 *

* Se 17 0.04960 0.02114 0.03744 *

* Se 18 -0.03998 0.00010 -0.03532 *

* Se 19 -0.02204 0.00815 0.01061 *

* Se 20 0.05501 -0.01783 -0.06739 *

* Nb 1 0.03693 -0.03130 -0.00491 *

* Nb 2 -0.03400 0.02552 0.00362 *

* Nb 3 -0.00013 0.00097 -0.00288 *

* Nb 4 0.00105 0.00119 0.00220 *

* Nb 5 0.01228 0.01977 -0.01566 *

* Nb 6 0.07576 0.01210 -0.00355 *

* Nb 7 0.01785 0.03712 -0.04932 *

* Nb 8 0.04785 0.04137 0.03022 *

* Nb 9 -0.03207 -0.02756 0.02685 *

* Nb 10 0.05208 0.09450 -0.00031 *

* Nb 11 0.03815 -0.01095 0.03890 *

* Nb 12 -0.04215 -0.04371 -0.05147 *

* Nb 13 -0.04792 -0.09245 0.00147 *

* Nb 14 0.02912 0.02424 -0.02719 *

* Nb 15 -0.03788 0.01116 -0.04173 *

* Nb 16 0.04195 0.04353 0.05264 *

* Nb 17 -0.07812 -0.00987 0.00213 *

* Nb 18 -0.01220 -0.01732 0.01506 *

* Nb 19 -0.01675 -0.03896 0.05259 *

* Nb 20 -0.04696 -0.04297 -0.03389 *

* *

******************************************************************************

***************** Stress Tensor *****************

* *

* Cartesian components (GPa) *

* --------------------------------------------- *

* x y z *

* *

* x -0.010847 0.151594 0.020786 *

* y 0.151594 0.034639 -0.118911 *

* z 0.020786 -0.118911 -0.001826 *

* *

* Pressure: -0.0073 *

* *

*************************************************

+------------+-------------+-------------+-----------------+ <-- min BFGS

| Step | lambda | F.delta | enthalpy | <-- min BFGS

+------------+-------------+-------------+-----------------+ <-- min BFGS

| previous | 0.000000 | 0.000097 | -36259.862423 | <-- min BFGS

| trial step | 1.000000 | 0.000050 | -36259.864595 | <-- min BFGS

+------------+-------------+-------------+-----------------+ <-- min BFGS

--------------------------------------------------------------------------------

BFGS: improving iteration 28 with line minimization (lambda= 2.044302)

--------------------------------------------------------------------------------

-------------------------------

Unit Cell

-------------------------------

Real Lattice(A) Reciprocal Lattice(1/A)

14.8828837 -8.3332444 0.0063098 0.4200011 -0.0038829 0.0000559

0.0313156 3.3872126 -0.0034803 1.0332899 1.8454209 0.0016468

-0.0019547 -0.0113083 13.8982410 0.0000681 0.0004639 0.4520853

Lattice parameters(A) Cell Angles

a = 17.057058 alpha = 90.105559

b = 3.387359 beta = 89.963060

c = 13.898246 gamma = 118.715704

Current cell volume = 704.257338 A**3

-------------------------------

Cell Contents

-------------------------------

xxxxxxxxxxxxxxxxxxxxxxxxxxxxxxxxxxxxxxxxxxxxxxxxxxxxxxxxxxxx

x Element Atom Fractional coordinates of atoms x

x Number u v w x

x----------------------------------------------------------x

x Se 1 0.067187 0.665586 0.125826 x

x Se 2 0.132214 0.340187 0.627627 x

x Se 3 0.132383 0.341767 0.871957 x

x Se 4 0.067288 0.666140 0.374628 x

x Se 5 0.266908 0.665242 0.125193 x

x Se 6 0.332044 0.338020 0.627409 x

x Se 7 0.332317 0.340377 0.872116 x

x Se 8 0.266588 0.664302 0.374195 x

x Se 9 0.467466 0.654339 0.128157 x

x Se 10 0.532763 0.342816 0.626388 x

x Se 11 0.532531 0.345722 0.871840 x

x Se 12 0.467227 0.657238 0.373620 x

x Se 13 0.667703 0.659736 0.127844 x

x Se 14 0.733411 0.335613 0.625813 x

x Se 15 0.733083 0.334650 0.874809 x

x Se 16 0.667980 0.662110 0.372638 x

x Se 17 0.867591 0.658061 0.128074 x

x Se 18 0.932723 0.333933 0.625383 x

x Se 19 0.932825 0.334497 0.874160 x

x Se 20 0.867768 0.659654 0.372340 x

x Nb 1 0.002181 0.008045 0.249984 x

x Nb 2 -0.002235 -0.007801 0.750012 x

x Nb 3 -0.000018 -0.000228 0.000038 x

x Nb 4 -0.000028 -0.000255 0.499947 x

x Nb 5 0.197404 -0.006445 0.249944 x

x Nb 6 0.201316 0.012114 0.749504 x

x Nb 7 0.199408 0.000278 0.000005 x

x Nb 8 0.200104 0.002616 0.500228 x

x Nb 9 0.399617 -0.008760 0.250406 x

x Nb 10 0.399999 0.003227 0.749760 x

x Nb 11 0.399836 0.003429 -0.001392 x

x Nb 12 0.398895 0.000465 0.501201 x

x Nb 13 0.599946 -0.003385 0.250235 x

x Nb 14 0.600427 0.009103 0.749581 x

x Nb 15 0.600142 -0.003564 0.001432 x

x Nb 16 0.601123 -0.000444 0.498792 x

x Nb 17 0.798712 -0.012312 0.250505 x

x Nb 18 0.802631 0.006202 0.750058 x

x Nb 19 0.800634 0.000096 -0.000091 x

x Nb 20 0.799906 -0.002371 0.499832 x

xxxxxxxxxxxxxxxxxxxxxxxxxxxxxxxxxxxxxxxxxxxxxxxxxxxxxxxxxxxx

------------------------------------------------------------------------ <-- SCF

SCF loop Energy Energy gain Timer <-- SCF

per atom (sec) <-- SCF

------------------------------------------------------------------------ <-- SCF

Initial -3.62597812E+004 21006.22 <-- SCF

1 -3.62600288E+004 6.19139100E-003 21033.20 <-- SCF

2 -3.62600419E+004 3.26052170E-004 21061.67 <-- SCF

3 -3.62599975E+004 -1.10848391E-003 21088.81 <-- SCF

4 -3.62598635E+004 -3.35131619E-003 21115.11 <-- SCF

5 -3.62598694E+004 1.47130693E-004 21142.03 <-- SCF

6 -3.62598662E+004 -7.87746535E-005 21167.30 <-- SCF

7 -3.62598654E+004 -2.10218242E-005 21188.67 <-- SCF

8 -3.62598654E+004 -8.44663737E-007 21208.73 <-- SCF

9 -3.62598654E+004 6.64812336E-007 21226.75 <-- SCF

------------------------------------------------------------------------ <-- SCF

Final energy = -36259.86538196 eV

(energy not corrected for finite basis set)

*********************************** Forces ***********************************

* *

* Cartesian components (eV/A) *

* -------------------------------------------------------------------------- *

* x y z *

* *

* Se 1 0.00679 -0.00707 -0.01276 *

* Se 2 -0.03076 0.01053 0.04656 *

* Se 3 -0.03345 -0.04022 -0.03109 *

* Se 4 0.02849 0.01051 0.04498 *

* Se 5 -0.01822 -0.03168 -0.03237 *

* Se 6 0.10142 0.05151 0.03342 *

* Se 7 0.02306 0.03108 0.09310 *

* Se 8 -0.03658 -0.01897 -0.02328 *

* Se 9 0.03904 0.04897 -0.03899 *

* Se 10 -0.01276 -0.03965 -0.00169 *

* Se 11 -0.03718 -0.04959 0.03788 *

* Se 12 0.01305 0.04370 0.00534 *

* Se 13 -0.02518 -0.03613 -0.08377 *

* Se 14 0.03976 0.01775 0.02421 *

* Se 15 0.02031 0.02844 0.03257 *

* Se 16 -0.11014 -0.04949 -0.04273 *

* Se 17 0.03350 0.04348 0.02789 *

* Se 18 -0.02875 -0.00817 -0.04716 *

* Se 19 -0.00719 0.00793 0.01260 *

* Se 20 0.03056 -0.00992 -0.04035 *

* Nb 1 0.04631 -0.03624 -0.00448 *

* Nb 2 -0.04323 0.02962 0.00316 *

* Nb 3 -0.00021 0.00126 -0.00318 *

* Nb 4 0.00123 0.00163 0.00271 *

* Nb 5 0.03448 0.01370 -0.01682 *

* Nb 6 0.05894 0.00873 -0.00122 *

* Nb 7 0.01888 0.03705 -0.05695 *

* Nb 8 0.04908 0.04128 0.03492 *

* Nb 9 -0.03286 -0.02439 0.02526 *

* Nb 10 0.05175 0.10587 0.00382 *

* Nb 11 0.04049 -0.01458 0.04521 *

* Nb 12 -0.04237 -0.05245 -0.05630 *

* Nb 13 -0.04689 -0.10331 -0.00232 *

* Nb 14 0.02907 0.02064 -0.02548 *

* Nb 15 -0.03991 0.01489 -0.04837 *

* Nb 16 0.04207 0.05234 0.05766 *

* Nb 17 -0.06145 -0.00591 -0.00013 *

* Nb 18 -0.03450 -0.01059 0.01636 *

* Nb 19 -0.01829 -0.03926 0.06079 *

* Nb 20 -0.04833 -0.04331 -0.03901 *

* *

******************************************************************************

***************** Stress Tensor *****************

* *

* Cartesian components (GPa) *

* --------------------------------------------- *

* x y z *

* *

* x -0.070354 0.130741 0.010500 *

* y 0.130741 0.118769 -0.193573 *

* z 0.010500 -0.193573 0.041859 *

* *

* Pressure: -0.0301 *

* *

*************************************************

+------------+-------------+-------------+-----------------+ <-- min BFGS

| Step | lambda | F.delta | enthalpy | <-- min BFGS

+------------+-------------+-------------+-----------------+ <-- min BFGS

| previous | 0.000000 | 0.000097 | -36259.862423 | <-- min BFGS

| trial step | 1.000000 | 0.000050 | -36259.864595 | <-- min BFGS

| line step | 2.044302 | -4.051E-006 | -36259.865430 | <-- min BFGS

+------------+-------------+-------------+-----------------+ <-- min BFGS

BFGS: finished iteration 28 with enthalpy= -3.62598654E+004 eV

+-----------+-----------------+-----------------+------------+-----+ <-- BFGS

| Parameter | value | tolerance | units | OK? | <-- BFGS

+-----------+-----------------+-----------------+------------+-----+ <-- BFGS

| dE/ion | 7.519312E-005 | 5.000000E-006 | eV | No | <-- BFGS

| |F|max | 1.280877E-001 | 1.000000E-002 | eV/A | No | <-- BFGS

| |dR|max | 6.803661E-003 | 5.000000E-004 | A | No | <-- BFGS

| Smax | 1.935731E-001 | 2.000000E-002 | GPa | No | <-- BFGS

+-----------+-----------------+-----------------+------------+-----+ <-- BFGS

================================================================================

Starting BFGS iteration 29 ...

================================================================================

+------------+-------------+-------------+-----------------+ <-- min BFGS

| Step | lambda | F.delta | enthalpy | <-- min BFGS

+------------+-------------+-------------+-----------------+ <-- min BFGS

| previous | 0.000000 | 0.000035 | -36259.865430 | <-- min BFGS

+------------+-------------+-------------+-----------------+ <-- min BFGS

--------------------------------------------------------------------------------

BFGS: starting iteration 29 with trial guess (lambda= 1.000000)

--------------------------------------------------------------------------------

-------------------------------

Unit Cell

-------------------------------

Real Lattice(A) Reciprocal Lattice(1/A)

14.8818137 -8.3319666 0.0061669 0.4200393 -0.0038693 0.0000683

0.0311962 3.3865015 -0.0036377 1.0334424 1.8458436 0.0017458

-0.0023685 -0.0118198 13.8991372 0.0000841 0.0004848 0.4520562

Lattice parameters(A) Cell Angles

a = 17.055500 alpha = 90.110354

b = 3.386647 beta = 89.964000

c = 13.899142 gamma = 118.715623

Current cell volume = 704.090845 A**3

-------------------------------

Cell Contents

-------------------------------

xxxxxxxxxxxxxxxxxxxxxxxxxxxxxxxxxxxxxxxxxxxxxxxxxxxxxxxxxxxx

x Element Atom Fractional coordinates of atoms x

x Number u v w x

x----------------------------------------------------------x

x Se 1 0.067196 0.665677 0.125754 x

x Se 2 0.132190 0.340123 0.627616 x

x Se 3 0.132361 0.341686 0.871985 x

x Se 4 0.067304 0.666249 0.374701 x

x Se 5 0.266906 0.665193 0.125099 x

x Se 6 0.332073 0.338109 0.627389 x

x Se 7 0.332322 0.340433 0.872177 x

x Se 8 0.266585 0.664268 0.374263 x

x Se 9 0.467468 0.654357 0.128095 x

x Se 10 0.532776 0.342811 0.626339 x

x Se 11 0.532529 0.345707 0.871901 x

x Se 12 0.467214 0.657247 0.373671 x

x Se 13 0.667697 0.659676 0.127786 x

x Se 14 0.733415 0.335648 0.625745 x

x Se 15 0.733086 0.334698 0.874902 x

x Se 16 0.667950 0.662020 0.372657 x

x Se 17 0.867612 0.658142 0.128045 x

x Se 18 0.932707 0.333826 0.625310 x

x Se 19 0.932816 0.334405 0.874233 x

x Se 20 0.867792 0.659715 0.372353 x

x Nb 1 0.002206 0.008070 0.249984 x

x Nb 2 -0.002260 -0.007828 0.750012 x

x Nb 3 -0.000018 -0.000228 0.000037 x

x Nb 4 -0.000028 -0.000255 0.499947 x

x Nb 5 0.197395 -0.006452 0.249939 x

x Nb 6 0.201337 0.012243 0.749500 x

x Nb 7 0.199409 0.000338 -0.000013 x

x Nb 8 0.200115 0.002705 0.500237 x

x Nb 9 0.399608 -0.008882 0.250420 x

x Nb 10 0.400006 0.003396 0.749752 x

x Nb 11 0.399845 0.003450 -0.001387 x

x Nb 12 0.398879 0.000394 0.501192 x

x Nb 13 0.599939 -0.003549 0.250243 x

x Nb 14 0.600435 0.009220 0.749567 x

x Nb 15 0.600133 -0.003585 0.001427 x

x Nb 16 0.601139 -0.000373 0.498801 x

x Nb 17 0.798691 -0.012442 0.250507 x

x Nb 18 0.802640 0.006210 0.750063 x

x Nb 19 0.800634 0.000037 -0.000072 x

x Nb 20 0.799895 -0.002459 0.499821 x

xxxxxxxxxxxxxxxxxxxxxxxxxxxxxxxxxxxxxxxxxxxxxxxxxxxxxxxxxxxx

------------------------------------------------------------------------ <-- SCF

SCF loop Energy Energy gain Timer <-- SCF

per atom (sec) <-- SCF

------------------------------------------------------------------------ <-- SCF

Initial -3.62598608E+004 21329.77 <-- SCF

1 -3.62598835E+004 5.67892535E-004 21357.27 <-- SCF

2 -3.62598847E+004 3.15973428E-005 21381.67 <-- SCF

3 -3.62598810E+004 -9.36124164E-005 21408.30 <-- SCF

4 -3.62598661E+004 -3.71764875E-004 21434.44 <-- SCF

5 -3.62598666E+004 1.05342676E-005 21457.30 <-- SCF

6 -3.62598664E+004 -2.81891810E-006 21475.72 <-- SCF

7 -3.62598664E+004 -1.29465860E-007 21493.44 <-- SCF

8 -3.62598665E+004 6.84464898E-007 21509.86 <-- SCF

------------------------------------------------------------------------ <-- SCF

Final energy = -36259.86646034 eV

(energy not corrected for finite basis set)

*********************************** Forces ***********************************

* *

* Cartesian components (eV/A) *

* -------------------------------------------------------------------------- *

* x y z *

* *

* Se 1 0.00990 -0.00831 -0.00727 *

* Se 2 -0.02397 0.01178 0.05063 *

* Se 3 -0.02925 -0.03617 -0.03874 *

* Se 4 0.03062 0.01444 0.04227 *

* Se 5 -0.00996 -0.03218 -0.02054 *

* Se 6 0.09381 0.05379 0.04122 *

* Se 7 0.02496 0.03415 0.07557 *

* Se 8 -0.03155 -0.02016 -0.02722 *

* Se 9 0.03703 0.04249 -0.01825 *

* Se 10 -0.00415 -0.03909 -0.00817 *

* Se 11 -0.03582 -0.04324 0.01752 *

* Se 12 0.00343 0.04293 0.01189 *

* Se 13 -0.02673 -0.03870 -0.06723 *

* Se 14 0.03485 0.01856 0.02852 *

* Se 15 0.01212 0.02884 0.02044 *

* Se 16 -0.10212 -0.05224 -0.05010 *

* Se 17 0.02981 0.03907 0.03597 *

* Se 18 -0.03091 -0.01227 -0.04494 *

* Se 19 -0.01016 0.00942 0.00677 *

* Se 20 0.02424 -0.01094 -0.04501 *

* Nb 1 0.05350 -0.03521 -0.00796 *

* Nb 2 -0.04987 0.02830 0.00675 *

* Nb 3 -0.00037 0.00167 -0.00333 *

* Nb 4 0.00128 0.00209 0.00293 *

* Nb 5 0.03205 0.01202 -0.01956 *

* Nb 6 0.06284 0.00561 -0.00062 *

* Nb 7 0.01924 0.03534 -0.05689 *

* Nb 8 0.05315 0.04084 0.03638 *

* Nb 9 -0.02843 -0.02014 0.02144 *

* Nb 10 0.05365 0.10311 0.01228 *

* Nb 11 0.04416 -0.01204 0.04468 *

* Nb 12 -0.04590 -0.05383 -0.05562 *

* Nb 13 -0.04876 -0.10082 -0.01073 *

* Nb 14 0.02472 0.01646 -0.02169 *

* Nb 15 -0.04395 0.01269 -0.04773 *

* Nb 16 0.04529 0.05427 0.05719 *

* Nb 17 -0.06595 -0.00261 -0.00051 *

* Nb 18 -0.03218 -0.00877 0.01927 *

* Nb 19 -0.01834 -0.03777 0.06109 *

* Nb 20 -0.05229 -0.04336 -0.04070 *

* *

******************************************************************************

***************** Stress Tensor *****************

* *

* Cartesian components (GPa) *

* --------------------------------------------- *

* x y z *

* *

* x -0.085234 0.113504 0.004908 *

* y 0.113504 0.070492 -0.202437 *

* z 0.004908 -0.202437 0.027090 *

* *

* Pressure: -0.0041 *

* *

*************************************************

+------------+-------------+-------------+-----------------+ <-- min BFGS

| Step | lambda | F.delta | enthalpy | <-- min BFGS

+------------+-------------+-------------+-----------------+ <-- min BFGS

| previous | 0.000000 | 0.000035 | -36259.865430 | <-- min BFGS

| trial step | 1.000000 | 0.000028 | -36259.866497 | <-- min BFGS

+------------+-------------+-------------+-----------------+ <-- min BFGS

--------------------------------------------------------------------------------

BFGS: improving iteration 29 with line minimization (lambda= 5.117153)

--------------------------------------------------------------------------------

-------------------------------

Unit Cell

-------------------------------

Real Lattice(A) Reciprocal Lattice(1/A)

14.8774084 -8.3267058 0.0055785 0.4201965 -0.0038130 0.0001193

0.0307045 3.3835738 -0.0042854 1.0340708 1.8475861 0.0021535

-0.0040722 -0.0139255 13.9028270 0.0001501 0.0005710 0.4519364

Lattice parameters(A) Cell Angles

a = 17.049086 alpha = 90.130104

b = 3.383716 beta = 89.967869

c = 13.902835 gamma = 118.715292

Current cell volume = 703.405310 A**3

-------------------------------

Cell Contents

-------------------------------

xxxxxxxxxxxxxxxxxxxxxxxxxxxxxxxxxxxxxxxxxxxxxxxxxxxxxxxxxxxx

x Element Atom Fractional coordinates of atoms x

x Number u v w x

x----------------------------------------------------------x

x Se 1 0.067236 0.666051 0.125456 x

x Se 2 0.132091 0.339859 0.627572 x

x Se 3 0.132271 0.341351 0.872099 x

x Se 4 0.067368 0.666695 0.375001 x

x Se 5 0.266898 0.664990 0.124713 x

x Se 6 0.332191 0.338475 0.627303 x

x Se 7 0.332342 0.340663 0.872428 x

x Se 8 0.266574 0.664128 0.374542 x

x Se 9 0.467478 0.654431 0.127839 x

x Se 10 0.532830 0.342793 0.626134 x

x Se 11 0.532521 0.345643 0.872152 x

x Se 12 0.467161 0.657285 0.373879 x

x Se 13 0.667673 0.659430 0.127549 x

x Se 14 0.733430 0.335793 0.625467 x

x Se 15 0.733096 0.334894 0.875289 x

x Se 16 0.667828 0.661651 0.372736 x

x Se 17 0.867699 0.658474 0.127924 x

x Se 18 0.932642 0.333388 0.625007 x

x Se 19 0.932775 0.334028 0.874533 x

x Se 20 0.867890 0.659968 0.372408 x

x Nb 1 0.002312 0.008171 0.249983 x

x Nb 2 -0.002363 -0.007940 0.750011 x

x Nb 3 -0.000019 -0.000228 0.000033 x

x Nb 4 -0.000028 -0.000254 0.499949 x

x Nb 5 0.197360 -0.006483 0.249918 x

x Nb 6 0.201420 0.012775 0.749486 x

x Nb 7 0.199415 0.000586 -0.000086 x

x Nb 8 0.200163 0.003069 0.500278 x

x Nb 9 0.399572 -0.009382 0.250478 x

x Nb 10 0.400037 0.004091 0.749720 x

x Nb 11 0.399883 0.003537 -0.001369 x

x Nb 12 0.398814 0.000103 0.501155 x

x Nb 13 0.599912 -0.004225 0.250276 x

x Nb 14 0.600469 0.009704 0.749508 x

x Nb 15 0.600095 -0.003673 0.001405 x

x Nb 16 0.601203 -0.000084 0.498840 x

x Nb 17 0.798605 -0.012977 0.250519 x

x Nb 18 0.802675 0.006247 0.750083 x

x Nb 19 0.800631 -0.000207 0.000003 x

x Nb 20 0.799849 -0.002821 0.499776 x

xxxxxxxxxxxxxxxxxxxxxxxxxxxxxxxxxxxxxxxxxxxxxxxxxxxxxxxxxxxx

------------------------------------------------------------------------ <-- SCF

SCF loop Energy Energy gain Timer <-- SCF

per atom (sec) <-- SCF

------------------------------------------------------------------------ <-- SCF

Initial -3.62597759E+004 21613.17 <-- SCF

1 -3.62601314E+004 8.88880531E-003 21640.14 <-- SCF

2 -3.62601492E+004 4.43828848E-004 21668.80 <-- SCF

3 -3.62600838E+004 -1.63531166E-003 21694.91 <-- SCF

4 -3.62598648E+004 -5.47423773E-003 21720.73 <-- SCF

5 -3.62598696E+004 1.19672925E-004 21746.80 <-- SCF

6 -3.62598680E+004 -3.94814970E-005 21770.97 <-- SCF

7 -3.62598678E+004 -5.27421801E-006 21793.38 <-- SCF

8 -3.62598679E+004 2.21941178E-006 21811.56 <-- SCF

9 -3.62598679E+004 5.27776031E-007 21829.08 <-- SCF

10 -3.62598679E+004 2.42225325E-007 21845.98 <-- SCF

------------------------------------------------------------------------ <-- SCF

Final energy = -36259.86791397 eV

(energy not corrected for finite basis set)

*********************************** Forces ***********************************

* *

* Cartesian components (eV/A) *

* -------------------------------------------------------------------------- *

* x y z *

* *

* Se 1 0.01400 0.00330 0.00249 *

* Se 2 0.00058 0.01112 0.07414 *

* Se 3 -0.02017 -0.03093 -0.07797 *

* Se 4 0.03011 0.02571 0.01603 *

* Se 5 -0.00977 -0.02763 0.04490 *

* Se 6 0.04063 0.06061 0.07481 *

* Se 7 0.00608 0.03247 -0.01834 *

* Se 8 -0.02501 -0.02714 -0.04783 *

* Se 9 0.03307 0.02874 0.07236 *

* Se 10 0.02893 -0.04156 -0.02098 *

* Se 11 -0.03208 -0.02932 -0.07210 *

* Se 12 -0.02999 0.04453 0.02350 *

* Se 13 -0.00746 -0.03520 0.02134 *

* Se 14 0.02712 0.02449 0.04918 *

* Se 15 0.01153 0.02500 -0.04460 *

* Se 16 -0.04750 -0.06031 -0.08045 *

* Se 17 0.02207 0.03269 0.07654 *

* Se 18 -0.03057 -0.02433 -0.01979 *

* Se 19 -0.01405 -0.00144 -0.00379 *

* Se 20 0.00042 -0.00898 -0.07144 *

* Nb 1 0.06816 -0.02323 -0.01123 *

* Nb 2 -0.06552 0.01674 0.01057 *

* Nb 3 -0.00038 0.00185 -0.00282 *

* Nb 4 0.00150 0.00251 0.00305 *

* Nb 5 0.02829 0.00324 -0.01868 *

* Nb 6 0.05439 -0.00875 -0.00113 *

* Nb 7 0.00817 0.02441 -0.05711 *

* Nb 8 0.04985 0.03426 0.04534 *

* Nb 9 -0.03171 0.00287 0.00692 *

* Nb 10 0.05854 0.08352 0.03306 *

* Nb 11 0.04297 -0.00912 0.04245 *

* Nb 12 -0.04515 -0.05223 -0.04723 *

* Nb 13 -0.05462 -0.08158 -0.03106 *

* Nb 14 0.02804 -0.00602 -0.00711 *

* Nb 15 -0.04222 0.00986 -0.04490 *

* Nb 16 0.04485 0.05314 0.04913 *

* Nb 17 -0.05664 0.01154 0.00130 *

* Nb 18 -0.02845 -0.00032 0.01898 *

* Nb 19 -0.00821 -0.02722 0.06174 *

* Nb 20 -0.04979 -0.03728 -0.04926 *

* *

******************************************************************************

***************** Stress Tensor *****************

* *

* Cartesian components (GPa) *

* --------------------------------------------- *

* x y z *

* *

* x -0.185368 0.094653 -0.019577 *

* y 0.094653 -0.124102 -0.245495 *

* z -0.019577 -0.245495 -0.035024 *

* *

* Pressure: 0.1148 *

* *

*************************************************

+------------+-------------+-------------+-----------------+ <-- min BFGS

| Step | lambda | F.delta | enthalpy | <-- min BFGS

+------------+-------------+-------------+-----------------+ <-- min BFGS

| previous | 0.000000 | 0.000035 | -36259.865430 | <-- min BFGS

| trial step | 1.000000 | 0.000028 | -36259.866497 | <-- min BFGS

| line step | 5.117153 | -7.473E-006 | -36259.867938 | <-- min BFGS

+------------+-------------+-------------+-----------------+ <-- min BFGS

BFGS: finished iteration 29 with enthalpy= -3.62598679E+004 eV

+-----------+-----------------+-----------------+------------+-----+ <-- BFGS

| Parameter | value | tolerance | units | OK? | <-- BFGS

+-----------+-----------------+-----------------+------------+-----+ <-- BFGS

| dE/ion | 6.267986E-005 | 5.000000E-006 | eV | No | <-- BFGS

| |F|max | 1.112000E-001 | 1.000000E-002 | eV/A | No | <-- BFGS

| |dR|max | 6.721801E-003 | 5.000000E-004 | A | No | <-- BFGS

| Smax | 2.454951E-001 | 2.000000E-002 | GPa | No | <-- BFGS

+-----------+-----------------+-----------------+------------+-----+ <-- BFGS

================================================================================

Starting BFGS iteration 30 ...

================================================================================

Writing analysis data to 2H-Nb1.1Se2-7-UF.castep_bin

Writing model to 2H-Nb1.1Se2-7-UF.check

+------------+-------------+-------------+-----------------+ <-- min BFGS

| Step | lambda | F.delta | enthalpy | <-- min BFGS

+------------+-------------+-------------+-----------------+ <-- min BFGS

| previous | 0.000000 | 0.000092 | -36259.867938 | <-- min BFGS

+------------+-------------+-------------+-----------------+ <-- min BFGS

--------------------------------------------------------------------------------

BFGS: starting iteration 30 with trial guess (lambda= 1.000000)

--------------------------------------------------------------------------------

-------------------------------

Unit Cell

-------------------------------

Real Lattice(A) Reciprocal Lattice(1/A)

14.8823427 -8.3277389 0.0033588 0.4200543 -0.0038177 0.0001242

0.0307576 3.3840902 -0.0034821 1.0336912 1.8472905 0.0018175

-0.0042117 -0.0113198 13.9007094 0.0001574 0.0004637 0.4520051

Lattice parameters(A) Cell Angles

a = 17.053896 alpha = 90.105767

b = 3.384232 beta = 89.981081

c = 13.900715 gamma = 118.709400

Current cell volume = 703.643957 A**3

-------------------------------

Cell Contents

-------------------------------

xxxxxxxxxxxxxxxxxxxxxxxxxxxxxxxxxxxxxxxxxxxxxxxxxxxxxxxxxxxx

x Element Atom Fractional coordinates of atoms x

x Number u v w x

x----------------------------------------------------------x

x Se 1 0.067252 0.666118 0.125446 x

x Se 2 0.132066 0.340031 0.627704 x

x Se 3 0.132252 0.341510 0.871982 x

x Se 4 0.067392 0.666797 0.375018 x

x Se 5 0.266895 0.664925 0.124686 x

x Se 6 0.332232 0.338798 0.627414 x

x Se 7 0.332360 0.340988 0.872369 x

x Se 8 0.266552 0.664035 0.374512 x

x Se 9 0.467492 0.654141 0.127921 x

x Se 10 0.532843 0.343045 0.626180 x

x Se 11 0.532507 0.345938 0.872069 x

x Se 12 0.467149 0.657042 0.373836 x

x Se 13 0.667655 0.659102 0.127612 x

x Se 14 0.733453 0.335884 0.625498 x

x Se 15 0.733100 0.334953 0.875316 x

x Se 16 0.667786 0.661330 0.372623 x

x Se 17 0.867717 0.658311 0.128040 x

x Se 18 0.932619 0.333290 0.624989 x

x Se 19 0.932759 0.333964 0.874543 x

x Se 20 0.867914 0.659790 0.372278 x

x Nb 1 0.002441 0.008561 0.249981 x

x Nb 2 -0.002493 -0.008328 0.750013 x

x Nb 3 -0.000020 -0.000234 0.000033 x

x Nb 4 -0.000028 -0.000260 0.499948 x

x Nb 5 0.197300 -0.006657 0.249905 x

x Nb 6 0.201469 0.013230 0.749468 x

x Nb 7 0.199399 0.000669 -0.000122 x

x Nb 8 0.200184 0.003271 0.500309 x

x Nb 9 0.399545 -0.009810 0.250504 x

x Nb 10 0.400051 0.004408 0.749705 x

x Nb 11 0.399898 0.003667 -0.001413 x

x Nb 12 0.398765 0.000000 0.501190 x

x Nb 13 0.599898 -0.004540 0.250292 x

x Nb 14 0.600497 0.010135 0.749481 x

x Nb 15 0.600078 -0.003808 0.001449 x

x Nb 16 0.601253 0.000020 0.498806 x

x Nb 17 0.798556 -0.013439 0.250537 x

x Nb 18 0.802736 0.006417 0.750095 x

x Nb 19 0.800649 -0.000279 0.000039 x

x Nb 20 0.799828 -0.003016 0.499745 x

xxxxxxxxxxxxxxxxxxxxxxxxxxxxxxxxxxxxxxxxxxxxxxxxxxxxxxxxxxxx

------------------------------------------------------------------------ <-- SCF

SCF loop Energy Energy gain Timer <-- SCF

per atom (sec) <-- SCF

------------------------------------------------------------------------ <-- SCF

Initial -3.62598443E+004 21949.67 <-- SCF

1 -3.62599035E+004 1.48004280E-003 21976.23 <-- SCF

2 -3.62599065E+004 7.36310173E-005 22004.16 <-- SCF

3 -3.62598880E+004 -4.61212234E-004 22030.59 <-- SCF

4 -3.62598706E+004 -4.36622167E-004 22055.94 <-- SCF

5 -3.62598706E+004 -1.17239118E-007 22080.72 <-- SCF

6 -3.62598701E+004 -1.01570420E-005 22100.70 <-- SCF

7 -3.62598701E+004 -6.49037262E-007 22119.12 <-- SCF

8 -3.62598701E+004 5.19084783E-007 22136.02 <-- SCF

------------------------------------------------------------------------ <-- SCF

Final energy = -36259.87013909 eV

(energy not corrected for finite basis set)

*********************************** Forces ***********************************

* *

* Cartesian components (eV/A) *

* -------------------------------------------------------------------------- *

* x y z *

* *

* Se 1 0.01269 0.00354 -0.01229 *

* Se 2 0.00801 0.01135 0.04134 *

* Se 3 -0.01669 -0.03443 -0.05988 *

* Se 4 0.02957 0.02643 0.02464 *

* Se 5 -0.01105 -0.02763 0.03876 *

* Se 6 0.03128 0.06742 0.05732 *

* Se 7 0.00919 0.02081 -0.00169 *

* Se 8 -0.02271 -0.02274 -0.04072 *

* Se 9 0.02514 0.04213 0.04908 *

* Se 10 0.01893 -0.03950 -0.03141 *

* Se 11 -0.02442 -0.04412 -0.04789 *

* Se 12 -0.02092 0.04275 0.03457 *

* Se 13 -0.01042 -0.02447 0.00465 *

* Se 14 0.02486 0.02030 0.04243 *

* Se 15 0.01308 0.02524 -0.03858 *

* Se 16 -0.03717 -0.06726 -0.06384 *

* Se 17 0.01929 0.03698 0.05873 *

* Se 18 -0.03018 -0.02505 -0.02846 *

* Se 19 -0.01287 -0.00168 0.01082 *

* Se 20 -0.00709 -0.00871 -0.03986 *

* Nb 1 0.06864 -0.02384 -0.01428 *

* Nb 2 -0.06580 0.01707 0.01364 *

* Nb 3 -0.00040 0.00202 -0.00309 *

* Nb 4 0.00159 0.00278 0.00333 *

* Nb 5 0.02799 0.00232 -0.02301 *

* Nb 6 0.05941 -0.01264 0.00529 *

* Nb 7 0.00797 0.02757 -0.06148 *

* Nb 8 0.05332 0.03469 0.04822 *

* Nb 9 -0.03009 0.00784 0.00334 *

* Nb 10 0.05810 0.08689 0.03695 *

* Nb 11 0.04337 -0.01011 0.04378 *

* Nb 12 -0.04319 -0.05284 -0.04860 *

* Nb 13 -0.05391 -0.08493 -0.03476 *

* Nb 14 0.02621 -0.01104 -0.00349 *

* Nb 15 -0.04280 0.01104 -0.04625 *

* Nb 16 0.04284 0.05401 0.05048 *

* Nb 17 -0.06225 0.01567 -0.00491 *

* Nb 18 -0.02812 0.00077 0.02328 *

* Nb 19 -0.00793 -0.03056 0.06620 *

* Nb 20 -0.05345 -0.03802 -0.05235 *

* *

******************************************************************************

***************** Stress Tensor *****************

* *

* Cartesian components (GPa) *

* --------------------------------------------- *

* x y z *

* *

* x -0.117307 0.088972 -0.025536 *

* y 0.088972 -0.075502 -0.188517 *

* z -0.025536 -0.188517 -0.043396 *

* *

* Pressure: 0.0787 *

* *

*************************************************

+------------+-------------+-------------+-----------------+ <-- min BFGS

| Step | lambda | F.delta | enthalpy | <-- min BFGS

+------------+-------------+-------------+-----------------+ <-- min BFGS

| previous | 0.000000 | 0.000092 | -36259.867938 | <-- min BFGS

| trial step | 1.000000 | 0.000068 | -36259.870153 | <-- min BFGS

+------------+-------------+-------------+-----------------+ <-- min BFGS

--------------------------------------------------------------------------------

BFGS: improving iteration 30 with line minimization (lambda= 3.894702)

--------------------------------------------------------------------------------

-------------------------------

Unit Cell

-------------------------------

Real Lattice(A) Reciprocal Lattice(1/A)

14.8966261 -8.3307295 -0.0030666 0.4196432 -0.0038314 0.0001384

0.0309113 3.3855849 -0.0011569 1.0325939 1.8464365 0.0008449

-0.0046156 -0.0037770 13.8945795 0.0001786 0.0001529 0.4522042

Lattice parameters(A) Cell Angles

a = 17.067822 alpha = 90.035325

b = 3.385726 beta = 90.019304

c = 13.894581 gamma = 118.692374

Current cell volume = 704.334232 A**3

-------------------------------

Cell Contents

-------------------------------

xxxxxxxxxxxxxxxxxxxxxxxxxxxxxxxxxxxxxxxxxxxxxxxxxxxxxxxxxxxx

x Element Atom Fractional coordinates of atoms x

x Number u v w x

x----------------------------------------------------------x

x Se 1 0.067299 0.666310 0.125418 x

x Se 2 0.131993 0.340526 0.628086 x

x Se 3 0.132196 0.341970 0.871643 x

x Se 4 0.067459 0.667093 0.375067 x

x Se 5 0.266886 0.664736 0.124606 x

x Se 6 0.332350 0.339733 0.627736 x

x Se 7 0.332409 0.341931 0.872199 x

x Se 8 0.266490 0.663766 0.374424 x

x Se 9 0.467533 0.653301 0.128157 x

x Se 10 0.532878 0.343774 0.626311 x

x Se 11 0.532467 0.346793 0.871829 x

x Se 12 0.467113 0.656338 0.373710 x

x Se 13 0.667604 0.658151 0.127792 x

x Se 14 0.733520 0.336148 0.625588 x

x Se 15 0.733110 0.335124 0.875396 x

x Se 16 0.667664 0.660402 0.372296 x

x Se 17 0.867769 0.657838 0.128375 x

x Se 18 0.932552 0.333009 0.624938 x

x Se 19 0.932713 0.333780 0.874571 x

x Se 20 0.867985 0.659274 0.371903 x

x Nb 1 0.002817 0.009689 0.249974 x

x Nb 2 -0.002871 -0.009451 0.750017 x

x Nb 3 -0.000022 -0.000253 0.000032 x

x Nb 4 -0.000031 -0.000280 0.499946 x

x Nb 5 0.197127 -0.007159 0.249869 x

x Nb 6 0.201610 0.014550 0.749414 x

x Nb 7 0.199351 0.000911 -0.000229 x

x Nb 8 0.200246 0.003855 0.500400 x

x Nb 9 0.399466 -0.011049 0.250581 x

x Nb 10 0.400092 0.005325 0.749662 x

x Nb 11 0.399945 0.004043 -0.001539 x

x Nb 12 0.398623 -0.000297 0.501291 x

x Nb 13 0.599856 -0.005450 0.250336 x

x Nb 14 0.600576 0.011383 0.749403 x

x Nb 15 0.600030 -0.004196 0.001575 x

x Nb 16 0.601397 0.000321 0.498707 x

x Nb 17 0.798414 -0.014777 0.250589 x

x Nb 18 0.802913 0.006908 0.750131 x

x Nb 19 0.800702 -0.000488 0.000142 x

x Nb 20 0.799769 -0.003581 0.499655 x

xxxxxxxxxxxxxxxxxxxxxxxxxxxxxxxxxxxxxxxxxxxxxxxxxxxxxxxxxxxx

------------------------------------------------------------------------ <-- SCF

SCF loop Energy Energy gain Timer <-- SCF

per atom (sec) <-- SCF

------------------------------------------------------------------------ <-- SCF

Initial -3.62596549E+004 22239.44 <-- SCF

1 -3.62601642E+004 1.27314812E-002 22266.19 <-- SCF

2 -3.62601897E+004 6.38358594E-004 22295.38 <-- SCF

3 -3.62600303E+004 -3.98436510E-003 22321.67 <-- SCF

4 -3.62598757E+004 -3.86407065E-003 22347.55 <-- SCF

5 -3.62598748E+004 -2.30659583E-005 22373.31 <-- SCF

6 -3.62598725E+004 -5.86143499E-005 22398.48 <-- SCF

7 -3.62598723E+004 -3.60893628E-006 22421.75 <-- SCF

8 -3.62598724E+004 2.26837845E-006 22440.88 <-- SCF

9 -3.62598724E+004 -1.33285777E-006 22458.94 <-- SCF

10 -3.62598724E+004 -5.99256669E-009 22476.41 <-- SCF

------------------------------------------------------------------------ <-- SCF

Final energy = -36259.87237255 eV

(energy not corrected for finite basis set)

*********************************** Forces ***********************************

* *

* Cartesian components (eV/A) *

* -------------------------------------------------------------------------- *

* x y z *

* *

* Se 1 0.01467 0.00444 -0.03703 *

* Se 2 0.02437 0.01280 -0.02937 *

* Se 3 -0.01617 -0.05095 -0.02215 *

* Se 4 0.03237 0.02594 0.04743 *

* Se 5 -0.01251 -0.02588 0.03437 *

* Se 6 0.00807 0.08303 -0.02582 *

* Se 7 0.01628 -0.02828 0.06443 *

* Se 8 -0.02212 -0.01031 -0.02171 *

* Se 9 -0.00611 0.10195 -0.02688 *

* Se 10 -0.00164 -0.02930 -0.04952 *

* Se 11 0.00683 -0.10624 0.03008 *

* Se 12 -0.00290 0.03280 0.05489 *

* Se 13 -0.01734 0.02355 -0.06350 *

* Se 14 0.02382 0.00840 0.02422 *

* Se 15 0.01429 0.02414 -0.03342 *

* Se 16 -0.01052 -0.08599 0.01743 *

* Se 17 0.02136 0.05587 0.01969 *

* Se 18 -0.03314 -0.02464 -0.05193 *

* Se 19 -0.01520 -0.00264 0.03600 *

* Se 20 -0.02326 -0.00787 0.02723 *

* Nb 1 0.05902 -0.02817 -0.00776 *

* Nb 2 -0.05640 0.02064 0.00751 *

* Nb 3 -0.00029 0.00271 -0.00304 *

* Nb 4 0.00187 0.00350 0.00358 *

* Nb 5 0.04275 0.00175 -0.02510 *

* Nb 6 0.05958 -0.02635 0.01672 *

* Nb 7 0.01525 0.02724 -0.06132 *

* Nb 8 0.05345 0.03127 0.05099 *

* Nb 9 -0.03121 0.02684 -0.01002 *

* Nb 10 0.06764 0.08858 0.04784 *

* Nb 11 0.04663 -0.01693 0.06162 *

* Nb 12 -0.03733 -0.05178 -0.05981 *

* Nb 13 -0.06350 -0.08670 -0.04548 *

* Nb 14 0.02652 -0.03024 0.01042 *

* Nb 15 -0.04583 0.01818 -0.06400 *

* Nb 16 0.03655 0.05339 0.06182 *

* Nb 17 -0.06267 0.03008 -0.01577 *

* Nb 18 -0.04305 0.00188 0.02565 *

* Nb 19 -0.01605 -0.03133 0.06711 *

* Nb 20 -0.05406 -0.03540 -0.05539 *

* *

******************************************************************************

***************** Stress Tensor *****************

* *

* Cartesian components (GPa) *

* --------------------------------------------- *

* x y z *

* *

* x 0.076904 0.085348 -0.039505 *

* y 0.085348 0.042210 -0.023060 *

* z -0.039505 -0.023060 -0.031106 *

* *

* Pressure: -0.0293 *

* *

*************************************************

+------------+-------------+-------------+-----------------+ <-- min BFGS

| Step | lambda | F.delta | enthalpy | <-- min BFGS

+------------+-------------+-------------+-----------------+ <-- min BFGS

| previous | 0.000000 | 0.000092 | -36259.867938 | <-- min BFGS

| trial step | 1.000000 | 0.000068 | -36259.870153 | <-- min BFGS

| line step | 3.894702 | -8.242E-006 | -36259.872470 | <-- min BFGS

+------------+-------------+-------------+-----------------+ <-- min BFGS

BFGS: finished iteration 30 with enthalpy= -3.62598725E+004 eV

+-----------+-----------------+-----------------+------------+-----+ <-- BFGS

| Parameter | value | tolerance | units | OK? | <-- BFGS

+-----------+-----------------+-----------------+------------+-----+ <-- BFGS

| dE/ion | 1.133180E-004 | 5.000000E-006 | eV | No | <-- BFGS

| |F|max | 1.212916E-001 | 1.000000E-002 | eV/A | No | <-- BFGS

| |dR|max | 7.909884E-003 | 5.000000E-004 | A | No | <-- BFGS

| Smax | 8.534775E-002 | 2.000000E-002 | GPa | No | <-- BFGS

+-----------+-----------------+-----------------+------------+-----+ <-- BFGS

================================================================================

Starting BFGS iteration 31 ...

================================================================================

+------------+-------------+-------------+-----------------+ <-- min BFGS

| Step | lambda | F.delta | enthalpy | <-- min BFGS

+------------+-------------+-------------+-----------------+ <-- min BFGS

| previous | 0.000000 | 0.000130 | -36259.872470 | <-- min BFGS

+------------+-------------+-------------+-----------------+ <-- min BFGS

--------------------------------------------------------------------------------

BFGS: starting iteration 31 with trial guess (lambda= 1.000000)

--------------------------------------------------------------------------------

-------------------------------

Unit Cell

-------------------------------

Real Lattice(A) Reciprocal Lattice(1/A)

14.8975541 -8.3366408 -0.0062339 0.4197234 -0.0036386 0.0001703

0.0293475 3.3852914 -0.0004439 1.0336138 1.8470645 0.0006180

-0.0056532 -0.0014860 13.8973071 0.0002213 0.0000574 0.4521154

Lattice parameters(A) Cell Angles

a = 17.071518 alpha = 90.013841

b = 3.385419 beta = 90.038270

c = 13.897308 gamma = 118.734590

Current cell volume = 704.276751 A**3

-------------------------------

Cell Contents

-------------------------------

xxxxxxxxxxxxxxxxxxxxxxxxxxxxxxxxxxxxxxxxxxxxxxxxxxxxxxxxxxxx

x Element Atom Fractional coordinates of atoms x

x Number u v w x

x----------------------------------------------------------x

x Se 1 0.067325 0.666457 0.125325 x

x Se 2 0.131933 0.340265 0.628174 x

x Se 3 0.132134 0.341476 0.871651 x

x Se 4 0.067502 0.667291 0.375151 x

x Se 5 0.266859 0.664539 0.124513 x

x Se 6 0.332510 0.340232 0.627744 x

x Se 7 0.332445 0.342098 0.872412 x

x Se 8 0.266462 0.663657 0.374430 x

x Se 9 0.467598 0.653935 0.128008 x

x Se 10 0.532863 0.343338 0.626276 x

x Se 11 0.532403 0.346166 0.871974 x

x Se 12 0.467128 0.656795 0.373750 x

x Se 13 0.667563 0.657957 0.127596 x

x Se 14 0.733553 0.336266 0.625582 x

x Se 15 0.733141 0.335317 0.875489 x

x Se 16 0.667496 0.659891 0.372276 x

x Se 17 0.867830 0.658341 0.128358 x

x Se 18 0.932508 0.332817 0.624849 x

x Se 19 0.932685 0.333626 0.874667 x

x Se 20 0.868045 0.659533 0.371828 x

x Nb 1 0.002828 0.009383 0.249981 x

x Nb 2 -0.002876 -0.009171 0.750008 x

x Nb 3 -0.000022 -0.000241 0.000026 x

x Nb 4 -0.000029 -0.000264 0.499951 x

x Nb 5 0.197182 -0.006972 0.249852 x

x Nb 6 0.201679 0.014744 0.749412 x

x Nb 7 0.199387 0.001195 -0.000323 x

x Nb 8 0.200304 0.004189 0.500444 x

x Nb 9 0.399423 -0.011315 0.250636 x

x Nb 10 0.400169 0.006117 0.749637 x

x Nb 11 0.399994 0.004020 -0.001444 x

x Nb 12 0.398586 -0.000681 0.501184 x

x Nb 13 0.599787 -0.006210 0.250363 x

x Nb 14 0.600614 0.011610 0.749348 x

x Nb 15 0.599980 -0.004168 0.001474 x

x Nb 16 0.601433 0.000702 0.498816 x

x Nb 17 0.798340 -0.014963 0.250589 x

x Nb 18 0.802857 0.006740 0.750146 x

x Nb 19 0.800667 -0.000787 0.000243 x

x Nb 20 0.799711 -0.003925 0.499603 x

xxxxxxxxxxxxxxxxxxxxxxxxxxxxxxxxxxxxxxxxxxxxxxxxxxxxxxxxxxxx

------------------------------------------------------------------------ <-- SCF

SCF loop Energy Energy gain Timer <-- SCF

per atom (sec) <-- SCF

------------------------------------------------------------------------ <-- SCF

Initial -3.62598265E+004 22579.84 <-- SCF

1 -3.62599977E+004 4.27833044E-003 22607.28 <-- SCF

2 -3.62600076E+004 2.47066272E-004 22635.58 <-- SCF

3 -3.62600019E+004 -1.41142500E-004 22662.44 <-- SCF

4 -3.62598689E+004 -3.32456925E-003 22688.25 <-- SCF

5 -3.62598783E+004 2.34948094E-004 22715.28 <-- SCF

6 -3.62598762E+004 -5.21508948E-005 22740.77 <-- SCF

7 -3.62598749E+004 -3.37532818E-005 22762.62 <-- SCF

8 -3.62598748E+004 -2.52922416E-006 22782.27 <-- SCF

9 -3.62598748E+004 1.10064867E-006 22800.50 <-- SCF

10 -3.62598749E+004 1.06094911E-006 22817.78 <-- SCF

11 -3.62598749E+004 7.01280032E-007 22834.27 <-- SCF

------------------------------------------------------------------------ <-- SCF

Final energy = -36259.87490120 eV

(energy not corrected for finite basis set)

*********************************** Forces ***********************************

* *

* Cartesian components (eV/A) *

* -------------------------------------------------------------------------- *

* x y z *

* *

* Se 1 0.01402 0.00883 -0.03292 *

* Se 2 0.04723 0.02113 -0.03633 *

* Se 3 0.00175 -0.02925 -0.03008 *

* Se 4 0.02988 0.02339 0.03561 *

* Se 5 -0.00694 -0.01476 0.04254 *

* Se 6 -0.03417 0.09204 -0.01074 *

* Se 7 0.00210 -0.02760 -0.02558 *

* Se 8 -0.01761 -0.00207 -0.02390 *

* Se 9 -0.02839 0.06391 0.03352 *

* Se 10 0.01961 -0.02543 -0.05441 *

* Se 11 0.02858 -0.06921 -0.02885 *

* Se 12 -0.02521 0.02864 0.05988 *

* Se 13 -0.00341 0.02441 0.01915 *

* Se 14 0.01818 0.00037 0.02657 *

* Se 15 0.00799 0.01398 -0.04094 *

* Se 16 0.03537 -0.09621 0.00586 *

* Se 17 0.00381 0.03291 0.02964 *

* Se 18 -0.03023 -0.02231 -0.04000 *

* Se 19 -0.01437 -0.00752 0.03166 *

* Se 20 -0.04601 -0.01489 0.03188 *

* Nb 1 0.07161 -0.01975 -0.01615 *

* Nb 2 -0.07078 0.01361 0.01617 *

* Nb 3 -0.00023 0.00248 -0.00246 *

* Nb 4 0.00195 0.00335 0.00306 *

* Nb 5 0.02973 -0.00702 -0.03146 *

* Nb 6 0.06319 -0.02861 0.02343 *

* Nb 7 0.00433 0.01891 -0.05542 *

* Nb 8 0.05347 0.02496 0.05617 *

* Nb 9 -0.01793 0.03983 -0.02955 *

* Nb 10 0.05133 0.07239 0.07011 *

* Nb 11 0.04183 -0.01170 0.05329 *

* Nb 12 -0.03479 -0.04158 -0.04793 *

* Nb 13 -0.04901 -0.07087 -0.06794 *

* Nb 14 0.01385 -0.04222 0.02988 *

* Nb 15 -0.04062 0.01283 -0.05489 *

* Nb 16 0.03452 0.04344 0.04965 *

* Nb 17 -0.06470 0.03168 -0.02143 *

* Nb 18 -0.02936 0.00981 0.03217 *

* Nb 19 -0.00578 -0.02283 0.06051 *

* Nb 20 -0.05481 -0.02903 -0.05977 *

* *

******************************************************************************

***************** Stress Tensor *****************

* *

* Cartesian components (GPa) *

* --------------------------------------------- *

* x y z *

* *

* x 0.047993 0.037350 -0.065576 *

* y 0.037350 0.026107 0.022318 *

* z -0.065576 0.022318 0.003319 *

* *

* Pressure: -0.0258 *

* *

*************************************************

+------------+-------------+-------------+-----------------+ <-- min BFGS

| Step | lambda | F.delta | enthalpy | <-- min BFGS

+------------+-------------+-------------+-----------------+ <-- min BFGS

| previous | 0.000000 | 0.000130 | -36259.872470 | <-- min BFGS

| trial step | 1.000000 | 0.000055 | -36259.874959 | <-- min BFGS
[truncated: 860,862 more chars]
